# Supplementary material for: Postdiagenetic Changes in Kerogen Properties and Type by Bacterial Oxidation and Dehydrogenation
Source: Molecules. 2022 Apr 8;27(8):2408. doi: 10.3390/molecules27082408 (PMC9030554; doi:10.3390/molecules27082408)
Supplement: Supplementary file 1 [file molecules-27-02408-s001.zip]

Archive with 5 entries (5 files):
- Supplementary Information A_Supplementary Figures and Table.pdf
- Supplementary Information B_Metaproteomes of bacteria inhabiting shale rock.xlsx
- Supplementary Information C_Taxonomic composition of bacteria inhabiting shale rock.xlsx
- Supplementary Information D_ Biolog EcoPlate Methods.pdf
- Supplementary Information E_Ion_16S_Methods.pdf
