# Supplementary material for: Postdiagenetic Changes in Kerogen Properties and Type by Bacterial Oxidation and Dehydrogenation
Source: Molecules. 2022 Apr 8;27(8):2408. doi: 10.3390/molecules27082408 (PMC9030554; doi:10.3390/molecules27082408)
Supplement: Supplementary file 1 [file molecules-27-02408-s001.zip › Supplementary Information A_Supplementary Figures and Table.pdf]

### Supplementary Information A.

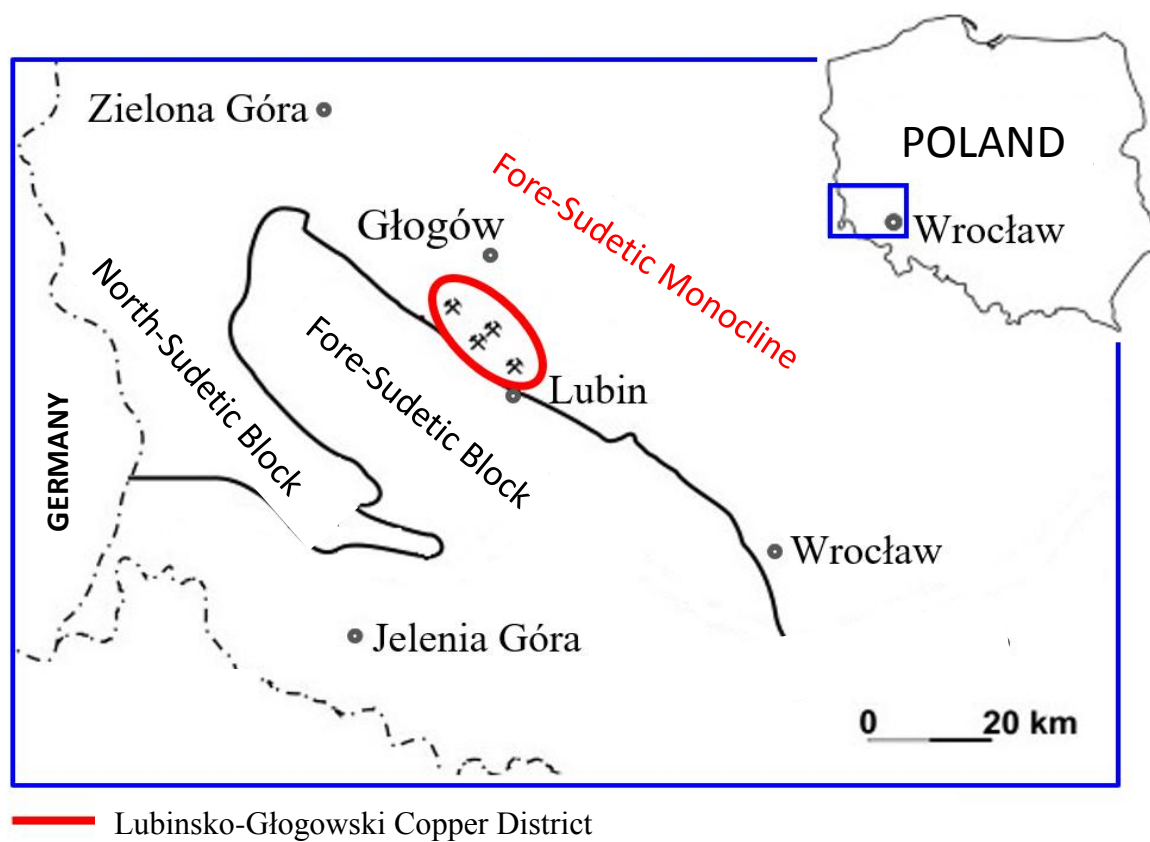

**Figure S1.** Localization of Fore-Sudetic Monocline and Lubinsko-Głogowski Copper District (red circle)

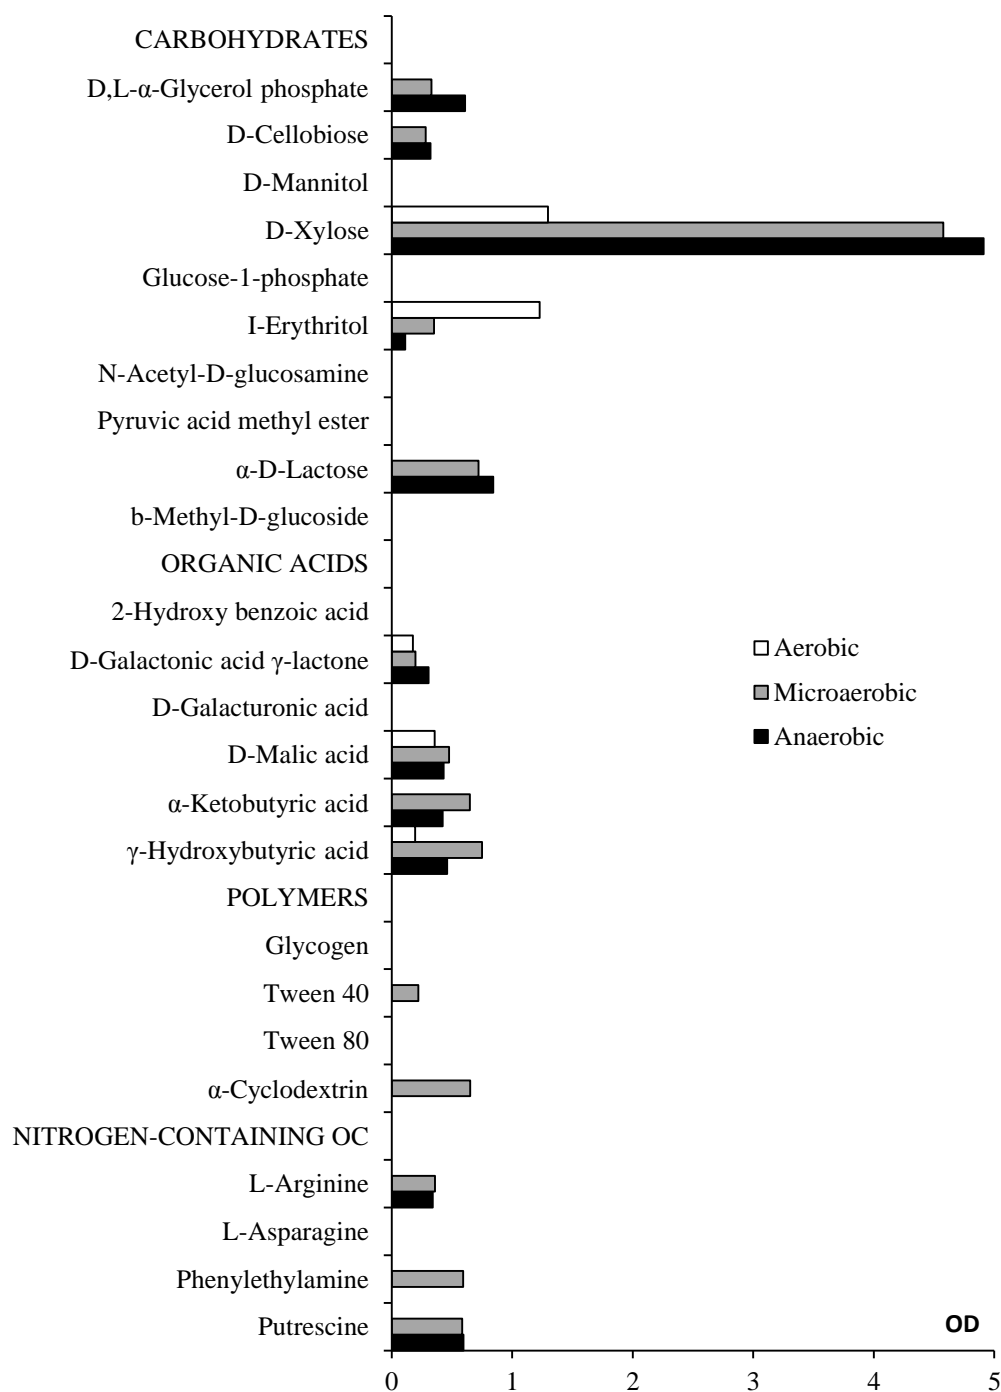

**Figure S2.** Metabolic activity of microorganisms inhabiting shale rock enriched in kerogen III under aerobic, microaerophilic and anaerobic conditions; the optical density (OD) values correspond to the degradation intensity of organic compounds; OC – organic compounds

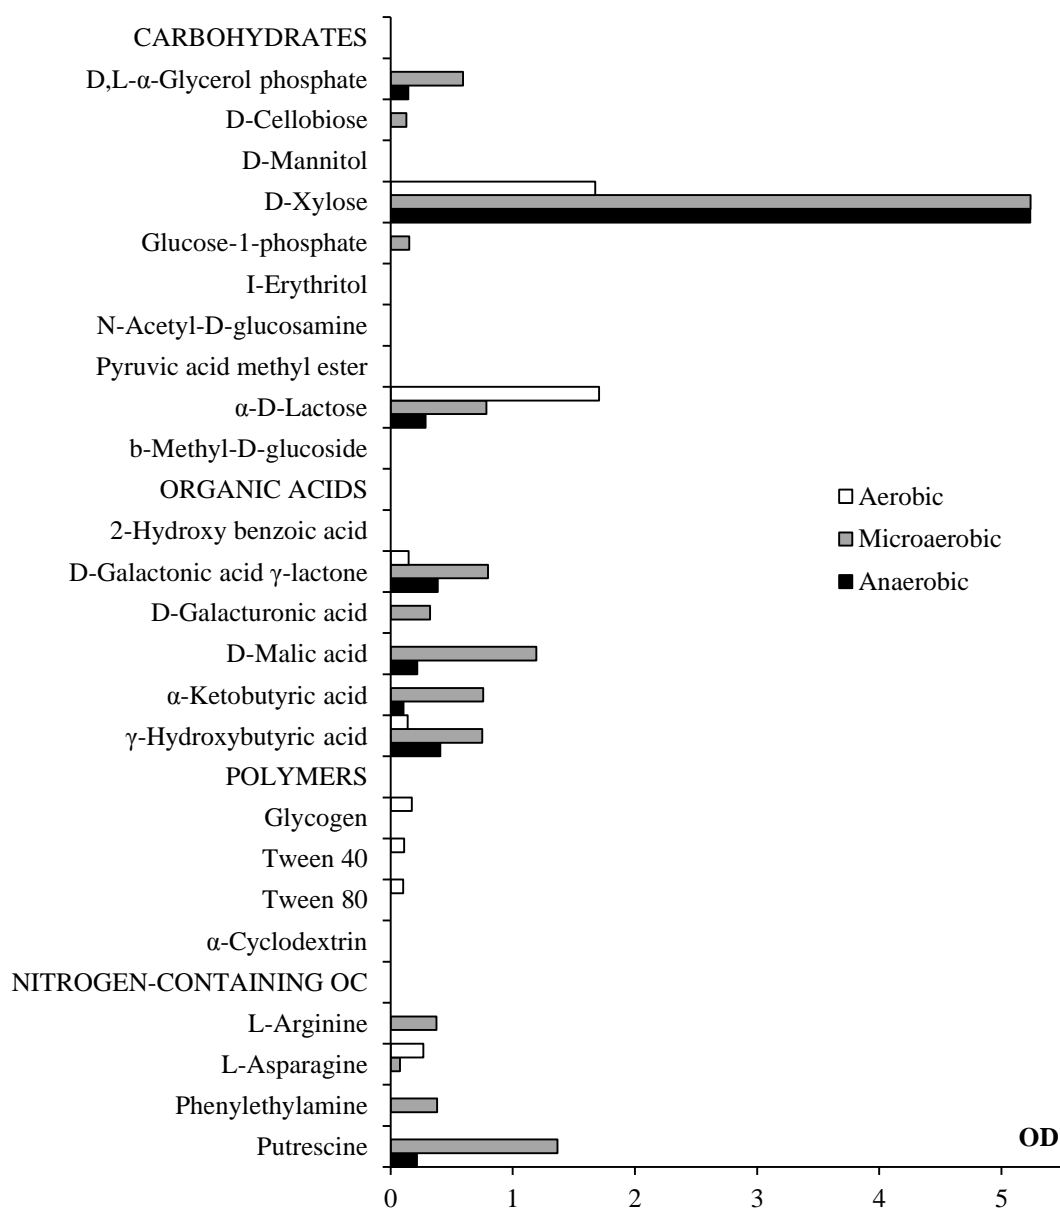

**Figure S3.** Metabolic activity of microorganisms inhabiting shale rock enriched in kerogen IV.1 under aerobic, microaerophilic and anaerobic conditions; the optical density (OD) values correspond to the degradation intensity of organic compounds; OC – organic compounds

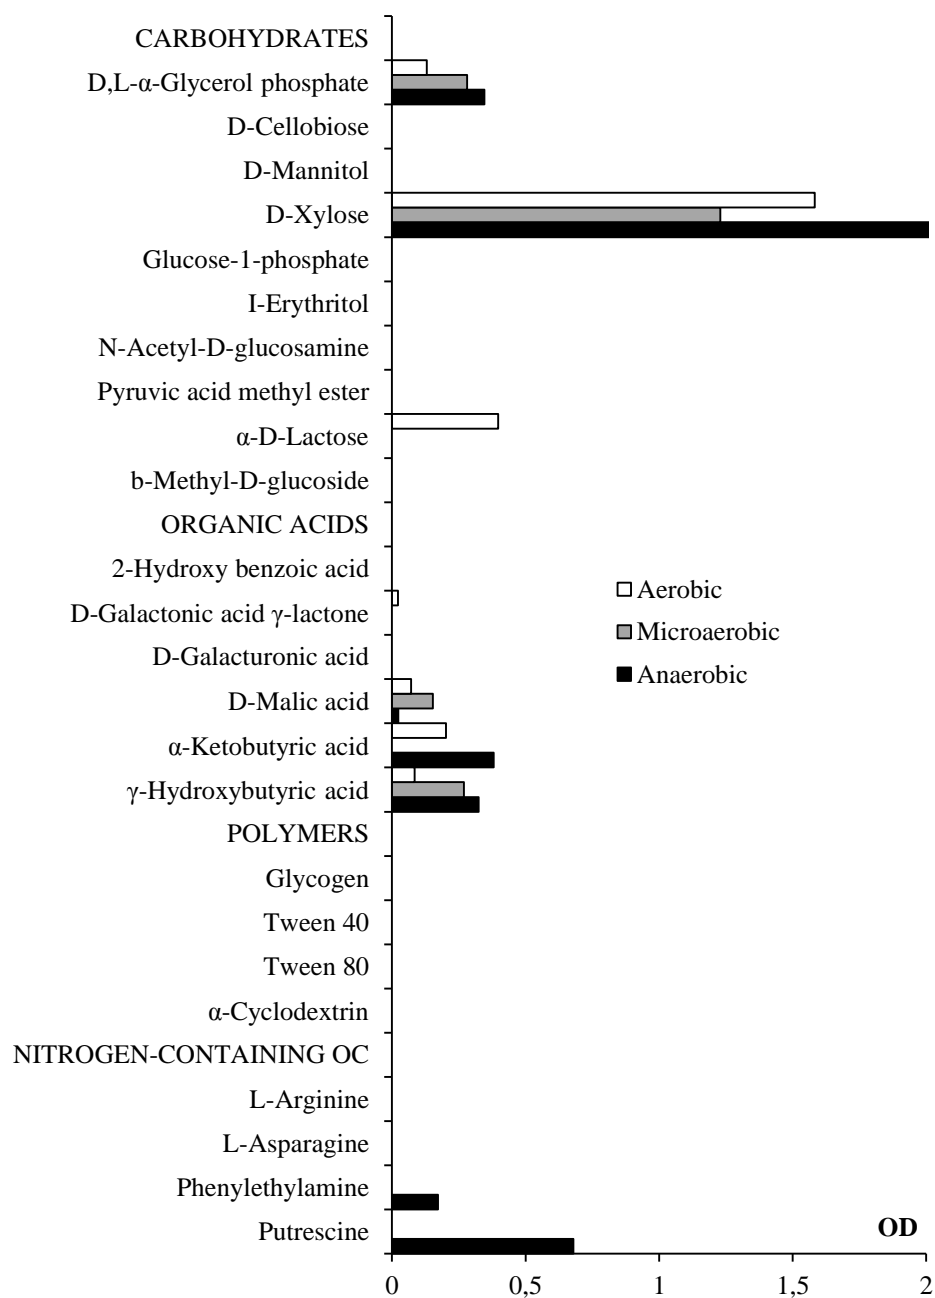

**Figure S4.** Metabolic activity of microorganisms inhabiting shale rock enriched in kerogen IV.2 under aerobic, microaerophilic and anaerobic conditions; the optical density (OD) values correspond to the degradation intensity of organic compounds; OC – organic compounds

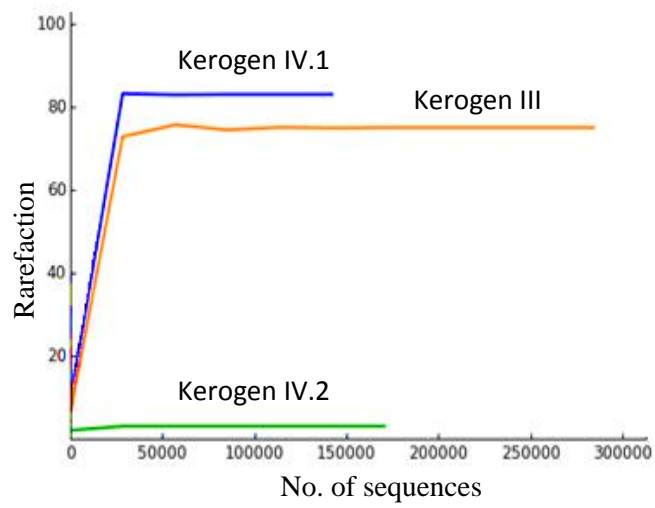

**Figure S5.** Rarefaction curve of 16S rDNA sequencing of three samples (kerogen III, IV.1 and IV.2)

**Table S1.** Characteristics of research stands where shale rock samples were collected

| Parametr       | Research stand |         |         |         |         |
|----------------|----------------|---------|---------|---------|---------|
|                | Stand 1        | Stand 1 | Stand 3 | Stand 4 | Stand 5 |
| Depth (m)      | 600            | 650     | 700     | 780     | 650     |
| Temperature    | 22             | 23      | 26      | 22      | 25      |
| Pressure (hPa) | 1044           | 1065    | 1080    | 1070    | 1067    |
