# Supplementary material for: Postdiagenetic Changes in Kerogen Properties and Type by Bacterial Oxidation and Dehydrogenation
Source: Molecules. 2022 Apr 8;27(8):2408. doi: 10.3390/molecules27082408 (PMC9030554; doi:10.3390/molecules27082408)
Supplement: Supplementary file 1 [file molecules-27-02408-s001.zip › Supplementary Information B_Metaproteomes of bacteria inhabiting shale rock.xlsx]

## Sheet: Kerogen III
Accession	Score	Mass	Matches	Pep(sig)	Sequences	Seq(sig)	emPAI	Description
gi|495934399	54	21759	1	1	1	1	0.15	(CYCLOPHILIN 5) peptidyl-prolyl cis-trans isomerase [Rhodopirellula europaea]
gi|490507077	60	50557	1	1	1	1	0.07	(dimethylallyl)adenosine tRNA methylthiotransferase [Prevotella oris]
gi|490507077	58	50557	1	1	1	1	0.09	(dimethylallyl)adenosine tRNA methylthiotransferase [Prevotella oris]
gi|446081568	70	36038	1	1	1	1	0.12	16S rRNA methyltransferase [Streptococcus oralis]
gi|489174023	67	35965	1	1	1	1	0.12	16S rRNA methyltransferase [Streptococcus porcinus]
gi|260862972	79	68251	1	1	1	1	0.06	1-deoxy-D-xylulose-5-phosphate synthase [Selenomonas sputigena ATCC 35185]
gi|491329536	60	30904	1	1	1	1	0.15	2,5-diketo-D-gluconic acid reductase [Gordonia amarae]
gi|149355888	64	43710	1	1	1	1	0.08	2-amino-3-ketobutyrate coenzyme A ligase [unidentified eubacterium SCB49]
gi|495201528	61	64362	1	1	1	1	0.07	2-isopropylmalate synthase [Janibacter hoylei]
gi|545646926	61	26737	1	1	1	1	0.12	2-isopropylmalate synthase [Leifsonia xyli]
gi|488794499	87	61764	2	2	1	1	0.11	30S ribosomal protein S1 [Thiothrix nivea]
gi|489566175	47	12534	1	1	1	1	0.27	30S ribosomal protein S10 [Xanthomonas translucens]
gi|648271136	92	13510	2	2	2	2	0.57	30S ribosomal protein S12, partial [Herbaspirillum seropedicae]
gi|516025088	108	11484	2	2	1	1	0.30	30S ribosomal protein S3, partial [Herbaspirillum rubrisubalbicans]
gi|655040476	82	23304	1	1	1	1	0.14	30S ribosomal protein S4 [Thiothrix lacustris]
gi|648474225	63	11039	1	1	1	1	0.31	30S ribosomal protein S6 [Corynebacterium mastitidis]
gi|648271267	47	13915	1	1	1	1	0.25	30S ribosomal protein S8 [Herbaspirillum rubrisubalbicans]
gi|504018358	61	31230	1	1	1	1	0.11	3-alpha,7-alpha,12-alpha-trihydroxy-5-beta-cholest-24-enoyl-CoA hydratase [Burkholderia sp. YI23]
gi|489258035	150	30459	14	14	1	1	0.23	3-hydroxyacyl-CoA dehydrogenase [Brevundimonas diminuta]
gi|489258035	126	30459	11	11	1	1	0.23	3-hydroxyacyl-CoA dehydrogenase [Brevundimonas diminuta]
gi|489258035	136	30459	9	9	1	1	0.32	3-hydroxyacyl-CoA dehydrogenase [Brevundimonas diminuta]
gi|489258035	70	30459	2	2	1	1	0.15	3-hydroxyacyl-CoA dehydrogenase [Brevundimonas diminuta]
gi|489258035	78	30459	5	5	1	1	0.15	3-hydroxyacyl-CoA dehydrogenase [Brevundimonas diminuta]
gi|489258035	59	30459	2	2	1	1	0.11	3-hydroxyacyl-CoA dehydrogenase [Brevundimonas diminuta]
gi|489258035	52	30459	2	2	1	1	0.32	3-hydroxyacyl-CoA dehydrogenase [Brevundimonas diminuta]
gi|489258035	58	30459	4	4	1	1	0.32	3-hydroxyacyl-CoA dehydrogenase [Brevundimonas diminuta]
gi|515485000	62	79414	3	3	1	1	0.04	3-hydroxyacyl-CoA dehydrogenase [Methylocystis parvus]
gi|515485000	84	79414	9	9	1	1	0.04	3-hydroxyacyl-CoA dehydrogenase [Methylocystis parvus]
gi|515485000	74	79414	6	6	1	1	0.05	3-hydroxyacyl-CoA dehydrogenase [Methylocystis parvus]
gi|515485000	62	79414	1	1	1	1	0.05	3-hydroxyacyl-CoA dehydrogenase [Methylocystis parvus]
gi|515485000	58	79414	1	1	1	1	0.05	3-hydroxyacyl-CoA dehydrogenase [Methylocystis parvus]
gi|659872439	46	77355	1	1	1	1	0.04	3-hydroxyacyl-CoA dehydrogenase [Nevskia soli]
gi|504425725	38	84935	2	2	1	1	0.04	3-hydroxyacyl-CoA dehydrogenase [Staphylococcus pseudintermedius]
gi|653032959	32	49783	1	1	1	1	0.07	3-isopropylmalate dehydratase [Rubritepida flocculans]
gi|494267220	31	38676	1	1	1	1	0.09	3-isopropylmalate dehydrogenase [Marinobacter algicola]
gi|494267220	36	38676	1	1	1	1	0.09	3-isopropylmalate dehydrogenase [Marinobacter algicola]
gi|547466170	56	44136	3	3	1	1	0.07	3-oxoacyl-[acyl-carrier-protein] synthase 2 [Roseburia sp. CAG:197]
gi|547466170	55	44136	1	1	1	1	0.10	3-oxoacyl-[acyl-carrier-protein] synthase 2 [Roseburia sp. CAG:197]
gi|655041172	127	43587	3	3	2	2	0.16	3-oxoacyl-ACP synthase [Thiothrix lacustris]
gi|655041172	132	43587	11	11	1	1	0.08	3-oxoacyl-ACP synthase [Thiothrix lacustris]
gi|655041172	45	43587	1	1	1	1	0.10	3-oxoacyl-ACP synthase [Thiothrix lacustris]
gi|606234771	55	46364	1	1	1	1	0.07	4-aminobutyrate aminotransferase [Streptomyces sp. PCS3-D2]
gi|490333293	62	31939	1	1	1	1	0.14	4-diphosphocytidyl-2C-methyl-D-erythritol kinase [Bifidobacterium pseudocatenulatum]
gi|502927860	55	30954	1	1	1	1	0.11	4-diphosphocytidyl-2C-methyl-D-erythritol kinase [Desulfurivibrio alkaliphilus]
gi|655041659	46	27408	1	1	1	1	0.12	4Fe-4S ferredoxin [Thiothrix lacustris]
gi|516025084	83	12774	2	2	2	2	0.61	50S ribosomal protein L1, partial [Herbaspirillum rubrisubalbicans]
gi|516025079	54	12599	1	1	1	1	0.27	50S ribosomal protein L11, partial [Herbaspirillum rubrisubalbicans]
gi|692535863	118	6909	1	1	1	1	0.52	50S ribosomal protein L14, partial [Acinetobacter sp. MII]
gi|488797342	77	14308	1	1	1	1	0.24	50S ribosomal protein L17 [Thiothrix nivea]
gi|23476457	36	12872	1	1	1	1	0.27	50S ribosomal protein L22 [Streptococcus pneumoniae]
gi|488797327	56	11426	1	1	1	1	0.30	50S ribosomal protein L24 [Thiothrix nivea]
gi|488797324	82	7375	1	1	1	1	0.48	50S ribosomal protein L29 [Thiothrix nivea]
gi|516025100	60	8020	1	1	1	1	0.44	50S ribosomal protein L29, partial [Herbaspirillum rubrisubalbicans]
gi|488796445	103	9295	1	1	1	1	0.37	50S ribosomal protein L31 [Thiothrix nivea]
gi|655040445	103	12883	4	4	1	1	0.27	50S ribosomal protein L7/L12 [Thiothrix lacustris]
gi|577000849	45	9215	1	1	1	1	0.38	50S ribosomal subunit protein L28 [Candidatus Contendobacter odensis Run_B_J11]
gi|205318630	4084	13094	141	141	4	4	3.02	60 kDa chaperonin [Thiothrix sp. CT3]
gi|205318630	809	13094	34	34	3	3	1.53	60 kDa chaperonin [Thiothrix sp. CT3]
gi|205318630	169	13094	10	10	2	2	0.88	60 kDa chaperonin [Thiothrix sp. CT3]
gi|471778023	192	11835	6	6	1	1	0.29	60 kDa chaperonin, partial [uncultured bacterium]
gi|471776770	62	20212	2	2	1	1	0.17	60 kDa chaperonin, partial [uncultured bacterium]
gi|471778023	59	11835	1	1	1	1	0.41	60 kDa chaperonin, partial [uncultured bacterium]
gi|477763264	67	8028	2	2	1	1	1.08	6-phospho-beta-galactosidase [Staphylococcus aureus M0351]
gi|740896638	37	33842	1	1	1	1	0.13	6-phosphofructokinase [Rubrobacter radiotolerans]
gi|518385091	39	46165	1	1	1	1	0.10	6-phosphofructokinase [Zymophilus raffinosivorans]
gi|518385091	36	46165	1	1	1	1	0.10	6-phosphofructokinase [Zymophilus raffinosivorans]
gi|494055040	36	31212	1	1	1	1	0.14	6-phosphogluconate dehydrogenase [Candidatus Pelagibacter ubique]
gi|504518885	96	53576	1	1	1	1	0.06	6-phosphogluconate dehydrogenase [Methylophaga nitratireducenticrescens]
gi|505204587	57	67784	1	1	1	1	0.06	AAA-ATPase-like protein [Clostridium saccharoperbutylacetonicum]
gi|488926896	60	29220	1	1	1	1	0.11	ABC transporter [Finegoldia magna]
gi|503191633	64	44472	1	1	1	1	0.07	ABC transporter [Frankia sp. EuI1c]
gi|654992895	38	35121	1	1	1	1	0.13	ABC transporter [Streptomyces sp. DpondAA-B6]
gi|517369697	78	66057	8	8	1	1	0.07	ABC transporter [Streptomyces sp. LaPpAH-108]
gi|518159278	29	37017	1	1	1	1	0.09	ABC transporter [Streptomyces sp. TOR3209]
gi|494762492	61	64724	1	1	1	1	0.05	abc transporter atp-binding protein [Bacillus stratosphericus]
gi|703064257	55	68921	1	1	1	1	0.06	ABC transporter ATP-binding protein [Catenuloplanes japonicus]
gi|654984058	52	49732	2	2	1	1	0.09	ABC transporter ATP-binding protein [Streptomyces sp. TAA204]
gi|654984058	51	49732	1	1	1	1	0.09	ABC transporter ATP-binding protein [Streptomyces sp. TAA204]
gi|490184258	56	26784	1	1	1	1	0.17	ABC transporter ATP-binding protein [Thermotoga maritima]
gi|490184258	79	26784	3	3	1	1	0.17	ABC transporter ATP-binding protein [Thermotoga maritima]
gi|490184258	57	26784	1	1	1	1	0.17	ABC transporter ATP-binding protein [Thermotoga maritima]
gi|740218026	34	31941	1	1	1	1	0.14	ABC transporter permease [Thermotoga hypogea]
gi|504188928	69	43148	7	7	1	1	0.08	ABC transporter substrate-binding protein [Blastococcus saxobsidens]
gi|503630770	40	25487	1	1	1	1	0.18	ABC transporter substrate-binding protein [Microlunatus phosphovorus]
gi|656249140	20	56053	1	1	1	1	0.06	ABC transporter substrate-binding protein [Paenibacillus alginolyticus]
gi|521062226	36	41994	1	1	1	1	0.08	ABC transporter substrate-binding protein [Thiothrix disciformis]
gi|491014814	38	57629	1	1	1	1	0.06	ABC transporter substrate-binding protein [Yersinia mollaretii]
gi|304428501	61	29916	1	1	1	1	0.15	ABC transporter, substrate-binding protein, family 3 [Streptococcus mitis ATCC 6249]
gi|512724455	14	56677	1	1	1	1	0.08	ABC-type sugar transport system, ATPase component [Chthonomonas calidirosea]
gi|1304597	56	31751	2	2	1	1	0.14	abortive phage resistance protein [Lactococcus lactis]
gi|499200447	58	71031	1	1	1	1	0.06	acetoin dehydrogenase [Bacillus halodurans]
gi|253727031	58	65209	3	3	1	1	0.05	acetolactate synthase, large subunit, biosynthetic type [Staphylococcus aureus subsp. aureus TCH130]
gi|253727031	64	65209	7	7	1	1	0.05	acetolactate synthase, large subunit, biosynthetic type [Staphylococcus aureus subsp. aureus TCH130]
gi|253727031	65	65209	5	5	1	1	0.07	acetolactate synthase, large subunit, biosynthetic type [Staphylococcus aureus subsp. aureus TCH130]
gi|253727031	49	65209	1	1	1	1	0.05	acetolactate synthase, large subunit, biosynthetic type [Staphylococcus aureus subsp. aureus TCH130]
gi|494636072	245	72027	14	14	2	2	0.14	acetyl-CoA synthetase [Psychrobacter sp. 1501(2011)]
gi|502970812	61	68880	1	1	1	1	0.06	acetyl-CoA synthetase [Ralstonia solanacearum]
gi|591276484	63	38740	1	1	1	1	0.11	acetylglutamate semialdehyde dehydrogenase [Bacillus sp. TS-2]
gi|489720477	96	97868	7	7	4	4	0.19	aconitate hydratase [Acetobacter pasteurianus]
gi|490232801	54	111912	4	4	1	1	0.04	acriflavine resistance protein B [Klebsiella oxytoca]
gi|488794514	71	8496	2	2	1	1	0.41	acyl carrier protein [Thiothrix nivea]
gi|494851741	57	59075	1	1	1	1	0.07	acyl-CoA synthetase [Patulibacter medicamentivorans]
gi|489966169	71	54215	1	1	1	1	0.06	acyl-CoA synthetase [Thermoanaerobacter ethanolicus]
gi|489966169	64	54215	1	1	1	1	0.08	acyl-CoA synthetase [Thermoanaerobacter ethanolicus]
gi|734868712	44	88446	1	1	1	1	0.05	acyl-homoserine lactone acylase subunit beta [Pseudomonas fluorescens]
gi|493324046	62	40156	1	1	1	1	0.08	acyltransferase [Prevotella bryantii]
gi|491154427	35	20247	1	1	1	1	0.17	adenylate kinase [Bordetella holmesii]
gi|655040943	7621	76005	282	282	17	17	2.00	adenylylsulfate reductase [Thiothrix lacustris]
gi|655040943	48	76005	2	2	2	2	0.09	adenylylsulfate reductase [Thiothrix lacustris]
gi|496496199	4441	75971	170	170	8	8	0.73	adenylylsulfate reductase subunit alpha [Sulfuricella denitrificans]
gi|392285482	42	39317	1	1	1	1	0.11	ADP-heptose:LPS heptosyltransferase [Frankia sp. QA3]
gi|40074272	57	153599	1	1	1	1	0.03	adventurous gliding protein Z [Myxococcus xanthus]
gi|663398328	57	39395	1	1	1	1	0.11	alcohol dehydrogenase [Streptomyces purpeofuscus]
gi|663398328	57	39395	1	1	1	1	0.11	alcohol dehydrogenase [Streptomyces purpeofuscus]
gi|501570423	56	53440	1	1	1	1	0.08	aldehyde dehydrogenase [Anoxybacillus flavithermus]
gi|497786130	53	80686	1	1	1	1	0.04	aldehyde dehydrogenase [Burkholderia ubonensis]
gi|499520282	60	57678	1	1	1	1	0.08	aldehyde dehydrogenase [Nocardia farcinica]
gi|491083632	201	35505	13	13	1	1	0.09	Aldo-keto reductase [Streptomyces mobaraensis]
gi|491083632	111	35505	8	8	1	1	0.09	Aldo-keto reductase [Streptomyces mobaraensis]
gi|491083632	97	35505	5	5	1	1	0.13	Aldo-keto reductase [Streptomyces mobaraensis]
gi|491083632	70	35505	1	1	1	1	0.13	Aldo-keto reductase [Streptomyces mobaraensis]
gi|491083632	79	35505	7	7	1	1	0.13	Aldo-keto reductase [Streptomyces mobaraensis]
gi|491083632	86	35505	2	2	1	1	0.09	Aldo-keto reductase [Streptomyces mobaraensis]
gi|491083632	79	35505	4	4	1	1	0.13	Aldo-keto reductase [Streptomyces mobaraensis]
gi|491083632	95	35505	6	6	1	1	0.13	Aldo-keto reductase [Streptomyces mobaraensis]
gi|491083632	114	35505	5	5	1	1	0.13	Aldo-keto reductase [Streptomyces mobaraensis]
gi|494919761	64	56715	1	1	1	1	0.08	alkaline phosphatase [Cellvibrio sp. BR]
gi|501382960	31	68851	1	1	1	1	0.06	alkaline phosphatase superfamily hydrolase [Elusimicrobium minutum]
gi|654751199	70	19511	1	1	1	1	0.24	alkylhydroperoxidase [Burkholderia nodosa]
gi|488808380	51	32432	1	1	1	1	0.10	alpha/beta hydrolase [Rhodobacter sphaeroides]
gi|664518514	40	28830	1	1	1	1	0.12	alpha/beta hydrolase [Streptomyces olivaceus]
gi|512725447	64	48547	1	1	1	1	0.09	Alpha-amylase/alpha-mannosidase [Chthonomonas calidirosea]
gi|491580505	33	51029	1	1	1	1	0.09	amidase [Saccharomonospora azurea]
gi|702533055	43	36239	1	1	1	1	0.12	amidinotransferase [Vibrio ordalii]
gi|663664556	48	43746	1	1	1	1	0.10	amidohydrolase [Actinocatenispora sera]
gi|657620935	53	47933	1	1	1	1	0.07	amidohydrolase [Blastococcus sp. URHD0036]
gi|492324328	40	43025	1	1	1	1	0.08	amidohydrolase family protein, partial [Desulfitobacterium hafniense]
gi|499736431	36	26584	1	1	1	1	0.13	amidophosphoribosyltransferase [Syntrophus aciditrophicus]
gi|489092005	53	32824	1	1	1	1	0.10	amino acid ABC transporter substrate-binding protein [Streptococcus parasanguinis]
gi|489092005	56	32824	1	1	1	1	0.14	amino acid ABC transporter substrate-binding protein [Streptococcus parasanguinis]
gi|655039358	328	37438	10	10	1	1	0.18	amino acid ABC transporter substrate-binding protein [Thiothrix lacustris]
gi|494515355	56	262563	1	1	1	1	0.01	Amino acid adenylation [Crocosphaera watsonii]
gi|493558992	199	102893	16	16	1	1	0.03	amino acid adenylation enzyme/thioester reductase family protein [Xenococcus sp. PCC 7305]
gi|493558992	132	102893	9	9	1	1	0.03	amino acid adenylation enzyme/thioester reductase family protein [Xenococcus sp. PCC 7305]
gi|493558992	118	102893	10	10	1	1	0.04	amino acid adenylation enzyme/thioester reductase family protein [Xenococcus sp. PCC 7305]
gi|493558992	71	102893	1	1	1	1	0.04	amino acid adenylation enzyme/thioester reductase family protein [Xenococcus sp. PCC 7305]
gi|493558992	125	102893	6	6	1	1	0.04	amino acid adenylation enzyme/thioester reductase family protein [Xenococcus sp. PCC 7305]
gi|493558992	89	102893	4	4	1	1	0.04	amino acid adenylation enzyme/thioester reductase family protein [Xenococcus sp. PCC 7305]
gi|493558992	90	102893	3	3	1	1	0.04	amino acid adenylation enzyme/thioester reductase family protein [Xenococcus sp. PCC 7305]
gi|493558992	136	102893	6	6	1	1	0.04	amino acid adenylation enzyme/thioester reductase family protein [Xenococcus sp. PCC 7305]
gi|545589350	63	53287	1	1	1	1	0.08	amino acid permease [Phascolarctobacterium sp. CAG:207]
gi|502621859	47	43115	2	2	1	1	0.10	aminotransferase class I/II [Streptobacillus moniliformis]
gi|502621859	44	43115	1	1	1	1	0.10	aminotransferase class I/II [Streptobacillus moniliformis]
gi|495477258	62	85285	1	1	1	1	0.04	aminotransferase class III [Algoriphagus machipongonensis]
gi|494044000	27	57271	1	1	1	1	0.06	AMP-binding domain protein [Cardiobacterium valvarum]
gi|494978325	64	58222	1	1	1	1	0.08	AMP-dependent synthetase [Sphingobium sp. AP49]
gi|586591130	14	35315	1	1	1	1	0.09	antigen 85-A [Nocardia seriolae N-2927]
gi|157804766	2874	68016	60	60	6	6	0.33	AprA [Thiothrix nivea DSM 5205]
gi|157804766	1346	68016	51	51	3	3	0.20	AprA [Thiothrix nivea DSM 5205]
gi|157804763	63	68812	2	2	2	2	0.10	AprA [Thiothrix sp. 12730]
gi|157804762	1598	15252	58	58	4	4	1.74	AprB [Thiothrix sp. 12730]
gi|503724961	27	56905	1	1	1	1	0.06	arabinose ABC transporter permease [Cupriavidus necator]
gi|493494959	63	33143	1	1	1	1	0.13	AraC family transcriptional regulator [Xanthomonas gardneri]
gi|499861960	66	27307	2	2	1	1	0.26	arginine ABC transporter ATP-binding protein [Sphingopyxis alaskensis]
gi|655039144	50	45163	1	1	1	1	0.07	argininosuccinate synthase [Thiothrix lacustris]
gi|660630808	39	68144	1	1	1	1	0.05	arginyl-tRNA synthetase [Anditalea andensis]
gi|489041214	72	13360	1	1	1	1	0.26	arsenate reductase [Streptococcus thermophilus]
gi|489041214	72	13360	3	3	1	1	0.36	arsenate reductase [Streptococcus thermophilus]
gi|652310214	60	44776	1	1	1	1	0.10	aspartate aminotransferase [Flavobacterium daejeonense]
gi|654941983	62	44310	1	1	1	1	0.07	aspartate kinase [Bacillus sp. FJAT-14515]
gi|494354199	103	66919	7	7	1	1	0.10	aspartyl-tRNA synthetase [Thiocapsa marina]
gi|655041744	381	55508	9	9	5	5	0.33	ATP F0F1 synthase subunit alpha [Thiothrix lacustris]
gi|110433377	80	21853	2	2	2	2	0.33	ATP synthase alpha subunit, partial [Rickettsia bellii]
gi|306996341	142	40311	3	3	3	3	0.27	ATP synthase beta subunit [Rhizobium loessense]
gi|289812825	90	16728	1	1	1	1	0.28	ATP synthase beta subunit, partial [Mesorhizobium sp. CCBAU 33182]
gi|497052497	55	35738	1	1	1	1	0.12	ATP synthase F0 subunit A [Parvimonas sp. oral taxon 393]
gi|495480355	60	12687	1	1	1	1	0.38	ATP synthase F0 subunit I [Roseobacter sp. SK209-2-6]
gi|655041746	2273	49222	70	70	12	12	1.18	ATP synthase F0F1 subunit beta [Thiothrix lacustris]
gi|655041746	784	49222	41	41	4	4	0.30	ATP synthase F0F1 subunit beta [Thiothrix lacustris]
gi|655041746	250	49222	26	26	2	2	0.19	ATP synthase F0F1 subunit beta [Thiothrix lacustris]
gi|341820747	71	54596	2	2	2	2	0.12	ATP synthase F1, alpha subunit [Weissella thailandensis fsh4-2]
gi|488797049	104	16863	5	5	1	1	0.20	ATP synthase subunit B [Thiothrix nivea]
gi|371560978	144	31211	4	4	3	3	0.35	ATP synthase subunit beta, partial [Sphingomonas sp. 038]
gi|662569812	53	77210	1	1	1	1	0.04	ATPase AAA [Chlorobium sp. GBChlB]
gi|551325456	43	51029	1	1	1	1	0.06	ATPase AAA [Pseudoalteromonas ruthenica]
gi|551325456	37	51029	1	1	1	1	0.09	ATPase AAA [Pseudoalteromonas ruthenica]
gi|654654482	30	86102	1	1	1	1	0.05	ATPase P [Ferrimonas senticii]
gi|488794957	119	38679	2	2	1	1	0.09	ATP-binding protein [Thiothrix nivea]
gi|599566689	62	99719	1	1	1	1	0.04	ATP-dependent Clp protease ATP-binding subunit ClpA [Chondromyces apiculatus DSM 436]
gi|548243061	61	68501	1	1	1	1	0.05	aTP-dependent zinc metalloprotease FtsH 3 [Blautia sp. CAG:37]
gi|457864127	58	71403	1	1	1	1	0.05	ATP-dependent Zn protease [Candidatus Phytoplasma mali]
gi|457864127	62	71403	1	1	1	1	0.06	ATP-dependent Zn protease [Candidatus Phytoplasma mali]
gi|494672416	40	119054	1	1	1	1	0.04	Bacitracin synthetase 1, partial [Paenibacillus sp. Aloe-11]
gi|11096251	87	41004	2	2	1	1	0.08	beta-ketothiolase [Ectothiorhodospira shaposhnikovii]
gi|521998821	41	47963	1	1	1	1	0.09	beta-lactamase [Actinoplanes globisporus]
gi|330981903	75	18884	1	1	1	1	0.18	binding-protein dependent transport system inner membrane protein [Pseudomonas syringae pv. aptata str. DSM 50252]
gi|503637078	60	50935	1	1	1	1	0.06	biotin attachment protein [Lacinutrix sp. 5H-3-7-4]
gi|494022086	58	28295	1	1	1	1	0.12	BON domain-containing periplasmatic protein [Desulfotignum phosphitoxidans]
gi|655039206	59	40322	1	1	1	1	0.08	branched-chain amino acid ABC transporter substrate-binding protein [Thiothrix lacustris]
gi|522047934	61	34566	2	2	1	1	0.10	branched-chain amino acid aminotransferase [Thiothrix flexilis]
gi|283480587	66	45092	1	1	1	1	0.10	butanol dehydrogenase [Thermoanaerobacter mathranii]
gi|497496997	45	26862	1	1	1	1	0.17	C4-dicarboxylate ABC transporter permease [Roseobacter sp. MED193]
gi|498010575	64	35859	1	1	1	1	0.12	C4-dicarboxylate ABC transporter substrate-binding protein [Marinobacterium stanieri]
gi|489376093	49	34780	1	1	1	1	0.13	C4-dicarboxylate ABC transporter substrate-binding protein [Pseudomonas stutzeri]
gi|511285575	62	119393	1	1	1	1	0.03	carbamoyl-phosphate synthase large chain [Burkholderia sp. RPE64]
gi|737562799	71	83014	1	1	1	1	0.05	carbohydrate-binding family V/XII [Burkholderia sacchari]
gi|671488053	39	33777	1	1	1	1	0.10	carboxylesterase [Streptomyces bicolor]
gi|488115986	52	9163	1	1	1	1	0.38	carboxymuconolactone decarboxylase [Bacillus cereus]
gi|300358019	53	78925	1	1	1	1	0.05	catecholate siderophore receptor fiu [Escherichia coli MS 198-1]
gi|488898779	65	29715	1	1	1	1	0.15	cation transporter [Nitrosococcus oceani]
gi|4519209	55	26800	1	1	1	1	0.12	cb-type cytochrome c oxidase CcoO subunit [Magnetospirillum magnetotacticum]
gi|663129671	62	57076	3	3	1	1	0.08	cell division protein [Spirillospora albida]
gi|500152779	58	199036	1	1	1	1	0.02	cell division protein FtsK [Methylibium petroleiphilum]
gi|495534264	74	40295	2	2	2	2	0.23	cell envelope biogenesis protein OmpA [Brevundimonas sp. BAL3]
gi|488797678	75	22554	1	1	1	1	0.15	cell envelope biogenesis protein OmpA [Thiothrix nivea]
gi|494485	19177	12722	373	373	5	5	9.77	Chain A, Crystal Structure And Ligand Binding Studies Of A Screened Peptide Complexed With Streptavidin
gi|50513774	50	21168	1	1	1	1	0.22	Chain A, Crystal Structure Of Protein Ypjq From Bacillus Subtilis, Pfam Duf64
gi|50513942	58	91725	1	1	1	1	0.05	Chain A, Crystal Structure Of Vibrio Proteolyticus Chitobiose Phosphorylase
gi|4929901	9841	32244	194	194	1	1	0.30	Chain A, Glutathione S-transferase Fused With The Nuclear Matrix Targeting Signal Of The Transcription Factor Aml-1
gi|4929901	4055	32244	161	161	1	1	0.30	Chain A, Glutathione S-transferase Fused With The Nuclear Matrix Targeting Signal Of The Transcription Factor Aml-1
gi|145579532	134	34301	36	36	2	2	0.28	Chain A, High Resolution Structure Of E. Coli GlucoseGALACTOSE Binding Protein Bound With Glucose
gi|66361223	101	14852	3	3	1	1	0.23	Chain A, Nmr Structure Of Allochromatium Vinosum Dsrc: Northeast Structural Genomics Consortium Target Op4
gi|5822002	126	15051	4	4	4	4	1.25	Chain A, Profilin Binds Proline-Rich Ligands In Two Distinct Amide Backbone Orientations
gi|5822002	50	15051	1	1	1	1	0.32	Chain A, Profilin Binds Proline-Rich Ligands In Two Distinct Amide Backbone Orientations
gi|225733897	41	18808	2	2	1	1	0.25	Chain A, Solution Structure Of E.Coli Slyd
gi|34809976	10704	13278	232	232	5	5	8.81	Chain A, Streptavidin Mutant N23e At 1.96a
gi|20664188	152	26142	4	4	1	1	0.17	Chain A, Structure Of Rsua
gi|20664188	81	26142	3	3	1	1	0.17	Chain A, Structure Of Rsua
gi|82408081	11383	16547	273	273	5	5	5.44	Chain A, T7-Tagged Full-Length Streptavidin
gi|33358169	130	16303	3	3	1	1	0.21	Chain A, The 1.8 Angstrom Structure Of Calmodulin Rs20 Peptide Complex
gi|2194019	10548	13323	232	232	5	5	8.81	Chain B, Complex Between Streptavidin And The Strep-Tag Ii Peptide
gi|496454985	52	93455	2	2	1	1	0.05	chaperone protein ClpB 1 [Pyramidobacter piscolens]
gi|547905142	213	68982	4	4	3	3	0.20	chaperone protein DnaK [Alistipes sp. CAG:268]
gi|488701587	113	65318	1	1	1	1	0.05	Chaperone protein DnaK [Cystobacter fuscus]
gi|695811113	77	72466	2	2	2	2	0.09	chaperone protein HtpG [Bacillus subtilis]
gi|678287365	113	72798	4	4	2	2	0.14	Chaperone protein HtpG [Bacillus thermoamylovorans]
gi|547929134	107	73695	2	2	2	2	0.09	chaperone protein HtpG [Firmicutes bacterium CAG:345]
gi|672710204	1829	28986	44	44	3	3	0.55	chaperonin, partial [Luteimonas sp. 4284/11]
gi|197259398	63	19874	2	2	1	1	0.17	chaperonin-60, partial [uncultured bacterium]
gi|655039177	235	20267	14	14	1	1	0.17	chemical-damaging agent resistance protein C [Thiothrix lacustris]
gi|655039177	50	20267	2	2	1	1	0.23	chemical-damaging agent resistance protein C [Thiothrix lacustris]
gi|647405285	48	76711	1	1	1	1	0.04	chemotaxis protein [Sporosarcina sp. D27]
gi|547835446	70	17433	1	1	1	1	0.27	chemotaxis signal transduction protein [Roseburia sp. CAG:45]
gi|651325584	38	39461	1	1	1	1	0.11	chorismate synthase [Aequorivita capsosiphonis]
gi|501383018	60	129577	1	1	1	1	0.03	chromosome segregation ATPase [Elusimicrobium minutum]
gi|652375423	60	135845	1	1	1	1	0.03	chromosome segregation protein SMC [Sediminibacillus halophilus]
gi|547963282	60	173259	1	1	1	1	0.02	coA-substrate-specific enzyme activase [Eggerthella sp. CAG:298]
gi|505074040	62	28292	1	1	1	1	0.12	cobalt ABC transporter ATP-binding protein [Desulfitobacterium dichloroeliminans]
gi|635295296	57	28911	1	1	1	1	0.12	Cointegrate resolution protein T [Pseudomonas putida]
gi|594835799	77	71201	1	1	1	1	0.05	cold-shock DEAD-box protein A [Nonlabens marinus S1-08]
gi|490021210	62	61667	1	1	1	1	0.05	cold-shock protein [Mycobacterium thermoresistibile]
gi|489391568	60	89952	1	1	1	1	0.05	conjugal transfer ATPase TrbE [Pseudomonas stutzeri]
gi|504827488	58	73442	1	1	1	1	0.04	conjugal transfer protein TraG [Acidovorax sp. KKS102]
gi|504827488	60	73442	1	1	1	1	0.06	conjugal transfer protein TraG [Acidovorax sp. KKS102]
gi|446487916	51	68179	1	1	1	1	0.06	conjugal transfer protein TraG [Streptococcus agalactiae]
gi|49180008	59	31789	1	1	1	1	0.10	conserved hypothetical protein [Bacillus anthracis str. Sterne]
gi|315931231	19	39737	1	1	1	1	0.11	conserved hypothetical protein [Campylobacter jejuni subsp. jejuni 327]
gi|256955771	57	16471	1	1	1	1	0.29	conserved hypothetical protein [Enterococcus faecalis HIP11704]
gi|258600422	57	81349	1	1	1	1	0.04	conserved hypothetical protein [Listeria monocytogenes FSL N3-165]
gi|508730167	64	27281	1	1	1	1	0.17	conserved hypothetical protein [Oleispira antarctica RB-8]
gi|269832063	58	13303	1	1	1	1	0.36	conserved hypothetical protein [Vibrio harveyi 1DA3]
gi|251773298	67	91027	1	1	1	1	0.04	conserved protein of unknown function [Leptospirillum ferrodiazotrophum]
gi|659868130	45	49294	1	1	1	1	0.09	coproporphyrinogen III oxidase [Caulobacter sp. UNC358MFTsu5.1]
gi|511538427	50	50855	1	1	1	1	0.09	CRISPR type I-f/ypest-associated protein csy2 [Bilophila wadsworthia]
gi|491168424	64	61878	2	2	1	1	0.05	CTP synthetase [Bilophila wadsworthia]
gi|489720367	65	316398	2	2	1	1	0.01	cyclic beta 1-2 glucan synthetase [Acetobacter pasteurianus]
gi|489720367	70	316398	1	1	1	1	0.01	cyclic beta 1-2 glucan synthetase [Acetobacter pasteurianus]
gi|652394670	30	41814	1	1	1	1	0.08	cystathionine gamma-synthase [Pleomorphomonas oryzae]
gi|639727669	47	41676	1	1	1	1	0.11	cysteine desulfurase [Clostridiales bacterium VE202-07]
gi|653089091	54	32030	1	1	1	1	0.14	cysteine synthase [Halonatronum saccharophilum]
gi|489609328	57	33378	2	2	1	1	0.13	cysteine synthase [Ruminiclostridium thermocellum]
gi|493975388	67	47834	1	1	1	1	0.07	cytochrome bd-type quinol oxidase, subunit 1 [Desulfovibrio magneticus]
gi|657198419	40	37754	1	1	1	1	0.12	cytochrome O ubiquinol oxidase [Aeromonas caviae]
gi|503190589	20	46019	1	1	1	1	0.10	cytochrome P450 [Frankia sp. EuI1c]
gi|664433299	44	44942	1	1	1	1	0.07	cytochrome P450 [Streptomyces sp. NRRL F-5140]
gi|503867762	55	54010	1	1	1	1	0.06	cytosol aminopeptidase [Micavibrio aeruginosavorus]
gi|407000686	68	17109	1	1	1	1	0.20	dATP pyrophosphohydrolase [uncultured bacterium]
gi|492647190	59	23310	1	1	1	1	0.20	dCTP deaminase [Fusobacterium nucleatum]
gi|492623702	61	43654	1	1	1	1	0.08	DEAD box family ATP-dependent RNA helicase [Aeromonas molluscorum]
gi|519014176	38	74649	1	1	1	1	0.04	DEAD/DEAH box helicase [Gordonia polyisoprenivorans]
gi|497268294	60	60018	1	1	1	1	0.07	Delta-1-pyrroline-5-carboxylate dehydrogenase [Fulvivirga imtechensis]
gi|497268294	61	60018	1	1	1	1	0.05	Delta-1-pyrroline-5-carboxylate dehydrogenase [Fulvivirga imtechensis]
gi|497268294	65	60018	1	1	1	1	0.07	Delta-1-pyrroline-5-carboxylate dehydrogenase [Fulvivirga imtechensis]
gi|491486119	65	27965	1	1	1	1	0.16	DeoR family transcriptional regulator [[Eubacterium] hallii]
gi|502779839	73	31381	1	1	1	1	0.11	DeoR family transcriptional regulator [Meiothermus ruber]
Accession	Score	Mass	Matches	Pep(sig)	Sequences	Seq(sig)	emPAI	Description
gi|488661951	59	72650	1	1	1	1	0.05	diguanylate cyclase (GGDEF) domain-containing protein [[Clostridium] clostridioforme]
gi|493969775	55	43851	1	1	1	1	0.10	diguanylate cyclase [Salinisphaera shabanensis]
gi|489014058	59	45079	1	1	1	1	0.07	dihydroorotase [Streptococcus sanguinis]
gi|655038933	72	49070	1	1	1	1	0.07	dihydroorotase [Thiothrix lacustris]
gi|584421873	60	30973	1	1	1	1	0.11	dihydropteroate synthase [Pseudoalteromonas lipolytica SCSIO 04301]
gi|584421873	60	30973	1	1	1	1	0.11	dihydropteroate synthase [Pseudoalteromonas lipolytica SCSIO 04301]
gi|565879659	25	54491	1	1	1	1	0.08	dihydropyrimidine dehydrogenase subunit A [Williamsia sp. D3]
gi|494466180	58	47865	2	2	1	1	0.09	dihydropyrimidine dehydrogenase subunit B [Oceanicola granulosus]
gi|496290787	71	59197	1	1	1	1	0.07	dihydroxy-acid dehydratase [Clostridium sp. D5]
gi|487912179	62	5338	1	1	1	1	0.68	dimethyladenosine transferase [Bacillus cereus]
gi|487912179	75	5338	1	1	1	1	1.10	dimethyladenosine transferase [Bacillus cereus]
gi|494084383	58	45962	1	1	1	1	0.07	D-inositol 3-phosphate glycosyltransferase [Saccharomonospora paurometabolica]
gi|543536940	46	56104	1	1	1	1	0.06	DNA gyrase subunit A [Crocosphaera watsonii WH 0402]
gi|295979547	44	35522	1	1	1	1	0.13	DNA gyrase subunit B [Asticcacaulis biprosthecium]
gi|664218505	59	65918	1	1	1	1	0.07	DNA helicase [Streptomyces sp. NRRL S-31]
gi|495411553	55	108191	1	1	1	1	0.04	DNA helicase IV [Pseudoalteromonas sp. BSi20495]
gi|501383826	64	72306	2	2	1	1	0.06	DNA ligase [Elusimicrobium minutum]
gi|490204852	58	100029	1	1	1	1	0.04	DNA methylase [Thermosipho africanus]
gi|491643399	70	103135	2	2	1	1	0.03	DNA polymerase I [Grimontia hollisae]
gi|491643399	60	103135	1	1	1	1	0.04	DNA polymerase I [Grimontia hollisae]
gi|640623421	58	13161	3	3	1	1	0.37	DNA polymerase III subunit gamma/tau [Sulfitobacter sp. NB-68]
gi|498448441	56	50319	1	1	1	1	0.09	DNA polymerase V [Enterococcus asini]
gi|516210426	58	46915	1	1	1	1	0.07	DNA repair ATPase [Nocardiopsis salina]
gi|656077079	75	41405	1	1	1	1	0.11	DNA repair exonuclease [Mycobacterium sp. URHD0025]
gi|657660956	34	14045	1	1	1	1	0.24	DNA repair protein [Chitinophaga sp. JGI 0001002-D04]
gi|503786135	68	50891	1	1	1	1	0.09	DNA repair protein RadA [Cyclobacterium marinum]
gi|406929843	56	40619	1	1	1	1	0.08	DNA replication and repair protein recF [uncultured bacterium]
gi|497048507	60	14750	1	1	1	1	0.32	DNA sulfur modification protein DndE [Lachnospiraceae bacterium oral taxon 082]
gi|516384271	63	72513	1	1	1	1	0.05	DNA topoisomerase IV subunit B [Burkholderia kururiensis]
gi|497812479	66	72451	1	1	1	1	0.06	DNA topoisomerase IV subunit B [Sphingomonas sp. KC8]
gi|503388125	55	14027	1	1	1	1	0.34	DNA-binding domain-containing protein [Cellulophaga lytica]
gi|493234245	57	15012	1	1	1	1	0.23	DNA-binding protein [Paenibacillus vortex]
gi|635657280	58	34923	1	1	1	1	0.09	DNA-binding protein [Pseudogulbenkiania sp. MAI-1]
gi|496436674	56	75810	1	1	1	1	0.06	DNA-cytosine methyltransferase [Phascolarctobacterium succinatutens]
gi|325529729	150	153449	6	6	2	2	0.04	DNA-directed RNA polymerase subunit beta [Burkholderia sp. TJI49]
gi|489089126	54	140200	1	1	1	1	0.03	DNA-directed RNA polymerase subunit beta' [Streptococcus downei]
gi|490742245	71	30913	1	1	1	1	0.15	DnaJ-class molecular chaperone with C-terminal Zn finger domain [[Eubacterium] cellulosolvens]
gi|546466735	54	28146	1	1	1	1	0.16	dolichol-phosphate mannosyltransferase [Eubacterium sp. CAG:86]
gi|546466735	60	28146	1	1	1	1	0.16	dolichol-phosphate mannosyltransferase [Eubacterium sp. CAG:86]
gi|344172562	63	26168	1	1	1	1	0.17	D-ribulose-5-phosphate 3-epimerase [Ralstonia syzygii R24]
gi|490522940	65	36927	1	1	1	1	0.09	DSBA oxidoreductase [Cronobacter sakazakii]
gi|63099942	70	674888	1	1	1	1		DszB [Sorangium cellulosum]
gi|550658788	49	86317	1	1	1	1	0.05	efflux transporter [Chitinivibrio alkaliphilus]
gi|187453124	47	42917	1	1	1	1	0.08	elongation factor EF-Tu [Candidatus Phytoplasma vitis]
gi|651256847	58	76739	1	1	1	1	0.04	elongation factor G [Acholeplasma axanthum]
gi|488796776	84	76773	2	2	1	1	0.04	elongation factor P [Thiothrix nivea]
gi|655039371	82	30582	2	2	1	1	0.11	elongation factor Ts [Thiothrix lacustris]
gi|655039371	85	30582	1	1	1	1	0.15	elongation factor Ts [Thiothrix lacustris]
gi|522050054	189	43079	2	2	1	1	0.08	elongation factor Tu [Thiothrix flexilis]
gi|522050054	116	43079	1	1	1	1	0.08	elongation factor Tu [Thiothrix flexilis]
gi|655040451	501	43259	17	17	3	3	0.25	elongation factor Tu [Thiothrix lacustris]
gi|655040451	145	43259	3	3	1	1	0.08	elongation factor Tu [Thiothrix lacustris]
gi|488797303	225	43429	6	6	2	2	0.16	elongation factor Tu [Thiothrix nivea]
gi|385259137	40	28842	1	1	1	1	0.16	elongation factor Tu, partial [Campylobacter coli]
gi|640656720	63	24065	2	2	1	1	0.19	endonuclease III [Lactobacillus fuchuensis]
gi|737650586	38	45889	1	1	1	1	0.10	endoribonuclease L-PSP [Flavobacterium hydatis]
gi|690583218	1132	27016	22	22	8	8	3.04	enhanced green fluorescent protein [Mycobacterium tuberculosis]
gi|226366	93	50097	2	2	2	2	0.14	enolase
gi|551289410	85	45240	2	2	1	1	0.15	enolase [Aestuariimicrobium kwangyangense]
gi|496509619	64	46591	1	1	1	1	0.07	enolase [Bacteroidetes oral taxon 274]
gi|503473426	58	46454	1	1	1	1	0.09	enolase [Coriobacterium glomerans]
gi|550924298	49	45816	2	2	1	1	0.07	enolase [Sphingopyxis baekryungensis]
gi|655039462	104	45249	1	1	1	1	0.07	enolase [Thiothrix lacustris]
gi|505207355	127	47163	1	1	1	1	0.07	enolase Eno [Clostridium saccharoperbutylacetonicum]
gi|505207355	104	47163	1	1	1	1	0.09	enolase Eno [Clostridium saccharoperbutylacetonicum]
gi|502840917	59	24342	1	1	1	1	0.19	ErfK/YbiS/YcfS/YnhG family protein [Kyrpidia tusciae]
gi|664350596	48	50892	1	1	1	1	0.09	erythritol kinase [Streptomyces sp. NRRL S-1868]
gi|496376647	58	68484	1	1	1	1	0.05	excinuclease ABC subunit C [Elizabethkingia anophelis]
gi|431789170	74	97070	5	5	1	1	0.04	Exonuclease SbcC [Yersinia enterocolitica IP 10393]
gi|431789170	78	97070	3	3	1	1	0.04	Exonuclease SbcC [Yersinia enterocolitica IP 10393]
gi|431789170	67	97070	1	1	1	1	0.04	Exonuclease SbcC [Yersinia enterocolitica IP 10393]
gi|491321484	127	97070	8	8	1	1	0.03	Exonuclease SbcC [Yersinia enterocolitica]
gi|491321484	102	97070	8	8	1	1	0.03	Exonuclease SbcC [Yersinia enterocolitica]
gi|491321484	112	97070	7	7	1	1	0.04	Exonuclease SbcC [Yersinia enterocolitica]
gi|491321484	66	97070	1	1	1	1	0.03	Exonuclease SbcC [Yersinia enterocolitica]
gi|491321484	69	97070	1	1	1	1	0.04	Exonuclease SbcC [Yersinia enterocolitica]
gi|504277717	48	54912	1	1	1	1	0.06	exopolyphosphatase [Alicyclobacillus acidocaldarius]
gi|307829331	63	94192	1	1	1	1	0.03	extracellular alpha-amylase precursor [Thermotoga neapolitana DSM 4359]
gi|504366171	55	47540	2	2	1	1	0.07	extracellular solute-binding protein [Halanaerobium praevalens]
gi|503700152	52	55322	1	1	1	1	0.08	F0F1 ATP synthase subunit alpha [Zymomonas mobilis]
gi|515521451	60	50064	4	4	2	2	0.14	F0F1 ATP synthase subunit beta [Catenovulum agarivorans]
gi|496434985	58	50942	1	1	1	1	0.09	F0F1 ATP synthase subunit beta [Succinatimonas hippei]
gi|517333831	126	49675	7	7	4	4	0.29	F0F1 ATP synthase subunit beta [Thiobacillus thioparus]
gi|488797053	1064	49159	39	39	8	8	0.68	F0F1 ATP synthase subunit beta [Thiothrix nivea]
gi|488794285	148	46944	1	1	1	1	0.07	FAD-dependent pyridine nucleotide-disulfide oxidoreductase [Thiothrix nivea]
gi|488794285	60	46944	1	1	1	1	0.09	FAD-dependent pyridine nucleotide-disulfide oxidoreductase [Thiothrix nivea]
gi|488794285	116	46944	1	1	1	1	0.07	FAD-dependent pyridine nucleotide-disulfide oxidoreductase [Thiothrix nivea]
gi|654647936	43	103884	1	1	1	1	0.04	FAD-linked oxidase [Ferrimonas futtsuensis]
gi|736911586	113	17586	4	4	2	2	0.61	ferric uptake regulator [Gilliamella apicola]
gi|503544468	58	67830	1	1	1	1	0.05	fibronectin-binding protein [Tepidanaerobacter acetatoxydans]
gi|550913435	65	53300	1	1	1	1	0.08	Fis family transcriptional regulator [Desulfospira joergensenii]
gi|503533536	68	68900	1	1	1	1	0.05	Fis family transcriptional regulator [Haliscomenobacter hydrossis]
gi|655041057	42	8865	1	1	1	1	0.39	Fis family transcriptional regulator [Thiothrix lacustris]
gi|499954683	56	41651	1	1	1	1	0.11	flagellar biosynthesis protein FlhB [Nitrosomonas eutropha]
gi|499954683	63	41651	1	1	1	1	0.11	flagellar biosynthesis protein FlhB [Nitrosomonas eutropha]
gi|499729170	69	60321	1	1	1	1	0.05	flagellar hook-associated protein FlgK [Sodalis glossinidius]
gi|499729170	67	60321	1	1	1	1	0.07	flagellar hook-associated protein FlgK [Sodalis glossinidius]
gi|501283900	57	60879	1	1	1	1	0.05	formate--tetrahydrofolate ligase [Shewanella woodyi]
gi|488796710	22	36823	1	1	1	1	0.09	fructose-1 6-bisphosphatase [Thiothrix nivea]
gi|976366	182	37615	10	10	1	1	0.09	fructose-1,6-bisphosphate aldolase [Ralstonia eutropha H16]
gi|655039526	425	38413	20	20	5	5	0.51	fructose-1,6-bisphosphate aldolase [Thiothrix lacustris]
gi|654943247	24	30867	2	2	1	1	0.11	fructose-bisphosphate aldolase [Bacillus sp. FJAT-14515]
gi|654943247	20	30867	2	2	1	1	0.11	fructose-bisphosphate aldolase [Bacillus sp. FJAT-14515]
gi|499963807	79	37618	1	1	1	1	0.09	fructose-bisphosphate aldolase [Maricaulis maris]
gi|488796604	424	38517	20	20	4	4	0.39	fructose-bisphosphate aldolase [Thiothrix nivea]
gi|692534809	61	7974	1	1	1	1	0.44	fructose-bisphosphate aldolase, partial [Acinetobacter sp. MII]
gi|544643385	71	38952	1	1	1	1	0.11	F-type H+-transporting ATPase subunit B [Bradyrhizobium sp. DFCI-1]
gi|147656	125	20640	2	2	1	1	0.22	g20.3 [Escherichia coli]
gi|654845023	58	59852	1	1	1	1	0.07	gamma-glutamyltranspeptidase [Olivibacter sitiensis]
gi|344167364	58	26879	2	2	1	1	0.17	Gcn5-related n-acetyltransferase protein (modular protein) [blood disease bacterium R229]
gi|499128455	129	20754	3	3	1	1	0.16	general stress protein 16U (GSP16U) [Lysinibacillus sphaericus]
gi|499128455	254	20754	9	9	1	1	0.16	general stress protein 16U (GSP16U) [Lysinibacillus sphaericus]
gi|499128455	101	20754	1	1	1	1	0.22	general stress protein 16U (GSP16U) [Lysinibacillus sphaericus]
gi|493687108	57	44814	1	1	1	1	0.07	Ger(x)C family germination protein [Bacillus sonorensis]
gi|326625137	60	72122	1	1	1	1	0.06	ggdef domain/eal domain protein [Salmonella enterica subsp. enterica serovar Dublin str. SD3246]
gi|651297603	62	34581	2	2	1	1	0.13	glmZ(sRNA)-inactivating NTPase [Actinobaculum schaalii]
gi|651297603	63	34581	2	2	1	1	0.13	glmZ(sRNA)-inactivating NTPase [Actinobaculum schaalii]
gi|84375133	126	36623	8	8	1	1	0.12	gluconate utilization system Gnt-I transcriptional repressor [Vibrio splendidus 12B01]
gi|84375133	97	36623	5	5	1	1	0.12	gluconate utilization system Gnt-I transcriptional repressor [Vibrio splendidus 12B01]
gi|493552111	61	41131	1	1	1	1	0.08	glucose-1-phosphate adenylyltransferase [Catenibacterium mitsuokai]
gi|488797747	511	72168	11	11	2	2	0.14	glutamate synthase [Thiothrix nivea]
gi|488798143	90	167829	2	2	1	1	0.02	glutamate synthase [Thiothrix nivea]
gi|488796341	40	45899	1	1	1	1	0.07	glutamate-1-semialdehyde 2,1-aminomutase [Thiothrix nivea]
gi|740842104	46	28217	1	1	1	1	0.16	glutamine amidotransferase [Corynebacterium sp. ATCC 6931]
gi|149832	29	52000	1	1	1	1	0.08	glutamine synthetase (EC 6.3.1.2) [Methylococcus capsulatus]
gi|651967504	171	52022	2	2	1	1	0.13	glutamine synthetase [Azovibrio restrictus]
gi|651967504	164	52022	2	2	1	1	0.08	glutamine synthetase [Azovibrio restrictus]
gi|517109979	262	52460	3	3	1	1	0.20	glutamine synthetase [Fangia hongkongensis]
gi|517109979	157	52460	1	1	1	1	0.08	glutamine synthetase [Fangia hongkongensis]
gi|651615534	69	52426	3	3	2	2	0.13	glutamine synthetase [Methylocaldum szegediense]
gi|655039650	3957	52273	132	132	8	8	1.08	glutamine synthetase [Thiothrix lacustris]
gi|655039650	769	52273	39	39	7	7	0.73	glutamine synthetase [Thiothrix lacustris]
gi|655039650	103	52273	2	2	2	2	0.17	glutamine synthetase [Thiothrix lacustris]
gi|2895904	62	77269	4	4	1	1	0.06	glutamine synthetase type III [Ruminococcus flavefaciens FD-1]
gi|152069958	88	15643	2	2	1	1	0.48	glutamine synthetase, type I [Beggiatoa sp. PS]
gi|571794340	64	66143	1	1	1	1	0.05	Glutaminyl-tRNA synthetase [Candidatus Magnetoglobus multicellularis str. Araruama]
gi|671471672	64	35158	1	1	1	1	0.13	glutamyl-Q tRNA(Asp) ligase [Eubacterium desmolans]
gi|655125496	69	53198	1	1	1	1	0.08	glutamyl-tRNA amidotransferase [Desulfonatronum lacustre]
gi|488797149	78	52435	2	2	1	1	0.06	glutamyl-tRNA amidotransferase subunit B [Thiothrix nivea]
gi|493143833	104	27030	6	6	1	1	0.12	glutathione amide-dependent peroxidase [Cupriavidus basilensis]
gi|488797091	694	27215	13	13	3	3	0.59	glutathione amide-dependent peroxidase [Thiothrix nivea]
gi|493179020	57	48749	1	1	1	1	0.07	glutathione reductase [Enterobacter cancerogenus]
gi|493179020	57	48749	1	1	1	1	0.09	glutathione reductase [Enterobacter cancerogenus]
gi|1098567	71	31877	2	2	1	1	0.10	glyceraldehyde 3-phosphate dehydrogenase, partial [Bacteroides fragilis]
gi|493468520	87	35802	1	1	1	1	0.09	glyceraldehyde-3-phosphate dehydrogenase [delta proteobacterium NaphS2]
gi|493468520	105	35802	2	2	1	1	0.12	glyceraldehyde-3-phosphate dehydrogenase [delta proteobacterium NaphS2]
gi|554670252	61	36414	2	2	2	2	0.19	glyceraldehyde-3-phosphate dehydrogenase [Gloeobacter kilaueensis]
gi|499629939	280	36257	11	11	4	4	0.42	glyceraldehyde-3-phosphate dehydrogenase [Thiobacillus denitrificans]
gi|655039523	516	35721	22	22	5	5	0.56	glyceraldehyde-3-phosphate dehydrogenase [Thiothrix lacustris]
gi|464808482	62	35984	1	1	1	1	0.09	glyceraldehyde-3-phosphate dehydrogenase, type I [Gordonia sp. NB4-1Y]
gi|491890027	29	34055	1	1	1	1	0.10	glycerophosphodiester phosphodiesterase [Bacteroides stercoris]
gi|503090380	47	42118	1	1	1	1	0.08	glycerophosphoryl diester phosphodiesterase [Cyanothece sp. PCC 7822]
gi|503316599	54	92968	2	2	1	1	0.04	glycoside hydrolase [Cellulophaga algicola]
gi|492472832	55	97728	1	1	1	1	0.03	glycoside hydrolase [Parabacteroides distasonis]
gi|489126129	52	78726	1	1	1	1	0.06	glycosyl hydrolase family 2, sugar binding domain protein [Streptococcus anginosus]
gi|653187765	42	84731	1	1	1	1	0.04	glycosyl hydrolase family 3 [Lachnospiraceae bacterium AC3007]
gi|498119657	32	41260	1	1	1	1	0.08	glycosyl transferase [Vibrio cyclitrophicus]
gi|498119657	55	41260	1	1	1	1	0.11	glycosyl transferase [Vibrio cyclitrophicus]
gi|502779298	56	41246	1	1	1	1	0.11	glycosyl transferase family 1 [Meiothermus ruber]
gi|407001938	50	37379	1	1	1	1	0.09	glycosyl transferase group 1 protein, partial [uncultured bacterium]
gi|313614536	63	90402	3	3	1	1	0.04	glycosyl transferase, group 2 family protein [Listeria marthii FSL S4-120]
gi|254672472	61	61246	1	1	1	1	0.05	GMP synthase [Neisseria meningitidis alpha275]
gi|490746134	39	19057	1	1	1	1	0.18	GNAT family acetyltransferase [[Clostridium] scindens]
gi|489225552	48	19729	1	1	1	1	0.23	GNAT family acetyltransferase [Lactococcus garvieae]
gi|493643060	49	23801	1	1	1	1	0.14	GntR family transcriptional regulator [Kineosphaera limosa]
gi|691637706	61	52286	1	1	1	1	0.08	GntR family transcriptional regulator [Massilia sp. JS1662]
gi|494066813	63	27800	1	1	1	1	0.12	GntR family transcriptional regulator [Nitratireductor aquibiodomus]
gi|23096062	49	58070	4	4	1	1	0.08	groEL [Acetobacter aceti]
gi|38532120	61	55661	1	1	1	1	0.08	GroEL [Buchnera aphidicola (Uroleucon obscurum)]
gi|560221299	284	28859	6	6	1	1	0.12	GroEL protein, partial [uncultured gamma proteobacterium]
gi|560221299	110	28859	2	2	1	1	0.12	GroEL protein, partial [uncultured gamma proteobacterium]
gi|238773812	1859	56385	82	82	4	4	0.57	GroEL, partial [Candidatus Puchtella pedicinophila]
gi|153798380	85	36933	2	2	1	1	0.12	GroES-like protein [Actinomyces odontolyticus ATCC 17982]
gi|684048216	1951	57615	90	90	5	5	0.65	GroL, Chaperonin GroEL (HSP60 family) [Thiobacillus prosperus]
gi|502780494	58	43816	1	1	1	1	0.08	group 1 glycosyl transferase [Stackebrandtia nassauensis]
gi|686552115	50	72639	1	1	1	1	0.05	GTP-binding protein [Paenibacillus stellifer]
gi|488797009	152	68104	4	4	1	1	0.10	GTP-binding protein TypA [Thiothrix nivea]
gi|41639	57	97462	1	1	1	1	0.03	gyrase alpha subunit [Escherichia coli]
gi|503054342	59	28837	1	1	1	1	0.16	haloacid dehalogenase [Micromonospora aurantiaca]
gi|503054342	60	28837	1	1	1	1	0.16	haloacid dehalogenase [Micromonospora aurantiaca]
gi|503823017	73	157958	1	1	1	1	0.02	haloacid dehalogenase [Streptomyces violaceusniger]
gi|566128883	56	85865	1	1	1	1	0.04	HAMP domain protein [Bordetella pertussis]
gi|151243	63	57252	1	1	1	1	0.08	heat shock protein [Pseudomonas aeruginosa]
gi|523509669	58	15271	1	1	1	1	0.22	heat shock protein 65, partial [uncultured Mycobacterium sp.]
gi|144115	89	67897	1	1	1	1	0.06	heat shock protein 70 [Brucella ovis]
gi|2072520	85	66939	1	1	1	1	0.05	heat shock protein 70 [Helicobacter pylori]
gi|493552067	68	74204	2	2	1	1	0.09	heat shock protein 90 [Catenibacterium mitsuokai]
gi|488690791	113	72555	1	1	1	1	0.05	heat shock protein 90 [Stigmatella aurantiaca]
gi|404270540	108	48430	1	1	1	1	0.09	heat shock protein 90, partial [Bradyrhizobium sp. CCGE-LA001]
gi|1628635	32	52416	1	1	1	1	0.06	heat shock protein DnaK, partial [Leptospira interrogans]
gi|551033911	57	95121	1	1	1	1	0.05	helicase [Butyrivibrio sp. AE3009]
gi|651404873	58	95432	2	2	1	1	0.05	helicase [Butyrivibrio sp. MC2021]
gi|500005570	77	25415	2	2	2	2	0.39	heme-binding protein [Candidatus Solibacter usitatus]
gi|500005570	86	25415	2	2	2	2	0.39	heme-binding protein [Candidatus Solibacter usitatus]
gi|499403170	58	50143	1	1	1	1	0.09	hemolysin secretion protein D [Bradyrhizobium diazoefficiens]
gi|488796255	66	80479	2	2	2	2	0.08	heterodisulfide reductase [Thiothrix nivea]
gi|506371791	60	50126	1	1	1	1	0.09	histidine kinase [Brevibacillus brevis]
gi|653635999	52	68296	1	1	1	1	0.05	histidine kinase [Clostridium cadaveris]
gi|647319282	43	39612	2	2	1	1	0.11	histidine kinase [Enterobacter cloacae]
gi|498506604	68	36578	1	1	1	1	0.09	histone deacetylase [Pandoraea sp. SD6-2]
gi|497869475	42	36994	1	1	1	1	0.09	HrcA family transcriptional regulator [Sphingomonas sp. PAMC 26605]
gi|611110802	67	16205	1	1	1	1	0.21	hsp70 family protein, partial [Escherichia coli 1-176-05_S1_C2]
gi|535709	97	8995	1	1	1	1	0.57	HU protein [Pseudomonas aeruginosa]
gi|495525426	29	39777	1	1	1	1	0.11	hyaluronidase [gamma proteobacterium BDW918]
gi|664421412	37	32146	1	1	1	1	0.14	hydrolase [Streptomyces sp. NRRL F-5140]
gi|647531474	46	79500	1	1	1	1	0.04	hydroperoxidase [Shewanella marina]
gi|501489634	72	33109	1	1	1	1	0.14	hypothetical lipoprotein [Mycoplasma arthritidis]
gi|737152389	43	49183	1	1	1	1	0.09	hypothetical protein [[Clostridium] viride]
gi|651252842	37	41261	1	1	1	1	0.08	hypothetical protein [Acidobacteria bacterium KBS 146]
gi|522211514	63	16649	1	1	1	1	0.20	hypothetical protein [Acidobacteriaceae bacterium KBS 96]
gi|446436369	59	31095	1	1	1	1	0.14	hypothetical protein [Acinetobacter baumannii]
gi|491046114	47	19360	1	1	1	1	0.24	hypothetical protein [Acinetobacter junii]
gi|517034508	61	24731	1	1	1	1	0.18	hypothetical protein [actinobacterium SCGC AAA278-I18]
gi|640497569	55	44876	1	1	1	1	0.07	hypothetical protein [Actinomadura madurae]
gi|545316405	57	34853	1	1	1	1	0.13	hypothetical protein [Actinomadura madurae]
gi|512548630	58	22361	1	1	1	1	0.15	hypothetical protein [Actinomyces europaeus]
gi|651273719	20	67951	1	1	1	1	0.06	hypothetical protein [Actinomyces gerencseriae]
gi|545353293	28	11297	1	1	1	1	0.30	hypothetical protein [Actinomyces sp. oral taxon 877]
gi|517141814	44	44669	2	2	1	1	0.07	hypothetical protein [Actinomycetospora chiangmaiensis]
gi|517141814	41	44669	1	1	1	1	0.10	hypothetical protein [Actinomycetospora chiangmaiensis]
gi|556601695	58	38848	2	2	1	1	0.09	hypothetical protein [Actinoplanes friuliensis]
gi|556601695	63	38848	2	2	1	1	0.11	hypothetical protein [Actinoplanes friuliensis]
gi|556601695	59	38848	1	1	1	1	0.09	hypothetical protein [Actinoplanes friuliensis]
gi|556601695	57	38848	1	1	1	1	0.11	hypothetical protein [Actinoplanes friuliensis]
gi|556601695	59	38848	1	1	1	1	0.11	hypothetical protein [Actinoplanes friuliensis]
gi|736133722	74	9371	1	1	1	1	0.55	hypothetical protein [Actinospica robiniae]
gi|517522834	66	90974	1	1	1	1	0.05	hypothetical protein [Algicola sagamiensis]
gi|692417254	46	20700	1	1	1	1	0.22	hypothetical protein [Alistipes sp. AL-1]
gi|517488460	69	19719	1	1	1	1	0.23	hypothetical protein [Allofustis seminis]
gi|640275080	57	13491	1	1	1	1	0.36	hypothetical protein [Aminobacter sp. J41]
gi|522121646	61	21765	1	1	1	1	0.21	hypothetical protein [Amycolatopsis alba]
gi|522155496	75	26627	3	3	1	1	0.13	hypothetical protein [Amycolatopsis nigrescens]
gi|522155496	60	26627	2	2	1	1	0.17	hypothetical protein [Amycolatopsis nigrescens]
gi|522155496	84	26627	2	2	1	1	0.13	hypothetical protein [Amycolatopsis nigrescens]
gi|522155496	73	26627	1	1	1	1	0.17	hypothetical protein [Amycolatopsis nigrescens]
gi|489190463	56	43857	1	1	1	1	0.10	hypothetical protein [Amycolatopsis vancoresmycina]
gi|517532060	68	15177	1	1	1	1	0.22	hypothetical protein [Anaeromusa acidaminophila]
gi|653149681	59	37048	6	6	1	1	0.09	hypothetical protein [Anaerovorax odorimutans]
gi|545383331	58	20592	1	1	1	1	0.16	hypothetical protein [Aneurinibacillus aneurinilyticus]
gi|510823315	52	19146	1	1	1	1	0.18	hypothetical protein [Arcticibacter svalbardensis]
gi|503114823	70	25553	1	1	1	1	0.18	hypothetical protein [Arthrobacter arilaitensis]
gi|517817720	40	90101	1	1	1	1	0.05	hypothetical protein [Azoarcus toluclasticus]
gi|655952285	109	51507	2	2	1	1	0.06	hypothetical protein [Azonexus hydrophilus]
gi|549783320	62	76961	1	1	1	1	0.04	hypothetical protein [Bacillus amyloliquefaciens]
gi|446882265	57	61005	1	1	1	1	0.07	hypothetical protein [Bacillus cereus]
gi|518212627	43	59604	1	1	1	1	0.06	hypothetical protein [Bacillus oceanisediminis]
gi|727659890	86	44195	4	4	1	1	0.10	hypothetical protein [Bacillus sp. KW-12]
gi|727659890	67	44195	2	2	1	1	0.10	hypothetical protein [Bacillus sp. KW-12]
gi|496038293	61	48397	2	2	1	1	0.09	hypothetical protein [Bacteroides sp. 1_1_14]
gi|488625612	43	111483	1	1	1	1	0.04	hypothetical protein [Bacteroides sp. HPS0048]
gi|492448985	55	44192	1	1	1	1	0.10	hypothetical protein [Bacteroides vulgatus]
gi|505283163	31	28769	1	1	1	1	0.16	hypothetical protein [Bdellovibrio exovorus]
gi|494075986	65	55098	4	4	1	1	0.06	hypothetical protein [Bermanella marisrubri]
gi|639061556	60	28489	1	1	1	1	0.12	hypothetical protein [Bifidobacterium subtile]
gi|498218435	63	168542	1	1	1	1	0.02	hypothetical protein [Brachybacterium squillarum]
gi|654899607	53	65682	1	1	1	1	0.07	hypothetical protein [Bradyrhizobium elkanii]
gi|639285477	43	64220	1	1	1	1	0.05	hypothetical protein [Bradyrhizobium sp. OHSU_III]
gi|494875803	46	59140	1	1	1	1	0.07	hypothetical protein [Bradyrhizobium sp. WSM1253]
gi|656049367	88	21526	8	8	1	1	0.16	hypothetical protein [Brevundimonas aveniformis]
gi|503106787	37	9261	1	1	1	1	0.56	hypothetical protein [Burkholderia sp. CCGE1003]
gi|551035716	73	28192	3	3	1	1	0.12	hypothetical protein [Butyrivibrio sp. AE3009]
gi|551035716	122	28192	6	6	1	1	0.12	hypothetical protein [Butyrivibrio sp. AE3009]
gi|551035716	66	28192	1	1	1	1	0.16	hypothetical protein [Butyrivibrio sp. AE3009]
gi|551035716	129	28192	6	6	1	1	0.16	hypothetical protein [Butyrivibrio sp. AE3009]
gi|551035716	108	28192	4	4	1	1	0.12	hypothetical protein [Butyrivibrio sp. AE3009]
gi|551035716	71	28192	1	1	1	1	0.16	hypothetical protein [Butyrivibrio sp. AE3009]
gi|551035716	72	28192	2	2	1	1	0.16	hypothetical protein [Butyrivibrio sp. AE3009]
gi|551035716	65	28192	3	3	1	1	0.16	hypothetical protein [Butyrivibrio sp. AE3009]
gi|640329082	66	25087	1	1	1	1	0.13	hypothetical protein [Butyrivibrio sp. FCS014]
gi|651394351	45	482796	1	1	1	1	0.01	hypothetical protein [Butyrivibrio sp. NC3005]
gi|651380946	50	20991	1	1	1	1	0.22	hypothetical protein [Butyrivibrio sp. XPD2002]
gi|518998154	64	18281	1	1	1	1	0.25	hypothetical protein [Caldibacillus debilis]
gi|493986770	60	24391	1	1	1	1	0.19	hypothetical protein [Caldithrix abyssi]
gi|557308536	121	20716	10	10	1	1	0.16	hypothetical protein [Campylobacter fetus]
gi|557308536	90	20716	6	6	1	1	0.22	hypothetical protein [Campylobacter fetus]
gi|557308536	66	20716	1	1	1	1	0.22	hypothetical protein [Campylobacter fetus]
gi|557308536	128	20716	8	8	1	1	0.22	hypothetical protein [Campylobacter fetus]
gi|557308536	71	20716	3	3	1	1	0.16	hypothetical protein [Campylobacter fetus]
gi|557308536	70	20716	3	3	1	1	0.22	hypothetical protein [Campylobacter fetus]
gi|557308536	147	20716	9	9	1	1	0.22	hypothetical protein [Campylobacter fetus]
gi|557308536	70	20716	1	1	1	1	0.22	hypothetical protein [Campylobacter fetus]
gi|563777130	59	21310	1	1	1	1	0.22	hypothetical protein [candidate division SR1 bacterium RAAC1_SR1_1]
gi|494805642	49	26472	1	1	1	1	0.17	hypothetical protein [Candidatus Aquiluna sp. IMCC13023]
gi|494805642	71	26472	1	1	1	1	0.17	hypothetical protein [Candidatus Aquiluna sp. IMCC13023]
gi|655034773	55	64161	1	1	1	1	0.07	hypothetical protein [Candidatus Omnitrophus fodinae]
gi|521049713	58	48359	1	1	1	1	0.09	hypothetical protein [Candidatus Poribacteria sp. WGA-4E]
gi|499487972	59	27534	1	1	1	1	0.12	hypothetical protein [Candidatus Protochlamydia amoebophila]
gi|506279674	56	77733	1	1	1	1	0.04	hypothetical protein [Candidatus Sulcia muelleri]
gi|506279674	57	77733	1	1	1	1	0.06	hypothetical protein [Candidatus Sulcia muelleri]
gi|488749882	97	33321	10	10	1	1	0.10	hypothetical protein [Capnocytophaga ochracea]
gi|512709207	88	165910	5	5	1	1	0.02	hypothetical protein [Capnocytophaga sp. oral taxon 336]
gi|512709207	65	165910	1	1	1	1	0.02	hypothetical protein [Capnocytophaga sp. oral taxon 336]
gi|512709207	65	165910	1	1	1	1	0.03	hypothetical protein [Capnocytophaga sp. oral taxon 336]
gi|493550719	60	51713	1	1	1	1	0.06	hypothetical protein [Catenibacterium mitsuokai]
gi|517966842	67	24316	1	1	1	1	0.14	hypothetical protein [Cellulomonas massiliensis]
gi|648234046	68	47334	2	2	1	1	0.07	hypothetical protein [Chelatococcus sp. GW1]
gi|648234046	59	47334	1	1	1	1	0.09	hypothetical protein [Chelatococcus sp. GW1]
gi|518233746	54	36263	1	1	1	1	0.12	hypothetical protein [Chelatococcus sp. GW1]
gi|655006959	65	87011	1	1	1	1	0.04	hypothetical protein [Chitinilyticum litopenaei]
gi|655006959	56	87011	1	1	1	1	0.04	hypothetical protein [Chitinilyticum litopenaei]
gi|655006959	60	87011	1	1	1	1	0.05	hypothetical protein [Chitinilyticum litopenaei]
gi|654996724	60	49487	1	1	1	1	0.07	hypothetical protein [Chitinimonas koreensis]
gi|517578408	58	51218	1	1	1	1	0.06	hypothetical protein [Chitiniphilus shinanonensis]
gi|670510633	29	10982	1	1	1	1	0.31	hypothetical protein [Chloroflexus sp. MS-G]
gi|499446454	33	40995	1	1	1	1	0.11	hypothetical protein [Chromobacterium violaceum]
gi|489066783	58	29736	1	1	1	1	0.11	hypothetical protein [Chryseobacterium gleum]
gi|494036354	67	15624	1	1	1	1	0.30	hypothetical protein [Chthoniobacter flavus]
gi|494036354	64	15624	1	1	1	1	0.30	hypothetical protein [Chthoniobacter flavus]
gi|494036354	68	15624	1	1	1	1	0.30	hypothetical protein [Chthoniobacter flavus]
gi|494036354	63	15624	1	1	1	1	0.30	hypothetical protein [Chthoniobacter flavus]
gi|658502766	54	49600	1	1	1	1	0.07	hypothetical protein [Clostridium sp. Ade.TY]
gi|495675248	58	42924	1	1	1	1	0.08	hypothetical protein [Clostridium sp. L2-50]
gi|517836689	60	15573	1	1	1	1	0.31	hypothetical protein [Cohnella laeviribosi]
gi|652776299	30	39375	1	1	1	1	0.08	hypothetical protein [Cohnella panacarvi]
gi|516647607	42	33092	1	1	1	1	0.14	hypothetical protein [Corynebacterium capitovis]
gi|493877065	42	39585	1	1	1	1	0.08	hypothetical protein [Corynebacterium casei]
gi|499324095	59	140325	1	1	1	1	0.02	hypothetical protein [Corynebacterium glutamicum]
gi|505017267	39	61403	1	1	1	1	0.07	hypothetical protein [Crinalium epipsammum]
gi|516497953	57	60668	1	1	1	1	0.07	hypothetical protein [Curtobacterium flaccumfaciens]
gi|501158316	55	74102	1	1	1	1	0.04	hypothetical protein [Delftia acidovorans]
gi|503569209	42	63397	1	1	1	1	0.05	hypothetical protein [Delftia sp. Cs1-4]
gi|521074038	73	59795	3	3	1	1	0.11	hypothetical protein [Demetria terragena]
gi|502776813	60	60831	1	1	1	1	0.05	hypothetical protein [Denitrovibrio acetiphilus]
gi|654867821	56	22730	1	1	1	1	0.15	hypothetical protein [Desulfatiglans anilini]
gi|654872834	64	246264	1	1	1	1	0.01	hypothetical protein [Desulfatirhabdium butyrativorans]
gi|655140313	38	45401	1	1	1	1	0.07	hypothetical protein [Desulfocurvus vexinensis]
gi|503952839	57	35991	1	1	1	1	0.12	hypothetical protein [Desulfosporosinus orientis]
gi|653115424	37	59589	1	1	1	1	0.07	hypothetical protein [Desulfotomaculum alcoholivorax]
gi|734872297	66	20163	1	1	1	1	0.23	hypothetical protein [Desulfotomaculum sp. BIC-A1/1_c7]
gi|734872297	65	20163	2	2	1	1	0.23	hypothetical protein [Desulfotomaculum sp. BIC-A1/1_c7]
gi|734872297	73	20163	3	3	1	1	0.23	hypothetical protein [Desulfotomaculum sp. BIC-A1/1_c7]
gi|502350885	68	4327	1	1	1	1	1.46	hypothetical protein [Dickeya zeae]
gi|518682176	58	7567	1	1	1	1	0.47	hypothetical protein [Dickeya zeae]
gi|493471768	55	10183	1	1	1	1	0.49	hypothetical protein [Dorea longicatena]
gi|651808653	58	20584	1	1	1	1	0.22	hypothetical protein [Dyella japonica]
gi|517843409	56	40311	1	1	1	1	0.08	hypothetical protein [Elioraea tepidiphila]
gi|695749002	37	30878	1	1	1	1	0.15	hypothetical protein [Enterobacter cloacae]
gi|510930259	85	58477	1	1	1	1	0.06	hypothetical protein [Enterococcus cecorum]
gi|510802654	33	166727	1	1	1	1	0.03	hypothetical protein [Enterococcus durans]
gi|488284969	60	12526	2	2	1	1	0.39	hypothetical protein [Enterococcus faecalis]
gi|488284969	108	12526	4	4	1	1	0.39	hypothetical protein [Enterococcus faecalis]
gi|488284969	59	12526	1	1	1	1	0.27	hypothetical protein [Enterococcus faecalis]
gi|488284969	71	12526	1	1	1	1	0.39	hypothetical protein [Enterococcus faecalis]
gi|488284969	71	12526	2	2	1	1	0.39	hypothetical protein [Enterococcus faecalis]
gi|498450534	204	15547	9	9	1	1	0.22	hypothetical protein [Enterococcus pallens]
gi|498450534	400	15547	36	36	1	1	0.22	hypothetical protein [Enterococcus pallens]
gi|498450534	173	15547	16	16	1	1	0.31	hypothetical protein [Enterococcus pallens]
gi|498450534	83	15547	2	2	1	1	0.31	hypothetical protein [Enterococcus pallens]
gi|498450534	136	15547	9	9	1	1	0.31	hypothetical protein [Enterococcus pallens]
gi|498450534	487	15547	40	40	1	1	0.22	hypothetical protein [Enterococcus pallens]
gi|498450534	61	15547	1	1	1	1	0.22	hypothetical protein [Enterococcus pallens]
gi|498450534	73	15547	1	1	1	1	0.31	hypothetical protein [Enterococcus pallens]
gi|498450534	179	15547	13	13	1	1	0.31	hypothetical protein [Enterococcus pallens]
gi|511067767	36	21243	1	1	1	1	0.16	hypothetical protein [Enterorhabdus caecimuris]
gi|494288746	66	20857	1	1	1	1	0.16	hypothetical protein [Erythrobacter sp. NAP1]
gi|485717869	52	95851	1	1	1	1	0.03	hypothetical protein [Escherichia coli]
gi|491505351	54	71496	1	1	1	1	0.05	hypothetical protein [Eubacterium ventriosum]
gi|501338593	77	39806	1	1	1	1	0.11	hypothetical protein [Exiguobacterium sibiricum]
gi|493848338	32	94336	1	1	1	1	0.05	hypothetical protein [Flavobacteria bacterium BBFL7]
gi|657689161	55	16382	1	1	1	1	0.21	hypothetical protein [Flavobacteriaceae bacterium HQM9]
gi|559219664	47	39785	1	1	1	1	0.08	hypothetical protein [Flavobacterium limnosediminis]
gi|559219664	54	39785	1	1	1	1	0.11	hypothetical protein [Flavobacterium limnosediminis]
gi|492747787	39	13478	1	1	1	1	0.25	hypothetical protein [Fusobacterium varium]
gi|492747787	60	13478	1	1	1	1	0.25	hypothetical protein [Fusobacterium varium]
gi|492747787	65	13478	1	1	1	1	0.36	hypothetical protein [Fusobacterium varium]
gi|495757812	59	16884	2	2	2	2	0.44	hypothetical protein [Gallaecimonas xiamenensis]
gi|503027642	61	10273	1	1	1	1	0.34	hypothetical protein [gamma proteobacterium HdN1]
gi|518868007	38	15070	1	1	1	1	0.23	hypothetical protein [gamma proteobacterium SCGC AAA076-D02]
gi|516256556	38	26465	1	1	1	1	0.13	hypothetical protein [Geitlerinema sp. PCC 7105]
gi|516256556	55	26465	1	1	1	1	0.17	hypothetical protein [Geitlerinema sp. PCC 7105]
gi|658636487	54	63256	2	2	1	1	0.07	hypothetical protein [Gemmatimonadetes bacterium JGI 0000112-M07]
gi|500473160	68	33344	1	1	1	1	0.13	hypothetical protein [Geobacter uraniireducens]
gi|500473160	79	33344	1	1	1	1	0.13	hypothetical protein [Geobacter uraniireducens]
gi|500473160	103	33344	2	2	1	1	0.13	hypothetical protein [Geobacter uraniireducens]
gi|522166093	54	93409	1	1	1	1	0.04	hypothetical protein [Geopsychrobacter electrodiphilus]
gi|652459094	43	35219	2	2	1	1	0.09	hypothetical protein [Geothrix fermentans]
gi|554672664	62	7929	1	1	1	1	0.67	hypothetical protein [Gloeobacter kilaueensis]
gi|499455834	62	58485	1	1	1	1	0.07	hypothetical protein [Gloeobacter violaceus]
gi|516950382	62	56303	1	1	1	1	0.06	hypothetical protein [Gordonia kroppenstedtii]
gi|521070150	80	28951	1	1	1	1	0.16	hypothetical protein [Gracilimonas tropica]
gi|551262006	288	16294	52	52	1	1	0.29	hypothetical protein [Gryllotalpicola ginsengisoli]
gi|551262006	231	16294	42	42	1	1	0.29	hypothetical protein [Gryllotalpicola ginsengisoli]
gi|521074579	53	79215	1	1	1	1	0.04	hypothetical protein [Hahella ganghwensis]
gi|515331329	52	41402	1	1	1	1	0.11	hypothetical protein [Halomonas smyrnensis]
gi|515480551	56	42357	1	1	1	1	0.08	hypothetical protein [Halomonas stevensii]
gi|543937574	52	35465	1	1	1	1	0.13	hypothetical protein [Haloplasma contractile]
gi|489046703	51	26848	1	1	1	1	0.12	hypothetical protein [Helicobacter cinaedi]
gi|515280048	60	12860	1	1	1	1	0.38	hypothetical protein [Herbaspirillum lusitanum]
gi|516023977	79	42222	1	1	1	1	0.10	hypothetical protein [Herbaspirillum rubrisubalbicans]
gi|516023977	79	42222	1	1	1	1	0.10	hypothetical protein [Herbaspirillum rubrisubalbicans]
gi|516023977	718	42222	21	21	9	9	1.47	hypothetical protein [Herbaspirillum seropedicae]
gi|516023977	243	42222	7	7	5	5	0.82	hypothetical protein [Herbaspirillum seropedicae]
gi|499928742	61	7355	1	1	1	1	0.48	hypothetical protein [Histophilus somni]
gi|563757362	51	77072	1	1	1	1	0.06	hypothetical protein [Hyphomicrobium nitrativorans]
gi|497462794	50	25325	1	1	1	1	0.18	hypothetical protein [Janibacter sp. HTCC2649]
gi|652464009	62	35369	1	1	1	1	0.09	hypothetical protein [Jeotgalicoccus psychrophilus]
gi|491683359	179	55792	8	8	1	1	0.06	hypothetical protein [Johnsonella ignava]
gi|556476266	44	26191	1	1	1	1	0.17	hypothetical protein [Klebsiella pneumoniae]
gi|494156639	46	96189	1	1	1	1	0.04	hypothetical protein [Kordia algicida]
gi|495470955	44	42622	1	1	1	1	0.08	hypothetical protein [Labrenzia alexandrii]
gi|656027156	65	72425	1	1	1	1	0.06	hypothetical protein [Labrenzia sp. DG1229]
gi|496566948	164	29241	10	10	1	1	0.11	hypothetical protein [Lachnospiraceae bacterium 1_4_56FAA]
gi|496566704	64	22886	5	5	1	1	0.31	hypothetical protein [Lachnospiraceae bacterium 1_4_56FAA]
gi|496566948	51	29241	1	1	1	1	0.11	hypothetical protein [Lachnospiraceae bacterium 1_4_56FAA]
gi|496566704	80	22886	4	4	1	1	0.20	hypothetical protein [Lachnospiraceae bacterium 1_4_56FAA]
gi|496566704	57	22886	1	1	1	1	0.15	hypothetical protein [Lachnospiraceae bacterium 1_4_56FAA]
gi|496566704	67	22886	2	2	1	1	0.44	hypothetical protein [Lachnospiraceae bacterium 1_4_56FAA]
gi|496566704	62	22886	2	2	1	1	0.44	hypothetical protein [Lachnospiraceae bacterium 1_4_56FAA]
gi|653216357	63	37913	1	1	1	1	0.12	hypothetical protein [Lachnospiraceae bacterium AD3010]
gi|511040498	51	44060	1	1	1	1	0.10	hypothetical protein [Lachnospiraceae bacterium M18-1]
gi|504378896	64	81206	1	1	1	1	0.05	hypothetical protein [Lactobacillus amylovorus]
gi|504378896	82	81206	1	1	1	1	0.05	hypothetical protein [Lactobacillus amylovorus]
gi|504378896	76	81206	1	1	1	1	0.05	hypothetical protein [Lactobacillus amylovorus]
gi|489679211	57	48942	1	1	1	1	0.07	hypothetical protein [Lactobacillus casei]
gi|639447683	57	30569	1	1	1	1	0.15	hypothetical protein [Lactobacillus fabifermentans]
gi|490151401	47	10187	1	1	1	1	0.34	hypothetical protein [Lactobacillus murinus]
gi|491919210	97	55351	4	4	1	1	0.06	hypothetical protein [Lautropia mirabilis]
gi|491919210	96	55351	6	6	1	1	0.06	hypothetical protein [Lautropia mirabilis]
gi|491919210	115	55351	8	8	1	1	0.08	hypothetical protein [Lautropia mirabilis]
gi|491919210	67	55351	1	1	1	1	0.08	hypothetical protein [Lautropia mirabilis]
gi|491919210	90	55351	5	5	1	1	0.08	hypothetical protein [Lautropia mirabilis]
gi|491919210	78	55351	2	2	1	1	0.06	hypothetical protein [Lautropia mirabilis]
gi|491919210	68	55351	1	1	1	1	0.08	hypothetical protein [Lautropia mirabilis]
gi|491919210	87	55351	4	4	1	1	0.08	hypothetical protein [Lautropia mirabilis]
gi|670480711	52	22773	1	1	1	1	0.20	hypothetical protein [Leeuwenhoekiella sp. MAR_2009_132]
gi|738910413	71	22330	3	3	1	1	0.21	hypothetical protein [Leisingera caerulea]
gi|515856382	62	63809	1	1	1	1	0.05	hypothetical protein [Leptolyngbya boryana]
gi|515856382	56	63809	1	1	1	1	0.07	hypothetical protein [Leptolyngbya boryana]
gi|488844256	53	15517	1	1	1	1	0.22	hypothetical protein [Leptospira borgpetersenii]
gi|496226193	64	32058	3	3	1	1	0.10	hypothetical protein [Marinobacter santoriniensis]
gi|496226193	59	32058	2	2	1	1	0.10	hypothetical protein [Marinobacter santoriniensis]
gi|496226193	60	32058	3	3	1	1	0.14	hypothetical protein [Marinobacter santoriniensis]
gi|496226193	61	32058	1	1	1	1	0.14	hypothetical protein [Marinobacter santoriniensis]
gi|654350817	52	24215	2	2	1	1	0.30	hypothetical protein [Mastigocoleus testarum]
gi|654347566	71	51035	1	1	1	1	0.09	hypothetical protein [Mastigocoleus testarum]
gi|738309088	57	29328	2	2	1	1	0.15	hypothetical protein [Mastigocoleus testarum]
gi|20803970	54	59225	1	1	1	1	0.06	HYPOTHETICAL PROTEIN [Mesorhizobium loti R7A]
gi|551327936	58	28991	1	1	1	1	0.16	hypothetical protein [Methylohalobius crimeensis]
gi|521974301	41	42871	1	1	1	1	0.10	hypothetical protein [Methylomonas sp. MK1]
gi|565873269	67	43256	1	1	1	1	0.10	hypothetical protein [Microbacterium sp. TS-1]
gi|565873269	65	43256	1	1	1	1	0.08	hypothetical protein [Microbacterium sp. TS-1]
gi|488878730	105	16235	2	2	1	1	0.21	hypothetical protein [Microcystis aeruginosa]
gi|488878730	115	16235	1	1	1	1	0.29	hypothetical protein [Microcystis aeruginosa]
gi|653065710	34	33897	1	1	1	1	0.10	hypothetical protein [Microvirga flocculans]
gi|571173139	56	6646	1	1	1	1	0.83	hypothetical protein [Morganella morganii IS15]
gi|504396559	114	23227	30	30	1	1	0.31	hypothetical protein [Mycoplasma haemofelis]
gi|504396559	76	23227	6	6	1	1	0.14	hypothetical protein [Mycoplasma haemofelis]
gi|490124986	60	35067	2	2	1	1	0.09	hypothetical protein [Mycoplasma iowae]
gi|488713917	52	48562	1	1	1	1	0.07	hypothetical protein [Myxococcus sp. (contaminant ex DSM 436)]
gi|489804385	54	19176	1	1	1	1	0.24	hypothetical protein [Neisseria lactamica]
gi|655020570	71	39220	4	4	1	1	0.08	hypothetical protein [Neptunomonas japonica]
gi|501031121	52	34742	1	1	1	1	0.13	hypothetical protein [Nitratiruptor sp. SB155-2]
gi|516111465	42	30620	1	1	1	1	0.11	hypothetical protein [Nocardiopsis halophila]
gi|516211687	63	24835	1	1	1	1	0.13	hypothetical protein [Nocardiopsis salina]
gi|738603720	58	24895	1	1	1	1	0.18	hypothetical protein [Oceanicaulis sp. HL-87]
gi|494603351	63	28129	1	1	1	1	0.16	hypothetical protein [Opitutaceae bacterium TAV1]
gi|494603351	67	28129	1	1	1	1	0.16	hypothetical protein [Opitutaceae bacterium TAV1]
gi|517060997	66	6881	1	1	1	1	0.52	hypothetical protein [Orenia marismortui]
gi|516328559	48	40051	1	1	1	1	0.11	hypothetical protein [Oscillatoria sp. PCC 10802]
gi|518467805	65	48549	1	1	1	1	0.07	hypothetical protein [Paenibacillus fonticola]
gi|388541249	64	41532	2	2	1	1	0.08	hypothetical protein [Paenibacillus mucilaginosus K02]
gi|388541249	80	41532	6	6	1	1	0.08	hypothetical protein [Paenibacillus mucilaginosus K02]
gi|388541249	57	41532	1	1	1	1	0.08	hypothetical protein [Paenibacillus mucilaginosus K02]
gi|648240153	57	35026	1	1	1	1	0.13	hypothetical protein [Paenibacillus senegalensis]
gi|516286038	61	37301	2	2	1	1	0.09	hypothetical protein [Paenibacillus sp. PAMC 26794]
gi|518244132	74	112244	1	1	1	1	0.03	hypothetical protein [Paenisporosarcina sp. TG20]
gi|518245508	62	13981	1	1	1	1	0.24	hypothetical protein [Paenisporosarcina sp. TG20]
gi|499676709	73	43163	1	1	1	1	0.10	hypothetical protein [Pelodictyon luteolum]
gi|499676709	75	43163	1	1	1	1	0.10	hypothetical protein [Pelodictyon luteolum]
gi|490960490	54	115797	1	1	1	1	0.04	hypothetical protein [Peptoniphilus indolicus]
gi|517937182	58	46282	1	1	1	1	0.07	hypothetical protein [Peptoniphilus senegalensis]
gi|496997459	60	60639	1	1	1	1	0.05	hypothetical protein [Peptoniphilus sp. oral taxon 375]
gi|496997459	60	60639	1	1	1	1	0.07	hypothetical protein [Peptoniphilus sp. oral taxon 375]
gi|488813955	62	48515	3	3	1	1	0.07	hypothetical protein [Phaeospirillum molischianum]
gi|488813955	62	48515	2	2	1	1	0.07	hypothetical protein [Phaeospirillum molischianum]
gi|488722642	60	117076	1	1	1	1	0.04	hypothetical protein [Planctomyces maris]
gi|669786244	58	101799	1	1	1	1	0.03	hypothetical protein [Polaromonas naphthalenivorans CJ2]
gi|491611414	51	121995	1	1	1	1	0.04	hypothetical protein [Porphyromonas catoniae]
gi|517794586	65	17113	1	1	1	1	0.27	hypothetical protein [Porphyromonas gulae]
gi|490479122	70	125434	5	5	1	1	0.03	hypothetical protein [Prevotella buccalis]
gi|490479122	55	125434	1	1	1	1	0.03	hypothetical protein [Prevotella buccalis]
gi|490479122	58	125434	1	1	1	1	0.03	hypothetical protein [Prevotella buccalis]
gi|490479122	59	125434	2	2	1	1	0.03	hypothetical protein [Prevotella buccalis]
gi|490513994	52	18685	1	1	1	1	0.18	hypothetical protein [Prevotella oulorum]
gi|490513994	52	18685	2	2	1	1	0.25	hypothetical protein [Prevotella oulorum]
gi|490513994	55	18685	1	1	1	1	0.25	hypothetical protein [Prevotella oulorum]
gi|500189538	63	12891	1	1	1	1	0.38	hypothetical protein [Prochlorococcus marinus]
gi|500144558	34	8452	1	1	1	1	0.62	hypothetical protein [Prochlorococcus marinus]
gi|739115213	44	36361	1	1	1	1	0.12	hypothetical protein [Prolixibacter bellariivorans]
gi|488474629	62	57756	1	1	1	1	0.08	hypothetical protein [Propionibacterium acnes]
gi|655449432	86	23454	2	2	2	2	0.31	hypothetical protein [Proteobacteria bacterium JGI 0000113-E04]
gi|655449430	49	20581	1	1	1	1	0.16	hypothetical protein [Proteobacteria bacterium JGI 0000113-E04]
gi|655446402	49	24237	1	1	1	1	0.14	hypothetical protein [Proteobacteria bacterium JGI 0000113-E04]
gi|655447870	56	15412	1	1	1	1	0.31	hypothetical protein [Proteobacteria bacterium JGI 0000113-E04]
gi|491045848	65	16803	1	1	1	1	0.20	hypothetical protein [Providencia rettgeri]
gi|518329147	93	27218	2	2	1	1	0.12	hypothetical protein [Pseudanabaena sp. PCC 6802]
gi|518329147	84	27218	1	1	1	1	0.17	hypothetical protein [Pseudanabaena sp. PCC 6802]
gi|518329147	75	27218	1	1	1	1	0.17	hypothetical protein [Pseudanabaena sp. PCC 6802]
gi|654788498	58	49504	1	1	1	1	0.09	hypothetical protein [Pseudobutyrivibrio ruminis]
gi|516518751	96	28488	3	3	1	1	0.16	hypothetical protein [Pseudomonas fuscovaginae]
gi|516518751	70	28488	1	1	1	1	0.12	hypothetical protein [Pseudomonas fuscovaginae]
gi|516518751	77	28488	1	1	1	1	0.16	hypothetical protein [Pseudomonas fuscovaginae]
gi|516518751	69	28488	1	1	1	1	0.16	hypothetical protein [Pseudomonas fuscovaginae]
gi|489345105	78	23875	1	1	1	1	0.19	hypothetical protein [Pseudomonas putida]
gi|655205975	61	51917	1	1	1	1	0.08	hypothetical protein [Pseudomonas resinovorans]
gi|495844900	195	24436	9	9	1	1	0.14	hypothetical protein [Pseudomonas sp. Chol1]
gi|498495361	58	24554	1	1	1	1	0.19	hypothetical protein [Pseudomonas sp. HPB0071]
gi|516280839	56	21808	1	1	1	1	0.21	hypothetical protein [Pseudomonas syringae]
gi|521258007	315	53880	11	11	1	1	0.06	hypothetical protein [Psychrobacter sp. G]
gi|521258007	170	53880	5	5	1	1	0.06	hypothetical protein [Psychrobacter sp. G]
gi|521258007	227	53880	7	7	1	1	0.08	hypothetical protein [Psychrobacter sp. G]
gi|521258007	82	53880	1	1	1	1	0.08	hypothetical protein [Psychrobacter sp. G]
gi|521258007	82	53880	1	1	1	1	0.06	hypothetical protein [Psychrobacter sp. G]
gi|521258007	75	53880	1	1	1	1	0.08	hypothetical protein [Psychrobacter sp. G]
gi|521258007	124	53880	3	3	1	1	0.08	hypothetical protein [Psychrobacter sp. G]
gi|521258007	179	53880	5	5	1	1	0.08	hypothetical protein [Psychrobacter sp. G]
gi|518445745	79	83732	1	1	1	1	0.04	hypothetical protein [Psychromonas ossibalaenae]
gi|544767997	64	24250	2	2	1	1	0.19	hypothetical protein [Ralstonia sp. AU12-08]
gi|544767997	84	24250	5	5	1	1	0.19	hypothetical protein [Ralstonia sp. AU12-08]
gi|497248105	44	9233	1	1	1	1	0.56	hypothetical protein [Rhodobacter sp. AKP1]
gi|694040442	55	24526	1	1	1	1	0.19	hypothetical protein [Rhodococcus fascians]
gi|518493599	57	27674	1	1	1	1	0.12	hypothetical protein [Rhodococcus sp. 29MFTsu3.1]
gi|518493599	65	27674	1	1	1	1	0.16	hypothetical protein [Rhodococcus sp. 29MFTsu3.1]
gi|518493599	82	27674	2	2	1	1	0.16	hypothetical protein [Rhodococcus sp. 29MFTsu3.1]
gi|495660504	42	116980	1	1	1	1	0.04	hypothetical protein [Rhodovulum sp. PH10]
gi|491058855	52	49339	1	1	1	1	0.07	hypothetical protein [Riemerella anatipestifer]
gi|739431709	63	24802	1	1	1	1	0.18	hypothetical protein [Rikenella microfusus]
gi|740872573	74	116288	1	1	1	1	0.04	hypothetical protein [Rikenellaceae bacterium M3]
gi|504934861	77	6707	2	2	1	1	0.54	hypothetical protein [Rivularia sp. PCC 7116]
gi|504934861	60	6707	1	1	1	1	0.83	hypothetical protein [Rivularia sp. PCC 7116]
gi|494063112	61	43617	1	1	1	1	0.10	hypothetical protein [Roseomonas cervicalis]
gi|494060503	53	18087	1	1	1	1	0.26	hypothetical protein [Roseomonas cervicalis]
gi|494063112	56	43617	1	1	1	1	0.08	hypothetical protein [Roseomonas cervicalis]
gi|497543730	76	35570	1	1	1	1	0.09	hypothetical protein [Rubrivivax benzoatilyticus]
gi|496447690	41	27750	1	1	1	1	0.16	hypothetical protein [Saccharomonospora marina]
gi|497997259	33	22940	1	1	1	1	0.20	hypothetical protein [Saccharopolyspora spinosa]
gi|517634089	63	190736	1	1	1	1	0.02	hypothetical protein [Salinispora arenicola]
gi|648631247	52	21714	1	1	1	1	0.15	hypothetical protein [Salinispora pacifica]
gi|518884693	57	122728	1	1	1	1	0.03	hypothetical protein [Salipiger mucosus]
gi|518887406	59	62631	1	1	1	1	0.07	hypothetical protein [Salipiger mucosus]
gi|517444987	43	90608	1	1	1	1	0.04	hypothetical protein [Segetibacter koreensis]
gi|517443449	31	88918	1	1	1	1	0.04	hypothetical protein [Segetibacter koreensis]
gi|496716028	64	64775	1	1	1	1	0.05	hypothetical protein [Selenomonas artemidis]
gi|492996208	64	16454	1	1	1	1	0.29	hypothetical protein [Shewanella baltica]
gi|647614705	52	55083	1	1	1	1	0.06	hypothetical protein [Shewanella haliotis]
gi|505061328	38	17871	1	1	1	1	0.26	hypothetical protein [Singulisphaera acidiphila]
gi|504577922	45	8061	2	2	1	1	0.65	hypothetical protein [Sinorhizobium fredii]
gi|504577922	38	8061	1	1	1	1	0.65	hypothetical protein [Sinorhizobium fredii]
gi|522089181	65	27998	1	1	1	1	0.12	hypothetical protein [Spirosoma panaciterrae]
gi|518717172	76	17833	1	1	1	1	0.19	hypothetical protein [Sporichthya polymorpha]
gi|655912193	63	31157	2	2	1	1	0.14	hypothetical protein [Sporocytophaga myxococcoides]
gi|655912193	66	31157	3	3	1	1	0.14	hypothetical protein [Sporocytophaga myxococcoides]
gi|655912193	66	31157	1	1	1	1	0.11	hypothetical protein [Sporocytophaga myxococcoides]
gi|655912193	58	31157	1	1	1	1	0.14	hypothetical protein [Sporocytophaga myxococcoides]
gi|655912193	69	31157	2	2	1	1	0.14	hypothetical protein [Sporocytophaga myxococcoides]
gi|505007868	42	87502	1	1	1	1	0.04	hypothetical protein [Stanieria cyanosphaera]
gi|657924256	59	15763	1	1	1	1	0.30	hypothetical protein [Staphylococcus aureus]
gi|446728818	73	51303	1	1	1	1	0.09	hypothetical protein [Streptococcus oralis]
gi|671498626	44	60535	1	1	1	1	0.05	hypothetical protein [Streptomyces bicolor]
gi|671498626	41	60535	1	1	1	1	0.07	hypothetical protein [Streptomyces bicolor]
gi|491085267	37	44639	1	1	1	1	0.10	hypothetical protein [Streptomyces mobaraensis]
gi|663396015	57	16761	1	1	1	1	0.20	hypothetical protein [Streptomyces purpeofuscus]
gi|663396015	83	16761	5	5	1	1	0.28	hypothetical protein [Streptomyces purpeofuscus]
gi|663396015	88	16761	1	1	1	1	0.28	hypothetical protein [Streptomyces purpeofuscus]
gi|663396015	201	16761	5	5	1	1	0.28	hypothetical protein [Streptomyces purpeofuscus]
gi|663396015	84	16761	1	1	1	1	0.20	hypothetical protein [Streptomyces purpeofuscus]
gi|663396015	94	16761	2	2	1	1	0.28	hypothetical protein [Streptomyces purpeofuscus]
gi|663396015	90	16761	2	2	1	1	0.28	hypothetical protein [Streptomyces purpeofuscus]
gi|664063214	295	6988	17	17	1	1	0.51	hypothetical protein [Streptomyces rimosus]
gi|664063214	291	6988	17	17	1	1	0.51	hypothetical protein [Streptomyces rimosus]
gi|664063214	257	6988	16	16	1	1	0.78	hypothetical protein [Streptomyces rimosus]
gi|664063214	75	6988	3	3	1	1	0.78	hypothetical protein [Streptomyces rimosus]
gi|664063214	319	6988	23	23	1	1	0.78	hypothetical protein [Streptomyces rimosus]
gi|664063214	125	6988	8	8	1	1	0.51	hypothetical protein [Streptomyces rimosus]
gi|664063214	56	6988	2	2	1	1	0.51	hypothetical protein [Streptomyces rimosus]
gi|664063214	66	6988	3	3	1	1	0.78	hypothetical protein [Streptomyces rimosus]
gi|664063214	72	6988	2	2	1	1	0.78	hypothetical protein [Streptomyces rimosus]
gi|664063214	240	6988	15	15	1	1	0.78	hypothetical protein [Streptomyces rimosus]
gi|522192408	59	115451	1	1	1	1	0.03	hypothetical protein [Streptomyces sp. AA0539]
gi|517389535	45	33543	2	2	1	1	0.13	hypothetical protein [Streptomyces sp. BoleA5]
gi|517389535	56	33543	2	2	1	1	0.10	hypothetical protein [Streptomyces sp. BoleA5]
gi|517389535	54	33543	1	1	1	1	0.13	hypothetical protein [Streptomyces sp. BoleA5]
gi|571045265	61	72280	1	1	1	1	0.06	Hypothetical protein [Streptomyces sp. FR1]
gi|664525976	44	32822	2	2	1	1	0.14	hypothetical protein [Streptomyces sp. NRRL F-5650]
gi|664483337	45	101407	1	1	1	1	0.04	hypothetical protein [Streptomyces sp. NRRL F-5727]
gi|740052941	47	16433	1	1	1	1	0.29	hypothetical protein [Streptomyces sp. NRRL S-350]
gi|490093109	67	48425	1	1	1	1	0.09	hypothetical protein [Streptomyces viridochromogenes]
gi|502659342	68	42171	3	3	1	1	0.10	hypothetical protein [Streptosporangium roseum]
gi|640628128	41	10695	1	1	1	1	0.32	hypothetical protein [Sulfitobacter sp. NB-77]
gi|504111373	39	22144	1	1	1	1	0.15	hypothetical protein [Sulfobacillus acidophilus]
gi|655513959	66	58347	2	2	1	1	0.07	hypothetical protein [Syntrophorhabdus aromaticivorans]
gi|504599502	49	61935	1	1	1	1	0.05	hypothetical protein [Terriglobus roseus]
gi|655388890	64	11608	1	1	1	1	0.30	hypothetical protein [Thalassobaculum salexigens]
gi|517044875	48	44533	1	1	1	1	0.07	hypothetical protein [Thioalkalivibrio thiocyanodenitrificans]
gi|640286973	57	26720	1	1	1	1	0.12	hypothetical protein [Thiomicrospira kuenenii]
gi|655041295	1278	32255	24	24	1	1	0.22	hypothetical protein [Thiothrix lacustris]
gi|655039139	54	7483	1	1	1	1	0.48	hypothetical protein [Thiothrix lacustris]
gi|655039765	113	64972	1	1	1	1	0.05	hypothetical protein [Thiothrix lacustris]
gi|655040870	79	73029	1	1	1	1	0.04	hypothetical protein [Thiothrix lacustris]
gi|488797598	111	14914	4	4	2	2	0.51	hypothetical protein [Thiothrix nivea]
gi|297183253	52	30703	1	1	1	1	0.11	hypothetical protein [uncultured Spirochaetales bacterium HF0500_06B09]
gi|491529113	61	32578	1	1	1	1	0.10	hypothetical protein [Veillonella dispar]
gi|515168087	72	28012	1	1	1	1	0.16	hypothetical protein [Vibrio cyclitrophicus]
gi|515168087	67	28012	1	1	1	1	0.12	hypothetical protein [Vibrio cyclitrophicus]
gi|515168087	74	28012	1	1	1	1	0.16	hypothetical protein [Vibrio cyclitrophicus]
gi|490533446	52	11007	3	3	1	1	0.31	hypothetical protein [Vibrio nigripulchritudo]
gi|515593828	67	77279	2	2	1	1	0.06	hypothetical protein [Vibrio rumoiensis]
gi|498026748	57	22457	3	3	1	1	0.20	hypothetical protein [Xanthomonas sacchari]
gi|501260413	61	32639	1	1	1	1	0.14	hypothetical protein [Yersinia pseudotuberculosis]
gi|557311568	52	112896	1	1	1	1	0.03	hypothetical protein [Youngiibacter fragilis]
gi|502838987	68	68048	1	1	1	1	0.05	hypothetical protein [Zunongwangia profunda]
gi|518383892	42	33006	2	2	1	1	0.14	hypothetical protein [Zymophilus raffinosivorans]
gi|518383892	49	33006	1	1	1	1	0.14	hypothetical protein [Zymophilus raffinosivorans]
gi|518383892	40	33006	1	1	1	1	0.14	hypothetical protein [Zymophilus raffinosivorans]
gi|406943179	146	56214	5	5	2	2	0.12	hypothetical protein ACD_44C00197G0003 [uncultured bacterium]
gi|406943179	61	56214	1	1	1	1	0.08	hypothetical protein ACD_44C00197G0003 [uncultured bacterium]
gi|406930088	62	42750	1	1	1	1	0.08	hypothetical protein ACD_50C00064G0003 [uncultured bacterium]
gi|406891889	99	27508	1	1	1	1	0.12	hypothetical protein ACD_75C01146G0002 [uncultured bacterium]
gi|406883133	81	37588	1	1	1	1	0.12	hypothetical protein ACD_77C00477G0049 [uncultured bacterium]
gi|407001511	86	17387	6	6	1	1	0.19	hypothetical protein ACD_9C00319G0002 [uncultured bacterium]
gi|407001511	58	17387	3	3	1	1	0.19	hypothetical protein ACD_9C00319G0002 [uncultured bacterium]
gi|407001511	83	17387	8	8	1	1	0.27	hypothetical protein ACD_9C00319G0002 [uncultured bacterium]
gi|407001511	70	17387	3	3	1	1	0.27	hypothetical protein ACD_9C00319G0002 [uncultured bacterium]
gi|407001511	59	17387	1	1	1	1	0.19	hypothetical protein ACD_9C00319G0002 [uncultured bacterium]
gi|407001511	62	17387	1	1	1	1	0.27	hypothetical protein ACD_9C00319G0002 [uncultured bacterium]
gi|610708393	96	13298	1	1	1	1	0.36	hypothetical protein AT59_23185 [Aeromonas hydrophila AD9]
gi|325520150	57	33193	1	1	1	1	0.10	hypothetical protein B1M_37091 [Burkholderia sp. TJI49]
gi|404266655	62	86552	1	1	1	1	0.04	hypothetical protein BCCGELA001_24564 [Bradyrhizobium sp. CCGE-LA001]
gi|404264225	61	8691	1	1	1	1	0.60	hypothetical protein BCCGELA001_34573 [Bradyrhizobium sp. CCGE-LA001]
gi|228585463	50	33771	1	1	1	1	0.13	hypothetical protein bcere0001_35190 [Bacillus cereus m1293]
gi|152073316	15	5313	1	1	1	1	1.10	hypothetical protein BGP_5819 [Beggiatoa sp. PS]
gi|670619685	69	50826	3	3	1	1	0.06	hypothetical protein DB31_1281 [Hyalangium minutum]
gi|670619685	74	50826	2	2	1	1	0.06	hypothetical protein DB31_1281 [Hyalangium minutum]
gi|670619685	65	50826	1	1	1	1	0.09	hypothetical protein DB31_1281 [Hyalangium minutum]
gi|670614042	131	52060	14	14	1	1	0.06	hypothetical protein DB31_4834 [Hyalangium minutum]
gi|685690430	55	15832	1	1	1	1	0.21	hypothetical protein DM80_3070 [Burkholderia multivorans]
gi|660523955	65	28723	1	1	1	1	0.12	hypothetical protein DT23_06565 [Thioclava sp. DT23-4]
gi|377963092	51	5850	1	1	1	1	0.61	hypothetical protein ECDEC5A_1680 [Escherichia coli DEC5A]
gi|660640708	44	18068	1	1	1	1	0.19	hypothetical protein EL26_21560 [Tumebacillus flagellatus]
gi|668946128	64	52510	1	1	1	1	0.06	hypothetical protein FG93_04972 [Bosea sp. LC85]
gi|692536314	65	7151	1	1	1	1	0.50	hypothetical protein GS19_09175, partial [Acinetobacter sp. MII]
gi|692534111	123	11905	3	3	3	3	1.14	hypothetical protein GS19_17265, partial [Acinetobacter sp. MII]
gi|692534111	69	11905	1	1	1	1	0.41	hypothetical protein GS19_17265, partial [Acinetobacter sp. MII]
gi|692534111	57	11905	1	1	1	1	0.41	hypothetical protein GS19_17265, partial [Acinetobacter sp. MII]
gi|692533594	49	11392	1	1	1	1	0.43	hypothetical protein GS19_17550, partial [Acinetobacter sp. MII]
gi|692533594	103	11392	2	2	2	2	1.05	hypothetical protein GS19_17550, partial [Acinetobacter sp. MII]
gi|692533594	113	11392	2	2	2	2	1.05	hypothetical protein GS19_17550, partial [Acinetobacter sp. MII]
gi|317403225	62	23863	1	1	1	1	0.19	hypothetical protein HMPREF0005_02120 [Achromobacter xylosoxidans C54]
gi|387776624	59	23881	1	1	1	1	0.14	hypothetical protein HMPREF1055_02244 [Bacteroides fragilis CL07T00C01]
gi|512177505	90	165910	4	4	1	1	0.03	hypothetical protein HMPREF1528_02167 [Capnocytophaga sp. oral taxon 336 str. F0502]
gi|512177505	83	165910	4	4	1	1	0.03	hypothetical protein HMPREF1528_02167 [Capnocytophaga sp. oral taxon 336 str. F0502]
gi|356697764	56	40008	1	1	1	1	0.11	hypothetical protein HMPREF9473_02636 [ [[Clostridium] hathewayi WAL-18680]
gi|687959638	219	26738	7	7	2	2	0.42	hypothetical protein HRUBRA_00765 [Haliea rubra DSM 19751]
gi|671226974	55	61487	3	3	1	1	0.05	hypothetical protein IW15_10675 [Chryseobacterium soli]
gi|690714224	62	52512	1	1	1	1	0.08	hypothetical protein IX84_23695 [Saprospiraceae bacterium KD52]
gi|588484802	57	25806	1	1	1	1	0.13	hypothetical protein JCM14108_3089 [Lactobacillus farraginis JCM 14108]
gi|533211633	58	83635	4	4	1	1	0.05	hypothetical protein L682_10935 [Pseudomonas alcaligenes OT 69]
gi|410000959	63	6215	1	1	1	1	0.90	hypothetical protein LEP1GSC131_0276 [Leptospira kirschneri str. 200802841]
gi|410000959	59	6215	1	1	1	1	0.90	hypothetical protein LEP1GSC131_0276 [Leptospira kirschneri str. 200802841]
gi|410000959	65	6215	1	1	1	1	0.90	hypothetical protein LEP1GSC131_0276 [Leptospira kirschneri str. 200802841]
gi|410000959	61	6215	1	1	1	1	0.90	hypothetical protein LEP1GSC131_0276 [Leptospira kirschneri str. 200802841]
gi|632871004	52	44016	1	1	1	1	0.07	hypothetical protein LIG30_2351 [Burkholderia sp. lig30]
gi|530439111	76	90127	1	1	1	1	0.05	hypothetical protein M529_23080 [Sphingobium ummariense RL-3]
gi|530439111	79	90127	3	3	1	1	0.05	hypothetical protein M529_23080 [Sphingobium ummariense RL-3]
gi|530439111	92	90127	2	2	1	1	0.05	hypothetical protein M529_23080 [Sphingobium ummariense RL-3]
gi|530451821	62	15603	1	1	1	1	0.22	hypothetical protein M947_03225 [Sulfurimonas sp. AST-10]
gi|392716897	65	60769	1	1	1	1	0.07	hypothetical protein MW7_0921 [Ralstonia sp. PBA]
gi|353193986	50	43071	1	1	1	1	0.10	hypothetical protein MycrhDRAFT_1926 [Mycobacterium rhodesiae JS60]
gi|554970342	30	58711	1	1	1	1	0.07	hypothetical protein N510_00399 [Firmicutes bacterium ASF500]
gi|569540432	58	48016	1	1	1	1	0.09	hypothetical protein NX02_01415 [Sphingomonas sanxanigenens DSM 19645 = NX02]
gi|684194802	55	8629	1	1	1	1	0.40	hypothetical protein O165_001440 [Pseudomonas mosselii SJ10]
gi|635285711	34	14625	1	1	1	1	0.33	hypothetical protein OU5_1377 [Pseudomonas mandelii JR-1]
gi|281497907	55	37817	1	1	1	1	0.12	hypothetical protein pah_c221o058 [Parachlamydia acanthamoebae str. Hall's coccus]
gi|281497907	73	37817	1	1	1	1	0.12	hypothetical protein pah_c221o058 [Parachlamydia acanthamoebae str. Hall's coccus]
gi|735691889	54	18331	1	1	1	1	0.25	hypothetical protein PT85_05225 [Pseudomonas tuomuerensis]
gi|550784143	59	23856	1	1	1	1	0.14	hypothetical protein Q671_12320 [Halomonas sp. PBN3]
gi|229323182	64	18605	1	1	1	1	0.25	hypothetical protein RHOER0001_6212 [Rhodococcus erythropolis SK121]
gi|654365480	33	40642	1	1	1	1	0.11	hypothetical protein RLPCCGM1_c2715 [Rhizobium leguminosarum bv. phaseoli CCGM1]
gi|567455173	26	7416	1	1	1	1	0.72	hypothetical protein T230_01405, partial [Tannerella sp. oral taxon BU063 isolate Cell 1/3]
gi|567448749	38	123042	2	2	1	1	0.03	hypothetical protein T230_10160 [Tannerella sp. oral taxon BU063 isolate Cell 1/3]
gi|258586883	60	11924	1	1	1	1	0.29	hypothetical protein VMD_15750 [Vibrio mimicus VM573]
gi|258586883	62	11924	1	1	1	1	0.41	hypothetical protein VMD_15750 [Vibrio mimicus VM573]
gi|583105555	58	18807	1	1	1	1	0.25	hypothetical protein W893_14860, partial [Staphylococcus aureus subsp. aureus ST 1413]
gi|663645406	68	14237	1	1	1	1	0.34	hypothetical protein, partial [Actinoplanes subtropicus]
gi|663645406	57	14237	1	1	1	1	0.34	hypothetical protein, partial [Actinoplanes subtropicus]
gi|663645406	68	14237	1	1	1	1	0.34	hypothetical protein, partial [Actinoplanes subtropicus]
gi|517129870	394	25258	11	11	1	1	0.13	hypothetical protein, partial [Bradyrhizobium sp. WSM2793]
gi|517129870	210	25258	7	7	1	1	0.13	hypothetical protein, partial [Bradyrhizobium sp. WSM2793]
gi|517129870	192	25258	5	5	1	1	0.18	hypothetical protein, partial [Bradyrhizobium sp. WSM2793]
gi|671511464	61	59543	1	1	1	1	0.06	hypothetical protein, partial [Bryobacter aggregatus]
gi|496573618	68	74494	4	4	1	1	0.06	hypothetical protein, partial [Erysipelotrichaceae bacterium 3_1_53]
gi|496573618	68	74494	1	1	1	1	0.06	hypothetical protein, partial [Erysipelotrichaceae bacterium 3_1_53]
gi|496573618	105	74494	5	5	1	1	0.06	hypothetical protein, partial [Erysipelotrichaceae bacterium 3_1_53]
gi|496573618	81	74494	3	3	2	2	0.09	hypothetical protein, partial [Erysipelotrichaceae bacterium 3_1_53]
gi|496573618	68	74494	1	1	1	1	0.06	hypothetical protein, partial [Erysipelotrichaceae bacterium 3_1_53]
gi|496573618	67	74494	1	1	1	1	0.06	hypothetical protein, partial [Erysipelotrichaceae bacterium 3_1_53]
gi|737620062	66	28911	1	1	1	1	0.16	hypothetical protein, partial [Halomonas sp. KM-1]
gi|736332971	68	10231	1	1	1	1	0.49	hypothetical protein, partial [Herbaspirillum rubrisubalbicans]
gi|736332971	89	10231	1	1	1	1	0.49	hypothetical protein, partial [Herbaspirillum rubrisubalbicans]
gi|736332858	87	11562	4	4	1	1	0.43	hypothetical protein, partial [Herbaspirillum rubrisubalbicans]
gi|648271262	100	18641	2	2	1	1	0.39	hypothetical protein, partial [Herbaspirillum rubrisubalbicans]
gi|648271262	122	18641	1	1	1	1	0.25	hypothetical protein, partial [Herbaspirillum rubrisubalbicans]
gi|648271264	52	14266	1	1	1	1	0.33	hypothetical protein, partial [Herbaspirillum rubrisubalbicans]
gi|736332858	2385	11562	108	108	1	1	0.43	hypothetical protein, partial [Herbaspirillum rubrisubalbicans]
gi|736333159	81	7818	2	2	2	2	1.83	hypothetical protein, partial [Herbaspirillum rubrisubalbicans]
gi|736332971	79	10231	1	1	1	1	0.49	hypothetical protein, partial [Herbaspirillum rubrisubalbicans]
gi|736332971	143	10231	4	4	1	1	0.49	hypothetical protein, partial [Herbaspirillum rubrisubalbicans]
gi|516023980	65	34317	2	2	2	2	0.20	hypothetical protein, partial [Herbaspirillum seropedicae]
gi|516024007	72	10564	1	1	1	1	0.33	hypothetical protein, partial [Herbaspirillum seropedicae]
gi|516024005	66	10040	2	2	1	1	0.82	hypothetical protein, partial [Herbaspirillum seropedicae]
gi|516023980	85	34317	1	1	1	1	0.13	hypothetical protein, partial [Herbaspirillum seropedicae]
gi|658444987	57	34762	1	1	1	1	0.13	hypothetical protein, partial [Hyphomicrobium sp. 802]
gi|490140652	55	13693	1	1	1	1	0.25	hypothetical protein, partial [Lactobacillus sp. ASF360]
gi|738141157	58	23586	1	1	1	1	0.19	hypothetical protein, partial [Listeria floridensis]
gi|657245298	65	27013	1	1	1	1	0.12	hypothetical protein, partial [Mesorhizobium ciceri]
gi|515772140	70	47764	1	1	1	1	0.07	hypothetical protein, partial [Microbacterium barkeri]
gi|686034920	58	22003	1	1	1	1	0.15	hypothetical protein, partial [Mycobacterium tuberculosis]
gi|497979074	74	3732	1	1	1	1	1.77	hypothetical protein, partial [Pectobacterium carotovorum]
gi|497979074	119	3732	2	2	2	2	6.66	hypothetical protein, partial [Pectobacterium carotovorum]
gi|665908022	58	7135	1	1	1	1	0.76	hypothetical protein, partial [Pelistega sp. HM-7]
gi|739033851	66	9103	2	2	2	2	1.44	hypothetical protein, partial [Proteus hauseri]
gi|739509180	73	14832	1	1	1	1	0.32	hypothetical protein, partial [Selenomonas ruminantium]
gi|739509180	72	14832	2	2	1	1	0.32	hypothetical protein, partial [Selenomonas ruminantium]
gi|658526198	74	82794	2	2	1	1	0.05	hypothetical protein, partial [Sphingomonas melonis]
gi|739697483	47	88113	1	1	1	1	0.05	hypothetical protein, partial [Sphingomonas sp. URHD0057]
gi|636934182	65	67701	1	1	1	1	0.06	hypothetical protein, partial [Streptococcus suis]
gi|664105986	61	387438	1	1	1	1	0.01	hypothetical protein, partial [Streptomyces rimosus]
gi|663366645	54	69488	1	1	1	1	0.06	hypothetical protein, partial [Streptomyces roseoverticillatus]
gi|518985150	59	78025	1	1	1	1	0.04	hypothetical protein, partial [Streptomyces sp. 351MFTsu5.1]
gi|654994983	68	49327	1	1	1	1	0.07	hypothetical protein, partial [Streptomyces sp. KhCrAH-40]
gi|654994983	50	49327	1	1	1	1	0.09	hypothetical protein, partial [Streptomyces sp. KhCrAH-40]
gi|664172294	53	12876	1	1	1	1	0.38	hypothetical protein, partial [Streptomyces sp. NRRL F-2580]
gi|740266465	52	40480	1	1	1	1	0.11	hypothetical protein, partial [Tolypothrix bouteillei]
gi|515998203	92	15140	3	3	2	2	0.50	hypothetical protein, partial [Vibrio vulnificus]
gi|515998203	64	15140	2	2	2	2	0.73	hypothetical protein, partial [Vibrio vulnificus]
gi|515998203	62	15140	1	1	1	1	0.32	hypothetical protein, partial [Vibrio vulnificus]
gi|505057619	84	22494	6	6	1	1	0.15	imidazoleglycerol-phosphate dehydratase [Singulisphaera acidiphila]
gi|505057619	72	22494	4	4	1	1	0.15	imidazoleglycerol-phosphate dehydratase [Singulisphaera acidiphila]
gi|505057619	74	22494	7	7	1	1	0.20	imidazoleglycerol-phosphate dehydratase [Singulisphaera acidiphila]
gi|505057619	66	22494	2	2	1	1	0.15	imidazoleglycerol-phosphate dehydratase [Singulisphaera acidiphila]
gi|489615722	148	16533	4	4	2	2	0.45	Immunoglobulin V-set domain protein, partial [Ruminiclostridium thermocellum]
gi|489615722	84	16533	1	1	1	1	0.28	Immunoglobulin V-set domain protein, partial [Ruminiclostridium thermocellum]
gi|652479101	60	77936	1	1	1	1	0.04	indolepyruvate ferredoxin oxidoreductase [Inquilinus limosus]
gi|652479101	65	77936	1	1	1	1	0.04	indolepyruvate ferredoxin oxidoreductase [Inquilinus limosus]
gi|652479101	62	77936	1	1	1	1	0.06	indolepyruvate ferredoxin oxidoreductase [Inquilinus limosus]
gi|652479101	60	77936	1	1	1	1	0.06	indolepyruvate ferredoxin oxidoreductase [Inquilinus limosus]
gi|652814045	41	64127	1	1	1	1	0.07	indolepyruvate ferredoxin oxidoreductase [Lachnospiraceae bacterium V9D3004]
gi|558089461	97	80226	1	1	1	1	0.05	inner membrane protein yccS [Enterobacter cloacae]
gi|490372200	52	51812	1	1	1	1	0.06	inosine-5'-monophosphate dehydrogenase [Thauera sp. 63]
gi|217038845	61	50477	1	1	1	1	0.07	inositol-3-phosphate synthase [Rubrobacter xylanophilus]
gi|217038845	64	50477	1	1	1	1	0.09	inositol-3-phosphate synthase [Rubrobacter xylanophilus]
gi|217038845	65	50477	1	1	1	1	0.09	inositol-3-phosphate synthase [Rubrobacter xylanophilus]
gi|499763183	48	46270	1	1	1	1	0.07	integrase [Novosphingobium aromaticivorans]
gi|385763779	110	14429	3	3	1	1	0.24	intracellular sulfur oxidation protein DsrE [uncultured bacterium ws643C1]
gi|744815803	51	20847	1	1	1	1	0.22	invasion antigen I [Campylobacter volucris LMG 24379]
gi|744815803	51	20847	1	1	1	1	0.22	invasion antigen I [Campylobacter volucris LMG 24379]
gi|504997115	58	50746	1	1	1	1	0.06	iron-regulated ABC transporter permease SufD [Microcoleus sp. PCC 7113]
gi|344167398	579	45828	10	10	1	1	0.07	Isocitrate dehydrogenase (NADP(+)) [blood disease bacterium R229]
gi|489718809	157	36807	6	6	2	2	0.26	isocitrate dehydrogenase [Acetobacter pasteurianus]
gi|518870113	350	45514	9	9	1	1	0.15	isocitrate dehydrogenase [gamma proteobacterium SCGC AAA076-D13]
gi|518870113	139	45514	4	4	1	1	0.15	isocitrate dehydrogenase [gamma proteobacterium SCGC AAA076-D13]
gi|499764206	81	46083	2	2	2	2	0.15	isocitrate dehydrogenase [Novosphingobium aromaticivorans]
gi|676257770	60	66671	1	1	1	1	0.07	isocitrate dehydrogenase kinase/phosphatase [Pseudomonas sp. StFLB209]
gi|522028532	65	17527	1	1	1	1	0.19	isoquinoline 1-oxidoreductase subunit alpha [Nonomuraea coxensis]
gi|522028532	63	17527	1	1	1	1	0.27	isoquinoline 1-oxidoreductase subunit alpha [Nonomuraea coxensis]
gi|522028532	57	17527	1	1	1	1	0.27	isoquinoline 1-oxidoreductase subunit alpha [Nonomuraea coxensis]
gi|522028532	57	17527	1	1	1	1	0.27	isoquinoline 1-oxidoreductase subunit alpha [Nonomuraea coxensis]
gi|522028532	61	17527	2	2	1	1	0.27	isoquinoline 1-oxidoreductase subunit alpha [Nonomuraea coxensis]
gi|655418185	37	43575	1	1	1	1	0.10	isovaleryl-CoA dehydrogenase [beta proteobacterium SCGC AAA027-K21]
gi|551346520	103	36521	1	1	1	1	0.09	ketol-acid reductoisomerase [Pseudomonas caeni]
gi|515135461	67	27577	1	1	1	1	0.16	kinase [Bacillus megaterium]
gi|503350381	64	36423	1	1	1	1	0.09	LacI family transcription regulator [Microbacterium testaceum]
gi|651382691	31	37373	1	1	1	1	0.09	LacI family transcriptional regulator [Butyrivibrio sp. WCD3002]
gi|497529684	62	15822	1	1	1	1	0.21	lactoylglutathione lyase [Vibrio sp. AND4]
gi|497529684	61	15822	1	1	1	1	0.30	lactoylglutathione lyase [Vibrio sp. AND4]
gi|493331843	57	75975	1	1	1	1	0.04	lantibiotic ABC transporter permease [Parascardovia denticolens]
gi|503160280	75	54895	1	1	1	1	0.08	L-aspartate oxidase [Achromobacter xylosoxidans]
gi|503160280	82	54895	2	2	1	1	0.08	L-aspartate oxidase [Achromobacter xylosoxidans]
gi|511286643	36	30180	1	1	1	1	0.15	Lipopolysaccharide biosynthesis proteins [Burkholderia sp. RPE64]
gi|499953320	60	87382	1	1	1	1	0.04	Lon protease [Nitrosomonas eutropha]
gi|657826296	110	56044	6	6	1	1	0.06	long-chain fatty acid--CoA ligase [Rhodococcus sp. BCP1]
gi|353777284	65	192898	1	1	1	1	0.02	LPXTG-motif cell wall anchor domain protein [Streptococcus pneumoniae GA44500]
gi|353777284	74	192898	2	2	1	1	0.02	LPXTG-motif cell wall anchor domain protein [Streptococcus pneumoniae GA44500]
gi|353777284	70	192898	1	1	1	1	0.02	LPXTG-motif cell wall anchor domain protein [Streptococcus pneumoniae GA44500]
gi|499127640	67	44538	1	1	1	1	0.07	L-seryl-tRNA(Sec) selenium transferase-related protein [Cyclobacteriaceae bacterium AK24]
gi|738278755	67	34132	2	2	1	1	0.13	LysR family transcriptional regulator [Massilia sp. JS1662]
gi|505287750	61	32283	1	1	1	1	0.14	LysR family transcriptional regulator [Pseudomonas denitrificans]
gi|505287750	61	32283	1	1	1	1	0.10	LysR family transcriptional regulator [Pseudomonas denitrificans]
gi|491463121	56	86841	1	1	1	1	0.05	magnesium or manganese-dependent protein phosphatase [Streptomyces pristinaespiralis]
gi|3201898	122	8768	2	2	2	2	1.53	major outer membrane lipoprotein I [Pseudomonas asplenii]
gi|3201898	141	8768	2	2	1	1	0.59	major outer membrane lipoprotein I [Pseudomonas asplenii]
gi|335389935	78	8928	2	2	2	2	1.50	major outer membrane lipoprotein I, partial [Pseudomonas balearica]
gi|495670242	60	41798	1	1	1	1	0.11	malate dehydrogenase [Clostridium sp. M62/1]
gi|495670242	53	41798	4	4	1	1	0.11	malate dehydrogenase [Clostridium sp. M62/1]
gi|488796447	77	43623	6	6	1	1	0.16	malate dehydrogenase [Thiothrix nivea]
gi|4566870	62	32119	1	1	1	1	0.14	malate dehydrogenase [Vibrio cholerae]
gi|502835122	56	84118	2	2	1	1	0.04	malic enzyme [Zunongwangia profunda]
gi|502835122	63	84118	5	5	1	1	0.04	malic enzyme [Zunongwangia profunda]
gi|502835122	59	84118	3	3	1	1	0.05	malic enzyme [Zunongwangia profunda]
gi|502835122	69	84118	2	2	1	1	0.05	malic enzyme [Zunongwangia profunda]
gi|692174315	70	33173	1	1	1	1	0.13	malonyl CoA-ACP transacylase [Necropsobacter rosorum]
gi|497309398	72	15563	2	2	1	1	0.22	MarR family transcriptional regulator [Pseudomonas sp. M1]
gi|504508432	49	21084	1	1	1	1	0.16	MCP methyltransferase/methylesterase, partial [Deinococcus gobiensis]
gi|499513303	55	26924	1	1	1	1	0.12	membrane protein [[Mannheimia] succiniciproducens]
gi|499513303	59	26924	2	2	1	1	0.17	membrane protein [[Mannheimia] succiniciproducens]
gi|499806273	51	61922	1	1	1	1	0.05	membrane protein [Burkholderia xenovorans]
gi|491436049	111	34583	9	9	1	1	0.10	membrane protein [Corynebacterium jeikeium]
gi|491436049	246	34583	16	16	1	1	0.10	membrane protein [Corynebacterium jeikeium]
gi|491436049	117	34583	13	13	1	1	0.13	membrane protein [Corynebacterium jeikeium]
gi|491436049	62	34583	1	1	1	1	0.10	membrane protein [Corynebacterium jeikeium]
gi|501179149	127	40378	3	3	1	1	0.11	membrane protein [Gluconacetobacter diazotrophicus]
gi|495472115	64	34835	1	1	1	1	0.13	membrane protein [Labrenzia alexandrii]
gi|657043005	48	113759	1	1	1	1	0.04	membrane protein [Pedobacter sp. R20-19]
gi|739033027	60	118541	2	2	1	1	0.04	membrane protein [Prevotella sp. FD3004]
gi|499746871	83	35775	3	3	1	1	0.12	membrane protein [Rhizobium etli]
gi|499746871	69	35775	1	1	1	1	0.12	membrane protein [Rhizobium etli]
gi|499746871	68	35775	1	1	1	1	0.12	membrane protein [Rhizobium etli]
gi|655891567	32	16000	2	2	1	1	0.21	membrane protein [Sphingomonas sp. URHD0057]
gi|493118125	58	25028	1	1	1	1	0.18	membrane protein [Streptococcus peroris]
gi|489076622	57	78671	2	2	1	1	0.09	membrane protein [Streptococcus pyogenes]
gi|493388458	42	27918	1	1	1	1	0.12	membrane protein [Streptomyces tsukubaensis]
gi|517770860	62	30038	1	1	1	1	0.15	membrane protein [Thioalkalivibrio sp. AKL11]
gi|739882445	55	30879	2	2	1	1	0.15	membrane protein, partial [Streptomyces sp. BoleA5]
gi|739882445	54	30879	1	1	1	1	0.15	membrane protein, partial [Streptomyces sp. BoleA5]
gi|495406526	92	12862	3	3	1	1	0.27	mercury transporter MerT [Pseudoalteromonas sp. BSi20480]
gi|655040716	68	65715	2	2	2	2	0.10	metallophosphatase [Thiothrix lacustris]
gi|654954551	59	218980	1	1	1	1	0.02	metallophosphoesterase [Bacillus sp. J13]
gi|654954551	97	218980	4	4	1	1	0.02	metallophosphoesterase [Bacillus sp. J13]
gi|654954551	87	218980	5	5	1	1	0.01	metallophosphoesterase [Bacillus sp. J13]
gi|654954551	69	218980	2	2	1	1	0.02	metallophosphoesterase [Bacillus sp. J13]
gi|654954551	85	218980	4	4	1	1	0.02	metallophosphoesterase [Bacillus sp. J13]
gi|494869020	63	32191	1	1	1	1	0.10	metallophosphoesterase [Bradyrhizobium sp. WSM1253]
gi|494869020	54	32191	1	1	1	1	0.14	metallophosphoesterase [Bradyrhizobium sp. WSM1253]
gi|639201131	47	31172	1	1	1	1	0.11	metalloprotease [Comamonas badia]
gi|639201131	54	31172	4	4	1	1	0.14	metalloprotease [Comamonas badia]
gi|546488777	58	55116	1	1	1	1	0.08	metalloprotease yebA [Clostridium sp. CAG:1193]
gi|223717934	106	45267	1	1	1	1	0.07	methane monooxygenase protein B [Methylomarinum vadi]
gi|492375028	91	28259	1	1	1	1	0.16	methanol dehydrogenase [Actinobacillus minor]
gi|516410008	45	76006	1	1	1	1	0.06	methionyl-tRNA synthetase [Erwinia toletana]
gi|516410008	51	76006	1	1	1	1	0.06	methionyl-tRNA synthetase [Erwinia toletana]
gi|588476233	35	76391	1	1	1	1	0.04	methionyl-tRNA synthetase [Lactobacillus composti JCM 14202]
gi|489470219	40	78206	1	1	1	1	0.04	methyl-accepting chemotaxis protein [Clostridium botulinum]
gi|312172709	63	57468	2	2	1	1	0.06	Methyl-accepting chemotaxis protein I [Erwinia amylovora ATCC BAA-2158]
gi|684611079	17	42931	1	1	1	1	0.08	methyl-accepting chemotaxis protein I [Vibrio maritimus]
gi|504122678	47	95511	1	1	1	1	0.05	methyl-accepting chemotaxis transducer protein [Acetobacterium woodii]
gi|648618195	36	58944	1	1	1	1	0.06	methylcrotonoyl-CoA carboxylase [Niabella aurantiaca]
gi|488855123	71	36512	2	2	1	1	0.09	methyltransferase [Microcystis aeruginosa]
gi|492907929	68	22551	1	1	1	1	0.15	methyltransferase type 12 [Paenibacillus curdlanolyticus]
gi|494444528	69	40911	1	1	1	1	0.11	MFS transporter [Gordonia otitidis]
gi|503680476	44	51568	1	1	1	1	0.06	MFS transporter [Paenibacillus mucilaginosus]
gi|495650060	63	43680	1	1	1	1	0.08	MFS transporter [Pseudomonas sp. M47T1]
gi|495650060	70	43680	1	1	1	1	0.10	MFS transporter [Pseudomonas sp. M47T1]
gi|59149966	46	24092	2	2	1	1	0.19	modular polyketide synthase [uncultured bacterium]
gi|515485377	55	24934	1	1	1	1	0.18	molecular chaperone DnaJ [Methylocystis parvus]
gi|499636027	155	68296	5	5	3	3	0.26	molecular chaperone DnaK [Anabaena variabilis]
gi|657673168	65	68085	1	1	1	1	0.05	molecular chaperone DnaK [Dehalococcoidia bacterium SCGC AB-539-J10]
gi|648547635	181	69143	3	3	3	3	0.15	molecular chaperone DnaK [Frankia sp. BCU110501]
gi|494045502	171	69252	4	4	3	3	0.20	molecular chaperone DnaK [Gillisia limnaea]
gi|499659025	63	68675	1	1	1	1	0.05	molecular chaperone DnaK [Pelobacter carbinolicus]
gi|652380996	137	68258	2	2	2	2	0.10	molecular chaperone DnaK [Polaribacter sp. Hel_I_88]
gi|493168865	151	68473	3	3	2	2	0.15	molecular chaperone DnaK [Synechococcus sp. WH 5701]
gi|655039187	138	68818	3	3	1	1	0.05	molecular chaperone DnaK [Thiothrix lacustris]
gi|488794990	131	68813	1	1	1	1	0.05	molecular chaperone DnaK [Thiothrix nivea]
gi|488794990	185	68813	1	1	1	1	0.06	molecular chaperone DnaK [Thiothrix nivea]
gi|693061400	122	17316	3	3	2	2	0.71	molecular chaperone DnaK, partial [Escherichia coli]
gi|494110219	4741	57767	128	128	1	1	0.12	molecular chaperone GroEL [Anaerofustis stercorihominis]
gi|494110219	2714	57767	105	105	1	1	0.06	molecular chaperone GroEL [Anaerofustis stercorihominis]
gi|648617414	282	57629	9	9	2	2	0.12	molecular chaperone GroEL [Kangiella aquimarina]
gi|648617414	113	57629	1	1	1	1	0.06	molecular chaperone GroEL [Kangiella aquimarina]
gi|648617414	98	57629	1	1	1	1	0.08	molecular chaperone GroEL [Kangiella aquimarina]
gi|502020732	623	57394	55	55	4	4	0.48	molecular chaperone GroEL [Laribacter hongkongensis]
gi|570731452	543	57708	52	52	4	4	0.47	molecular chaperone GroEL [Marichromatium purpuratum 984]
gi|570731452	60	57708	1	1	1	1	0.06	molecular chaperone GroEL [Marichromatium purpuratum 984]
gi|499797998	569	57326	52	52	4	4	0.48	molecular chaperone GroEL [Methylobacillus flagellatus]
gi|499661816	420	58561	44	44	3	3	0.39	molecular chaperone GroEL [Pelobacter carbinolicus]
gi|516563461	809	56700	65	65	5	5	0.66	molecular chaperone GroEL [Pseudomonas thermotolerans]
gi|499707611	167	57646	9	9	2	2	0.12	molecular chaperone GroEL [Rhodospirillum rubrum]
gi|517801423	46	57532	1	1	1	1	0.06	molecular chaperone GroEL [Rudaea cellulosilytica]
gi|491553635	387	57339	16	16	3	3	0.25	molecular chaperone GroEL [Stenotrophomonas maltophilia]
gi|517777869	2905	58453	114	114	2	2	0.12	molecular chaperone GroEL [Thioalkalivibrio sp. ALMg11]
gi|655039016	13394	57324	378	378	14	14	2.42	molecular chaperone GroEL [Thiothrix lacustris]
gi|655039016	4735	57324	246	246	7	7	0.65	molecular chaperone GroEL [Thiothrix lacustris]
gi|655039016	776	57324	13	13	7	7	0.75	molecular chaperone GroEL [Thiothrix lacustris]
gi|655039016	446	57324	5	5	3	3	0.25	molecular chaperone GroEL [Thiothrix lacustris]
gi|488797689	764	57257	65	65	4	4	0.34	molecular chaperone GroEL [Thiothrix nivea]
gi|655039015	370	10520	33	33	3	3	3.13	molecular chaperone GroES [Thiothrix lacustris]
gi|504371781	184	73867	3	3	2	2	0.09	molecular chaperone Hsp90 [Ignavibacterium album]
gi|488630254	52	43072	1	1	1	1	0.08	molybdenum cofactor synthesis domain-containing protein [[Clostridium] bolteae]
gi|688466472	76	17880	2	2	1	1	0.41	MraZ protein [Sphingobacterium sp. ACCC 05744]
gi|379981706	44	78701	1	1	1	1	0.06	Multimodular transpeptidase-transglycosylase [Streptococcus pyogenes NS88.2]
gi|502589280	36	106415	1	1	1	1	0.03	multi-sensor hybrid histidine kinase [Haliangium ochraceum]
gi|527040164	58	60808	1	1	1	1	0.05	multi-sensor signal transduction histidine kinase [Desulfovibrio alkalitolerans]
gi|502794486	53	123709	1	1	1	1	0.03	multi-sensor signal transduction histidine kinase [Sideroxydans lithotrophicus]
gi|446081568	65	36038	1	1	1	1	0.12	MULTISPECIES: 16S rRNA methyltransferase [Streptococcus]
gi|489608108	57	71454	1	1	1	1	0.05	MULTISPECIES: 2', 3'-cyclic nucleotide 2'-phosphodiesterase [Agrobacterium]
gi|488437598	66	13752	2	2	1	1	0.25	MULTISPECIES: 30S ribosomal protein S13 [Staphylococcus]
gi|488437598	62	13752	2	2	1	1	0.35	MULTISPECIES: 30S ribosomal protein S13 [Staphylococcus]
gi|489498366	82	17562	1	1	1	1	0.27	MULTISPECIES: 3-hydroxyacyl-ACP dehydratase [Mycobacterium tuberculosis complex]
gi|489184261	54	12700	1	1	1	1	0.38	MULTISPECIES: 50S ribosomal protein L18 [Pseudomonas]
gi|489184311	73	12472	1	1	1	1	0.39	MULTISPECIES: 50S ribosomal protein L7/L12 [Pseudomonas]
gi|489348387	63	12592	1	1	1	1	0.39	MULTISPECIES: 50S ribosomal protein L7/L12 [Pseudomonas]
gi|487750403	28	9580	1	1	1	1	0.36	MULTISPECIES: 50S ribosomal protein L7/L12 [Staphylococcus]
gi|500833861	41	36054	1	1	1	1	0.12	MULTISPECIES: ABC transporter substrate-binding protein [Thermotoga]
gi|489376944	72	8693	2	2	2	2	1.55	MULTISPECIES: acyl carrier protein [Pseudomonadaceae]
gi|545908471	79	8664	2	2	2	2	1.55	MULTISPECIES: acyl carrier protein [Pseudomonas putida group]
gi|495195888	57	34352	1	1	1	1	0.13	MULTISPECIES: agmatinase [Pseudomonas]
gi|563530814	57	41951	1	1	1	1	0.11	MULTISPECIES: aminotransferase DegT [Mesorhizobium]
gi|563530814	50	41951	1	1	1	1	0.08	MULTISPECIES: aminotransferase DegT [Mesorhizobium]
gi|563530814	50	41951	2	2	1	1	0.11	MULTISPECIES: aminotransferase DegT [Mesorhizobium]
gi|494110471	32	31977	1	1	1	1	0.14	MULTISPECIES: asparaginase [Bifidobacterium]
gi|488626098	64	21444	1	1	1	1	0.16	MULTISPECIES: ATP synthase F0, B subunit [Atopobium]
gi|495918037	55	74150	1	1	1	1	0.06	MULTISPECIES: conjugal transfer coupling protein TraG [Burkholderiales]
gi|494962102	68	13506	1	1	1	1	0.25	MULTISPECIES: cytochrome C [Sphingobium]
gi|492792589	128	76533	7	7	1	1	0.09	MULTISPECIES: elongation factor P [sulfur-oxidizing symbionts]
gi|491450020	561	51856	37	37	1	1	0.20	MULTISPECIES: glutamine synthetase [Aeromonas]
gi|652390201	54	21028	1	1	1	1	0.16	MULTISPECIES: guanylate kinase [Planktothrix]
gi|489721486	60	10594	1	1	1	1	0.47	MULTISPECIES: hypothetical protein [Acetobacter]
gi|490785670	60	31614	1	1	1	1	0.14	MULTISPECIES: hypothetical protein [Acinetobacter]
gi|446825917	59	28596	1	1	1	1	0.12	MULTISPECIES: hypothetical protein [Bacillus cereus group]
gi|503833092	44	43614	1	1	1	1	0.08	MULTISPECIES: hypothetical protein [Bacteria]
gi|499396942	84	88622	4	4	1	1	0.05	MULTISPECIES: hypothetical protein [Bradyrhizobium]
gi|499396942	83	88622	5	5	1	1	0.04	MULTISPECIES: hypothetical protein [Bradyrhizobium]
gi|499396942	59	88622	1	1	1	1	0.04	MULTISPECIES: hypothetical protein [Bradyrhizobium]
gi|499396942	61	88622	2	2	1	1	0.05	MULTISPECIES: hypothetical protein [Bradyrhizobium]
gi|489632490	40	53082	1	1	1	1	0.08	MULTISPECIES: hypothetical protein [Erysipelotrichaceae]
gi|494600023	65	11043	1	1	1	1	0.31	MULTISPECIES: hypothetical protein [Kamptonema]
gi|494600023	59	11043	1	1	1	1	0.45	MULTISPECIES: hypothetical protein [Kamptonema]
gi|652397651	107	28571	2	2	1	1	0.12	MULTISPECIES: hypothetical protein [Planktothrix]
gi|652397651	89	28571	1	1	1	1	0.16	MULTISPECIES: hypothetical protein [Planktothrix]
gi|551153852	67	12174	1	1	1	1	0.28	MULTISPECIES: hypothetical protein [Poribacteria]
gi|517347191	53	45824	1	1	1	1	0.07	MULTISPECIES: hypothetical protein [Streptomyces]
gi|517700784	69	21259	1	1	1	1	0.16	MULTISPECIES: hypothetical protein [Thioalkalivibrio]
gi|495676233	46	47997	1	1	1	1	0.07	MULTISPECIES: imidazole glycerol phosphate synthase [Clostridium]
gi|489180756	71	15731	1	1	1	1	0.22	MULTISPECIES: MerR family transcriptional regulator [Proteobacteria]
gi|494665535	47	16662	1	1	1	1	0.20	MULTISPECIES: metalloprotease [Acidiphilium]
gi|490977423	68	16754	1	1	1	1	0.20	MULTISPECIES: methionine sulfoxide reductase B [Anaerococcus]
gi|490977423	63	16754	1	1	1	1	0.28	MULTISPECIES: methionine sulfoxide reductase B [Anaerococcus]
gi|490977423	60	16754	2	2	1	1	0.28	MULTISPECIES: methionine sulfoxide reductase B [Anaerococcus]
gi|491516827	734	57655	30	30	3	3	0.18	MULTISPECIES: molecular chaperone GroEL [Methylomicrobium]
gi|491516827	79	57655	1	1	1	1	0.06	MULTISPECIES: molecular chaperone GroEL [Methylomicrobium]
gi|491516827	50	57655	2	2	1	1	0.08	MULTISPECIES: molecular chaperone GroEL [Methylomicrobium]
gi|495827634	68	57801	1	1	1	1	0.08	MULTISPECIES: molecular chaperone GroEL [Pseudovibrio]
gi|495827634	141	57801	1	1	1	1	0.06	MULTISPECIES: molecular chaperone GroEL [Pseudovibrio]
gi|495827634	119	57801	1	1	1	1	0.08	MULTISPECIES: molecular chaperone GroEL [Pseudovibrio]
gi|522139861	439	57227	44	44	3	3	0.40	MULTISPECIES: molecular chaperone GroEL [Solimonas]
gi|495650428	57	24414	1	1	1	1	0.19	MULTISPECIES: O-methyltransferase [Coprococcus]
gi|490079735	59	28511	3	3	1	1	0.16	MULTISPECIES: peptidase S1 and S6 chymotrypsin/Hap [Streptomyces]
gi|496240588	60	19848	1	1	1	1	0.17	MULTISPECIES: phage tail protein [Pseudogulbenkiania]
gi|494776659	78	37293	2	2	1	1	0.09	MULTISPECIES: phenylalanyl-tRNA synthetase [Rhodanobacter]
gi|498160342	48	56522	1	1	1	1	0.08	MULTISPECIES: photosystem II PsbB protein [Acaryochloris]
gi|489907039	61	16536	1	1	1	1	0.20	MULTISPECIES: polyketide cyclase [Bordetella]
gi|494497123	63	38086	1	1	1	1	0.09	MULTISPECIES: rod shape-determining protein Mbl [Clostridiales]
gi|446458995	53	28695	1	1	1	1	0.16	MULTISPECIES: SanA protein [Vibrio]
gi|516870489	70	24445	1	1	1	1	0.19	MULTISPECIES: thymidylate kinase [Thioalkalivibrio]
gi|489082360	48	80538	1	1	1	1	0.04	MULTISPECIES: TonB-denpendent receptor [Myroides]
gi|489578876	34	102980	1	1	1	1	0.03	MULTISPECIES: TonB-dependent receptor [Xanthomonas]
gi|488811005	70	81867	1	1	1	1	0.04	MULTISPECIES: toprim domain protein [Leptospira]
gi|546198762	48	48481	1	1	1	1	0.09	MULTISPECIES: UDP-N-acetylglucosamine 1-carboxyvinyltransferase [Bacteria]
gi|494915124	50	28046	1	1	1	1	0.16	myo-inositol-1(or 4)-monophosphatase [Glaciecola psychrophila]
gi|494915124	61	28046	1	1	1	1	0.16	myo-inositol-1(or 4)-monophosphatase [Glaciecola psychrophila]
gi|494915124	61	28046	1	1	1	1	0.16	myo-inositol-1(or 4)-monophosphatase [Glaciecola psychrophila]
gi|495616155	38	51465	1	1	1	1	0.09	N-acetylglucosamine-1-phosphate uridyltransferase [Alicyclobacillus acidocaldarius]
gi|487393224	51	32416	1	1	1	1	0.10	N-acetylmuramic acid 6-phosphate etherase [Staphylococcus aureus]
gi|646859420	59	36607	1	1	1	1	0.12	NAD-dependent dehydratase [Burkholderia sp. WSM2230]
gi|501383826	59	72306	1	1	1	1	0.06	NAD-dependent DNA ligase LigA [Elusimicrobium minutum]
gi|678277180	59	36517	2	2	1	1	0.12	NADH-quinone oxidoreductase subunit H [Criblamydia sequanensis CRIB-18]
gi|544830055	54	49709	1	1	1	1	0.07	N-formimino-L-glutamate deiminase [Sphingobium baderi]
gi|490513339	64	62670	1	1	1	1	0.05	nickel-dependent hydrogenase large subunit [Thauera phenylacetica]
gi|692533790	95	11847	1	1	1	1	0.29	nicotinate phosphoribosyltransferase, partial [Acinetobacter sp. MII]
gi|499950128	62	48980	1	1	1	1	0.09	nitrate ABC transporter ATP-binding protein [Granulibacter bethesdensis]
gi|508730864	54	71042	1	1	1	1	0.05	Nitric oxide reductase activation protein [Oleispira antarctica RB-8]
gi|159882975	62	111321	1	1	1	1	0.04	nitrite reductase (NAD(P)H) large subunit [Hydrogenivirga sp. 128-5-R1-1]
gi|490583273	57	12710	1	1	1	1	0.38	nitrogen fixation protein NifW [Methylosinus trichosporium]
gi|490583273	62	12710	1	1	1	1	0.38	nitrogen fixation protein NifW [Methylosinus trichosporium]
gi|490583273	66	12710	1	1	1	1	0.38	nitrogen fixation protein NifW [Methylosinus trichosporium]
gi|647221152	61	12534	1	1	1	1	0.39	nitrogen regulatory protein P-II [Salinivibrio socompensis]
gi|655493543	147	12362	3	3	2	2	0.63	nitrogen regulatory protein P-II 1 [Tepidiphilus margaritifer]
gi|654248706	55	58448	1	1	1	1	0.06	nitroreductase [Streptomyces sp. CNS606]
gi|599565070	61	82820	1	1	1	1	0.04	Non-specific protein-tyrosine kinase [Chondromyces apiculatus DSM 436]
gi|489226251	64	15379	2	2	2	2	0.49	nucleoside diphosphate kinase [Lactococcus garvieae]
gi|488795006	239	15654	6	6	2	2	0.80	nucleoside diphosphate kinase [Thiothrix nivea]
gi|488800281	51	46614	2	2	1	1	0.07	nucleotide sugar dehydrogenase [Afipia clevelandensis]
gi|494948505	118	23561	10	10	2	2	0.70	NUDIX hydrolase [alpha proteobacterium BAL199]
gi|655039600	52	45735	1	1	1	1	0.07	O-acetylhomoserine aminocarboxypropyltransferase [Thiothrix lacustris]
gi|488795105	71	45939	1	1	1	1	0.07	O-acetylhomoserine aminocarboxypropyltransferase [Thiothrix nivea]
gi|500052008	55	66792	1	1	1	1	0.07	oligoendopeptidase F [Campylobacter fetus]
gi|126215002	114	7581	2	2	2	2	1.91	OprI protein [Pseudomonas fluorescens]
gi|496369282	65	55961	1	1	1	1	0.08	O-succinylbenzoate-CoA ligase [Streptomyces sp. AA4]
gi|584595666	56	25442	1	1	1	1	0.13	outer membrane lipoprotein-sorting protein [Holospora obtusa]
gi|547257021	61	18261	1	1	1	1	0.25	outer membrane protein [Prevotella sp. CAG:487]
gi|547257021	59	18261	1	1	1	1	0.25	outer membrane protein [Prevotella sp. CAG:487]
gi|494020782	56	11634	1	1	1	1	0.42	Outer membrane protein A precursor [Sphingobium japonicum]
gi|655366198	67	92693	1	1	1	1	0.04	outer membrane protein assembly protein YaeT [Shewanella waksmanii]
gi|499469983	40	80226	1	1	1	1	0.04	outer membrane protein TonB-dependent receptor [Rhodopseudomonas palustris]
gi|499738624	48	48779	1	1	1	1	0.07	oxidoreductase [Anaeromyxobacter dehalogenans]
gi|292826548	33	106876	1	1	1	1	0.04	oxoglutarate dehydrogenase (succinyl-transferring), E1 component [Acinetobacter sp. SH024]
gi|292826548	48	106876	2	2	1	1	0.03	oxoglutarate dehydrogenase (succinyl-transferring), E1 component [Acinetobacter sp. SH024]
gi|292826548	52	106876	2	2	1	1	0.04	oxoglutarate dehydrogenase (succinyl-transferring), E1 component [Acinetobacter sp. SH024]
gi|503030464	59	29540	1	1	1	1	0.15	pantothenate kinase [Prevotella melaninogenica]
gi|503030464	79	29540	3	3	1	1	0.15	pantothenate kinase [Prevotella melaninogenica]
gi|503030464	62	29540	1	1	1	1	0.15	pantothenate kinase [Prevotella melaninogenica]
gi|503030464	67	29540	1	1	1	1	0.15	pantothenate kinase [Prevotella melaninogenica]
gi|503030464	64	29540	2	2	1	1	0.15	pantothenate kinase [Prevotella melaninogenica]
gi|501492107	72	91121	2	2	1	1	0.05	PAS/PAC sensor hybrid histidine kinase [Chloroherpeton thalassium]
gi|501492107	67	91121	1	1	1	1	0.05	PAS/PAC sensor hybrid histidine kinase [Chloroherpeton thalassium]
gi|501492107	57	91121	2	2	1	1	0.05	PAS/PAC sensor hybrid histidine kinase [Chloroherpeton thalassium]
gi|505826157	56	53477	1	1	1	1	0.08	PEGA domain-containing protein [Treponema azotonutricium]
gi|143042	26	65671	2	2	1	1	0.05	penicillin-binding protein 1A, partial [Bacillus subtilis]
gi|564795808	98	63242	5	5	1	1	0.05	Penicillin-binding protein 2 [Parcubacteria bacterium RAAC4_OD1_1]
gi|564795808	66	63242	1	1	1	1	0.07	Penicillin-binding protein 2 [Parcubacteria bacterium RAAC4_OD1_1]
gi|564795808	70	63242	4	4	1	1	0.07	Penicillin-binding protein 2 [Parcubacteria bacterium RAAC4_OD1_1]
gi|547851930	55	74268	1	1	1	1	0.04	penicillin-binding protein transpeptidase domain protein [Eubacterium sp. CAG:251]
gi|491633836	75	55178	5	5	1	1	0.06	peptidase M17, leucyl aminopeptidase [Pseudoalteromonas luteoviolacea]
gi|489742847	62	49148	1	1	1	1	0.07	peptidase M20 [Lactobacillus gasseri]
gi|503842155	63	59034	2	2	1	1	0.07	peptidase S10 [Sphingobium sp. SYK-6]
gi|503842155	59	59034	3	3	1	1	0.07	peptidase S10 [Sphingobium sp. SYK-6]
gi|496427523	77	122469	4	4	1	1	0.03	peptidase S41 [Odoribacter laneus]
gi|496427523	72	122469	2	2	1	1	0.04	peptidase S41 [Odoribacter laneus]
gi|494479648	56	10101	1	1	1	1	0.50	peptide carrier protein [Streptomyces sp. C]
gi|668670387	78	40644	2	2	1	1	0.08	Peptide chain release factor 1 [Candidatus Accumulibacter sp. SK-01]
gi|668670387	81	40644	2	2	1	1	0.11	Peptide chain release factor 1 [Candidatus Accumulibacter sp. SK-01]
gi|489271102	45	402674	1	1	1	1	0.01	peptide synthetase [Bacillus licheniformis]
gi|500091774	65	30376	1	1	1	1	0.11	peptide transporter [Mycobacterium sp. KMS]
gi|494821420	66	81580	1	1	1	1	0.04	peptidoglycan binding protein [Candidatus Liberibacter americanus]
gi|494821420	59	81580	1	1	1	1	0.05	peptidoglycan binding protein [Candidatus Liberibacter americanus]
gi|489334480	120	20133	4	4	1	1	0.17	peptidyl-prolyl cis-trans isomerase [Pseudomonas mendocina]
gi|840840	74	16600	4	4	1	1	0.74	peptidylprolyl cis-trans isomerase a [Pseudomonas aeruginosa PAO1]
gi|488795873	87	63494	2	2	1	1	0.05	periplasmic glucan biosynthesis protein MdoG [Thiothrix nivea]
gi|491142120	58	24021	1	1	1	1	0.14	peroxidase [Nitrococcus mobilis]
gi|489719410	95	15222	3	3	1	1	0.31	peroxiredoxin [Acetobacter pasteurianus]
gi|505186085	45	27861	1	1	1	1	0.12	phage integrase family protein [Pseudomonas poae]
gi|505186085	46	27861	1	1	1	1	0.16	phage integrase family protein [Pseudomonas poae]
gi|505186085	58	27861	1	1	1	1	0.16	phage integrase family protein [Pseudomonas poae]
gi|571050569	56	42058	1	1	1	1	0.08	phage portal protein [uncultured bacterium Contig1770]
gi|498160018	79	42182	2	2	1	1	0.10	phage tail protein [Streptomyces somaliensis]
gi|498160018	58	42182	1	1	1	1	0.08	phage tail protein [Streptomyces somaliensis]
gi|498160018	70	42182	1	1	1	1	0.10	phage tail protein [Streptomyces somaliensis]
gi|498160018	65	42182	1	1	1	1	0.10	phage tail protein [Streptomyces somaliensis]
gi|527041109	20	37844	1	1	1	1	0.12	phage-related hypothetical protein [Desulfovibrio alkalitolerans]
gi|2244640	54	52772	1	1	1	1	0.06	phenylacetaldehyde dehydrogenase [Escherichia coli K-12]
gi|587774724	37	36017	1	1	1	1	0.09	phenylacetic acid degradation protein paaA [Acinetobacter baumannii 348935]
gi|652527020	40	60019	1	1	1	1	0.05	PhoH protein [Glomeribacter sp. 1016415]
gi|655111222	52	26529	1	1	1	1	0.17	PhoP family transcriptional regulator [Paenibacillus pinihumi]
gi|515604252	58	17817	1	1	1	1	0.26	phosphatase [Vibrio genomosp. F10]
gi|654867946	354	37911	14	14	2	2	0.29	phosphate ABC transporter substrate-binding protein [Desulfatiglans anilini]
gi|654867946	62	37911	5	5	2	2	0.18	phosphate ABC transporter substrate-binding protein [Desulfatiglans anilini]
gi|494438032	3322	38086	199	199	1	1	0.18	phosphate ABC transporter substrate-binding protein [gamma proteobacterium HTCC2207]
gi|494438032	953	38086	80	80	1	1	0.18	phosphate ABC transporter substrate-binding protein [gamma proteobacterium HTCC2207]
gi|494438032	311	38086	40	40	1	1	0.12	phosphate ABC transporter substrate-binding protein [gamma proteobacterium HTCC2207]
gi|550662468	48	34090	1	1	1	1	0.10	phosphate ABC transporter substrate-binding protein [Labrenzia sp. C1B10]
gi|654839622	41	37297	1	1	1	1	0.09	phosphate ABC transporter substrate-binding protein [Oceanobacter kriegii]
gi|655040724	2652	36717	84	84	9	9	1.58	phosphate ABC transporter substrate-binding protein [Thiothrix lacustris]
gi|655039219	1821	38591	74	74	6	6	0.64	phosphate ABC transporter substrate-binding protein [Thiothrix lacustris]
gi|655039219	2308	38591	75	75	5	5	0.64	phosphate ABC transporter substrate-binding protein [Thiothrix lacustris]
gi|655040724	322	36717	17	17	6	6	0.68	phosphate ABC transporter substrate-binding protein [Thiothrix lacustris]
gi|655039219	2023	38591	87	87	2	2	0.24	phosphate ABC transporter substrate-binding protein [Thiothrix lacustris]
gi|655040724	26	36717	1	1	1	1	0.12	phosphate ABC transporter substrate-binding protein [Thiothrix lacustris]
gi|488795074	760	36937	52	52	6	6	0.82	phosphate ABC transporter substrate-binding protein [Thiothrix nivea]
gi|488794787	335	38578	29	29	2	2	0.18	phosphate ABC transporter substrate-binding protein [Thiothrix nivea]
gi|502683502	60	96541	1	1	1	1	0.04	phosphoenolpyruvate carboxylase [Kribbella flavida]
gi|488797481	55	107565	1	1	1	1	0.03	phosphoenolpyruvate carboxylase [Thiothrix nivea]
gi|493568143	55	37536	1	1	1	1	0.09	Phosphoglycerate dehydrogenase [Desulfotomaculum gibsoniae]
gi|652568934	113	41781	3	3	2	2	0.26	phosphoglycerate kinase [Alicyclobacillus herbarius]
gi|495153825	309	41573	4	4	1	1	0.08	phosphoglycerate kinase [Herbaspirillum sp. CF444]
gi|495153825	40	41573	1	1	1	1	0.08	phosphoglycerate kinase [Herbaspirillum sp. CF444]
gi|494982489	71	20756	1	1	1	1	0.22	phosphoglycerate mutase [Sphingobium sp. AP49]
gi|516264783	74	25107	2	2	2	2	0.28	phosphoglyceromutase [Sandarakinorhabdus sp. AAP62]
gi|655040518	48	50424	1	1	1	1	0.07	phosphomannomutase [Thiothrix lacustris]
gi|501841704	58	32186	1	1	1	1	0.10	phosphonate ABC transporter substrate-binding protein [Agrobacterium vitis]
gi|653063400	96	33248	1	1	1	1	0.10	phosphonate ABC transporter substrate-binding protein [Microvirga flocculans]
gi|489138552	64	25638	1	1	1	1	0.13	phosphopantothenate--cysteine ligase [Streptococcus canis]
gi|490133681	50	46948	1	1	1	1	0.07	phosphoribosylamine-glycine ligase [Clostridium sp. ASF356]
gi|655040823	24	45073	1	1	1	1	0.07	phosphoribosylamine--glycine ligase [Thiothrix lacustris]
gi|495725187	63	139563	2	2	2	2	0.06	phosphoribosylformylglycinamidine synthase [Prevotella amnii]
gi|521996483	93	33280	1	1	1	1	0.10	phosphoribulokinase [Lamprocystis purpurea]
gi|551355893	91	32868	2	2	2	2	0.21	phosphoribulokinase [Nevskia ramosa]
gi|488796584	134	34374	3	3	3	3	0.32	phosphoribulokinase [Thiothrix nivea]
gi|495251689	57	39349	1	1	1	1	0.08	phosphorylcholine phosphatase [Pseudomonas sp. GM33]
gi|495251689	57	39349	1	1	1	1	0.11	phosphorylcholine phosphatase [Pseudomonas sp. GM33]
gi|505068112	70	31468	4	4	1	1	0.11	phosphotransferase [Thermobacillus composti]
gi|91208927	56	56201	1	1	1	1	0.08	photosystem II 47 kDa protein [Gossypium hirsutum]
gi|503032735	81	97114	5	5	1	1	0.03	PII uridylyl-transferase [Brevundimonas subvibrioides]
gi|503032735	109	97114	4	4	1	1	0.04	PII uridylyl-transferase [Brevundimonas subvibrioides]
gi|503032735	63	97114	2	2	1	1	0.04	PII uridylyl-transferase [Brevundimonas subvibrioides]
gi|516032161	57	71714	1	1	1	1	0.05	pilus biogenesis protein [Dyella ginsengisoli]
gi|493100354	66	46858	3	3	1	1	0.09	PKS protein [Streptomyces gancidicus]
gi|659893265	43	63910	1	1	1	1	0.07	poly(R)-hydroxyalkanoic acid synthase [Sphingomonas astaxanthinifaciens]
gi|493952112	50	81923	1	1	1	1	0.05	polyphosphate kinase [Gordonia sihwensis]
gi|630776599	56	81598	1	1	1	1	0.04	polyphosphate kinase [Hyphomonas sp. BH-BN04-4]
gi|495984064	44	72808	1	1	1	1	0.05	potassium-transporting ATPase subunit B [Synergistes sp. 3_1_syn1]
gi|672976258	58	36076	1	1	1	1	0.12	Ppx/GppA phosphatase [Bifidobacterium merycicum]
gi|672976258	74	36076	1	1	1	1	0.09	Ppx/GppA phosphatase [Bifidobacterium merycicum]
gi|672976258	77	36076	1	1	1	1	0.12	Ppx/GppA phosphatase [Bifidobacterium merycicum]
gi|491127211	49	33381	1	1	1	1	0.13	predicted protein [Streptomyces ghanaensis]
gi|495754788	78	29510	1	1	1	1	0.15	preprotein translocase subunit TatC [Nitrolancea hollandica]
gi|488797110	66	36555	1	1	1	1	0.09	proline iminopeptidase [Thiothrix nivea]
gi|489435953	81	30065	1	1	1	1	0.11	prolipoprotein diacylglyceryl transferase [Brevibacillus laterosporus]
gi|654911774	57	49068	1	1	1	1	0.07	propionyl-CoA carboxylase [Burkholderia sp. JPY366]
gi|654911774	69	49068	3	3	1	1	0.09	propionyl-CoA carboxylase [Burkholderia sp. JPY366]
gi|654911774	61	49068	1	1	1	1	0.09	propionyl-CoA carboxylase [Burkholderia sp. JPY366]
gi|654911774	56	49068	1	1	1	1	0.09	propionyl-CoA carboxylase [Burkholderia sp. JPY366]
gi|497066964	64	58808	1	1	1	1	0.06	protein of unknown function DUF324 [Fischerella sp. JSC-11]
gi|488795225	118	66452	1	1	1	1	0.05	protein of unknown function DUF839 [Thiothrix nivea]
gi|488860579	44	102107	1	1	1	1	0.04	protein serine/threonine phosphatase with GAF(s) sensor(s) [Leptonema illini]
gi|345394693	62	5814	1	1	1	1	0.99	protein traW domain protein [Escherichia coli TX1999]
gi|503135193	60	48403	1	1	1	1	0.09	protein-tyrosine phosphatase [Paenibacillus polymyxa]
gi|666641416	43	68755	1	1	1	1	0.06	pseudouridine synthase [Burkholderia sordidicola]
gi|42539	52	25562	1	1	1	1	0.18	pspA protein [Escherichia coli K-12]
gi|551003539	56	27695	1	1	1	1	0.12	PTS alpha-glucoside transporter subunit IIBC [Lachnobacterium bovis]
gi|551003539	29	27695	1	1	1	1	0.16	PTS alpha-glucoside transporter subunit IIBC [Lachnobacterium bovis]
gi|490968325	69	38042	1	1	1	1	0.12	PTS mannose transporter subunit IIAB [Anaerococcus lactolyticus]
gi|493639930	53	43632	1	1	1	1	0.08	PucR family transcriptional regulator [Kineosphaera limosa]
gi|504782696	37	110506	1	1	1	1	0.04	pullulanase [Exiguobacterium antarcticum]
gi|515720553	59	91715	1	1	1	1	0.04	purple acid phosphatase [Bacillus sp. FJAT-13831]
gi|685075485	95	36982	8	8	1	1	0.12	Putative acetyl-hydrolase LipR precursor [Jeotgalicoccus sp. 13MG44_air]
gi|685075485	68	36982	2	2	1	1	0.12	Putative acetyl-hydrolase LipR precursor [Jeotgalicoccus sp. 13MG44_air]
gi|491637720	68	33824	1	1	1	1	0.10	putative ATP-binding component of ABC transport system [Pseudoalteromonas luteoviolacea]
gi|514916362	39	37827	1	1	1	1	0.09	putative Dipeptide transport ATP-binding protein DppD [Streptomyces aurantiacus]
gi|365419170	62	51981	1	1	1	1	0.08	putative D-lactate dehydrogenase, mitochondrial precursor (Lactate dehydrogenase D) (DLD) [Bradyrhizobium sp. STM 3843]
gi|495477296	46	30867	1	1	1	1	0.11	putative endonuclease/exonuclease/phosphatase family protein [Algoriphagus machipongonensis]
gi|110589474	78	24886	2	2	1	1	0.13	putative fumarate reductase cytochrome subunit [Endoriftia persephone 'Hot96_1+Hot96_2']
gi|547293228	39	58649	1	1	1	1	0.06	putative gamma-D-glutamyl-L-diamino acid endopeptidase 1 [Clostridium sp. CAG:75]
gi|490093709	45	35074	1	1	1	1	0.09	putative iron-siderophore ABC transporter permease protein [Streptomyces viridochromogenes]
gi|505119239	47	44195	1	1	1	1	0.07	putative membrane-associated Zn-dependent protease [Mycobacterium smegmatis]
gi|18653271	62	75724	1	1	1	1	0.06	putative O-acetyltransferase WavN [Vibrio cholerae]
gi|387762394	65	29868	3	3	1	1	0.11	putative ribulose-1,5-bisphosphate carboxylase oxygenase form II, partial [Ferriphaselus amnicola]
gi|545476422	51	22777	1	1	1	1	0.15	putative RNA polymerase ECF-type sigma factor [Vibrio ezurae]
gi|153963000	57	19159	5	5	1	1	0.18	putative sulfide-quinone reductase [uncultured bacterium]
gi|153963000	63	19159	8	8	1	1	0.18	putative sulfide-quinone reductase [uncultured bacterium]
gi|153963000	44	19159	3	3	1	1	0.24	putative sulfide-quinone reductase [uncultured bacterium]
gi|546762600	46	129419	1	1	1	1	0.03	putative uncharacterized protein [Bacteroides sp. CAG:20]
gi|547308759	39	39412	1	1	1	1	0.08	putative uncharacterized protein [Bacteroides sp. CAG:702]
gi|547733975	59	73683	1	1	1	1	0.06	putative uncharacterized protein [Bacteroides sp. CAG:709]
gi|547279885	58	16144	2	2	1	1	0.21	putative uncharacterized protein [Clostridium sp. CAG:122]
gi|547279885	56	16144	1	1	1	1	0.21	putative uncharacterized protein [Clostridium sp. CAG:122]
gi|548131831	83	44836	5	5	1	1	0.07	putative uncharacterized protein [Dialister sp. CAG:357]
gi|548131831	62	44836	2	2	1	1	0.10	putative uncharacterized protein [Dialister sp. CAG:357]
gi|548131831	104	44836	11	11	1	1	0.10	putative uncharacterized protein [Dialister sp. CAG:357]
gi|548131831	59	44836	5	5	1	1	0.10	putative uncharacterized protein [Dialister sp. CAG:357]
gi|548131831	67	44836	2	2	1	1	0.10	putative uncharacterized protein [Dialister sp. CAG:357]
gi|547962914	56	37762	1	1	1	1	0.09	putative uncharacterized protein [Eggerthella sp. CAG:298]
gi|547898925	64	78893	1	1	1	1	0.05	putative uncharacterized protein [Firmicutes bacterium CAG:227]
gi|547780156	66	108690	1	1	1	1	0.03	putative uncharacterized protein [Firmicutes bacterium CAG:240]
gi|547735447	66	36964	1	1	1	1	0.12	putative uncharacterized protein [Prevotella sp. CAG:1320]
gi|547735447	155	36964	5	5	1	1	0.12	putative uncharacterized protein [Prevotella sp. CAG:1320]
gi|547735447	66	36964	1	1	1	1	0.09	putative uncharacterized protein [Prevotella sp. CAG:1320]
gi|547735447	34	36964	1	1	1	1	0.09	putative uncharacterized protein [Prevotella sp. CAG:1320]
gi|547735447	68	36964	1	1	1	1	0.12	putative uncharacterized protein [Prevotella sp. CAG:1320]
gi|547735447	84	36964	1	1	1	1	0.12	putative uncharacterized protein [Prevotella sp. CAG:1320]
gi|546397308	96	23699	15	15	1	1	0.14	putative uncharacterized protein [Prevotella sp. CAG:255]
gi|546397308	63	23699	4	4	1	1	0.19	putative uncharacterized protein [Prevotella sp. CAG:255]
gi|576103141	54	263269	1	1	1	1	0.02	Putative viral A-like repeat/charged repetitive motif protein [Borrelia miyamotoi FR64b]
gi|476159747	62	12178	1	1	1	1	0.40	putative yddA, partial [Escherichia coli 2865200]
gi|489365225	55	26522	1	1	1	1	0.13	putative Zn-dependent protease [Ralstonia solanacearum]
gi|489365225	58	26522	5	5	1	1	0.13	putative Zn-dependent protease [Ralstonia solanacearum]
gi|489365225	65	26522	1	1	1	1	0.17	putative Zn-dependent protease [Ralstonia solanacearum]
gi|655039941	54	46805	1	1	1	1	0.07	pyridine nucleotide-disulfide oxidoreductase [Thiothrix lacustris]
gi|512612865	86	44087	2	2	1	1	0.10	pyrophosphate-fructose 6-phosphate 1-phosphotransferase [Propionimicrobium lymphophilum]
gi|512612865	64	44087	1	1	1	1	0.07	pyrophosphate-fructose 6-phosphate 1-phosphotransferase [Propionimicrobium lymphophilum]
gi|512612865	63	44087	1	1	1	1	0.10	pyrophosphate-fructose 6-phosphate 1-phosphotransferase [Propionimicrobium lymphophilum]
gi|2564217	62	100449	1	1	1	1	0.04	pyruvate dehydrogenase (lipoamide) [Azotobacter vinelandii]
gi|639196685	70	41844	1	1	1	1	0.08	pyruvate dehydrogenase [Sporosarcina sp. EUR3 2.2.2]
gi|609242245	79	50853	1	1	1	1	0.09	Pyruvate kinase [Spirochaeta sp. L21-RPul-D2]
gi|501096931	16	11521	1	1	1	1	0.43	quinol monooxygenase [Serratia proteamaculans]
gi|489639777	77	51173	2	2	1	1	0.06	radical SAM protein [Desulfotomaculum nigrificans]
gi|491188847	61	5191	1	1	1	1	0.70	Ras family protein, partial [Microbacterium laevaniformans]
gi|116188	62	10612	1	1	1	1	0.32	RecName: Full=10 kDa chaperonin; AltName: Full=GroES protein; AltName: Full=Protein Cpn10 [Candidatus Legionella jeonii]
gi|125125	56	34236	1	1	1	1	0.10	RecName: Full=ATP-dependent 6-phosphofructokinase {ECO:0000255|HAMAP-Rule:MF_00339}; Short=ATP-PFK {ECO:0000255|HAMAP-Rule:MF_00339}; Short=Phosphofructokinase {ECO:0000255|HAMAP-Rule:MF_00339} {ECO:0000255|HAMAP-Rule:MF_00339}; AltName: Full=Phosph
gi|114890	50	141390	2	2	1	1	0.02	RecName: Full=Cellulose synthase operon protein C; Flags: Precursor [Komagataeibacter xylinus]
gi|114890	61	141390	6	6	1	1	0.02	RecName: Full=Cellulose synthase operon protein C; Flags: Precursor [Komagataeibacter xylinus]
gi|114890	48	141390	1	1	1	1	0.03	RecName: Full=Cellulose synthase operon protein C; Flags: Precursor [Komagataeibacter xylinus]
gi|114890	45	141390	1	1	1	1	0.02	RecName: Full=Cellulose synthase operon protein C; Flags: Precursor [Komagataeibacter xylinus]
gi|114890	44	141390	2	2	1	1	0.03	RecName: Full=Cellulose synthase operon protein C; Flags: Precursor [Komagataeibacter xylinus]
gi|7387629	53	79207	1	1	1	1	0.04	RecName: Full=Chaperone protein DnaK; AltName: Full=HSP70; AltName: Full=Heat shock 70 kDa protein; AltName: Full=Heat shock protein 70 [Aphanothece halophytica]
gi|47115718	108	70751	1	1	1	1	0.05	RecName: Full=Chaperone protein HtpG {ECO:0000255|HAMAP-Rule:MF_00505}; AltName: Full=Heat shock protein HtpG {ECO:0000255|HAMAP-Rule:MF_00505}; AltName: Full=High temperature protein G {ECO:0000255|HAMAP-Rule:MF_00505} [Chromobacterium violaceum AT
gi|6015080	115	43355	4	4	1	1	0.10	RecName: Full=Elongation factor Tu {ECO:0000255|HAMAP-Rule:MF_00118}; Short=EF-Tu {ECO:0000255|HAMAP-Rule:MF_00118} [Geobacillus stearothermophilus]
gi|2828519	1028	17952	20	20	2	2	0.59	RecName: Full=Ferric uptake regulation protein; Short=Ferric uptake regulator [Klebsiella pneumoniae]
gi|2828519	268	17952	5	5	1	1	0.26	RecName: Full=Ferric uptake regulation protein; Short=Ferric uptake regulator [Klebsiella pneumoniae]
gi|75466962	36	39145	1	1	1	1	0.08	RecName: Full=GDP-mannose 4,6-dehydratase {ECO:0000255|HAMAP-Rule:MF_00955} {ECO:0000255|HAMAP-Rule:MF_00955}; AltName: Full=GDP-D-mannose dehydratase {ECO:0000255|HAMAP-Rule:MF_00955} [Aggregatibacter actinomycetemcomitans]
gi|131904	128	53058	6	6	2	2	0.17	RecName: Full=Ribulose bisphosphate carboxylase large chain {ECO:0000255|HAMAP-Rule:MF_01338}; Short=RuBisCO large subunit {ECO:0000255|HAMAP-Rule:MF_01338} {ECO:0000255|HAMAP-Rule:MF_01338} [Alvinoconcha hessleri symbiotic bacterium]
gi|134951	116	18822	1	1	1	1	0.25	RecName: Full=Streptavidin; Flags: Precursor [Streptomyces avidinii]
gi|654429400	60	61593	2	2	1	1	0.05	recombination and repair protein [Pseudomonas syringae]
gi|654429400	58	61593	1	1	1	1	0.07	recombination and repair protein [Pseudomonas syringae]
gi|670455363	48	22179	1	1	1	1	0.21	recombination protein RecR [Thiomonas sp. FB-Cd]
gi|490204373	69	12315	1	1	1	1	0.28	RecQ [Thermosipho africanus]
gi|499664878	60	36733	2	2	1	1	0.09	replication protein B [Xanthomonas euvesicatoria]
gi|499664878	56	36733	1	1	1	1	0.12	replication protein B [Xanthomonas euvesicatoria]
gi|499664878	56	36733	1	1	1	1	0.09	replication protein B [Xanthomonas euvesicatoria]
gi|499664878	60	36733	1	1	1	1	0.12	replication protein B [Xanthomonas euvesicatoria]
gi|11071868	49	21550	1	1	1	1	0.21	resolvase [Pseudomonas sp.]
gi|488696972	56	23588	1	1	1	1	0.14	response regulator [Cystobacter fuscus]
gi|162072844	2187	42100	46	46	7	7	1.30	reverse-type dissimilatory siroheme sulfite reductase subunit A [Thiothrix nivea DSM 5205]
gi|385763698	48	47490	1	1	1	1	0.07	reverse-type dissimilatory sulfite reductase (rDSR), alpha subunit (DsrA) [uncultured bacterium ws172H5]
gi|494941697	70	54390	2	2	1	1	0.06	Rhamnulokinase [Cronobacter condimenti]
gi|494941697	103	54390	5	5	1	1	0.06	Rhamnulokinase [Cronobacter condimenti]
gi|494941697	60	54390	2	2	1	1	0.08	Rhamnulokinase [Cronobacter condimenti]
gi|494941697	117	54390	5	5	1	1	0.06	Rhamnulokinase [Cronobacter condimenti]
gi|494941697	65	54390	1	1	1	1	0.06	Rhamnulokinase [Cronobacter condimenti]
gi|494941697	86	54390	3	3	1	1	0.08	Rhamnulokinase [Cronobacter condimenti]
gi|426285264	68	14288	1	1	1	1	0.33	Rhamnulokinase [Cronobacter dublinensis 582]
gi|426285264	112	14288	3	3	1	1	0.33	Rhamnulokinase [Cronobacter dublinensis 582]
gi|426285264	76	14288	2	2	1	1	0.33	Rhamnulokinase [Cronobacter dublinensis 582]
gi|490658972	65	32661	1	1	1	1	0.10	ribokinase [Burkholderia pseudomallei]
gi|551177252	50	58928	1	1	1	1	0.07	ribonuclease [Fusobacterium russii]
gi|551177252	51	58928	1	1	1	1	0.07	ribonuclease [Fusobacterium russii]
gi|671597730	48	43163	1	1	1	1	0.08	ribonuclease D [Rheinheimera texasensis]
gi|551258634	49	23126	1	1	1	1	0.15	ribonuclease HII [Microbacterium sp. B19]
gi|663325842	57	51674	1	1	1	1	0.06	ribonuclease II [Streptomyces sp. NRRL B-3229]
gi|494055339	57	13382	1	1	1	1	0.36	ribonuclease P [Candidatus Pelagibacter ubique]
gi|499409172	57	90480	1	1	1	1	0.04	ribonucleotide-diphosphate reductase subunit alpha [Tropheryma whipplei]
gi|489388422	65	20590	2	2	2	2	0.50	ribosome recycling factor [Pseudomonas stutzeri]
gi|655040149	2016	52827	182	182	7	7	1.63	ribulose 1,5-bisphosphate carboxylase [Thiothrix lacustris]
gi|497535846	1167	52918	44	44	4	4	0.53	ribulose bisophosphate carboxylase [Mariprofundus ferrooxydans]
gi|488795343	456	53012	31	31	5	5	0.52	ribulose bisophosphate carboxylase [Thiothrix nivea]
gi|498322869	97	50526	2	2	1	1	0.07	ribulose bisphosphate carboxylase [Acidithiobacillus thiooxidans]
gi|113431896	157	26309	12	12	4	4	1.05	ribulose-1,5-bisphosphate carboxylase/oxygenase large subunit [bacteria endosymbiont of Lucinoma aff. kazani]
gi|150014862	427	25951	29	29	3	3	1.07	ribulose-1,5-bisphosphate carboxylase/oxygenase large subunit [uncultured bacterium]
gi|32307665	235	20729	21	21	2	2	0.57	ribulose-1,5-bisphosphate carboxylase/oxygenase large subunit [uncultured bacterium]
gi|60418554	156	24350	2	2	1	1	0.14	ribulose-1,5-bisphosphate carboxylase/oxygenase large subunit [uncultured marine bacterium]
gi|60418554	57	24350	1	1	1	1	0.19	ribulose-1,5-bisphosphate carboxylase/oxygenase large subunit [uncultured marine bacterium]
gi|499557390	163	24792	9	9	1	1	0.14	ribulose-phosphate 3-epimerase [Aromatoleum aromaticum]
gi|499557390	122	24792	9	9	1	1	0.18	ribulose-phosphate 3-epimerase [Aromatoleum aromaticum]
gi|499557390	135	24792	7	7	1	1	0.18	ribulose-phosphate 3-epimerase [Aromatoleum aromaticum]
gi|499557390	66	24792	1	1	1	1	0.14	ribulose-phosphate 3-epimerase [Aromatoleum aromaticum]
gi|499557390	66	24792	1	1	1	1	0.18	ribulose-phosphate 3-epimerase [Aromatoleum aromaticum]
gi|499557390	89	24792	3	3	1	1	0.18	ribulose-phosphate 3-epimerase [Aromatoleum aromaticum]
gi|490264010	908	24837	19	19	1	1	0.46	ribulose-phosphate 3-epimerase [Erwinia amylovora]
gi|490264010	216	24837	3	3	1	1	0.29	ribulose-phosphate 3-epimerase [Erwinia amylovora]
gi|518775929	86	24395	3	3	1	1	0.14	ribulose-phosphate 3-epimerase [Oceanimonas smirnovii]
gi|655038872	418	25312	26	26	3	3	0.64	ribulose-phosphate 3-epimerase [Thiothrix lacustris]
gi|655038872	227	25312	19	19	1	1	0.28	ribulose-phosphate 3-epimerase [Thiothrix lacustris]
gi|655038872	159	25312	7	7	1	1	0.18	ribulose-phosphate 3-epimerase [Thiothrix lacustris]
gi|488797036	286	8317	15	15	1	1	1.02	RNA chaperone Hfq [Thiothrix nivea]
gi|594556417	79	68260	4	4	1	1	0.05	RNA helicase [Comamonas aquatica DA1877]
gi|594556417	120	68260	5	5	1	1	0.05	RNA helicase [Comamonas aquatica DA1877]
gi|490528942	43	46886	1	1	1	1	0.07	RNA helicase [Vibrio metschnikovii]
gi|665522787	62	23801	1	1	1	1	0.14	RNA polymerase [Streptomyces sp. NRRL S-623]
gi|446369227	44	33125	1	1	1	1	0.10	RNA polymerase sigma factor SigJ [Bacillus thuringiensis]
gi|446369227	56	33125	1	1	1	1	0.10	RNA polymerase sigma factor SigJ [Bacillus thuringiensis]
gi|446369227	66	33125	3	3	1	1	0.14	RNA polymerase sigma factor SigJ [Bacillus thuringiensis]
gi|446369227	54	33125	1	1	1	1	0.14	RNA polymerase sigma factor SigJ [Bacillus thuringiensis]
gi|496230363	46	32562	1	1	1	1	0.14	RNA polymerase sigma factor SigJ [Oceanibaculum indicum]
gi|504630288	62	33321	2	2	2	2	0.21	RNA polymerase sigma24 factor [Mycobacterium chubuense]
gi|651248624	95	74180	1	1	1	1	0.06	RNase II stability modulator [Achromobacter xylosoxidans]
gi|645519098	61	112241	2	2	1	1	0.03	RND transporter [Ensifer adhaerens]
gi|645519098	52	112241	1	1	1	1	0.03	RND transporter [Ensifer adhaerens]
gi|645519098	62	112241	2	2	1	1	0.04	RND transporter [Ensifer adhaerens]
gi|736787217	70	112241	3	3	1	1	0.04	RND transporter [Ensifer adhaerens]
gi|645519098	58	112241	2	2	1	1	0.03	RND transporter [Ensifer adhaerens]
gi|494000080	56	111840	1	1	1	1	0.04	RND transporter [Megasphaera micronuciformis]
gi|494000080	56	111840	1	1	1	1	0.04	RND transporter [Megasphaera micronuciformis]
gi|493421593	44	14626	1	1	1	1	0.33	roadblock/LC7 domain protein [Streptomyces turgidiscabies]
gi|492536111	48	33301	1	1	1	1	0.10	rod shape-determining protein MreC [Oxalobacter formigenes]
gi|648293069	57	30730	1	1	1	1	0.15	RpiR family transcriptional regulator [Brevibacillus massiliensis]
gi|655040579	58	15145	2	2	1	1	0.23	rubrerythrin [Thiothrix lacustris]
gi|488796098	93	15207	1	1	1	1	0.22	rubrerythrin [Thiothrix nivea]
gi|269468540	55	51110	1	1	1	1	0.09	S-adenosylhomocysteine hydrolase [uncultured SUP05 cluster bacterium]
gi|159880508	41	57754	2	2	1	1	0.06	S-adenosyl-L-homocysteine hydrolase [Hydrogenivirga sp. 128-5-R1-1]
gi|518475256	149	47579	3	3	3	3	0.22	S-adenosyl-L-homocysteine hydrolase [Novispirillum itersonii]
gi|488796609	742	41963	46	46	5	5	0.98	S-adenosylmethionine synthetase [Thiothrix nivea]
gi|568601806	62	32161	1	1	1	1	0.10	S-adenosylmethionine tRNA ribosyltransferase [Dickeya dianthicola]
gi|494922306	61	45209	1	1	1	1	0.07	SAM-dependent methlyltransferase [Shewanella sp. HN-41]
gi|556613631	54	35463	1	1	1	1	0.09	SAM-dependent methyltransferase [Mycobacterium kansasii]
gi|702880963	94	99086	2	2	1	1	0.04	SARP family transcriptional regulator [Amycolatopsis jejuensis]
gi|496244799	51	45705	1	1	1	1	0.07	secretion protein HlyD [Halomonas sp. HAL1]
gi|500101282	21	79828	1	1	1	1	0.05	sensory box protein [Arthrobacter aurescens]
gi|494868044	48	46910	2	2	1	1	0.07	serine protease [Lachnoanaerobaculum sp. OBRC5-5]
gi|494868044	72	46910	2	2	1	1	0.07	serine protease [Lachnoanaerobaculum sp. OBRC5-5]
gi|494868044	69	46910	6	6	1	1	0.09	serine protease [Lachnoanaerobaculum sp. OBRC5-5]
gi|494868044	44	46910	1	1	1	1	0.09	serine protease [Lachnoanaerobaculum sp. OBRC5-5]
gi|494868044	56	46910	1	1	1	1	0.07	serine protease [Lachnoanaerobaculum sp. OBRC5-5]
gi|494868044	44	46910	1	1	1	1	0.09	serine protease [Lachnoanaerobaculum sp. OBRC5-5]
gi|497487973	59	63219	1	1	1	1	0.05	serine recombinase [Oceanicaulis sp. HTCC2633]
gi|408496814	71	61770	1	1	1	1	0.07	serine/threonine protein kinase related protein [Rhodopirellula baltica SH28]
gi|564613411	61	30243	1	1	1	1	0.11	shikimate dehydrogenase [Candidatus Pelagibacter ubique]
gi|664262877	65	27205	1	1	1	1	0.12	short-chain dehydrogenase [Streptomyces sp. NRRL S-920]
gi|496162622	54	26813	1	1	1	1	0.12	short-chain dehydrogenase/reductase SDR [Citreicella sp. SE45]
gi|406912857	55	30858	1	1	1	1	0.11	short-chain dehydrogenase/reductase SDR [uncultured bacterium]
gi|504849557	57	68308	1	1	1	1	0.06	Siderophore synthetase component, ligase [Streptomyces venezuelae]
gi|490568455	66	21351	1	1	1	1	0.22	signal peptidase [Bacillus methanolicus]
gi|497309586	141	61820	5	5	1	1	0.05	signal protein [Desulfosporosinus sp. OT]
gi|497309586	369	61820	15	15	1	1	0.05	signal protein [Desulfosporosinus sp. OT]
gi|497309586	64	61820	2	2	1	1	0.07	signal protein [Desulfosporosinus sp. OT]
gi|497309586	76	61820	1	1	1	1	0.07	signal protein [Desulfosporosinus sp. OT]
gi|497309586	122	61820	2	2	1	1	0.07	signal protein [Desulfosporosinus sp. OT]
gi|497309586	104	61820	4	4	1	1	0.05	signal protein [Desulfosporosinus sp. OT]
gi|497309586	54	61820	1	1	1	1	0.05	signal protein [Desulfosporosinus sp. OT]
gi|497309586	82	61820	1	1	1	1	0.07	signal protein [Desulfosporosinus sp. OT]
gi|497309586	69	61820	1	1	1	1	0.07	signal protein [Desulfosporosinus sp. OT]
gi|497309586	115	61820	4	4	1	1	0.07	signal protein [Desulfosporosinus sp. OT]
gi|573552972	61	68554	1	1	1	1	0.05	S-layer protein [Paenibacillus sp. FSL H8-237]
gi|571029553	58	66188	1	1	1	1	0.07	small-conductance mechanosensitive channel [Thermosynechococcus sp. NK55a]
gi|493410516	40	62258	1	1	1	1	0.05	sodium:phosphate symporter [Chlorobium ferrooxidans]
gi|492440676	77	49404	1	1	1	1	0.07	sodium:proton antiporter [Prevotella dentalis]
gi|495823278	136	65236	3	3	1	1	0.10	sodium:proton antiporter [Pseudovibrio sp. JE062]
gi|495823278	63	65236	1	1	1	1	0.07	sodium:proton antiporter [Pseudovibrio sp. JE062]
gi|495375712	67	46675	1	1	1	1	0.09	sodium:proton antiporter [Verrucomicrobiae bacterium DG1235]
gi|494387531	72	63982	1	1	1	1	0.05	sodium:solute symporter [Loktanella vestfoldensis]
gi|655040917	140	10860	5	5	2	2	0.74	SoxZ [Thiothrix lacustris]
gi|496471476	57	103355	1	1	1	1	0.03	spermidine synthase [Desulfovibrio sp. FW1012B]
gi|488796570	164	32090	12	12	1	1	0.48	spermidine synthase [Thiothrix nivea]
gi|652712557	51	117465	1	1	1	1	0.03	spermidine/putrescine ABC transporter permease [Mesoplasma syrphidae]
gi|547592311	41	109575	2	2	1	1	0.04	spore coat protein CotH [Clostridium sp. CAG:524]
gi|546601357	62	95410	1	1	1	1	0.03	Spore germination protein XA [Paenibacillus sp. P22]
gi|733411584	58	71037	1	1	1	1	0.06	squalene-hopene cyclase [Sinomonas sp. MUSC 117]
gi|491085109	145	20298	5	5	1	1	0.17	stress protein [Streptomyces mobaraensis]
gi|91201838	59	70166	1	1	1	1	0.05	strongly similar to cd1 nitrite reductase NirS [Candidatus Kuenenia stuttgartiensis]
gi|640397296	40	49569	2	2	2	2	0.18	succinate-semialdehyde dehydrogenase [Luteimonas huabeiensis]
gi|495316928	58	41137	1	1	1	1	0.11	sugar ABC transporter ATPase [Reinekea blandensis]
gi|551220298	34	35527	1	1	1	1	0.09	sugar ABC transporter substrate-binding protein [Chloroflexi bacterium oral taxon 439]
gi|577779347	61	26615	1	1	1	1	0.17	sugar transferase [Listeria weihenstephanensis FSL R9-0317]
gi|493897495	51	60773	2	2	1	1	0.05	sulfatase [Dysgonomonas mossii]
gi|493897495	47	60773	1	1	1	1	0.07	sulfatase [Dysgonomonas mossii]
gi|493897495	42	60773	1	1	1	1	0.05	sulfatase [Dysgonomonas mossii]
gi|70888492	46	47513	1	1	1	1	0.07	sulfide:quinone oxidoreductase [Acidithiobacillus ferrooxidans]
gi|517686232	77	41751	2	2	1	1	0.08	sulfite oxidase [Rhizobium sp. 42MFCr.1]
gi|517686232	83	41751	1	1	1	1	0.11	sulfite oxidase [Rhizobium sp. 42MFCr.1]
gi|521065095	689	49270	14	14	6	6	0.47	sulfite reductase [Thiothrix disciformis]
gi|655041650	53	40537	1	1	1	1	0.08	sulfite reductase [Thiothrix lacustris]
gi|488797739	2076	49311	48	48	7	7	1.18	sulfite reductase [Thiothrix nivea]
gi|488797740	251	40524	18	18	3	3	0.27	sulfite reductase [Thiothrix nivea]
gi|488797740	125	40524	6	6	2	2	0.17	sulfite reductase [Thiothrix nivea]
gi|488797739	45	49311	1	1	1	1	0.07	sulfite reductase [Thiothrix nivea]
gi|488796597	30	11296	1	1	1	1	0.30	sulfite reductase subunit gamma [Thiothrix nivea]
gi|646372658	90	35969	5	5	2	2	0.30	sulfolactate dehydrogenase [Bordetella trematum]
gi|655041653	83	10581	5	5	1	1	0.33	sulfur relay protein TusB [Thiothrix lacustris]
gi|488797741	189	14343	3	3	3	3	0.90	sulfurtransferase [Thiothrix nivea]
gi|501783276	55	21322	1	1	1	1	0.16	superoxide dismutase [Thioalkalivibrio sulfidiphilus]
gi|655041086	23359	21300	372	372	2	2	1.08	superoxide dismutase [Thiothrix lacustris]
gi|488795946	19586	21365	383	383	1	1	0.34	superoxide dismutase [Thiothrix nivea]
gi|488795946	26	21365	1	1	1	1	0.22	superoxide dismutase [Thiothrix nivea]
gi|549780695	72	199899	1	1	1	1	0.02	surfactin synthesis [Bacillus amyloliquefaciens]
gi|494414039	55	41007	1	1	1	1	0.08	SusC/RagA family TonB-linked outer membrane protein [Bacteroides cellulosilyticus]
gi|651599989	55	99950	2	2	1	1	0.03	tail protein [Dickeya dianthicola]
gi|651599989	50	99950	1	1	1	1	0.04	tail protein [Dickeya dianthicola]
gi|568600486	48	99818	2	2	1	1	0.04	tail protein [Dickeya dianthicola]
gi|506328597	53	45814	1	1	1	1	0.07	tail protein [Dickeya zeae]
gi|545148648	55	85849	1	1	1	1	0.04	tail protein [Serratia marcescens]
gi|493502097	57	23935	1	1	1	1	0.19	TenA family transcriptional regulator [Synechococcus sp. PCC 7335]
gi|493502097	62	23935	3	3	1	1	0.14	TenA family transcriptional regulator [Synechococcus sp. PCC 7335]
gi|493502097	61	23935	3	3	1	1	0.19	TenA family transcriptional regulator [Synechococcus sp. PCC 7335]
gi|493502097	57	23935	1	1	1	1	0.19	TenA family transcriptional regulator [Synechococcus sp. PCC 7335]
gi|499511266	42	68435	1	1	1	1	0.06	terminase [Bacillus licheniformis]
gi|491947322	60	23144	1	1	1	1	0.14	TetR family transcriptional regulator [Lactobacillus rhamnosus]
gi|738412164	64	20812	1	1	1	1	0.22	TetR family transcriptional regulator [Mycobacterium asiaticum]
gi|490471843	41	26062	1	1	1	1	0.13	TetR family transcriptional regulator [Thauera linaloolentis]
gi|145712	76	30158	1	1	1	1	0.11	tetrahydrodipicolinate N-succinyltransferase (dapD) [Escherichia coli]
gi|655472478	53	11304	1	1	1	1	0.30	thioredoxin [Psychrilyobacter atlanticus]
gi|488684141	57	73624	1	1	1	1	0.04	thioredoxin [Stigmatella aurantiaca]
gi|488797425	189	13805	4	4	1	1	0.25	thioredoxin [Thiothrix nivea]
gi|488797425	190	13805	4	4	1	1	0.25	thioredoxin [Thiothrix nivea]
gi|692312405	31	35123	1	1	1	1	0.09	TonB system transport protein ExbB [Moritella viscosa]
gi|495535189	106	90063	3	3	3	3	0.15	TonB-denpendent receptor [Brevundimonas sp. BAL3]
gi|495536359	33	99615	1	1	1	1	0.04	TonB-denpendent receptor [Brevundimonas sp. BAL3]
gi|497971080	58	87509	2	2	1	1	0.04	TonB-dependent heme receptor, partial [Pectobacterium carotovorum]
gi|497971080	56	87509	1	1	1	1	0.05	TonB-dependent heme receptor, partial [Pectobacterium carotovorum]
gi|33469294	58	90332	1	1	1	1	0.04	topoisomerase IV subunit A [Staphylococcus haemolyticus]
gi|33469294	62	90332	1	1	1	1	0.05	topoisomerase IV subunit A [Staphylococcus haemolyticus]
gi|566142891	65	212962	1	1	1	1	0.02	toxin [Pseudomonas moraviensis]
gi|496383312	76	56782	1	1	1	1	0.08	transcription antiterminator BglG [Pantoea sp. Sc1]
gi|489810686	57	17923	1	1	1	1	0.26	transcription elongation factor GreA [Lactobacillus oris]
gi|653146164	49	42073	1	1	1	1	0.11	transcriptional regulator [Aquimarina latercula]
gi|736703457	58	26531	1	1	1	1	0.17	transcriptional regulator [Chryseobacterium soli]
gi|506227096	59	13815	1	1	1	1	0.35	transcriptional regulator [Nakamurella multipartita]
gi|635655704	58	33566	1	1	1	1	0.10	transcriptional regulator [Pseudogulbenkiania sp. MAI-1]
gi|695868152	166	40141	16	16	1	1	0.08	transcriptional regulator [Streptomyces albus]
gi|695868152	236	40141	22	22	1	1	0.08	transcriptional regulator [Streptomyces albus]
gi|695868152	205	40141	19	19	1	1	0.11	transcriptional regulator [Streptomyces albus]
gi|695868152	62	40141	1	1	1	1	0.11	transcriptional regulator [Streptomyces albus]
gi|695868152	70	40141	2	2	1	1	0.08	transcriptional regulator [Streptomyces albus]
gi|695868152	63	40141	1	1	1	1	0.08	transcriptional regulator [Streptomyces albus]
gi|695868152	62	40141	1	1	1	1	0.11	transcriptional regulator [Streptomyces albus]
gi|695868152	66	40141	1	1	1	1	0.11	transcriptional regulator [Streptomyces albus]
gi|655041457	153	26874	6	6	1	1	0.12	transcriptional regulator [Thiothrix lacustris]
gi|490868106	55	36623	1	1	1	1	0.09	transcriptional regulator [Vibrio splendidus]
gi|547711345	44	153087	3	3	1	1	0.03	transcriptional regulator AraC family [Bacteroides sp. CAG:530]
gi|547711345	40	153087	1	1	1	1	0.02	transcriptional regulator AraC family [Bacteroides sp. CAG:530]
gi|547711345	40	153087	1	1	1	1	0.03	transcriptional regulator AraC family [Bacteroides sp. CAG:530]
gi|497187779	39	22369	2	2	1	1	0.15	Transcriptional regulator, AcrR family protein [Moraxella macacae]
gi|497187779	56	22369	2	2	1	1	0.20	Transcriptional regulator, AcrR family protein [Moraxella macacae]
gi|497187779	88	22369	5	5	1	1	0.20	Transcriptional regulator, AcrR family protein [Moraxella macacae]
gi|497187779	54	22369	3	3	1	1	0.15	Transcriptional regulator, AcrR family protein [Moraxella macacae]
gi|497187779	53	22369	2	2	1	1	0.20	Transcriptional regulator, AcrR family protein [Moraxella macacae]
gi|497187779	62	22369	3	3	1	1	0.20	Transcriptional regulator, AcrR family protein [Moraxella macacae]
gi|497187779	48	22369	1	1	1	1	0.20	Transcriptional regulator, AcrR family protein [Moraxella macacae]
gi|489077152	54	13003	1	1	1	1	0.37	transcriptional regulator, ArsR family [Leptospira vanthielii]
gi|126717507	56	29673	1	1	1	1	0.15	transcriptional regulator, GntR family protein [Roseobacter sp. SK209-2-6]
gi|639136557	21	128706	1	1	1	1	0.03	transcription-repair coupling factor [Cellulophaga baltica]
gi|500208436	31	42095	1	1	1	1	0.11	trans-homoaconitate synthase [Desulfotomaculum reducens]
gi|655039522	186	71373	6	6	2	2	0.09	transketolase [Thiothrix lacustris]
gi|489131801	53	78608	1	1	1	1	0.04	transketolase, central region [Sphingopyxis sp. MC1]
gi|487459962	87	39065	6	6	2	2	0.24	translation elongation factor EF-1, subunit alpha, partial [Escherichia coli]
gi|487459962	169	39065	4	4	3	3	0.28	translation elongation factor EF-1, subunit alpha, partial [Escherichia coli]
gi|487459962	83	39065	2	2	2	2	0.24	translation elongation factor EF-1, subunit alpha, partial [Escherichia coli]
gi|495818350	46	104670	1	1	1	1	0.03	translation initiation factor IF-2 [Sutterella parvirubra]
gi|489621877	44	113283	1	1	1	1	0.03	transporter [Sinorhizobium meliloti]
gi|489621877	62	113283	2	2	1	1	0.04	transporter [Sinorhizobium meliloti]
gi|489621877	56	113283	1	1	1	1	0.04	transporter [Sinorhizobium meliloti]
gi|499550607	75	55930	2	2	1	1	0.08	transposase [Geobacillus kaustophilus]
gi|489327820	77	27115	2	2	1	1	0.12	transposase [Pseudomonas fluorescens]
gi|495967796	61	47094	1	1	1	1	0.09	transposase, IS116/IS110/IS902 family [Rhodopirellula maiorica]
gi|488620468	111	52858	4	4	1	1	0.08	trigger factor [Borrelia burgdorferi]
gi|488620468	82	52858	1	1	1	1	0.08	trigger factor [Borrelia burgdorferi]
gi|488620468	66	52858	1	1	1	1	0.08	trigger factor [Borrelia burgdorferi]
gi|646359891	126	56654	2	2	1	1	0.06	trigger factor [Sphingomonas sp. JGI 0001002-A17]
gi|488795592	124	26070	2	2	1	1	0.27	triosephosphate isomerase [Thiothrix nivea]
gi|499382457	20	38321	5	5	1	1	0.09	tRNA pseudouridine synthase B [Wigglesworthia glossinidia]
gi|499382457	17	38321	1	1	1	1	0.09	tRNA pseudouridine synthase B [Wigglesworthia glossinidia]
gi|445968765	65	70182	1	1	1	1	0.05	tRNA uridine 5-carboxymethylaminomethyl modification protein [Staphylococcus aureus]
gi|445968765	59	70182	1	1	1	1	0.06	tRNA uridine 5-carboxymethylaminomethyl modification protein [Staphylococcus aureus]
gi|445968765	61	70182	1	1	1	1	0.06	tRNA uridine 5-carboxymethylaminomethyl modification protein [Staphylococcus aureus]
gi|648658219	59	35200	1	1	1	1	0.09	tRNA(Ile)-lysidine synthetase [Bordetella sp. FB-8]
gi|648658219	56	35200	1	1	1	1	0.09	tRNA(Ile)-lysidine synthetase [Bordetella sp. FB-8]
gi|648658219	56	35200	1	1	1	1	0.13	tRNA(Ile)-lysidine synthetase [Bordetella sp. FB-8]
gi|499151170	62	35687	1	1	1	1	0.12	tRNA-dihydrouridine synthase C [Plesiomonas shigelloides]
gi|489020642	383	49336	10	10	1	1	0.07	tryptophan synthase subunit beta [Thauera sp. 28]
gi|652529945	64	49864	3	3	1	1	0.09	tryptophanase [Glycomyces arizonensis]
gi|501259280	49	37357	1	1	1	1	0.12	tryptophanyl-tRNA synthase [Candidatus Desulforudis audaxviator]
gi|620039660	56	27426	1	1	1	1	0.12	TsnR protein [Mycobacterium triplex]
gi|575858138	45	22448	1	1	1	1	0.20	Two component transcriptional regulator, winged helix family [Burkholderia caribensis MBA4]
gi|497264360	50	29568	1	1	1	1	0.11	Two-component system response regulator [Fulvivirga imtechensis]
gi|497267074	54	51842	2	2	1	1	0.06	two-component system sensor histidine kinase [Fulvivirga imtechensis]
gi|489837214	58	27940	1	1	1	1	0.16	type IV secretion system protein virB8 [Neisseria mucosa]
gi|489837214	62	27940	1	1	1	1	0.16	type IV secretion system protein virB8 [Neisseria mucosa]
gi|291431648	49	24769	1	1	1	1	0.14	type-F conjugative transfer system protein TraW [Escherichia coli B185]
gi|291431648	47	24769	1	1	1	1	0.18	type-F conjugative transfer system protein TraW [Escherichia coli B185]
gi|495143163	67	58954	1	1	1	1	0.07	ubiquinone biosynthesis protein UbiB [Polaromonas sp. CF318]
gi|495143163	62	58954	1	1	1	1	0.06	ubiquinone biosynthesis protein UbiB [Polaromonas sp. CF318]
gi|495143163	80	58954	1	1	1	1	0.07	ubiquinone biosynthesis protein UbiB [Polaromonas sp. CF318]
gi|656037503	61	30857	1	1	1	1	0.11	UDP-glucose 4-epimerase [Kaistia adipata]
gi|642957005	57	56336	1	1	1	1	0.08	UDP-N-acetylmuramoyl-L-alanyl-D-glutamate--2,6-diaminopimelate ligase [Streptomyces iranensis]
gi|2338738	48	30316	1	1	1	1	0.15	unknown [Rhodobacter capsulatus]
gi|1196832	54	38017	1	1	1	1	0.09	unknown protein [Sinorhizobium meliloti]
gi|471236	40	142556	1	1	1	1	0.02	unnamed protein product [Haemophilus influenzae]
gi|490740750	40	28926	1	1	1	1	0.11	uridine phosphorylase [[Eubacterium] cellulosolvens]
gi|503505372	60	136411	1	1	1	1	0.03	UvrD/REP helicase [Sphaerochaeta coccoides]
gi|495835539	78	86798	6	6	1	1	0.04	xanthine dehydrogenase [Ruegeria sp. R11]
gi|489343997	46	22498	1	1	1	1	0.15	XRE family transcriptional regulator [Pseudomonas putida]
gi|499943217	51	47480	1	1	1	1	0.07	XRE family transcriptional regulator [Shewanella sp. MR-4]
gi|503499120	87	28360	1	1	1	1	0.16	XRE family transcriptional regulator [Verrucosispora maris]
gi|490366566	50	36646	1	1	1	1	0.09	xylose isomerase [Proteus mirabilis]
gi|523636522	57	26243	1	1	1	1	0.13	YfiH family protein [Leptospira alstoni]
gi|2529467	60	54541	4	4	1	1	0.06	YokS [Bacillus subtilis subsp. subtilis str. 168]
gi|2529467	78	54541	7	7	1	1	0.06	YokS [Bacillus subtilis subsp. subtilis str. 168]
gi|2529467	57	54541	1	1	1	1	0.08	YokS [Bacillus subtilis subsp. subtilis str. 168]
gi|2529467	57	54541	1	1	1	1	0.08	YokS [Bacillus subtilis subsp. subtilis str. 168]
gi|518640033	60	24412	1	1	1	1	0.19	Zn-dependent hydrolase [Saccharomonospora halophila]
gi|518640033	56	24412	1	1	1	1	0.19	Zn-dependent hydrolase [Saccharomonospora halophila]

## Sheet: Kerogen IV.1
Accession	Score	Mass	Matches	Pep(sig)	Sequences	↓Seq(sig)	emPAI	Description
gi|505009124	58	88866	2	2	1	1	0.04	(NiFe) hydrogenase maturation protein HypF [Calothrix parietina]
gi|498210424	61	29184	1	1	1	1	0.11	16S ribosomal RNA methyltransferase RsmE [Nesterenkonia sp. F]
gi|446081568	79	36038	4	4	1	1	0.09	16S rRNA methyltransferase [Streptococcus oralis]
gi|446081568	72	36038	4	4	1	1	0.09	16S rRNA methyltransferase [Streptococcus oralis]
gi|547857946	70	24665	1	1	1	1	0.14	1-acyl-sn-glycerol-3-phosphate acyltransferase [Clostridium sp. CAG:352]
gi|547857946	88	24665	2	2	1	1	0.14	1-acyl-sn-glycerol-3-phosphate acyltransferase [Clostridium sp. CAG:352]
gi|499354454	69	73783	2	2	1	1	0.04	2,4-dienoyl-CoA reductase [Colwellia psychrerythraea]
gi|499354454	71	73783	2	2	1	1	0.04	2,4-dienoyl-CoA reductase [Colwellia psychrerythraea]
gi|664099829	63	59102	3	3	1	1	0.06	2-aminobenzoate-CoA ligase [Streptomyces rimosus]
gi|544647509	58	46594	1	1	1	1	0.07	2-haloacid dehalogenase [Bradyrhizobium sp. DFCI-1]
gi|544647509	64	46594	2	2	1	1	0.07	2-haloacid dehalogenase [Bradyrhizobium sp. DFCI-1]
gi|544647509	81	46594	3	3	1	1	0.07	2-haloacid dehalogenase [Bradyrhizobium sp. DFCI-1]
gi|500263322	129	30819	4	4	4	4	0.51	2-hydroxy-3-oxopropionate reductase [Pseudomonas stutzeri]
gi|489393387	67	30808	2	2	2	2	0.23	2-hydroxy-3-oxopropionate reductase [Pseudomonas stutzeri]
gi|500263322	226	30819	5	5	3	3	0.36	2-hydroxy-3-oxopropionate reductase [Pseudomonas stutzeri]
gi|496259901	67	51981	1	1	1	1	0.06	2-hydroxy-acid oxidase [Bradyrhizobium sp. STM 3843]
gi|495201528	54	64362	1	1	1	1	0.05	2-isopropylmalate synthase [Janibacter hoylei]
gi|490244293	59	35904	1	1	1	1	0.09	2-nitropropane dioxygenase [Cardiobacterium hominis]
gi|490244293	60	35904	2	2	1	1	0.09	2-nitropropane dioxygenase [Cardiobacterium hominis]
gi|490244293	57	35904	1	1	1	1	0.09	2-nitropropane dioxygenase [Cardiobacterium hominis]
gi|496990711	74	32362	1	1	1	1	0.10	2-nitropropane dioxygenase [Oribacterium sp. oral taxon 108]
gi|490758414	54	32363	1	1	1	1	0.10	2-nitropropane dioxygenase-like enzyme [Caulobacter vibrioides]
gi|494155304	78	27154	2	2	1	1	0.12	30S ribosomal protein S12 [Kordia algicida]
gi|652838692	49	27255	1	1	1	1	0.12	30S ribosomal protein S5 [Mycoplasma testudinis]
gi|492842799	51	11669	1	1	1	1	0.30	30S ribosomal protein S6 [Desulfovibrio fructosivorans]
gi|491055053	57	27260	1	1	1	1	0.12	3'-5' exonuclease [Riemerella anatipestifer]
gi|491055053	56	27260	1	1	1	1	0.12	3'-5' exonuclease [Riemerella anatipestifer]
gi|663132432	55	30693	1	1	1	1	0.11	3-alpha,7-alpha,12-alpha-trihydroxy-5-beta-cholest-24-enoyl-CoA hydratase [Microbispora sp. NRRL B-24597]
gi|406924138	56	12323	1	1	1	1	0.28	3-deoxy-8-phosphooctulonate synthase, partial [uncultured bacterium]
gi|496579076	59	49514	2	2	1	1	0.07	3-deoxy-D-manno-octulosonic acid transferase [Fibrisoma limi]
gi|489258035	157	30459	12	12	1	1	0.23	3-hydroxyacyl-CoA dehydrogenase [Brevundimonas diminuta]
gi|489258035	128	30459	8	8	1	1	0.23	3-hydroxyacyl-CoA dehydrogenase [Brevundimonas diminuta]
gi|489258035	170	30459	15	15	1	1	0.23	3-hydroxyacyl-CoA dehydrogenase [Brevundimonas diminuta]
gi|504425725	41	84935	1	1	1	1	0.04	3-hydroxyacyl-CoA dehydrogenase [Staphylococcus pseudintermedius]
gi|260097674	73	83784	1	1	1	1	0.04	3-hydroxybutyryl-CoA dehydrogenase [Brucella abortus NCTC 8038]
gi|1314267	40	39268	1	1	1	1	0.08	3-isopropylmalate dehydrogenase [Pseudomonas aeruginosa PAO1]
gi|653049188	54	40340	2	2	1	1	0.17	3-isopropylmalate dehydrogenase [Rhodospirillales bacterium URHD0088]
gi|499353517	67	43677	1	1	1	1	0.08	3-methyl-2-oxobutanoate dehydrogenase [Colwellia psychrerythraea]
gi|654897944	59	28828	2	2	1	1	0.12	3-oxoacyl-ACP reductase [Bradyrhizobium elkanii]
gi|654897944	59	28828	3	3	1	1	0.12	3-oxoacyl-ACP reductase [Bradyrhizobium elkanii]
gi|503990492	70	27064	1	1	1	1	0.12	3-oxoacyl-ACP reductase [Tannerella forsythia]
gi|446755451	55	43377	1	1	1	1	0.08	3-oxoacyl-ACP synthase [Acinetobacter baumannii]
gi|489378712	63	43379	1	1	1	1	0.08	3-oxoacyl-ACP synthase [Pseudomonas stutzeri]
gi|489378712	151	43379	2	2	1	1	0.08	3-oxoacyl-ACP synthase [Pseudomonas stutzeri]
gi|292828018	64	80706	1	1	1	1	0.04	3-phosphoshikimate 1-carboxyvinyltransferase [Acinetobacter sp. SH024]
gi|292828018	65	80706	1	1	1	1	0.04	3-phosphoshikimate 1-carboxyvinyltransferase [Acinetobacter sp. SH024]
gi|498129511	81	34009	2	2	1	1	0.10	3'-RNA processing protein [Pseudomonas fuscovaginae]
gi|501315394	56	46064	1	1	1	1	0.07	4-aminobutyrate aminotransferase [Leptothrix cholodnii]
gi|502036167	47	103733	1	1	1	1	0.03	4Fe-4S ferredoxin [Azotobacter vinelandii]
gi|516070219	61	47591	1	1	1	1	0.07	4-hydroxybutyrate CoA-transferase [alpha proteobacterium LLX12A]
gi|489922868	57	30797	1	1	1	1	0.11	5,10-methylenetetrahydrofolate reductase [Bifidobacterium angulatum]
gi|489922868	59	30797	1	1	1	1	0.11	5,10-methylenetetrahydrofolate reductase [Bifidobacterium angulatum]
gi|490123045	58	21911	2	2	1	1	0.15	50S ribosomal protein L17 [Gordonia terrae]
gi|490123045	55	21911	1	1	1	1	0.15	50S ribosomal protein L17 [Gordonia terrae]
gi|55274223	46	12415	1	1	1	1	0.28	50S ribosomal protein L5 [Sitophilus granarius P-endosymbiont]
gi|499428554	84	42355	3	3	1	1	0.16	50S rRNA methyltransferase [Helicobacter hepaticus]
gi|654774225	59	33768	1	1	1	1	0.10	5'-nucleotidase [Burkholderia ferrariae]
gi|499630135	85	68582	1	1	1	1	0.05	5'-nucleotidase [Thiobacillus denitrificans]
gi|499630135	100	68582	2	2	1	1	0.05	5'-nucleotidase [Thiobacillus denitrificans]
gi|493570344	64	153733	2	2	1	1	0.02	5-oxoprolinase (ATP-hydrolyzing) [Desulfotomaculum gibsoniae]
gi|563945172	70	73506	1	1	1	1	0.04	5-oxoprolinase [Mesorhizobium sp. L2C084A000]
gi|563945172	65	73506	2	2	1	1	0.04	5-oxoprolinase [Mesorhizobium sp. L2C084A000]
gi|490787482	143	16403	6	6	3	3	1.12	6,7-dimethyl-8-ribityllumazine synthase [Acinetobacter bohemicus]
gi|490787482	265	16403	13	13	2	2	1.12	6,7-dimethyl-8-ribityllumazine synthase [Acinetobacter bohemicus]
gi|490787482	75	16403	2	2	1	1	0.45	6,7-dimethyl-8-ribityllumazine synthase [Acinetobacter bohemicus]
gi|664460034	57	15703	1	1	1	1	0.22	6-phosphofructokinase [Streptomyces sp. NRRL S-1813]
gi|503574561	56	38049	1	1	1	1	0.09	ABC transporter [Amycolicicoccus subflavus]
gi|488773820	72	40143	3	3	2	2	0.17	ABC transporter [Beggiatoa alba]
gi|550978977	61	40077	1	1	1	1	0.08	ABC transporter [Fodinicurvata sediminis]
gi|550978977	83	40077	3	3	2	2	0.17	ABC transporter [Fodinicurvata sediminis]
gi|550978977	97	40077	4	4	2	2	0.17	ABC transporter [Fodinicurvata sediminis]
gi|675844844	68	60463	2	2	1	1	0.05	ABC transporter [Geobacillus stearothermophilus]
gi|494720800	69	97164	1	1	1	1	0.03	ABC transporter [Micromonospora lupini]
gi|494720800	88	97164	2	2	1	1	0.03	ABC transporter [Micromonospora lupini]
gi|493209078	73	67265	1	1	1	1	0.05	ABC transporter [Nodularia spumigena]
gi|493209078	90	67265	2	2	1	1	0.05	ABC transporter [Nodularia spumigena]
gi|655057784	62	36695	1	1	1	1	0.09	ABC transporter [Ruminococcus sp. FC2018]
gi|664228523	56	26706	1	1	1	1	0.12	ABC transporter [Streptomyces griseus]
gi|654979336	57	59442	1	1	1	1	0.06	ABC transporter [Streptomyces sp. TAA040]
gi|518159278	44	37017	2	2	1	1	0.09	ABC transporter [Streptomyces sp. TOR3209]
gi|518159278	42	37017	1	1	1	1	0.09	ABC transporter [Streptomyces sp. TOR3209]
gi|493218774	101	68899	2	2	1	1	0.05	ABC transporter ATP-binding protein [Mesorhizobium amorphae]
gi|493218774	102	68899	2	2	1	1	0.05	ABC transporter ATP-binding protein [Mesorhizobium amorphae]
gi|493218774	81	68899	1	1	1	1	0.05	ABC transporter ATP-binding protein [Mesorhizobium amorphae]
gi|653063726	78	38993	1	1	1	1	0.08	ABC transporter ATP-binding protein [Microvirga flocculans]
gi|653063726	83	38993	2	2	1	1	0.08	ABC transporter ATP-binding protein [Microvirga flocculans]
gi|653063726	101	38993	2	2	1	1	0.08	ABC transporter ATP-binding protein [Microvirga flocculans]
gi|494534554	57	73495	1	1	1	1	0.04	ABC transporter ATP-binding protein [Rhodopirellula baltica]
gi|497421523	104	88192	7	7	1	1	0.04	ABC transporter permease [Bradyrhizobiaceae bacterium SG-6C]
gi|497421523	89	88192	5	5	1	1	0.04	ABC transporter permease [Bradyrhizobiaceae bacterium SG-6C]
gi|497421523	66	88192	3	3	1	1	0.04	ABC transporter permease [Bradyrhizobiaceae bacterium SG-6C]
gi|518416049	58	36472	1	1	1	1	0.09	ABC transporter permease [Deinococcus apachensis]
gi|550980946	100	43066	1	1	1	1	0.08	ABC transporter permease [Fodinicurvata sediminis]
gi|550980946	126	43066	2	2	1	1	0.08	ABC transporter permease [Fodinicurvata sediminis]
gi|550980946	198	43066	3	3	1	1	0.08	ABC transporter permease [Fodinicurvata sediminis]
gi|497449463	86	43166	1	1	1	1	0.08	ABC transporter permease [Microvirga lotononidis]
gi|504667249	315	42805	9	9	5	5	0.56	ABC transporter permease [Pseudomonas stutzeri]
gi|504667249	218	42805	4	4	2	2	0.16	ABC transporter permease [Pseudomonas stutzeri]
gi|494763977	69	32662	1	1	1	1	0.10	ABC transporter permease [Streptomyces zinciresistens]
gi|494763977	64	32662	1	1	1	1	0.10	ABC transporter permease [Streptomyces zinciresistens]
gi|591276716	57	32145	1	1	1	1	0.10	ABC transporter permease protein [Bacillus sp. TS-2]
gi|504008535	123	65147	3	3	2	2	0.10	ABC transporter substrate-binding protein [Azospirillum brasilense]
gi|504008535	98	65147	3	3	2	2	0.10	ABC transporter substrate-binding protein [Azospirillum brasilense]
gi|504016594	41	53355	1	1	1	1	0.06	ABC transporter substrate-binding protein [Burkholderia sp. YI23]
gi|496463372	55	30014	1	1	1	1	0.11	ABC transporter substrate-binding protein [Clostridium sp. DL-VIII]
gi|496463372	57	30014	1	1	1	1	0.11	ABC transporter substrate-binding protein [Clostridium sp. DL-VIII]
gi|506384009	153	65693	7	7	4	4	0.22	ABC transporter substrate-binding protein [Desulfobacterium autotrophicum]
gi|491842582	82	56680	1	1	1	1	0.06	ABC transporter substrate-binding protein [Mycobacterium hassiacum]
gi|490030794	65	54024	1	1	1	1	0.06	ABC transporter substrate-binding protein [Mycobacterium vaccae]
gi|495874061	71	57909	1	1	1	1	0.06	ABC transporter substrate-binding protein [Nitratireductor pacificus]
gi|494605188	83	62290	1	1	1	1	0.05	ABC transporter substrate-binding protein [Opitutaceae bacterium TAV1]
gi|494605188	72	62290	1	1	1	1	0.05	ABC transporter substrate-binding protein [Opitutaceae bacterium TAV1]
gi|494605188	137	62290	3	3	1	1	0.05	ABC transporter substrate-binding protein [Opitutaceae bacterium TAV1]
gi|496516382	51	50856	1	1	1	1	0.06	ABC transporter substrate-binding protein [Paenibacillus sp. oral taxon 786]
gi|489269236	61	40288	1	1	1	1	0.08	ABC transporter substrate-binding protein [Pseudomonas fluorescens]
gi|491647986	62	75939	1	1	1	1	0.04	ABC transporter substrate-binding protein [Rothia mucilaginosa]
gi|496023818	64	35333	2	2	1	1	0.09	ABC transporter substrate-binding protein [Streptomyces sp. SPB74]
gi|496023818	66	35333	3	3	1	1	0.09	ABC transporter substrate-binding protein [Streptomyces sp. SPB74]
gi|494720088	65	60997	1	1	1	1	0.05	ABC transporter substrate-binding protein [Streptomyces sp. W007]
gi|490379808	36	43850	1	1	1	1	0.08	ABC transporter substrate-binding protein [Thauera sp. 63]
gi|490379808	58	43850	1	1	1	1	0.08	ABC transporter substrate-binding protein [Thauera sp. 63]
gi|501797202	81	56263	4	4	2	2	0.12	ABC transporter substrate-binding protein [Thermomicrobium roseum]
gi|404271467	67	38223	2	2	1	1	0.09	ABC transporter substrate-binding protein, partial [Bradyrhizobium sp. CCGE-LA001]
gi|404264677	81	56474	2	2	2	2	0.12	ABC transporter substrate-binding protein, partial [Bradyrhizobium sp. CCGE-LA001]
gi|404271467	59	38223	2	2	1	1	0.09	ABC transporter substrate-binding protein, partial [Bradyrhizobium sp. CCGE-LA001]
gi|496150926	55	60870	1	1	1	1	0.05	ABC transporter, binding protein [Mesorhizobium metallidurans]
gi|544742251	73	66734	1	1	1	1	0.05	ABC-type multidrug transport system, ATPase and permease component [Sporomusa ovata]
gi|144900231	105	36848	3	3	1	1	0.09	ABC-type phosphate transport system [Magnetospirillum gryphiswaldense MSR-1]
gi|490830325	139	43982	4	4	2	2	0.16	acetate kinase [Acinetobacter johnsonii]
gi|669188683	53	57786	1	1	1	1	0.06	acetate permease [Campylobacter sp. 1485E]
gi|669188683	58	57786	2	2	1	1	0.06	acetate permease [Campylobacter sp. 1485E]
gi|669188683	67	57786	3	3	1	1	0.06	acetate permease [Campylobacter sp. 1485E]
gi|496119747	61	49057	2	2	1	1		acetoacetate metabolism regulatory protein AtoC [Glaciecola lipolytica]
gi|497630560	74	29227	1	1	1	1	0.11	acetoin dehydrogenase [Saccharopolyspora erythraea]
gi|495389187	47	18095	1	1	1	1	0.19	acetolactate synthase [Herbaspirillum sp. YR522]
gi|253727031	58	65209	1	1	1	1	0.05	acetolactate synthase, large subunit, biosynthetic type [Staphylococcus aureus subsp. aureus TCH130]
gi|575456519	54	64059	1	1	1	1	0.05	Acetyl-CoA dehydrogenase-like C-terminal domain protein [Gemmatimonadetes bacterium KBS708]
gi|575456519	38	64059	1	1	1	1	0.05	Acetyl-CoA dehydrogenase-like C-terminal domain protein [Gemmatimonadetes bacterium KBS708]
gi|489383918	80	54402	2	2	1	1	0.06	acetyl-CoA hydrolase [Pseudomonas stutzeri]
gi|500263017	211	53599	6	6	4	4	0.27	acetyl-CoA hydrolase [Pseudomonas stutzeri]
gi|504631879	159	54482	6	6	2	2	0.12	acetyl-CoA hydrolase [Pseudomonas stutzeri]
gi|489383918	128	54402	5	5	2	2	0.12	acetyl-CoA hydrolase [Pseudomonas stutzeri]
gi|489373559	77	54638	1	1	1	1	0.06	acetyl-CoA hydrolase [Pseudomonas stutzeri]
gi|672389244	44	74145	1	1	1	1	0.04	Acetyl-CoA synthetase (ADP-forming) [Sphingobium herbicidovorans NBRC 16415]
gi|491656225	76	32328	2	2	1	1	0.10	acetylglutamate kinase [Rhodococcus hoagii]
gi|591276484	61	38740	1	1	1	1	0.09	acetylglutamate semialdehyde dehydrogenase [Bacillus sp. TS-2]
gi|591276484	56	38740	1	1	1	1	0.09	acetylglutamate semialdehyde dehydrogenase [Bacillus sp. TS-2]
gi|655359401	45	18653	1	1	1	1	0.18	acetyltransferase [Shewanella fidelis]
gi|571051767	63	22027	3	3	1	1	0.15	acetyltransferase, GNAT family [uncultured bacterium Contig1586]
gi|47088554	46	14635	1	1	1	1	0.23	aconitase B [Pseudomonas syringae pv. actinidiae]
gi|503063692	63	69619	1	1	1	1	0.05	aconitate hydratase [Thermoanaerobacterium thermosaccharolyticum]
gi|503063692	70	69619	1	1	1	1	0.05	aconitate hydratase [Thermoanaerobacterium thermosaccharolyticum]
gi|503063692	90	69619	3	3	1	1	0.05	aconitate hydratase [Thermoanaerobacterium thermosaccharolyticum]
gi|491200952	64	41836	3	3	2	2	0.16	acyl-CoA dehydrogenase [Mycobacterium abscessus]
gi|491200952	70	41836	2	2	2	2	0.16	acyl-CoA dehydrogenase [Mycobacterium abscessus]
gi|21717403	177	68463	4	4	2	2	0.10	acyl-CoA dehydrogenase A [Acinetobacter sp. M-1]
gi|501277187	64	38671	3	3	1	1	0.09	acyl-CoA dehydrogenase domain-containing protein [Methylobacterium radiotolerans]
gi|501277187	59	38671	1	1	1	1	0.09	acyl-CoA dehydrogenase domain-containing protein [Methylobacterium radiotolerans]
gi|501277187	61	38671	2	2	1	1	0.09	acyl-CoA dehydrogenase domain-containing protein [Methylobacterium radiotolerans]
gi|407007964	167	58699	4	4	2	2	0.12	Acyl-CoA dehydrogenase, partial [uncultured bacterium]
gi|297180173	59	64930	1	1	1	1	0.05	acyl-CoA dehydrogenases [uncultured bacterium HF130_12L15]
gi|570744237	42	42620	1	1	1	1	0.08	acyltransferase [Niabella soli DSM 19437]
gi|655027108	51	27121	1	1	1	1	0.12	acyltransferase [Nocardia sp. CNY236]
gi|490719044	57	42254	1	1	1	1	0.08	AFG1 family ATPase [Marinobacter nanhaiticus]
gi|490719044	59	42254	2	2	1	1	0.08	AFG1 family ATPase [Marinobacter nanhaiticus]
gi|501451673	56	39946	1	1	1	1	0.08	agmatine deiminase [Chlorobium phaeobacteroides]
gi|654779798	59	39441	1	1	1	1	0.08	alanine racemase [Pseudochrobactrum sp. AO18b]
gi|446065336	69	41527	1	1	1	1	0.08	alcohol dehydrogenase [Acinetobacter baumannii]
gi|446065336	56	41527	1	1	1	1	0.08	alcohol dehydrogenase [Acinetobacter baumannii]
gi|491126456	148	42626	3	3	3	3	0.25	alcohol dehydrogenase [Acinetobacter johnsonii]
gi|499688088	67	42526	3	3	1	1	0.08	alcohol dehydrogenase [Desulfovibrio alaskensis]
gi|654498023	58	36666	1	1	1	1	0.09	alcohol dehydrogenase [Halomonas halocynthiae]
gi|517727322	65	40566	2	2	1	1	0.08	alcohol dehydrogenase [Rhizobium sp. 2MFCol3.1]
gi|481050357	58	38201	4	4	1	1	0.09	Alcohol dehydrogenase [Salmonella enterica subsp. houtenae serovar 16:z4,z32:-- str. RKS3027]
gi|481050357	57	38201	3	3	1	1	0.09	Alcohol dehydrogenase [Salmonella enterica subsp. houtenae serovar 16:z4,z32:-- str. RKS3027]
gi|481050357	54	38201	1	1	1	1	0.09	Alcohol dehydrogenase [Salmonella enterica subsp. houtenae serovar 16:z4,z32:-- str. RKS3027]
gi|663398328	82	39395	11	11	1	1	0.08	alcohol dehydrogenase [Streptomyces purpeofuscus]
gi|663398328	78	39395	12	12	1	1	0.08	alcohol dehydrogenase [Streptomyces purpeofuscus]
gi|663398328	81	39395	10	10	1	1	0.08	alcohol dehydrogenase [Streptomyces purpeofuscus]
gi|663143141	37	33669	1	1	1	1	0.10	alcohol dehydrogenase [Streptomyces sp. NRRL S-813]
gi|490789497	156	55422	5	5	4	4	0.26	aldehyde dehydrogenase [Acinetobacter bohemicus]
gi|491126465	112	55644	5	5	5	5	0.33	aldehyde dehydrogenase [Acinetobacter johnsonii]
gi|491126465	352	55644	12	12	7	7	0.58	aldehyde dehydrogenase [Acinetobacter johnsonii]
gi|491126465	177	55644	3	3	2	2	0.12	aldehyde dehydrogenase [Acinetobacter johnsonii]
gi|491118422	119	55484	4	4	3	3	0.19	aldehyde dehydrogenase [Acinetobacter towneri]
gi|491118422	92	55484	3	3	3	3	0.19	aldehyde dehydrogenase [Acinetobacter towneri]
gi|491118422	82	55484	1	1	1	1	0.06	aldehyde dehydrogenase [Acinetobacter towneri]
gi|493682336	59	38354	1	1	1	1	0.09	aldehyde dehydrogenase [Microcoleus vaginatus]
gi|500262322	89	55066	2	2	2	2	0.12	aldehyde dehydrogenase [Pseudomonas stutzeri]
gi|489377479	83	19198	1	1	1	1	0.18	aldehyde dehydrogenase, partial [Pseudomonas stutzeri]
gi|489377479	84	19198	1	1	1	1	0.18	aldehyde dehydrogenase, partial [Pseudomonas stutzeri]
gi|504629506	59	35381	1	1	1	1	0.09	aldo/keto reductase [Mycobacterium chubuense]
gi|491083632	123	35505	8	8	1	1	0.09	Aldo-keto reductase [Streptomyces mobaraensis]
gi|491083632	137	35505	8	8	1	1	0.09	Aldo-keto reductase [Streptomyces mobaraensis]
gi|491083632	123	35505	6	6	1	1	0.09	Aldo-keto reductase [Streptomyces mobaraensis]
gi|502034505	62	58778	1	1	1	1	0.06	alkaline phosphatase [Azotobacter vinelandii]
gi|404272368	100	39806	2	2	1	1	0.08	alkaline phosphatase [Bradyrhizobium sp. CCGE-LA001]
gi|657604188	74	53075	1	1	1	1	0.06	alkaline phosphatase [Brevundimonas bacteroides]
gi|657604188	91	53075	2	2	1	1	0.06	alkaline phosphatase [Brevundimonas bacteroides]
gi|653282729	104	48286	2	2	1	1	0.07	alkaline phosphatase [Curvibacter gracilis]
gi|653282729	99	48286	2	2	1	1	0.07	alkaline phosphatase [Curvibacter gracilis]
gi|653282729	151	48286	3	3	1	1	0.07	alkaline phosphatase [Curvibacter gracilis]
gi|493321337	96	68459	2	2	1	1	0.05	alkaline phosphatase [Cylindrospermopsis raciborskii]
gi|493321337	80	68459	2	2	1	1	0.05	alkaline phosphatase [Cylindrospermopsis raciborskii]
gi|493321337	101	68459	2	2	1	1	0.05	alkaline phosphatase [Cylindrospermopsis raciborskii]
gi|499608221	192	56710	12	12	5	5	0.48	alkaline phosphatase [Dechloromonas aromatica]
gi|499608221	178	56710	14	14	5	5	0.40	alkaline phosphatase [Dechloromonas aromatica]
gi|499608221	189	56710	12	12	4	4	0.33	alkaline phosphatase [Dechloromonas aromatica]
gi|496314488	75	58253	4	4	2	2	0.12	alkaline phosphatase [gamma proteobacterium NOR5-3]
gi|496314488	80	58253	3	3	2	2	0.12	alkaline phosphatase [gamma proteobacterium NOR5-3]
gi|496314488	79	58253	4	4	2	2	0.12	alkaline phosphatase [gamma proteobacterium NOR5-3]
gi|503643409	58	70285	1	1	1	1	0.05	alkaline phosphatase [Geobacillus thermoglucosidasius]
gi|494164024	127	56253	8	8	2	2	0.12	alkaline phosphatase [Glaciecola polaris]
gi|494164024	122	56253	6	6	2	2	0.19	alkaline phosphatase [Glaciecola polaris]
gi|494164024	105	56253	4	4	2	2	0.19	alkaline phosphatase [Glaciecola polaris]
gi|495449313	75	60492	2	2	2	2	0.11	alkaline phosphatase [Marinobacter manganoxydans]
gi|495449313	66	60492	2	2	2	2	0.11	alkaline phosphatase [Marinobacter manganoxydans]
gi|521973362	143	59995	6	6	2	2	0.17	alkaline phosphatase [Methylomonas sp. MK1]
gi|521971693	89	54333	6	6	1	1	0.13	alkaline phosphatase [Methylomonas sp. MK1]
gi|521973362	109	59995	5	5	3	3	0.24	alkaline phosphatase [Methylomonas sp. MK1]
gi|521973362	117	59995	4	4	3	3	0.17	alkaline phosphatase [Methylomonas sp. MK1]
gi|658419662	73	58265	1	1	1	1	0.06	alkaline phosphatase [Methylosarcina lacus]
gi|658419662	81	58265	2	2	2	2	0.12	alkaline phosphatase [Methylosarcina lacus]
gi|658419662	82	58265	2	2	2	2	0.12	alkaline phosphatase [Methylosarcina lacus]
gi|502390611	95	54739	4	4	2	2	0.12	alkaline phosphatase [Methylotenera mobilis]
gi|502390611	172	54739	6	6	2	2	0.12	alkaline phosphatase [Methylotenera mobilis]
gi|502390611	160	54739	8	8	3	3	0.19	alkaline phosphatase [Methylotenera mobilis]
gi|495872652	95	58520	3	3	2	2	0.12	alkaline phosphatase [Nitratireductor pacificus]
gi|495872652	89	58520	2	2	2	2	0.12	alkaline phosphatase [Nitratireductor pacificus]
gi|550945738	40	54579	1	1	1	1	0.06	alkaline phosphatase [Ponticaulis koreensis]
gi|674723462	98	53881	5	5	2	2	0.19	alkaline phosphatase [Serratia sp. Ag2]
gi|496498899	220	56324	5	5	2	2	0.19	alkaline phosphatase [Sulfuricella denitrificans]
gi|496498899	103	56324	2	2	1	1	0.06	alkaline phosphatase [Sulfuricella denitrificans]
gi|496498899	134	56324	3	3	2	2	0.12	alkaline phosphatase [Sulfuricella denitrificans]
gi|508729516	113	57936	3	3	2	2	0.12	Alkaline phosphatase family protein [Oleispira antarctica RB-8]
gi|495154682	59	18882	1	1	1	1	0.18	alkylhydroperoxidase [Ochrobactrum sp. CDB2]
gi|489146512	61	20751	2	2	1	1	0.16	alpha/beta hydrolase fold protein [Comamonas testosteroni]
gi|489146512	64	20751	3	3	1	1	0.16	alpha/beta hydrolase fold protein [Comamonas testosteroni]
gi|489146512	74	20751	3	3	1	1	0.16	alpha/beta hydrolase fold protein [Comamonas testosteroni]
gi|505142593	58	29597	1	1	1	1	0.11	alpha/beta hydrolase fold protein [Fibrella aestuarina]
gi|490507867	59	67288	1	1	1	1	0.05	alpha-1,3-galactosidase A [Prevotella oris]
gi|491201367	60	135400	1	1	1	1	0.02	alpha-ketoglutarate decarboxylase [Mycobacterium abscessus]
gi|657921759	85	53784	1	1	1	1	0.06	amidase [Sphingomonas elodea]
gi|495844712	184	27972	11	11	6	6	1.20	amino acid ABC transporter [Pseudomonas sp. Chol1]
gi|489380184	238	27958	5	5	3	3	0.40	amino acid ABC transporter [Pseudomonas stutzeri]
gi|489380184	103	27958	2	2	1	1	0.12	amino acid ABC transporter [Pseudomonas stutzeri]
gi|649577371	76	42212	3	3	2	2	0.16	amino acid ABC transporter substrate-binding protein [bacterium JKG1]
gi|654873034	59	35737	2	2	2	2	0.19	amino acid ABC transporter substrate-binding protein [Desulfatirhabdium butyrativorans]
gi|498081509	130	36429	3	3	2	2	0.19	amino acid ABC transporter substrate-binding protein [Paracoccus sp. TRP]
gi|498081509	132	36429	4	4	2	2	0.19	amino acid ABC transporter substrate-binding protein [Paracoccus sp. TRP]
gi|557816908	350	37011	11	11	5	5	0.67	amino acid ABC transporter substrate-binding protein [Pseudomonas chloritidismutans]
gi|557816908	231	37011	9	9	5	5	0.67	amino acid ABC transporter substrate-binding protein [Pseudomonas chloritidismutans]
gi|489270593	72	36752	2	2	2	2	0.19	amino acid ABC transporter substrate-binding protein [Pseudomonas fluorescens]
gi|489339230	104	36887	3	3	3	3	0.29	amino acid ABC transporter substrate-binding protein [Pseudomonas mendocina]
gi|490559154	195	36977	6	6	3	3	0.29	amino acid ABC transporter substrate-binding protein [Pseudomonas pseudoalcaligenes]
gi|636789438	59	45881	1	1	1	1	0.07	amino acid ABC transporter substrate-binding protein [Sinorhizobium medicae]
gi|661437035	88	35782	2	2	2	2	0.19	amino acid ABC transporter substrate-binding protein [Thioclava dalianensis]
gi|652979763	78	37051	2	2	2	2	0.19	amino acid ABC transporter substrate-bindnig protein [Phyllobacterium sp. UNC302MFCol5.2]
gi|493558992	123	102893	5	5	1	1	0.03	amino acid adenylation enzyme/thioester reductase family protein [Xenococcus sp. PCC 7305]
gi|493558992	149	102893	6	6	1	1	0.03	amino acid adenylation enzyme/thioester reductase family protein [Xenococcus sp. PCC 7305]
gi|493558992	144	102893	6	6	1	1	0.03	amino acid adenylation enzyme/thioester reductase family protein [Xenococcus sp. PCC 7305]
gi|665546847	64	119879	2	2	1	1	0.03	amino acid adenylation protein [Streptomyces xanthophaeus]
gi|544858562	64	54085	2	2	1	1	0.06	amino acid carrier protein [Bacteriovorax sp. Seq25_V]
gi|564146779	61	49163	1	1	1	1	0.07	amino acid decarboxylase [Mycobacterium avium 10-5581]
gi|663201847	56	52084	1	1	1	1	0.06	amino acid decarboxylase, partial [Streptomyces sp. NRRL S-350]
gi|640709429	63	54430	1	1	1	1	0.06	amino acid permease [Leucobacter sp. PH1c]
gi|8809791	59	28843	1	1	1	1	0.12	aminoglycoside adenylyltransferase [Escherichia coli]
gi|568788371	56	106492	3	3	1	1	0.03	Aminomethyltransferase [Gammaproteobacteria bacterium MOLA455]
gi|568788371	51	106492	2	2	1	1	0.03	Aminomethyltransferase [Gammaproteobacteria bacterium MOLA455]
gi|568788371	65	106492	4	4	1	1	0.03	Aminomethyltransferase [Gammaproteobacteria bacterium MOLA455]
gi|490830759	79	52064	3	3	2	2	0.13	aminopeptidase A [Acinetobacter johnsonii]
gi|490830759	265	52064	7	7	3	3	0.20	aminopeptidase A [Acinetobacter johnsonii]
gi|635183394	57	49633	1	1	1	1	0.07	aminotransferase [Bacillus safensis FO-36b]
gi|635183394	53	49633	1	1	1	1	0.07	aminotransferase [Bacillus safensis FO-36b]
gi|584110164	80	278197	2	2	1	1	0.01	aminotransferase class-III family protein [Burkholderia thailandensis E444]
gi|584110164	81	278197	2	2	1	1	0.01	aminotransferase class-III family protein [Burkholderia thailandensis E444]
gi|584110164	62	278197	3	3	1	1	0.01	aminotransferase class-III family protein [Burkholderia thailandensis E444]
gi|489170611	39	248488	1	1	1	1	0.01	AMP-binding enzyme [Streptococcus macacae]
gi|495127922	57	62786	1	1	1	1	0.05	AMP-binding protein [Acidovorax sp. CF316]
gi|545397076	61	55338	1	1	1	1	0.06	anthranilate synthase component I [Clostridium sp. KLE 1755]
gi|488393485	85	41645	3	3	1	1	0.08	antibiotic ABC transporter permease [Staphylococcus simiae]
gi|491067510	52	34951	1	1	1	1	0.09	anti-sigma E factor [Serratia marcescens]
gi|491067510	50	34951	1	1	1	1	0.09	anti-sigma E factor [Serratia marcescens]
gi|518686401	54	39078	2	2	1	1	0.08	AraC family transcriptional regulator [Caulobacter sp. JGI 0001010-J14]
gi|506291171	67	38328	1	1	1	1	0.09	AraC family transcriptional regulator [Dyadobacter fermentans]
gi|506291171	68	38328	3	3	1	1	0.09	AraC family transcriptional regulator [Dyadobacter fermentans]
gi|493494959	76	33143	2	2	1	1	0.10	AraC family transcriptional regulator [Xanthomonas gardneri]
gi|499861960	55	27307	1	1	1	1	0.12	arginine ABC transporter ATP-binding protein [Sphingopyxis alaskensis]
gi|499861960	60	27307	2	2	1	1	0.12	arginine ABC transporter ATP-binding protein [Sphingopyxis alaskensis]
gi|498391242	77	66556	2	2	1	1	0.05	arginyl-tRNA synthetase [Bartonella vinsonii]
gi|498391242	79	66556	2	2	1	1	0.05	arginyl-tRNA synthetase [Bartonella vinsonii]
gi|498391242	76	66556	2	2	1	1	0.05	arginyl-tRNA synthetase [Bartonella vinsonii]
gi|488713510	64	63028	1	1	1	1	0.05	arginyl-tRNA synthetase [Myxococcus sp. (contaminant ex DSM 436)]
gi|488713510	63	63028	1	1	1	1	0.05	arginyl-tRNA synthetase [Myxococcus sp. (contaminant ex DSM 436)]
gi|500152418	36	48093	1	1	1	1	0.07	aromatic hydrocarbon degradation protein [Methylibium petroleiphilum]
gi|636486690	62	12124	2	2	1	1	0.28	arsenical resistance operon repressor [Geomicrobium sp. JCM 19055]
gi|636486690	66	12124	2	2	1	1	0.28	arsenical resistance operon repressor [Geomicrobium sp. JCM 19055]
gi|502979118	71	125038	1	1	1	1	0.03	ArsR family transcriptional regulator [Hyphomicrobium denitrificans]
gi|658527416	95	15011	2	2	1	1	0.23	ArsR family transcriptional regulator, partial [Saccharopolyspora rectivirgula]
gi|506275782	47	67485	2	2	1	1	0.05	asparagine synthase [Catenulispora acidiphila]
gi|491542065	1063	43933	26	26	8	8	1.06	aspartate aminotransferase [Acinetobacter johnsonii]
gi|491542065	573	43933	17	17	8	8	1.06	aspartate aminotransferase [Acinetobacter johnsonii]
gi|517507039	154	44379	5	5	4	4	0.33	aspartate aminotransferase [Acinetobacter tjernbergiae]
gi|516744221	70	42520	2	2	2	2	0.16	aspartate aminotransferase [Thiobacillus denitrificans]
gi|270315252	61	9697	2	2	1	1	0.36	aspartate--ammonia ligase [Haemophilus influenzae HK1212]
gi|270315252	66	9697	2	2	1	1	0.36	aspartate--ammonia ligase [Haemophilus influenzae HK1212]
gi|270315252	58	9697	1	1	1	1	0.36	aspartate--ammonia ligase [Haemophilus influenzae HK1212]
gi|490787734	401	41206	12	12	3	3	0.36	aspartate-semialdehyde dehydrogenase [Acinetobacter bohemicus]
gi|491054936	677	40777	32	32	11	11	3.08	aspartate-semialdehyde dehydrogenase [Acinetobacter junii]
gi|490793879	257	40777	9	9	4	4	0.48	aspartate-semialdehyde dehydrogenase [Acinetobacter sp. NIPH 809]
gi|489305227	46	40792	1	1	1	1	0.08	aspartate-semialdehyde dehydrogenase [Pseudomonas fluorescens]
gi|489305227	176	40792	6	6	3	3	0.37	aspartate-semialdehyde dehydrogenase [Pseudomonas fluorescens]
gi|489378595	93	40492	5	5	3	3	0.37	aspartate-semialdehyde dehydrogenase [Pseudomonas stutzeri]
gi|330899158	81	40088	1	1	1	1	0.08	aspartate-semialdehyde dehydrogenase [Pseudomonas syringae pv. japonica str. M301072]
gi|497973918	71	67901	1	1	1	1	0.05	aspartyl-tRNA synthase [Kurthia massiliensis]
gi|670622562	43	27764	1	1	1	1	0.12	ATP binding protein [Hyalangium minutum]
gi|670622562	56	27764	3	3	1	1	0.12	ATP binding protein [Hyalangium minutum]
gi|672307406	62	44894	1	1	1	1	0.07	ATPase [Microvirga sp. BSC39]
gi|496676597	59	40785	1	1	1	1	0.08	ATPase [Tannerella sp. 6_1_58FAA_CT1]
gi|495769703	62	67650	2	2	1	1	0.05	ATPase AAA [Acidocella sp. MX-AZ02]
gi|495769703	65	67650	2	2	1	1	0.05	ATPase AAA [Acidocella sp. MX-AZ02]
gi|493471547	61	79621	2	2	1	1	0.04	ATPase AAA [Dorea longicatena]
gi|501996220	68	77854	1	1	1	1	0.04	ATPase AAA [Rhodococcus opacus]
gi|664474607	88	93946	2	2	1	1	0.03	ATPase AAA [Streptomyces sp. NRRL F-5630]
gi|664474607	98	93946	2	2	1	1	0.03	ATPase AAA [Streptomyces sp. NRRL F-5630]
gi|664474607	90	93946	3	3	1	1	0.03	ATPase AAA [Streptomyces sp. NRRL F-5630]
gi|226371	71	50214	1	1	1	1	0.07	ATPase beta
gi|226371	52	50214	2	2	1	1	0.07	ATPase beta
gi|490318693	48	47496	2	2	1	1	0.07	ATPase FliI/YscN family protein [Sphingobium yanoikuyae]
gi|490318693	56	47496	1	1	1	1	0.07	ATPase FliI/YscN family protein [Sphingobium yanoikuyae]
gi|497401616	52	17464	1	1	1	1	0.19	ATP-binding protein [Streptomyces himastatinicus]
gi|497401616	60	17464	1	1	1	1	0.19	ATP-binding protein [Streptomyces himastatinicus]
gi|495982078	69	97551	1	1	1	1	0.03	ATP-dependent Clp protease ATP-binding protein [Ruminococcus sp. 5_1_39BFAA]
gi|497709856	64	91494	2	2	1	1	0.04	ATP-dependent Clp protease ATP-binding protein [Sporolactobacillus inulinus]
gi|497709856	73	91494	2	2	1	1	0.04	ATP-dependent Clp protease ATP-binding protein [Sporolactobacillus inulinus]
gi|497709856	57	91494	1	1	1	1	0.04	ATP-dependent Clp protease ATP-binding protein [Sporolactobacillus inulinus]
gi|498318082	74	90653	3	3	1	1	0.04	ATP-dependent Clp protease ATP-binding protein [Sporolactobacillus vineae]
gi|498318082	63	90653	1	1	1	1	0.04	ATP-dependent Clp protease ATP-binding protein [Sporolactobacillus vineae]
gi|500040714	66	82973	1	1	1	1	0.04	ATP-dependent DNA helicase [Clostridium novyi]
gi|503497762	62	83467	1	1	1	1	0.04	ATP-dependent DNA helicase [Verrucosispora maris]
gi|488705119	56	88176	1	1	1	1	0.04	ATP-dependent DNA helicase UvrD/PcrA [Cystobacter fuscus]
gi|653062426	68	149829	3	3	1	1	0.02	ATP-dependent helicase HrpA [Balneatrix alpica]
gi|108946644	78	78984	2	2	1	1	0.04	AvrBs2 [Xanthomonas oryzae pv. oryzicola]
gi|108946644	65	78984	1	1	1	1	0.04	AvrBs2 [Xanthomonas oryzae pv. oryzicola]
gi|464808221	42	41426	1	1	1	1	0.08	bacterial extracellular solute-binding family protein [Gordonia sp. NB4-1Y]
gi|464803859	152	45432	2	2	1	1	0.07	bacterial extracellular solute-binding s, 5 Middle family protein [Gordonia sp. NB4-1Y]
gi|464803859	110	45432	2	2	1	1	0.07	bacterial extracellular solute-binding s, 5 Middle family protein [Gordonia sp. NB4-1Y]
gi|464803859	135	45432	2	2	1	1	0.07	bacterial extracellular solute-binding s, 5 Middle family protein [Gordonia sp. NB4-1Y]
gi|61699159	68	43888	3	3	1	1	0.08	BchP [Thiocapsa roseopersicina]
gi|61699159	70	43888	3	3	1	1	0.08	BchP [Thiocapsa roseopersicina]
gi|61699159	59	43888	1	1	1	1	0.08	BchP [Thiocapsa roseopersicina]
gi|654344076	64	36072	3	3	1	1	0.09	beta-hexosaminidase [Mastigocoleus testarum]
gi|663218502	55	42656	1	1	1	1	0.08	beta-lactamase [Streptacidiphilus jeojiense]
gi|664517292	43	33706	1	1	1	1	0.10	beta-lactamase [Streptomyces olivaceus]
gi|494200545	56	96623	1	1	1	1	0.03	bifunctional acetaldehyde-CoA/alcohol dehydrogenase [Lactobacillus ultunensis]
gi|506255916	61	115949	1	1	1	1	0.03	bifunctional glutamine-synthetase adenylyltransferase/deadenyltransferase [Brachybacterium faecium]
gi|446728460	58	50784	1	1	1	1	0.06	bifunctional heptose 7-phosphate kinase/heptose 1-phosphate adenyltransferase [Vibrio cholerae]
gi|493230419	60	82702	1	1	1	1	0.04	bifunctional malic enzyme oxidoreductase/phosphotransacetylase [Mesorhizobium amorphae]
gi|504120115	58	148922	1	1	1	1	0.02	bifunctional proline dehydrogenase/pyrroline-5-carboxylate dehydrogenase [Wigglesworthia glossinidia]
gi|497210967	58	46476	1	1	1	1	0.07	bifunctional ribonuclease G/cytoplasmic axial filament protein [Peptostreptococcaceae bacterium ACC19a]
gi|497210967	52	46476	1	1	1	1	0.07	bifunctional ribonuclease G/cytoplasmic axial filament protein [Peptostreptococcaceae bacterium ACC19a]
gi|503602027	35	39217	1	1	1	1	0.08	biotin synthase [Thioalkalimicrobium cyclicum]
gi|499557358	59	28162	2	2	1	1	0.12	biotin-(acetyl-CoA carboxylase) ligase [Aromatoleum aromaticum]
gi|499557358	55	28162	2	2	1	1	0.12	biotin-(acetyl-CoA carboxylase) ligase [Aromatoleum aromaticum]
gi|494278428	66	49418	2	2	2	2	0.14	branched-chain alpha-keto acid dehydrogenase subunit E2 [Pseudomonas psychrotolerans]
gi|492819075	60	11850	1	1	1	1	0.29	branched-chain amino acid ABC transporter permease [Pectobacterium wasabiae]
gi|489387362	54	33969	2	2	2	2	0.20	branched-chain amino acid aminotransferase [Pseudomonas stutzeri]
gi|489378522	67	33908	2	2	2	2	0.21	branched-chain amino acid aminotransferase [Pseudomonas stutzeri]
gi|489387362	73	33969	3	3	2	2	0.20	branched-chain amino acid aminotransferase [Pseudomonas stutzeri]
gi|499631912	58	34146	1	1	1	1	0.10	branched-chain amino acid aminotransferase [Thiobacillus denitrificans]
gi|651244013	83	41160	2	2	1	1	0.08	C4-dicarboxylate ABC transporter [Afifella pfennigii]
gi|651244013	123	41160	4	4	2	2	0.17	C4-dicarboxylate ABC transporter [Afifella pfennigii]
gi|651244013	112	41160	2	2	1	1	0.08	C4-dicarboxylate ABC transporter [Afifella pfennigii]
gi|489158467	36	41149	1	1	1	1	0.08	C4-dicarboxylate ABC transporter [Comamonas testosteroni]
gi|488807077	62	38792	1	1	1	1	0.09	C4-dicarboxylate ABC transporter [Rhodobacter sphaeroides]
gi|492890695	54	86883	1	1	1	1	0.04	cadmium-translocating P-type ATPase [Burkholderia thailandensis]
gi|543578522	77	23404	4	4	1	1	0.31	calcium-binding protein [Comamonas sp. B-9]
gi|543578522	79	23404	2	2	1	1	0.14	calcium-binding protein [Comamonas sp. B-9]
gi|543578522	126	23404	6	6	1	1	0.31	calcium-binding protein [Comamonas sp. B-9]
gi|494034161	65	58289	2	2	1	1	0.06	capsule biosynthesis protein, putative [Plesiocystis pacifica]
gi|652461923	68	88283	1	1	1	1	0.04	carbon monoxide dehydrogenase [Geodermatophilaceae bacterium URHB0062]
gi|501800840	55	86072	1	1	1	1	0.04	carbon monoxide dehydrogenase [Thermomicrobium roseum]
gi|501800840	59	86072	1	1	1	1	0.04	carbon monoxide dehydrogenase [Thermomicrobium roseum]
gi|496515154	47	42442	1	1	1	1	0.08	carboxynorspermidine decarboxylase [Paenibacillus sp. oral taxon 786]
gi|594127797	50	47584	1	1	1	1	0.07	carboxypeptidase [Streptomyces sp. PRh5]
gi|3282392	56	12269	1	1	1	1	0.28	carboxysome shell peptide CsoS1B [Thiobacillus denitrificans]
gi|3282392	55	12269	2	2	2	2	0.63	carboxysome shell peptide CsoS1B [Thiobacillus denitrificans]
gi|491324047	515	57673	17	17	11	11	0.84	catalase [Acinetobacter sp. CIP 53.82]
gi|3927890	86	54653	2	2	1	1	0.06	Catalase [Desulfovibrio vulgaris]
gi|520401	60	57810	1	1	1	1	0.06	catalase [Haemophilus influenzae]
gi|500251659	103	54071	2	2	2	2	0.13	catalase [Pseudomonas stutzeri]
gi|504938131	67	37504	1	1	1	1	0.09	catalase [Synechococcus sp. PCC 6312]
gi|488802418	78	25368	4	4	1	1	0.13	cation efflux system protein CzcA [Afipia clevelandensis]
gi|488802418	61	25368	1	1	1	1	0.13	cation efflux system protein CzcA [Afipia clevelandensis]
gi|673060146	60	75304	1	1	1	1	0.04	caudovirus prohead protease family protein [Delftia acidovorans]
gi|284518872	42	20275	1	1	1	1	0.17	CcbK [Streptomyces caelestis]
gi|500469336	60	67691	2	2	1	1	0.05	cell division protein FtsH [Synechococcus sp. RCC307]
gi|500469336	59	67691	2	2	1	1	0.05	cell division protein FtsH [Synechococcus sp. RCC307]
gi|586964321	44	51102	1	1	1	1	0.06	cell division protein FtsI [Intrasporangium oryzae NRRL B-24470]
gi|494431279	62	82999	1	1	1	1	0.04	cell division protein FtsK [marine gamma proteobacterium HTCC2143]
gi|488485491	52	82447	1	1	1	1	0.04	cell division protein FtsK [Propionibacterium humerusii]
gi|327200737	58	41963	1	1	1	1	0.08	Chain A, Crystal Structure Of Nysgrc Enolase Target 200555, A Putative Dipeptide Epimerase From Francisella Philomiragia : Tartrate Bound, No Mg
gi|327200737	54	41963	1	1	1	1	0.08	Chain A, Crystal Structure Of Nysgrc Enolase Target 200555, A Putative Dipeptide Epimerase From Francisella Philomiragia : Tartrate Bound, No Mg
gi|17942686	769	66878	21	21	4	4	0.21	Chain A, Glucosamine 6-Phosphate Synthase With Glucose 6-Phosphate
gi|157830666	125	8681	2	2	2	2	0.97	Chain A, Investigation Of The Solution Conformation Of Cytochrome C- 551 From Pseudomonas Stutzeri
gi|5822132	41	40424	1	1	1	1	0.08	Chain A, Isomerase Domain Of Glucosamine 6-phosphate Synthase Complexed With 2- Amino-2-deoxyglucitol 6-phosphate
gi|225733897	1694	18808	97	97	6	6	2.75	Chain A, Solution Structure Of E.Coli Slyd
gi|297787753	130	74039	4	4	3	3	0.14	Chain A, Structure Of The Qb Replicase, An Rna-Dependent Rna Polymerase Consisting Of Viral And Host Proteins
gi|307568413	58	17739	1	1	1	1	0.19	Chain A, The Crystal Structure Of Functionally Unknown Conserved Protein Domain From Neisseria Meningitidis Mc58
gi|1943057	27	23761	1	1	1	1	0.14	Chain A, The Substrate Binding Domain Of Dnak In Complex With A Substrate Peptide, Determined From Type 1 Selenomethionyl Crystals
gi|489376090	66	32602	1	1	1	1	0.10	chemotaxis protein [Pseudomonas stutzeri]
gi|404263414	63	61955	1	1	1	1	0.05	chemotaxis protein, partial [Bradyrhizobium sp. CCGE-LA001]
gi|498370616	65	17404	1	1	1	1	0.19	CheW protein [Methylobacterium mesophilicum]
gi|497438324	66	80530	1	1	1	1	0.04	choline sulfatase [Selenomonas sp. oral taxon 137]
gi|504190689	58	44759	1	1	1	1	0.07	chromosome partitioning protein [Blastococcus saxobsidens]
gi|491571565	111	28427	2	2	1	1	0.12	chromosome partitioning protein ParA [Sutterella wadsworthensis]
gi|491571565	83	28427	1	1	1	1	0.12	chromosome partitioning protein ParA [Sutterella wadsworthensis]
gi|489719896	58	143872	1	1	1	1	0.02	chromosome segregation ATPase [Lactobacillus delbrueckii]
gi|492912750	77	133429	2	2	1	1	0.02	chromosome segregation ATPase [Synechococcus sp. WH 7805]
gi|12584896	64	43163	1	1	1	1	0.08	citrate synthase [Ehrlichia sp. ERm58]
gi|76152052	85	13496	1	1	1	1	0.25	citrate synthase [uncultured Bartonella sp.]
gi|562741435	33	75830	1	1	1	1	0.04	citrate-dependent iron transporter [Pseudomonas taiwanensis SJ9]
gi|492840627	79	59176	1	1	1	1	0.06	cobalamin-binding protein [Desulfovibrio fructosivorans]
gi|504626517	66	52500	3	3	1	1	0.06	cobyric acid synthase [Mycobacterium chubuense]
gi|504626517	57	52500	1	1	1	1	0.06	cobyric acid synthase [Mycobacterium chubuense]
gi|504626517	60	52500	1	1	1	1	0.06	cobyric acid synthase [Mycobacterium chubuense]
gi|152068191	58	16902	1	1	1	1	0.20	conserved hypothetical protein [Beggiatoa sp. PS]
gi|256955771	64	16471	1	1	1	1	0.21	conserved hypothetical protein [Enterococcus faecalis HIP11704]
gi|666612167	59	19996	1	1	1	1	0.17	conserved hypothetical protein [Xenorhabdus bovienii str. kraussei Quebec]
gi|666612167	62	19996	2	2	1	1	0.37	conserved hypothetical protein [Xenorhabdus bovienii str. kraussei Quebec]
gi|239787382	56	16404	1	1	1	1	0.21	conserved uncharacterized protein [uncultured bacterium]
gi|239787382	57	16404	1	1	1	1	0.21	conserved uncharacterized protein [uncultured bacterium]
gi|10047063	96	67650	2	2	1	1	0.05	CopA protein [Ralstonia metallidurans CH34]
gi|344175171	49	35143	1	1	1	1	0.09	copB ATPase, Copper resistance protein B precursor [Ralstonia syzygii R24]
gi|492902170	70	69631	1	1	1	1	0.05	copper oxidase [Moritella sp. PE36]
gi|492902170	66	69631	4	4	2	2	0.10	copper oxidase [Moritella sp. PE36]
gi|494141087	156	66420	4	4	2	2	0.10	copper oxidase [Rhodanobacter fulvus]
gi|489231194	76	38047	1	1	1	1	0.09	copper resistance protein B [Pseudomonas aeruginosa]
gi|496496717	83	39397	1	1	1	1	0.08	copper resistance protein B [Sulfuricella denitrificans]
gi|497295383	72	35690	2	2	1	1	0.09	Copper resistance protein B [Xanthomonas translucens]
gi|497295383	65	35690	1	1	1	1	0.09	Copper resistance protein B [Xanthomonas translucens]
gi|659886816	159	68033	6	6	3	3	0.15	copper resistance protein CopA [Thiomicrospira pelophila]
gi|655389290	75	26025	1	1	1	1	0.13	copper resistance protein CopB [Thalassobaculum salexigens]
gi|546732749	69	87522	1	1	1	1	0.04	copper-exporting ATPase [Firmicutes bacterium CAG:110]
gi|487986011	58	72370	3	3	3	3	0.14	copper-resistance protein, CopA family [Acinetobacter baumannii]
gi|410006786	56	22344	1	1	1	1	0.15	cupin domain protein [Leptospira kirschneri str. H2]
gi|410006786	60	22344	2	2	1	1	0.15	cupin domain protein [Leptospira kirschneri str. H2]
gi|504560751	63	37954	1	1	1	1	0.09	curculin domain-containing protein [Tistrella mobilis]
gi|505117989	67	24050	2	2	1	1	0.14	Cutinase [Mycobacterium smegmatis]
gi|504190622	61	33545	1	1	1	1	0.10	cyclase [Blastococcus saxobsidens]
gi|9965291	163	26143	2	2	1	1	0.13	cyclohexanol dehydrogenase [Acinetobacter sp. SE19]
gi|9965291	110	26143	1	1	1	1	0.13	cyclohexanol dehydrogenase [Acinetobacter sp. SE19]
gi|9965291	249	26143	5	5	3	3	0.43	cyclohexanol dehydrogenase [Acinetobacter sp. SE19]
gi|640257656	63	22424	2	2	1	1	0.15	cysteine hydrolase [Cellulosimicrobium cellulans]
gi|490857938	54	34678	1	1	1	1	0.10	cysteine synthase A [Acinetobacter guillouiae]
gi|490857938	72	34678	2	2	2	2	0.20	cysteine synthase A [Acinetobacter guillouiae]
gi|490831144	162	34742	5	5	3	3	0.31	cysteine synthase A [Acinetobacter johnsonii]
gi|408504805	40	6773	1	1	1	1	0.53	cysteine-rich helical bundle repeat protein [Acinetobacter baumannii OIFC0162]
gi|408504805	45	6773	1	1	1	1	0.53	cysteine-rich helical bundle repeat protein [Acinetobacter baumannii OIFC0162]
gi|516760321	60	24873	1	1	1	1	0.13	cytidylate kinase [Streptomyces sp. FxanaC1]
gi|499245897	128	52885	3	3	2	2	0.13	cytochrome B6 [Geobacter sulfurreducens]
gi|499245897	82	52885	4	4	3	3	0.20	cytochrome B6 [Geobacter sulfurreducens]
gi|493924522	77	52564	2	2	2	2	0.13	cytochrome B6 [Legionella drancourtii]
gi|493924522	117	52564	2	2	2	2	0.13	cytochrome B6 [Legionella drancourtii]
gi|330949201	56	4776	1	1	1	1	0.77	cytochrome c oxidase cbb3-type, subunit III [Pseudomonas syringae pv. pisi str. 1704B]
gi|268584477	58	30571	1	1	1	1	0.11	cytochrome C1 [Neisseria gonorrhoeae PID18]
gi|268584477	52	30571	1	1	1	1	0.11	cytochrome C1 [Neisseria gonorrhoeae PID18]
gi|499630345	55	12842	1	1	1	1	0.27	cytochrome CBB3 [Thiobacillus denitrificans]
gi|498185039	55	53665	1	1	1	1	0.06	cytochrome D ubiquinol oxidase subunit I [Lactobacillus acidipiscis]
gi|499630342	44	31172	2	2	1	1	0.11	cytochrome SoxA [Thiobacillus denitrificans]
gi|517333069	74	31286	2	2	1	1	0.11	cytochrome SoxA [Thiobacillus thioparus]
gi|517333069	45	31286	1	1	1	1	0.11	cytochrome SoxA [Thiobacillus thioparus]
gi|517333069	58	31286	1	1	1	1	0.11	cytochrome SoxA [Thiobacillus thioparus]
gi|674767815	60	42914	1	1	1	1	0.08	cytosine deaminase [Devosia riboflavina]
gi|498231211	60	17908	2	2	1	1	0.19	cytosine deaminase [Sphingomonas elodea]
gi|498231211	58	17908	3	3	1	1	0.19	cytosine deaminase [Sphingomonas elodea]
gi|498231211	55	17908	2	2	1	1	0.19	cytosine deaminase [Sphingomonas elodea]
gi|487861068	55	39844	1	1	1	1	0.08	D-ala D-ala ligase protein [Helicobacter pylori]
gi|505437736	59	161610	1	1	1	1	0.02	DEAD/DEAH box helicase domain-containing protein [Actinoplanes sp. N902-109]
gi|505437736	58	161610	2	2	1	1	0.02	DEAD/DEAH box helicase domain-containing protein [Actinoplanes sp. N902-109]
gi|494048403	62	36613	2	2	1	1	0.09	dehydrogenase [Glaciecola mesophila]
gi|498009882	89	64174	3	3	2	2	0.11	dehydrogenase [Marinobacterium stanieri]
gi|567776209	45	26368	1	1	1	1	0.13	dehydrogenase [Microbispora sp. ATCC PTA-5024]
gi|489375334	122	64636	3	3	2	2	0.10	dehydrogenase [Pseudomonas stutzeri]
gi|500262507	74	71748	2	2	2	2	0.09	dehydrogenase [Pseudomonas stutzeri]
gi|489375334	92	64636	1	1	1	1	0.05	dehydrogenase [Pseudomonas stutzeri]
gi|493599258	63	20838	2	2	1	1	0.16	dehydrogenase, partial [Rhodococcus pyridinivorans]
gi|497268294	75	60018	2	2	1	1	0.05	Delta-1-pyrroline-5-carboxylate dehydrogenase [Fulvivirga imtechensis]
gi|491027513	35	36345	1	1	1	1	0.09	delta-aminolevulinic acid dehydratase [Anoxybacillus flavithermus]
gi|499647205	65	69164	1	1	1	1	0.05	deoxycytidylate deaminase [Pseudoalteromonas haloplanktis]
gi|491438493	62	47432	1	1	1	1	0.07	deoxyguanosinetriphosphate triphosphohydrolase [Corynebacterium jeikeium]
gi|491438493	60	47432	1	1	1	1	0.07	deoxyguanosinetriphosphate triphosphohydrolase [Corynebacterium jeikeium]
gi|492855474	58	59743	1	1	1	1	0.06	deoxyribodipyrimidine photolyase-related protein [Glaciecola pallidula]
gi|503472762	57	42997	1	1	1	1	0.08	diaminopimelate aminotransferase [Desulfobacca acetoxidans]
gi|490775052	91	26952	5	5	3	3	0.42	dienelactone hydrolase [Acinetobacter haemolyticus]
gi|686988394	50	25416	1	1	1	1	0.13	diguanylate cyclase [Alcanivorax jadensis T9]
gi|503352237	57	67475	1	1	1	1	0.05	diguanylate cyclase [Burkholderia sp. CCGE1001]
gi|497188385	57	19925	2	2	1	1	0.17	diguanylate cyclase [Citreicella sp. 357]
gi|490788682	188	32044	4	4	2	2	0.22	dihydrodipicolinate synthase [Acinetobacter bohemicus]
gi|490829725	199	32096	4	4	2	2	0.22	dihydrodipicolinate synthase [Acinetobacter johnsonii]
gi|490829725	205	32096	8	8	5	5	0.64	dihydrodipicolinate synthase [Acinetobacter johnsonii]
gi|495955237	59	50482	1	1	1	1	0.07	dihydrolipoyl dehydrogenase [Rhodopirellula sallentina]
gi|495955237	61	50482	4	4	1	1	0.07	dihydrolipoyl dehydrogenase [Rhodopirellula sallentina]
gi|495502092	63	14366	1	1	1	1	0.24	Dihydroneopterin aldolase [Richelia intracellularis]
gi|584421873	66	30973	2	2	1	1	0.11	dihydropteroate synthase [Pseudoalteromonas lipolytica SCSIO 04301]
gi|516771181	57	31248	1	1	1	1	0.11	dihydropteroate synthase [Streptomyces sp. FxanaC1]
gi|498315265	56	63517	1	1	1	1	0.05	dihydroxy-acid dehydratase [Halomonas sp. KM-1]
gi|498315265	66	63517	1	1	1	1	0.05	dihydroxy-acid dehydratase [Halomonas sp. KM-1]
gi|489282985	59	24078	1	1	1	1	0.14	dimethylallyltransferase [Pseudomonas fluorescens]
gi|489282985	68	24078	3	3	1	1	0.14	dimethylallyltransferase [Pseudomonas fluorescens]
gi|489282985	56	24078	1	1	1	1	0.14	dimethylallyltransferase [Pseudomonas fluorescens]
gi|505369031	74	74071	1	1	1	1	0.04	Dipeptidyl aminopeptidases/acylaminoacyl-peptidases [Fretibacterium fastidiosum]
gi|505369031	59	74071	1	1	1	1	0.04	Dipeptidyl aminopeptidases/acylaminoacyl-peptidases [Fretibacterium fastidiosum]
gi|505369031	110	74071	2	2	1	1	0.04	Dipeptidyl aminopeptidases/acylaminoacyl-peptidases [Fretibacterium fastidiosum]
gi|30525497	52	39311	1	1	1	1	0.08	dissimilatory sulfite reductase alpha subunit [uncultured sulfate-reducing bacterium]
gi|14021652	56	100312	1	1	1	1	0.03	DNA gyrase subunit A [Mesorhizobium loti MAFF303099]
gi|503431959	57	96342	1	1	1	1	0.03	DNA gyrase subunit A [Sphingobacterium sp. 21]
gi|501383826	74	72306	3	3	1	1	0.05	DNA ligase [Elusimicrobium minutum]
gi|501383826	87	72306	2	2	1	1	0.05	DNA ligase [Elusimicrobium minutum]
gi|501383826	54	72306	1	1	1	1	0.05	DNA ligase [Elusimicrobium minutum]
gi|499245104	37	66879	1	1	1	1	0.05	DNA mismatch repair protein MutL [Geobacter sulfurreducens]
gi|548128592	51	122046	1	1	1	1	0.03	dNA or RNA helicases of superfamily II [Dialister sp. CAG:357]
gi|159880610	56	43225	1	1	1	1	0.08	DNA polymerase I (PolI) [Hydrogenivirga sp. 128-5-R1-1]
gi|159880610	57	43225	1	1	1	1	0.08	DNA polymerase I (PolI) [Hydrogenivirga sp. 128-5-R1-1]
gi|499558702	66	30016	1	1	1	1	0.11	DNA polymerase III [Aromatoleum aromaticum]
gi|147759374	66	48000	2	2	1	1	0.07	DNA polymerase III DnaE [Streptococcus pneumoniae SP14-BS69]
gi|147759374	58	48000	2	2	1	1	0.07	DNA polymerase III DnaE [Streptococcus pneumoniae SP14-BS69]
gi|499612859	61	34110	1	1	1	1	0.10	DNA polymerase III subunit epsilon [Prochlorococcus marinus]
gi|498448441	63	50319	5	5	1	1	0.07	DNA polymerase V [Enterococcus asini]
gi|498448441	48	50319	1	1	1	1	0.07	DNA polymerase V [Enterococcus asini]
gi|498448441	62	50319	4	4	1	1	0.07	DNA polymerase V [Enterococcus asini]
gi|651086967	60	38519	1	1	1	1	0.09	DNA processing chain A [Wolbachia endosymbiont of Cimex lectularius]
gi|499316242	57	46923	1	1	1	1	0.07	DNA recombination protein RmuC [Chlamydophila caviae]
gi|656077079	80	41405	2	2	1	1	0.08	DNA repair exonuclease [Mycobacterium sp. URHD0025]
gi|684998592	57	15641	2	2	1	1	0.22	DNA repair protein RadC [Pectobacterium carotovorum subsp. brasiliense]
gi|684998592	55	15641	1	1	1	1	0.22	DNA repair protein RadC [Pectobacterium carotovorum subsp. brasiliense]
gi|491505222	56	63564	1	1	1	1	0.05	DNA repair protein RecN [Eubacterium ventriosum]
gi|491290260	58	61586	1	1	1	1	0.05	DNA repair protein RecN [Mycobacterium rhodesiae]
gi|489621791	61	42459	1	1	1	1	0.08	DNA topoisomerase [Sinorhizobium meliloti]
gi|636805164	58	100448	1	1	1	1	0.03	DNA topoisomerase I [Actinomyces neuii]
gi|488817957	91	99632	3	3	1	1	0.03	DNA topoisomerase I [Phaeospirillum molischianum]
gi|488817957	92	99632	3	3	1	1	0.03	DNA topoisomerase I [Phaeospirillum molischianum]
gi|495621966	71	53701	1	1	1	1	0.06	DNA-binding protein [Burkholderia sp. SJ98]
gi|636963855	62	37533	1	1	1	1	0.09	DNA-binding protein [Streptococcus suis]
gi|595643218	38	9007	1	1	1	1	0.39	DNA-damage-inducible protein I [Yersinia enterocolitica LC20]
gi|536900023	59	147436	1	1	1	1	0.02	DNA-directed RNA polymerase subunit beta' [Corynebacterium argentoratense]
gi|410762863	59	19636	1	1	1	1	0.17	DnaJ domain protein [Leptospira interrogans serovar Bataviae str. L1111]
gi|501050094	82	80122	2	2	1	1	0.04	dolichyl-phosphate-mannose-protein mannosyltransferase [Clostridium kluyveri]
gi|501050094	88	80122	3	3	1	1	0.04	dolichyl-phosphate-mannose-protein mannosyltransferase [Clostridium kluyveri]
gi|501050094	86	80122	3	3	1	1	0.04	dolichyl-phosphate-mannose-protein mannosyltransferase [Clostridium kluyveri]
gi|499632259	71	10457	2	2	1	1	0.33	DsrH protein [Thiobacillus denitrificans]
gi|586966647	55	41351	1	1	1	1	0.08	ECF subfamily RNA polymerase sigma-24 subunit [Intrasporangium oryzae NRRL B-24470]
gi|653104042	62	47930	3	3	1	1	0.07	electron transporter RnfC [Desulfosarcina sp. BuS5]
gi|498011574	198	43020	9	9	8	8	0.81	elongation factor Tu [Acinetobacter lwoffii]
gi|497403884	60	38226	1	1	1	1	0.09	endo-1,4-beta-xylanase [Streptomyces himastatinicus]
gi|446958029	58	39460	1	1	1	1	0.08	endo-beta-N-acetylglucosaminidase [Streptococcus pseudopneumoniae]
gi|659876778	75	172391	3	3	1	1	0.02	endonuclease [Nocardia otitidiscaviarum]
gi|659876778	72	172391	3	3	1	1	0.02	endonuclease [Nocardia otitidiscaviarum]
gi|659876778	64	172391	1	1	1	1	0.02	endonuclease [Nocardia otitidiscaviarum]
gi|503473426	58	46454	1	1	1	1	0.07	enolase [Coriobacterium glomerans]
gi|495773855	66	26148	1	1	1	1	0.13	Enoyl-CoA hydratase [Planococcus halocryophilus]
gi|495773855	74	26148	2	2	1	1	0.13	Enoyl-CoA hydratase [Planococcus halocryophilus]
gi|495773855	79	26148	2	2	1	1	0.13	Enoyl-CoA hydratase [Planococcus halocryophilus]
gi|489547495	56	106792	1	1	1	1	0.03	enterotoxin [Clostridium perfringens]
gi|694020294	56	33530	1	1	1	1	0.10	epimerase [Rhodococcus fascians]
gi|694020294	62	33530	2	2	1	1	0.10	epimerase [Rhodococcus fascians]
gi|664350596	38	50892	2	2	1	1	0.06	erythritol kinase [Streptomyces sp. NRRL S-1868]
gi|691137765	138	33151	3	3	2	2	0.21	esterase [Acinetobacter baumannii]
gi|691137765	134	33151	3	3	1	1	0.10	esterase [Acinetobacter baumannii]
gi|654674940	62	42064	1	1	1	1	0.08	esterase [Bradyrhizobium japonicum]
gi|654674940	56	42064	1	1	1	1	0.08	esterase [Bradyrhizobium japonicum]
gi|654674940	51	42064	1	1	1	1	0.08	esterase [Bradyrhizobium japonicum]
gi|493223150	56	113025	1	1	1	1	0.03	excinuclease ABC subunit B [Mesorhizobium amorphae]
gi|648658994	59	11333	1	1	1	1	0.30	excinuclease ABC subunit C [Dyadobacter beijingensis]
gi|489020093	64	127040	1	1	1	1	0.03	exodeoxyribonuclease V subunit gamma [Thauera sp. 28]
gi|489822406	53	42388	1	1	1	1	0.08	exonuclease [Listeria monocytogenes]
gi|639553765	76	113873	2	2	1	1	0.03	exonuclease SbcC [Vibrio parahaemolyticus]
gi|639553765	61	113873	2	2	1	1	0.03	exonuclease SbcC [Vibrio parahaemolyticus]
gi|491321484	86	97070	3	3	1	1	0.03	Exonuclease SbcC [Yersinia enterocolitica]
gi|491321484	79	97070	4	4	1	1	0.03	Exonuclease SbcC [Yersinia enterocolitica]
gi|491321484	119	97070	6	6	1	1	0.03	Exonuclease SbcC [Yersinia enterocolitica]
gi|145961076	55	129820	1	1	1	1	0.03	exonuclease V subunit gamma [Vibrionales bacterium SWAT-3]
gi|489744501	61	121004	1	1	1	1	0.03	exopolyphosphatase [Lactobacillus gasseri]
gi|499072583	85	20847	1	1	1	1	0.16	exported hypothetical protein [Tetrasphaera elongata]
gi|505291457	139	37220	6	6	5	5	0.53	extracellular solute-binding protein [Pseudomonas denitrificans]
gi|588309786	254	36959	10	10	5	5	0.54	extracellular solute-binding protein [Pseudomonas sp. BAY1663]
gi|371910551	132	37633	5	5	2	2	0.18	extracellular solute-binding protein [uncultured bacterium]
gi|371910551	85	37633	2	2	2	2	0.18	extracellular solute-binding protein [uncultured bacterium]
gi|371910551	95	37633	3	3	2	2	0.18	extracellular solute-binding protein [uncultured bacterium]
gi|505226851	238	64507	7	7	4	4	0.22	Extracellular solute-binding protein family 1 [Desulfovibrio piezophilus]
gi|672392896	95	66944	3	3	1	1	0.05	extracellular solute-binding protein, family 5 [bacterium UASB14]
gi|269828349	60	35025	1	1	1	1	0.09	extracellular solute-binding protein, family 7 [Vibrio alginolyticus 40B]
gi|269828349	69	35025	2	2	1	1	0.09	extracellular solute-binding protein, family 7 [Vibrio alginolyticus 40B]
gi|499177372	133	24050	3	3	1	1	0.14	F0F1 ATP synthase subunit B [Mycoplasma pneumoniae]
gi|499177372	110	24050	3	3	1	1	0.14	F0F1 ATP synthase subunit B [Mycoplasma pneumoniae]
gi|499177372	177	24050	6	6	1	1	0.14	F0F1 ATP synthase subunit B [Mycoplasma pneumoniae]
gi|517722695	65	51264	1	1	1	1	0.06	FAD-binding monooxygenase [Streptomyces sp. CNT302]
gi|495823957	58	91261	1	1	1	1	0.04	FAD-dependent oxidoreductase [Pseudovibrio sp. JE062]
gi|652338794	68	17600	1	1	1	1	0.19	ferredoxin [Fischerella sp. PCC 9605]
gi|652338794	72	17600	2	2	1	1	0.19	ferredoxin [Fischerella sp. PCC 9605]
gi|652338794	60	17600	1	1	1	1	0.19	ferredoxin [Fischerella sp. PCC 9605]
gi|489373695	43	12876	1	1	1	1	0.27	ferredoxin [Pseudomonas stutzeri]
gi|33456995	36	38129	1	1	1	1	0.09	ferredoxin reductase [Cycloclasticus sp. A5]
gi|505289035	63	86462	1	1	1	1	0.04	ferric vibrioferrin receptor [Pseudomonas denitrificans]
gi|489383625	227	77762	7	7	6	6	0.28	ferric vibrioferrin receptor [Pseudomonas stutzeri]
gi|494023410	57	79703	1	1	1	1	0.04	Fe-S oxidoreductase FadF [Desulfotignum phosphitoxidans]
gi|490284994	48	22909	1	1	1	1	0.15	FIG123464: Polysaccharide export protein [Nitrosospira sp. APG3]
gi|490284994	58	22909	1	1	1	1	0.15	FIG123464: Polysaccharide export protein [Nitrosospira sp. APG3]
gi|490367339	65	16331	2	2	1	1	0.21	fimbrial assembly protein [Proteus mirabilis]
gi|497776389	57	49273	1	1	1	1	0.07	Fis family transcriptional regulator [Burkholderia ubonensis]
gi|504226862	59	51928	1	1	1	1	0.06	Fis family transcriptional regulator [Rhodospirillum photometricum]
gi|501356955	73	41598	2	2	1	1	0.08	flagellar basal body P-ring protein [Leptospira biflexa]
gi|527114814	62	17224	2	2	1	1	0.20	Flagellar basal body-associated protein FliL [Shewanella piezotolerans]
gi|497207878	53	41465	1	1	1	1	0.08	flagellar biosynthesis protein FlhB [Ralstonia sp. PBA]
gi|404264905	102	13290	2	2	1	1	0.26	flagellar biosynthesis regulatory protein FlaF [Bradyrhizobium sp. CCGE-LA001]
gi|404264905	76	13290	2	2	1	1	0.26	flagellar biosynthesis regulatory protein FlaF [Bradyrhizobium sp. CCGE-LA001]
gi|404264905	76	13290	1	1	1	1	0.26	flagellar biosynthesis regulatory protein FlaF [Bradyrhizobium sp. CCGE-LA001]
gi|497925586	129	39464	3	3	2	2	0.17	flagellar motor protein MotB [Citromicrobium bathyomarinum]
gi|497925586	109	39464	3	3	2	2	0.17	flagellar motor protein MotB [Citromicrobium bathyomarinum]
gi|493886845	63	38035	1	1	1	1	0.09	flagellar motor protein MotB [Erythrobacter sp. SD-21]
gi|493359747	51	28802	1	1	1	1	0.12	Flagellar motor rotation protein MotB [Clostridiaceae bacterium L21-TH-D2]
gi|82523971	58	37722	1	1	1	1	0.09	flagellar motor switch protein [uncultured epsilon proteobacterium]
gi|658434155	102	35425	2	2	1	1	0.09	flagellar motor switch protein FliG, partial [Aliihoeflea sp. 2WW]
gi|658434155	218	35425	6	6	1	1	0.09	flagellar motor switch protein FliG, partial [Aliihoeflea sp. 2WW]
gi|658434155	140	35425	4	4	1	1	0.09	flagellar motor switch protein FliG, partial [Aliihoeflea sp. 2WW]
gi|515787865	59	28704	1	1	1	1	0.12	flagellin [Moritella dasanensis]
gi|504633386	53	41083	1	1	1	1	0.08	flagellin [Pseudomonas stutzeri]
gi|504120124	63	20043	2	2	1	1	0.17	flavodoxin [Wigglesworthia glossinidia]
gi|504120124	60	20043	1	1	1	1	0.17	flavodoxin [Wigglesworthia glossinidia]
gi|446077139	63	57637	4	4	1	1	0.06	flotillin [Bacillus cereus]
gi|446077139	66	57637	2	2	1	1	0.06	flotillin [Bacillus cereus]
gi|446077139	58	57637	1	1	1	1	0.06	flotillin [Bacillus cereus]
gi|18266232	58	40111	2	2	1	1	0.08	formyltetrahydrofolate synthetase [uncultured environmental landfill bacterium]
gi|488724945	50	33470	1	1	1	1	0.10	Fructose-1-phosphate kinase and related fructose-6-phosphate kinase (PfkB) [Planctomyces maris]
gi|544986156	54	75350	1	1	1	1	0.04	ftsX-like permease family protein [Peptoclostridium difficile]
gi|654296112	40	17935	2	2	1	1	0.19	GCN5 family acetyltransferase [Burkholderia cenocepacia]
gi|206592198	59	20017	2	2	1	1	0.17	gcn5-related n-acetyltransferase protein [Ralstonia solanacearum IPO1609]
gi|548006948	227	36526	5	5	2	2	0.19	general L-amino acid-binding periplasmic protein AapJ [Sutterella sp. CAG:397]
gi|548006948	164	36526	3	3	2	2	0.19	general L-amino acid-binding periplasmic protein AapJ [Sutterella sp. CAG:397]
gi|548006948	344	36526	6	6	2	2	0.19	general L-amino acid-binding periplasmic protein AapJ [Sutterella sp. CAG:397]
gi|319408368	58	52255	1	1	1	1	0.06	gid-family protein [Bartonella schoenbuchensis R1]
gi|651297603	68	34581	3	3	1	1	0.10	glmZ(sRNA)-inactivating NTPase [Actinobaculum schaalii]
gi|651297603	71	34581	3	3	1	1	0.10	glmZ(sRNA)-inactivating NTPase [Actinobaculum schaalii]
gi|651297603	80	34581	5	5	1	1	0.10	glmZ(sRNA)-inactivating NTPase [Actinobaculum schaalii]
gi|498247259	52	66139	2	2	1	1	0.05	glucosamine--fructose-6-phosphate aminotransferase [Pseudoalteromonas spongiae]
gi|503865921	81	48026	2	2	1	1	0.07	glucose-1-phosphate adenylyltransferase [Candidatus Chloracidobacterium thermophilum]
gi|503865921	69	48026	1	1	1	1	0.07	glucose-1-phosphate adenylyltransferase [Candidatus Chloracidobacterium thermophilum]
gi|503865921	100	48026	2	2	1	1	0.07	glucose-1-phosphate adenylyltransferase [Candidatus Chloracidobacterium thermophilum]
gi|491050841	136	49157	11	11	7	7	0.58	glutamate dehydrogenase [Acinetobacter junii]
gi|488903149	33	55409	1	1	1	1	0.06	glutamate synthase [Nitrosococcus oceani]
gi|488436607	45	167253	1	1	1	1	0.02	glutamate synthase [Staphylococcus sp. OJ82]
gi|504057269	62	45420	2	2	1	1	0.07	glutamate-1-semialdehyde aminotransferase [Oceanimonas sp. GK1]
gi|503092191	52	46248	1	1	1	1	0.07	glutamate-1-semialdehyde aminotransferase [Sulfurimonas autotrophica]
gi|490788048	65	104847	3	3	1	1	0.03	glutamate-ammonia-ligase adenylyltransferase [Acinetobacter bohemicus]
gi|654599427	56	42473	1	1	1	1	0.08	glutamate--cysteine ligase [Solirubrobacter soli]
gi|599571049	53	30880	1	1	1	1	0.11	Glutamine amidotransferases class-II [Chondromyces apiculatus DSM 436]
gi|489390721	164	52004	6	6	4	4	0.36	glutamine synthetase [Pseudomonas stutzeri]
gi|489390721	196	52004	10	10	5	5	0.45	glutamine synthetase [Pseudomonas stutzeri]
gi|489390721	233	52004	14	14	9	9	0.85	glutamine synthetase [Pseudomonas stutzeri]
gi|489378275	79	49256	1	1	1	1	0.07	glutathione reductase [Pseudomonas stutzeri]
gi|489378275	84	49256	2	2	2	2	0.14	glutathione reductase [Pseudomonas stutzeri]
gi|488822792	61	29492	3	3	2	2	0.24	glutathione S-transferase [Microcystis aeruginosa]
gi|499558958	94	54818	3	3	2	2	0.12	glutathione synthase [Aromatoleum aromaticum]
gi|499558958	110	54818	4	4	2	2	0.12	glutathione synthase [Aromatoleum aromaticum]
gi|656082076	60	38167	2	2	1	1	0.09	glycerate kinase [Mycobacterium sp. URHB0044]
gi|517512200	138	54552	3	3	2	2	0.12	glycerol kinase [Actinokineospora enzanensis]
gi|656265943	97	56421	2	2	1	1	0.06	glycerol kinase [Arsenicicoccus bolidensis]
gi|489897357	60	54782	2	2	1	1	0.06	glycerol kinase [Arthrobacter globiformis]
gi|651480948	72	54898	2	2	2	2	0.12	glycerol kinase [Arthrobacter sp. Br18]
gi|551275273	173	55212	4	4	3	3	0.19	glycerol kinase [Corynebacterium-like bacterium B27]
gi|551275273	202	55212	5	5	3	3	0.19	glycerol kinase [Corynebacterium-like bacterium B27]
gi|551263834	153	55068	6	6	3	3	0.19	glycerol kinase [Glaciibacter superstes]
gi|503348831	78	55043	2	2	2	2	0.12	glycerol kinase [Microbacterium testaceum]
gi|663758370	147	54721	4	4	2	2	0.12	glycerol kinase [Prauserella rugosa]
gi|488493301	95	64492	4	4	2	2	0.10	Glycerol-3-phosphate ABC transporter, permease protein UgpA [Grimontia sp. AK16]
gi|654340765	101	44601	6	6	2	2	0.24	glycerophosphodiester phosphodiesterase [Maritalea myrionectae]
gi|654340765	76	44601	3	3	2	2	0.15	glycerophosphodiester phosphodiesterase [Maritalea myrionectae]
gi|497234670	116	46205	5	5	3	3	0.23	glycerophosphoryl diester phosphodiesterase [Burkholderiales bacterium JOSHI_001]
gi|497234670	104	46205	4	4	4	4	0.32	glycerophosphoryl diester phosphodiesterase [Burkholderiales bacterium JOSHI_001]
gi|505148598	147	46796	7	7	3	3	0.23	Glycerophosphoryl diester phosphodiesterase [Desulfovibrio hydrothermalis]
gi|505148598	94	46796	5	5	3	3	0.23	Glycerophosphoryl diester phosphodiesterase [Desulfovibrio hydrothermalis]
gi|504683365	163	46235	6	6	3	3	0.23	glycerophosphoryl diester phosphodiesterase [Marinobacter sp. BSs20148]
gi|498244397	81	46060	5	5	3	3	0.23	glycerophosphoryl diester phosphodiesterase [Pseudoalteromonas spongiae]
gi|503666806	184	45461	10	10	5	5	0.42	glycerophosphoryl diester phosphodiesterase [Ramlibacter tataouinensis]
gi|503666806	106	45461	6	6	5	5	0.42	glycerophosphoryl diester phosphodiesterase [Ramlibacter tataouinensis]
gi|492462772	106	42692	5	5	3	3	0.25	glycerophosphoryl diester phosphodiesterase [Sulfitobacter sp. EE-36]
gi|499632469	152	47221	7	7	4	4	0.31	glycerophosphoryl diester phosphodiesterase [Thiobacillus denitrificans]
gi|499632469	157	47221	6	6	3	3	0.31	glycerophosphoryl diester phosphodiesterase [Thiobacillus denitrificans]
gi|499632469	83	47221	5	5	4	4	0.31	glycerophosphoryl diester phosphodiesterase [Thiobacillus denitrificans]
gi|498441502	60	44135	1	1	1	1	0.07	glycine betaine/L-proline transport ATP binding subunit [Enterococcus raffinosus]
gi|496394236	55	78420	1	1	1	1	0.04	glycogen debranching enzyme GlgX [Rhodopirellula sp. SWK7]
gi|490207719	56	92961	1	1	1	1	0.04	glycogen phosphorylase [Gardnerella vaginalis]
gi|517254956	58	45472	1	1	1	1	0.07	glycolate oxidase [Burkholderia sp. JPY347]
gi|673003018	53	129369	2	2	1	1	0.03	glycoside hydrolase family protein [Bifidobacterium stellenboschense]
gi|491625870	74	71124	1	1	1	1	0.05	glycosyl hydrolase [Streptomyces bottropensis]
gi|313135172	57	88202	1	1	1	1	0.04	glycosyl hydrolase family 2, sugar binding domain protein [Bacteroides fragilis 3_1_12]
gi|576420673	58	64556	2	2	1	1	0.05	glycosyl hydrolases 15 family protein [Mycobacterium kansasii 732]
gi|501359963	52	36978	1	1	1	1	0.09	glycosyl transferase [Lactobacillus fermentum]
gi|489294675	49	43532	1	1	1	1	0.08	glycosyl transferase family 1 [Bacillus mycoides]
gi|493341089	51	39162	1	1	1	1	0.08	glycosyl transferase family protein [Holospora undulata]
gi|663625161	62	23000	2	2	1	1	0.15	glycosyltransferase [Actinoplanes subtropicus]
gi|492835717	56	39624	1	1	1	1	0.08	glycosyltransferase [Desulfovibrio africanus]
gi|494642041	69	34917	2	2	1	1	0.09	glycosyltransferase [Gluconacetobacter sp. SXCC-1]
gi|686469525	58	71684	1	1	1	1	0.05	Glycyl aminopeptidase [Sphingopyxis sp. LC81]
gi|497442993	76	20984	2	2	1	1	0.16	GNAT family acetyltransferase [Lachnospiraceae bacterium 2_1_46FAA]
gi|502856977	80	25312	2	2	1	1	0.13	GntR family transcriptional regulator [Burkholderia sp. CCGE1002]
gi|504456898	60	23427	1	1	1	1	0.14	GntR family transcriptional regulator [Halobacillus halophilus]
gi|664489861	64	26487	1	1	1	1	0.13	GntR family transcriptional regulator [Streptomyces sp. NRRL WC-3773]
gi|664489861	61	26487	2	2	1	1	0.13	GntR family transcriptional regulator [Streptomyces sp. NRRL WC-3773]
gi|664489861	75	26487	2	2	1	1	0.13	GntR family transcriptional regulator [Streptomyces sp. NRRL WC-3773]
gi|517221312	36	81902	1	1	1	1	0.04	GTP pyrophosphokinase [Methyloversatilis sp. NVD]
gi|506349721	53	48185	1	1	1	1	0.07	GTPase CgtA [Kosmotoga olearia]
gi|506349721	48	48185	1	1	1	1	0.07	GTPase CgtA [Kosmotoga olearia]
gi|506349721	46	48185	1	1	1	1	0.07	GTPase CgtA [Kosmotoga olearia]
gi|551015906	56	48610	1	1	1	1	0.07	GTP-binding protein [Butyrivibrio sp. AD3002]
gi|503372944	65	67808	1	1	1	1	0.05	GTP-binding protein LepA [Sphaerochaeta globosa]
gi|501372864	59	136327	1	1	1	1	0.02	guanylate cyclase [Burkholderia phymatum]
gi|563844116	63	79585	1	1	1	1	0.04	guanylyl cyclase [Mesorhizobium sp. L48C026A00]
gi|499611806	71	23226	1	1	1	1	0.14	HAD family hydrolase [Thermobifida fusca]
gi|499611806	60	23226	1	1	1	1	0.14	HAD family hydrolase [Thermobifida fusca]
gi|363645832	63	63793	1	1	1	1	0.05	HAD hydrolase, family IIIA [Klebsiella sp. 4_1_44FAA]
gi|151243	78	57252	2	2	1	1	0.06	heat shock protein [Pseudomonas aeruginosa]
gi|653080289	63	72302	2	2	1	1	0.05	heat shock protein 90 [Marinimicrobium agarilyticum]
gi|653080289	62	72302	1	1	1	1	0.05	heat shock protein 90 [Marinimicrobium agarilyticum]
gi|499820085	58	21955	1	1	1	1	0.15	heat shock protein GrpE [Rhodopseudomonas palustris]
gi|547313124	50	98041	1	1	1	1	0.03	helicase SNF2/RAD54 family [Roseburia sp. CAG:18]
gi|547313124	59	98041	2	2	1	1	0.07	helicase SNF2/RAD54 family [Roseburia sp. CAG:18]
gi|547313124	54	98041	1	1	1	1	0.03	helicase SNF2/RAD54 family [Roseburia sp. CAG:18]
gi|495366248	52	92176	1	1	1	1	0.04	helicase UvrD [Pseudomonas sp. GM84]
gi|328845569	58	57825	1	1	1	1	0.06	helix-turn-helix family protein [Brevundimonas diminuta ATCC 11568]
gi|495799614	57	134128	1	1	1	1	0.02	hemagglutinin [Rhizobium sp. Pop5]
gi|490285265	40	62359	1	1	1	1	0.05	Hemolysin activation/secretion protein associated with VreARI signalling system [Nitrosospira sp. APG3]
gi|499720490	66	51747	1	1	1	1	0.06	hemolysin D [Burkholderia thailandensis]
gi|499720490	79	51747	2	2	1	1	0.06	hemolysin D [Burkholderia thailandensis]
gi|89892397	51	18006	1	1	1	1	0.19	HI0566-like protein [Haemophilus influenzae]
gi|491565568	63	50030	1	1	1	1	0.07	histidine kinase [[Ruminococcus] obeum]
gi|491565568	72	50030	2	2	1	1	0.07	histidine kinase [[Ruminococcus] obeum]
gi|491565568	77	50030	2	2	1	1	0.07	histidine kinase [[Ruminococcus] obeum]
gi|654775616	73	71398	2	2	1	1	0.05	histidine kinase [Burkholderia mimosarum]
gi|500004498	59	49067	1	1	1	1	0.07	histidine kinase [Candidatus Solibacter usitatus]
gi|494780306	59	42995	2	2	1	1	0.08	histidine kinase [Frankia sp. CN3]
gi|494071705	60	47195	1	1	1	1	0.07	histidine kinase [Novosphingobium pentaromativorans]
gi|502775770	61	30475	2	2	1	1	0.11	histidinol phosphatase [Denitrovibrio acetiphilus]
gi|504237556	43	40722	1	1	1	1	0.08	histidinol phosphate aminotransferase [Selenomonas ruminantium]
gi|544874750	53	30315	1	1	1	1	0.11	histidinol-phosphate phosphatase [Sulfurimonas sp. AST-10]
gi|544874750	47	30315	1	1	1	1	0.11	histidinol-phosphate phosphatase [Sulfurimonas sp. AST-10]
gi|512664070	60	44144	1	1	1	1	0.07	histidinol-phosphate phosphatase domain-containing protein [Streptomyces sp. HPH0547]
gi|489379215	55	14391	1	1	1	1	0.24	H-NS histone [Pseudomonas stutzeri]
gi|545445261	72	21487	4	4	1	1	0.34	Holliday junction DNA helicase RuvA [Ruminococcus callidus]
gi|495100241	71	14104	2	2	1	1	0.24	Holliday junction resolvase / Crossover junction endodeoxyribonuclease rusA [Cronobacter sakazakii]
gi|494000354	66	90950	2	2	1	1	0.04	homocysteine methyltransferase [Megasphaera micronuciformis]
gi|494000354	70	90950	2	2	1	1	0.04	homocysteine methyltransferase [Megasphaera micronuciformis]
gi|499454804	50	40004	1	1	1	1	0.08	HrcA family transcriptional regulator [Gloeobacter violaceus]
gi|535709	59	8995	1	1	1	1	0.39	HU protein [Pseudomonas aeruginosa]
gi|664394975	60	106438	1	1	1	1	0.03	hyaluronidase [Streptomyces sp. NRRL B-24720]
gi|498799332	145	27745	4	4	1	1	0.12	hydrolase [Rhodococcus rhodnii]
gi|498799332	148	27745	4	4	1	1	0.12	hydrolase [Rhodococcus rhodnii]
gi|498799332	184	27745	7	7	1	1	0.12	hydrolase [Rhodococcus rhodnii]
gi|500134568	56	29407	1	1	1	1	0.11	hydrolase [Verminephrobacter eiseniae]
gi|489375670	84	78509	3	3	2	2	0.09	hydroperoxidase II [Pseudomonas stutzeri]
gi|515815228	105	78370	2	2	2	2	0.09	hydroperoxidase II [Pseudomonas stutzeri]
gi|500263321	29	29065	1	1	1	1	0.11	hydroxypyruvate isomerase [Pseudomonas stutzeri]
gi|653640660	39	17302	1	1	1	1	0.20	hypothetical protein [[Clostridium] clostridioforme]
gi|493829085	54	6067	2	2	1	1	0.59	hypothetical protein [[Clostridium] hathewayi]
gi|493829085	55	6067	4	4	1	1	0.59	hypothetical protein [[Clostridium] hathewayi]
gi|523697117	55	26591	1	1	1	1	0.13	hypothetical protein [[Clostridium] papyrosolvens]
gi|489595325	63	8981	1	1	1	1	0.39	hypothetical protein [[Clostridium] symbiosum]
gi|491497550	52	7604	1	1	1	1	0.46	hypothetical protein [[Eubacterium] siraeum]
gi|491498812	75	112504	2	2	1	1	0.03	hypothetical protein [[Eubacterium] siraeum]
gi|490982750	42	143412	1	1	1	1	0.02	hypothetical protein [[Ruminococcus] gnavus]
gi|501119077	76	51443	6	6	1	1	0.06	hypothetical protein [Acaryochloris marina]
gi|489720572	75	16675	3	3	1	1	0.20	hypothetical protein [Acetobacter pasteurianus]
gi|502702873	68	15898	2	2	1	1	0.21	hypothetical protein [Acidaminococcus fermentans]
gi|522210125	51	49896	2	2	1	1	0.07	hypothetical protein [Acidobacteriaceae bacterium KBS 96]
gi|522210125	51	49896	3	3	1	1	0.07	hypothetical protein [Acidobacteriaceae bacterium KBS 96]
gi|522210125	46	49896	2	2	1	1	0.07	hypothetical protein [Acidobacteriaceae bacterium KBS 96]
gi|491152452	52	67894	1	1	1	1	0.05	hypothetical protein [Acinetobacter bouvetii]
gi|490958857	357	44282	9	9	5	5	0.54	hypothetical protein [Acinetobacter guillouiae]
gi|490958857	441	44282	13	13	6	6	0.65	hypothetical protein [Acinetobacter guillouiae]
gi|491119964	132	26910	5	5	4	4	0.60	hypothetical protein [Acinetobacter johnsonii]
gi|490834704	63	42656	2	2	2	2	0.16	hypothetical protein [Acinetobacter johnsonii]
gi|490830158	156	14798	2	2	1	1	0.23	hypothetical protein [Acinetobacter johnsonii]
gi|491119964	183	26910	9	9	5	5	1.02	hypothetical protein [Acinetobacter johnsonii]
gi|490830158	201	14798	3	3	1	1	0.23	hypothetical protein [Acinetobacter johnsonii]
gi|490831400	62	11176	1	1	1	1	0.31	hypothetical protein [Acinetobacter johnsonii]
gi|490834704	79	42656	2	2	2	2	0.16	hypothetical protein [Acinetobacter johnsonii]
gi|490830158	133	14798	2	2	1	1	0.23	hypothetical protein [Acinetobacter johnsonii]
gi|491051786	359	44373	9	9	4	4	0.33	hypothetical protein [Acinetobacter junii]
gi|491050669	190	22920	8	8	4	4	0.73	hypothetical protein [Acinetobacter junii]
gi|490814607	63	78315	1	1	1	1	0.04	hypothetical protein [Acinetobacter parvus]
gi|490817238	65	30995	1	1	1	1	0.11	hypothetical protein [Acinetobacter parvus]
gi|491294799	81	34607	2	2	1	1	0.10	hypothetical protein [Acinetobacter sp. ANC 3929]
gi|491294799	76	34607	3	3	1	1	0.10	hypothetical protein [Acinetobacter sp. ANC 3929]
gi|491294799	106	34607	4	4	1	1	0.10	hypothetical protein [Acinetobacter sp. ANC 3929]
gi|490895056	57	14550	1	1	1	1	0.23	hypothetical protein [Acinetobacter sp. CIP 102159]
gi|491320311	30	20361	1	1	1	1	0.17	hypothetical protein [Acinetobacter sp. CIP 53.82]
gi|490912142	73	19242	1	1	1	1	0.18	hypothetical protein [Acinetobacter sp. NIPH 758]
gi|490912142	149	19242	6	6	1	1	0.18	hypothetical protein [Acinetobacter sp. NIPH 758]
gi|490912142	255	19242	10	10	1	1	0.18	hypothetical protein [Acinetobacter sp. NIPH 758]
gi|490922626	170	44276	6	6	5	5	0.43	hypothetical protein [Acinetobacter sp. NIPH 899]
gi|491117354	135	7350	3	3	2	2	1.20	hypothetical protein [Acinetobacter towneri]
gi|491017368	56	70187	1	1	1	1	0.05	hypothetical protein [Acinetobacter venetianus]
gi|517035873	48	77046	1	1	1	1	0.04	hypothetical protein [actinobacterium SCGC AAA278-I18]
gi|517516928	59	65656	1	1	1	1	0.05	hypothetical protein [Actinokineospora enzanensis]
gi|648621885	75	42002	2	2	1	1	0.08	hypothetical protein [Actinomadura flavalba]
gi|517487649	57	58034	1	1	1	1	0.06	hypothetical protein [Actinomadura flavalba]
gi|648621885	68	42002	1	1	1	1	0.08	hypothetical protein [Actinomadura flavalba]
gi|517487649	66	58034	1	1	1	1	0.06	hypothetical protein [Actinomadura flavalba]
gi|648621885	65	42002	1	1	1	1	0.08	hypothetical protein [Actinomadura flavalba]
gi|556604398	55	48633	2	2	1	1	0.07	hypothetical protein [Actinoplanes friuliensis]
gi|556601695	57	38848	1	1	1	1	0.09	hypothetical protein [Actinoplanes friuliensis]
gi|556601695	67	38848	2	2	1	1	0.09	hypothetical protein [Actinoplanes friuliensis]
gi|556604398	51	48633	1	1	1	1	0.07	hypothetical protein [Actinoplanes friuliensis]
gi|556601695	69	38848	2	2	1	1	0.09	hypothetical protein [Actinoplanes friuliensis]
gi|556605621	58	17367	1	1	1	1	0.20	hypothetical protein [Actinoplanes friuliensis]
gi|522062236	62	130547	2	2	1	1	0.03	hypothetical protein [Actinopolymorpha alba]
gi|648460162	102	10494	2	2	1	1	0.33	hypothetical protein [Actinopolyspora halophila]
gi|648460162	92	10494	1	1	1	1	0.33	hypothetical protein [Actinopolyspora halophila]
gi|648460162	68	10494	1	1	1	1	0.33	hypothetical protein [Actinopolyspora halophila]
gi|506285795	64	17768	1	1	1	1	0.19	hypothetical protein [Actinosynnema mirum]
gi|506285795	61	17768	2	2	1	1	0.19	hypothetical protein [Actinosynnema mirum]
gi|506285795	93	17768	3	3	1	1	0.19	hypothetical protein [Actinosynnema mirum]
gi|488801473	62	153587	1	1	1	1	0.02	hypothetical protein [Afipia clevelandensis]
gi|517519973	62	14417	2	2	1	1	0.24	hypothetical protein [Ahrensia kielensis]
gi|493493024	52	43368	1	1	1	1	0.08	hypothetical protein [Alicyclobacillus hesperidum]
gi|490457299	51	63673	1	1	1	1	0.05	hypothetical protein [Alistipes putredinis]
gi|499949151	63	18472	1	1	1	1	0.18	hypothetical protein [Alkalilimnicola ehrlichii]
gi|499949151	55	18472	1	1	1	1	0.18	hypothetical protein [Alkalilimnicola ehrlichii]
gi|516069562	61	24452	1	1	1	1	0.14	hypothetical protein [alpha proteobacterium LLX12A]
gi|518865437	60	30282	1	1	1	1	0.11	hypothetical protein [alpha proteobacterium SCGC AAA536-G10]
gi|640206690	74	40907	2	2	1	1	0.08	hypothetical protein [Aminobacterium mobile]
gi|640206690	88	40907	2	2	1	1	0.08	hypothetical protein [Aminobacterium mobile]
gi|640206690	105	40907	3	3	1	1	0.08	hypothetical protein [Aminobacterium mobile]
gi|522123445	60	143435	1	1	1	1	0.02	hypothetical protein [Amycolatopsis alba]
gi|491308733	62	175628	1	1	1	1	0.02	hypothetical protein [Amycolatopsis azurea]
gi|491296441	58	50999	1	1	1	1	0.06	hypothetical protein [Amycolatopsis azurea]
gi|522155496	80	26627	2	2	1	1	0.13	hypothetical protein [Amycolatopsis nigrescens]
gi|522158907	66	34009	1	1	1	1	0.10	hypothetical protein [Amycolatopsis nigrescens]
gi|522155496	61	26627	1	1	1	1	0.13	hypothetical protein [Amycolatopsis nigrescens]
gi|522158907	58	34009	2	2	1	1	0.10	hypothetical protein [Amycolatopsis nigrescens]
gi|654475295	71	31551	1	1	1	1	0.11	hypothetical protein [Amycolatopsis taiwanensis]
gi|503572484	54	63034	1	1	1	1	0.05	hypothetical protein [Amycolicicoccus subflavus]
gi|500744359	55	135381	1	1	1	1	0.02	hypothetical protein [Anaeromyxobacter sp. Fw109-5]
gi|500744359	53	135381	1	1	1	1	0.02	hypothetical protein [Anaeromyxobacter sp. Fw109-5]
gi|500744359	64	135381	1	1	1	1	0.02	hypothetical protein [Anaeromyxobacter sp. Fw109-5]
gi|511073821	65	20774	2	2	1	1	0.16	hypothetical protein [Anaerotruncus sp. G3(2012)]
gi|511073821	61	20774	1	1	1	1	0.16	hypothetical protein [Anaerotruncus sp. G3(2012)]
gi|499182873	60	47951	1	1	1	1	0.07	hypothetical protein [Aquifex aeolicus]
gi|499182873	74	47951	1	1	1	1	0.07	hypothetical protein [Aquifex aeolicus]
gi|499182873	97	47951	3	3	1	1	0.07	hypothetical protein [Aquifex aeolicus]
gi|490645887	51	37117	1	1	1	1	0.09	hypothetical protein [Arcobacter butzleri]
gi|490645887	56	37117	1	1	1	1	0.09	hypothetical protein [Arcobacter butzleri]
gi|490645887	56	37117	7	7	1	1	0.09	hypothetical protein [Arcobacter butzleri]
gi|518311698	53	14857	1	1	1	1	0.23	hypothetical protein [Arthrobacter sp. TB 23]
gi|518311698	101	14857	3	3	1	1	0.23	hypothetical protein [Arthrobacter sp. TB 23]
gi|518311698	84	14857	2	2	1	1	0.23	hypothetical protein [Arthrobacter sp. TB 23]
gi|505248060	52	78114	1	1	1	1	0.04	hypothetical protein [Azoarcus sp. KH32C]
gi|655958442	59	62236	1	1	1	1	0.05	hypothetical protein [Azohydromonas australica]
gi|655965421	42	16755	1	1	1	1	0.20	hypothetical protein [Azospirillum halopraeferens]
gi|446365392	102	7521	3	3	1	1	0.47	hypothetical protein [Bacillus cereus]
gi|488066451	79	15336	2	2	1	1	0.22	hypothetical protein [Bacillus cereus]
gi|446267296	56	20487	1	1	1	1	0.16	hypothetical protein [Bacillus cereus]
gi|446276728	52	27039	1	1	1	1	0.12	hypothetical protein [Bacillus cereus]
gi|446311607	53	232442	1	1	1	1	0.01	hypothetical protein [Bacillus cereus]
gi|446276728	59	27039	3	3	1	1	0.12	hypothetical protein [Bacillus cereus]
gi|446267296	61	20487	1	1	1	1	0.16	hypothetical protein [Bacillus cereus]
gi|488066451	100	15336	3	3	1	1	0.22	hypothetical protein [Bacillus cereus]
gi|446365392	89	7521	2	2	1	1	0.47	hypothetical protein [Bacillus cereus]
gi|446276728	65	27039	4	4	1	1	0.12	hypothetical protein [Bacillus cereus]
gi|507021937	64	38473	1	1	1	1	0.09	hypothetical protein [Bacillus cereus]
gi|518223765	56	73567	1	1	1	1	0.04	hypothetical protein [Bacillus endophyticus]
gi|518223765	57	73567	1	1	1	1	0.04	hypothetical protein [Bacillus endophyticus]
gi|640597443	64	38100	1	1	1	1	0.09	hypothetical protein [Bacillus mannanilyticus]
gi|640597443	55	38100	1	1	1	1	0.09	hypothetical protein [Bacillus mannanilyticus]
gi|490568648	51	25301	1	1	1	1	0.13	hypothetical protein [Bacillus methanolicus]
gi|490568648	55	25301	1	1	1	1	0.13	hypothetical protein [Bacillus methanolicus]
gi|505406913	60	39294	1	1	1	1	0.08	hypothetical protein [Bacillus sp. 1NLA3E]
gi|505406913	59	39294	1	1	1	1	0.08	hypothetical protein [Bacillus sp. 1NLA3E]
gi|495417578	58	61005	1	1	1	1	0.05	hypothetical protein [Bacteroides coprophilus]
gi|492365381	73	9698	1	1	1	1	0.36	hypothetical protein [Bacteroides fragilis]
gi|488623873	58	74602	1	1	1	1	0.04	hypothetical protein [Bacteroides sp. HPS0048]
gi|494112904	61	5325	1	1	1	1	0.68	hypothetical protein [Bifidobacterium longum]
gi|551237114	77	137533	1	1	1	1	0.02	hypothetical protein [Bifidobacterium pseudolongum]
gi|518781969	53	40656	1	1	1	1	0.08	hypothetical protein [Bordetella sp. FB-8]
gi|517477453	26	91512	1	1	1	1	0.04	hypothetical protein [Bradyrhizobium japonicum]
gi|489486501	66	14963	4	4	1	1	0.23	hypothetical protein [Brevibacillus borstelensis]
gi|489486501	62	14963	3	3	1	1	0.23	hypothetical protein [Brevibacillus borstelensis]
gi|489486501	59	14963	2	2	1	1	0.23	hypothetical protein [Brevibacillus borstelensis]
gi|647376807	63	12680	1	1	1	1	0.27	hypothetical protein [Brevibacterium sp. VCM10]
gi|489256187	79	36875	2	2	1	1	0.09	hypothetical protein [Brevundimonas diminuta]
gi|489256187	54	36875	1	1	1	1	0.09	hypothetical protein [Brevundimonas diminuta]
gi|489256187	131	36875	6	6	1	1	0.09	hypothetical protein [Brevundimonas diminuta]
gi|656057257	63	33377	1	1	1	1	0.10	hypothetical protein [Budvicia aquatica]
gi|656057257	67	33377	1	1	1	1	0.10	hypothetical protein [Budvicia aquatica]
gi|654280026	40	22493	1	1	1	1	0.15	hypothetical protein [Burkholderia acidipaludis]
gi|493814665	56	46122	1	1	1	1	0.07	hypothetical protein [Burkholderia ambifaria]
gi|493806942	59	29172	3	3	1	1	0.11	hypothetical protein [Burkholderia ambifaria]
gi|493814665	61	46122	1	1	1	1	0.07	hypothetical protein [Burkholderia ambifaria]
gi|499671208	55	37906	1	1	1	1	0.09	hypothetical protein [Burkholderia lata]
gi|501372608	68	13813	2	2	1	1	0.25	hypothetical protein [Burkholderia phymatum]
gi|501372608	76	13813	2	2	1	1	0.25	hypothetical protein [Burkholderia phymatum]
gi|501372608	62	13813	1	1	1	1	0.25	hypothetical protein [Burkholderia phymatum]
gi|517251272	59	57642	1	1	1	1	0.06	hypothetical protein [Burkholderia sp. JPY347]
gi|551035716	105	28192	3	3	1	1	0.12	hypothetical protein [Butyrivibrio sp. AE3009]
gi|551035716	121	28192	4	4	1	1	0.12	hypothetical protein [Butyrivibrio sp. AE3009]
gi|640334386	37	49429	1	1	1	1	0.07	hypothetical protein [Butyrivibrio sp. FCS014]
gi|647307387	60	68388	2	2	1	1	0.05	hypothetical protein [Caldicoprobacter oshimai]
gi|647307387	55	68388	1	1	1	1	0.05	hypothetical protein [Caldicoprobacter oshimai]
gi|504244778	66	49355	1	1	1	1	0.07	hypothetical protein [Caldilinea aerophila]
gi|518318285	56	58273	3	3	1	1	0.06	hypothetical protein [Calothrix sp. PCC 7103]
gi|518318285	53	58273	1	1	1	1	0.06	hypothetical protein [Calothrix sp. PCC 7103]
gi|518318285	53	58273	2	2	1	1	0.06	hypothetical protein [Calothrix sp. PCC 7103]
gi|557308536	169	20716	12	12	1	1	0.35	hypothetical protein [Campylobacter fetus]
gi|557308536	113	20716	7	7	1	1	0.16	hypothetical protein [Campylobacter fetus]
gi|557308536	163	20716	13	13	1	1	0.16	hypothetical protein [Campylobacter fetus]
gi|551165596	55	56774	3	3	1	1	0.06	hypothetical protein [Candidatus Latescibacter anaerobius]
gi|551165596	44	56774	1	1	1	1	0.06	hypothetical protein [Candidatus Latescibacter anaerobius]
gi|551165596	44	56774	3	3	1	1	0.06	hypothetical protein [Candidatus Latescibacter anaerobius]
gi|503013229	50	21094	1	1	1	1	0.16	hypothetical protein [Candidatus Nitrospira defluvii]
gi|512709207	63	165910	2	2	1	1	0.02	hypothetical protein [Capnocytophaga sp. oral taxon 336]
gi|655002401	54	46738	1	1	1	1	0.07	hypothetical protein [Chitinilyticum aquatile]
gi|655006959	69	87011	1	1	1	1	0.04	hypothetical protein [Chitinilyticum litopenaei]
gi|655006959	105	87011	4	4	1	1	0.04	hypothetical protein [Chitinilyticum litopenaei]
gi|654998264	56	59947	1	1	1	1	0.05	hypothetical protein [Chitinimonas koreensis]
gi|654998264	53	59947	1	1	1	1	0.05	hypothetical protein [Chitinimonas koreensis]
gi|499447455	59	45335	1	1	1	1	0.07	hypothetical protein [Chromobacterium violaceum]
gi|494036354	79	15624	2	2	1	1	0.22	hypothetical protein [Chthoniobacter flavus]
gi|545414405	59	25002	1	1	1	1	0.13	hypothetical protein [Clostridiales bacterium oral taxon 876]
gi|639745987	85	72419	1	1	1	1	0.05	hypothetical protein [Clostridiales bacterium VE202-14]
gi|639745987	89	72419	1	1	1	1	0.05	hypothetical protein [Clostridiales bacterium VE202-14]
gi|488644745	56	73213	1	1	1	1	0.04	hypothetical protein [Clostridium butyricum]
gi|488644745	59	73213	1	1	1	1	0.04	hypothetical protein [Clostridium butyricum]
gi|488646024	51	45459	1	1	1	1	0.07	hypothetical protein [Clostridium butyricum]
gi|496653768	61	41912	1	1	1	1	0.08	hypothetical protein [Clostridium sp. 7_3_54FAA]
gi|515984408	71	60763	2	2	1	1	0.05	hypothetical protein [Clostridium tunisiense]
gi|515984408	87	60763	5	5	1	1	0.05	hypothetical protein [Clostridium tunisiense]
gi|652637293	48	63202	1	1	1	1	0.05	hypothetical protein [Conexibacter woesei]
gi|490987454	58	16558	1	1	1	1	0.20	hypothetical protein [Coprococcus eutactus]
gi|490987454	63	16558	2	2	1	1	0.20	hypothetical protein [Coprococcus eutactus]
gi|491537626	57	132550	1	1	1	1	0.02	hypothetical protein [Corynebacterium glucuronolyticum]
gi|517409133	56	322238	2	2	1	1	0.01	hypothetical protein [Corynebacterium pilosum]
gi|517409133	55	322238	3	3	1	1	0.01	hypothetical protein [Corynebacterium pilosum]
gi|517409133	54	322238	2	2	1	1	0.01	hypothetical protein [Corynebacterium pilosum]
gi|512462420	57	40112	1	1	1	1	0.08	hypothetical protein [Corynebacterium sp. HFH0082]
gi|512462420	67	40112	2	2	1	1	0.08	hypothetical protein [Corynebacterium sp. HFH0082]
gi|494514157	58	41294	1	1	1	1	0.08	hypothetical protein [Crocosphaera watsonii]
gi|495551762	64	9663	1	1	1	1	0.36	hypothetical protein [Cyanothece sp. CCY0110]
gi|495551762	63	9663	1	1	1	1	0.36	hypothetical protein [Cyanothece sp. CCY0110]
gi|495551762	76	9663	2	2	1	1	0.36	hypothetical protein [Cyanothece sp. CCY0110]
gi|493318910	60	32369	1	1	1	1	0.10	hypothetical protein [Cylindrospermopsis raciborskii]
gi|653253311	73	74347	3	3	1	1	0.04	hypothetical protein [Dechloromonas agitata]
gi|518418197	36	112719	1	1	1	1	0.03	hypothetical protein [Deinococcus apachensis]
gi|501161795	64	13531	2	2	1	1	0.25	hypothetical protein [Delftia acidovorans]
gi|522075771	267	11889	5	5	1	1	0.29	hypothetical protein [Desulfobacter curvatus]
gi|522075771	206	11889	4	4	1	1	0.29	hypothetical protein [Desulfobacter curvatus]
gi|522075771	322	11889	8	8	1	1	0.29	hypothetical protein [Desulfobacter curvatus]
gi|655137457	45	63057	1	1	1	1	0.05	hypothetical protein [Desulfobulbus mediterraneus]
gi|503952839	58	35991	1	1	1	1	0.09	hypothetical protein [Desulfosporosinus orientis]
gi|503952839	60	35991	1	1	1	1	0.09	hypothetical protein [Desulfosporosinus orientis]
gi|492831789	57	7555	1	1	1	1	0.47	hypothetical protein [Desulfovibrio africanus]
gi|550909242	65	50929	1	1	1	1	0.06	hypothetical protein [Desulfovibrio longus]
gi|550909242	63	50929	2	2	1	1	0.06	hypothetical protein [Desulfovibrio longus]
gi|550909242	57	50929	1	1	1	1	0.06	hypothetical protein [Desulfovibrio longus]
gi|516839060	59	39523	1	1	1	1	0.08	hypothetical protein [Desulfovibrio oxyclinae]
gi|652936326	65	22538	1	1	1	1	0.15	hypothetical protein [Desulfovibrio putealis]
gi|652936326	81	22538	4	4	1	1	0.15	hypothetical protein [Desulfovibrio putealis]
gi|503403699	59	29055	1	1	1	1	0.11	hypothetical protein [Desulfurobacterium thermolithotrophum]
gi|518682176	57	7567	1	1	1	1	0.47	hypothetical protein [Dickeya zeae]
gi|490774638	64	32298	2	2	1	1	0.10	hypothetical protein [Dolosigranulum pigrum]
gi|491477066	85	83249	2	2	1	1	0.04	hypothetical protein [Dorea formicigenerans]
gi|491477066	73	83249	2	2	1	1	0.04	hypothetical protein [Dorea formicigenerans]
gi|517287132	67	24836	1	1	1	1	0.13	hypothetical protein [Echinicola pacifica]
gi|517287132	93	24836	3	3	1	1	0.13	hypothetical protein [Echinicola pacifica]
gi|517287132	94	24836	3	3	1	1	0.13	hypothetical protein [Echinicola pacifica]
gi|517843409	56	40311	1	1	1	1	0.08	hypothetical protein [Elioraea tepidiphila]
gi|517845851	220	36975	5	5	3	3	0.41	hypothetical protein [Elioraea tepidiphila]
gi|504840397	58	67391	1	1	1	1	0.05	hypothetical protein [Emticicia oligotrophica]
gi|504840397	84	67391	5	5	1	1	0.05	hypothetical protein [Emticicia oligotrophica]
gi|510931574	60	20512	1	1	1	1	0.16	hypothetical protein [Enterococcus cecorum]
gi|510931574	59	20512	1	1	1	1	0.16	hypothetical protein [Enterococcus cecorum]
gi|488284969	66	12526	1	1	1	1	0.27	hypothetical protein [Enterococcus faecalis]
gi|488284969	65	12526	3	3	1	1	0.27	hypothetical protein [Enterococcus faecalis]
gi|498450534	271	15547	12	12	1	1	0.22	hypothetical protein [Enterococcus pallens]
gi|498450534	217	15547	11	11	1	1	0.22	hypothetical protein [Enterococcus pallens]
gi|498450534	208	15547	9	9	1	1	0.22	hypothetical protein [Enterococcus pallens]
gi|648243566	63	16521	1	1	1	1	0.20	hypothetical protein [Enterovibrio calviensis]
gi|496003687	67	12699	2	2	1	1	0.27	hypothetical protein [Erysipelotrichaceae bacterium 2_2_44A]
gi|446372861	64	27849	1	1	1	1	0.12	hypothetical protein [Escherichia coli]
gi|496585197	58	22930	2	2	1	1	0.15	hypothetical protein [Fibrisoma limi]
gi|496143652	55	10760	1	1	1	1	0.32	hypothetical protein [Flavobacteria bacterium MS024-3C]
gi|652630199	76	46277	2	2	1	1	0.07	hypothetical protein [Flexibacter roseolus]
gi|652630199	67	46277	1	1	1	1	0.07	hypothetical protein [Flexibacter roseolus]
gi|494922284	55	71111	1	1	1	1	0.05	hypothetical protein [Formosa sp. AK20]
gi|503186816	61	43574	1	1	1	1	0.08	hypothetical protein [Frankia sp. EuI1c]
gi|492768604	48	145919	1	1	1	1	0.02	hypothetical protein [Fusobacterium necrophorum]
gi|492820374	77	49532	1	1	1	1	0.07	hypothetical protein [Fusobacterium ulcerans]
gi|492820374	55	49532	1	1	1	1	0.07	hypothetical protein [Fusobacterium ulcerans]
gi|492747787	66	13478	1	1	1	1	0.25	hypothetical protein [Fusobacterium varium]
gi|497355519	56	27673	1	1	1	1	0.12	hypothetical protein [gamma proteobacterium IMCC1989]
gi|501981140	53	23689	1	1	1	1	0.14	hypothetical protein [Gemmatimonas aurantiaca]
gi|500473160	119	33344	3	3	1	1	0.10	hypothetical protein [Geobacter uraniireducens]
gi|500473160	77	33344	2	2	1	1	0.10	hypothetical protein [Geobacter uraniireducens]
gi|500473160	83	33344	2	2	1	1	0.10	hypothetical protein [Geobacter uraniireducens]
gi|501181520	66	40923	1	1	1	1	0.08	hypothetical protein [Gluconacetobacter diazotrophicus]
gi|497366502	57	53755	1	1	1	1	0.06	hypothetical protein [Gordonia neofelifaecis]
gi|497366502	54	53755	1	1	1	1	0.06	hypothetical protein [Gordonia neofelifaecis]
gi|494173456	44	15211	1	1	1	1	0.22	hypothetical protein [Halomonas boliviensis]
gi|446827896	58	43108	1	1	1	1	0.08	hypothetical protein [Helicobacter pylori]
gi|516023977	106	42222	1	1	1	1	0.08	hypothetical protein [Herbaspirillum seropedicae]
gi|517238679	50	37380	1	1	1	1	0.09	hypothetical protein [Hoeflea sp. 108]
gi|518790297	56	30423	1	1	1	1	0.11	hypothetical protein [Hymenobacter aerophilus]
gi|518790297	57	30423	2	2	1	1	0.11	hypothetical protein [Hymenobacter aerophilus]
gi|502979774	81	51267	1	1	1	1	0.06	hypothetical protein [Hyphomicrobium denitrificans]
gi|502979774	66	51267	1	1	1	1	0.06	hypothetical protein [Hyphomicrobium denitrificans]
gi|648404741	58	41841	1	1	1	1	0.08	hypothetical protein [Ideonella sp. B508-1]
gi|494497197	66	31919	2	2	1	1	0.10	hypothetical protein [Intestinibacter bartlettii]
gi|494497197	68	31919	2	2	1	1	0.10	hypothetical protein [Intestinibacter bartlettii]
gi|516486364	52	43363	1	1	1	1	0.08	hypothetical protein [Janthinobacterium sp. CG3]
gi|516955116	62	27285	1	1	1	1	0.12	hypothetical protein [Kaistia granuli]
gi|517452486	59	36471	1	1	1	1	0.09	hypothetical protein [Kangiella aquimarina]
gi|490254920	59	109156	1	1	1	1	0.03	hypothetical protein [Klebsiella pneumoniae]
gi|490254920	62	109156	1	1	1	1	0.03	hypothetical protein [Klebsiella pneumoniae]
gi|495197425	57	32130	1	1	1	1	0.10	hypothetical protein [Ktedonobacter racemifer]
gi|644684270	67	52411	1	1	1	1	0.06	hypothetical protein [Kutzneria albida]
gi|644684270	93	52411	5	5	1	1	0.06	hypothetical protein [Kutzneria albida]
gi|496566704	91	22886	3	3	1	1	0.15	hypothetical protein [Lachnospiraceae bacterium 1_4_56FAA]
gi|496566704	66	22886	1	1	1	1	0.15	hypothetical protein [Lachnospiraceae bacterium 1_4_56FAA]
gi|496566704	69	22886	3	3	1	1	0.31	hypothetical protein [Lachnospiraceae bacterium 1_4_56FAA]
gi|511034208	68	37489	1	1	1	1	0.09	hypothetical protein [Lachnospiraceae bacterium 3-1]
gi|652834788	60	39455	2	2	1	1	0.08	hypothetical protein [Lachnospiraceae bacterium YSB2008]
gi|489668159	53	42666	1	1	1	1	0.08	hypothetical protein [Lactobacillus casei]
gi|640585062	34	218034	1	1	1	1	0.01	hypothetical protein [Lactobacillus kitasatonis]
gi|489811799	60	24252	1	1	1	1	0.14	hypothetical protein [Lactobacillus oris]
gi|491919210	83	55351	4	4	1	1	0.06	hypothetical protein [Lautropia mirabilis]
gi|491919210	73	55351	2	2	1	1	0.06	hypothetical protein [Lautropia mirabilis]
gi|491919210	104	55351	6	6	1	1	0.06	hypothetical protein [Lautropia mirabilis]
gi|493924487	37	34564	1	1	1	1	0.10	hypothetical protein [Legionella drancourtii]
gi|652981354	90	24098	4	4	1	1	0.30	hypothetical protein [Leisingera caerulea]
gi|652981354	58	24098	1	1	1	1	0.14	hypothetical protein [Leisingera caerulea]
gi|652981354	74	24098	3	3	2	2	0.48	hypothetical protein [Leisingera caerulea]
gi|515856382	61	63809	1	1	1	1	0.05	hypothetical protein [Leptolyngbya boryana]
gi|523638052	110	131390	3	3	1	1	0.02	hypothetical protein [Leptospira alstoni]
gi|523638052	109	131390	3	3	1	1	0.02	hypothetical protein [Leptospira alstoni]
gi|523638052	91	131390	2	2	1	1	0.02	hypothetical protein [Leptospira alstoni]
gi|495867285	51	27680	1	1	1	1	0.12	hypothetical protein [Leptospira licerasiae]
gi|489094931	47	59266	1	1	1	1	0.06	hypothetical protein [Leptospira weilii]
gi|493858857	41	7834	1	1	1	1	0.45	hypothetical protein [Leptotrichia hofstadii]
gi|516404779	72	38246	4	4	1	1	0.09	hypothetical protein [Leucobacter salsicius]
gi|522027069	44	38701	1	1	1	1	0.09	hypothetical protein [Lewinella cohaerens]
gi|522024204	51	14712	1	1	1	1	0.23	hypothetical protein [Lewinella cohaerens]
gi|545457148	58	25274	1	1	1	1	0.13	hypothetical protein [Loktanella cinnabarina]
gi|496310103	59	35244	1	1	1	1	0.09	hypothetical protein [Luminiphilus syltensis]
gi|653079944	54	41640	1	1	1	1	0.08	hypothetical protein [Marinimicrobium agarilyticum]
gi|653079944	58	41640	2	2	1	1	0.08	hypothetical protein [Marinimicrobium agarilyticum]
gi|653079944	74	41640	2	2	1	1	0.08	hypothetical protein [Marinimicrobium agarilyticum]
gi|504061941	65	54300	2	2	1	1	0.06	hypothetical protein [Marinitoga piezophila]
gi|504061941	58	54300	1	1	1	1	0.06	hypothetical protein [Marinitoga piezophila]
gi|504061941	54	54300	1	1	1	1	0.06	hypothetical protein [Marinitoga piezophila]
gi|496226193	70	32058	5	5	1	1	0.10	hypothetical protein [Marinobacter santoriniensis]
gi|496226193	62	32058	2	2	1	1	0.10	hypothetical protein [Marinobacter santoriniensis]
gi|522175098	80	36581	2	2	2	2	0.19	hypothetical protein [Marinobacterium rhizophilum]
gi|491905444	57	58814	1	1	1	1	0.06	hypothetical protein [Massilia timonae]
gi|518696273	68	50071	1	1	1	1	0.07	hypothetical protein [Mesorhizobium loti]
gi|563869628	70	6599	4	4	1	1	0.55	hypothetical protein [Mesorhizobium sp. L2C089B000]
gi|563869628	61	6599	2	2	1	1	0.55	hypothetical protein [Mesorhizobium sp. L2C089B000]
gi|563543281	53	9988	1	1	1	1	0.35	hypothetical protein [Mesorhizobium sp. LNJC386A00]
gi|517072874	65	24537	1	1	1	1	0.14	hypothetical protein [Methylobacterium sp. WSM2598]
gi|517218951	62	32997	1	1	1	1	0.10	hypothetical protein [Methylocystis rosea]
gi|517218951	82	32997	2	2	1	1	0.10	hypothetical protein [Methylocystis rosea]
gi|517218951	61	32997	1	1	1	1	0.10	hypothetical protein [Methylocystis rosea]
gi|551328730	67	52939	3	3	1	1	0.06	hypothetical protein [Methylohalobius crimeensis]
gi|503913073	61	26253	1	1	1	1	0.13	hypothetical protein [Methylomicrobium alcaliphilum]
gi|495382933	67	77897	1	1	1	1	0.04	hypothetical protein [Methylophilales bacterium HTCC2181]
gi|522050324	66	106889	2	2	1	1	0.03	hypothetical protein [Methylosarcina fibrata]
gi|522050324	77	106889	4	4	1	1	0.03	hypothetical protein [Methylosarcina fibrata]
gi|522050324	69	106889	3	3	1	1	0.03	hypothetical protein [Methylosarcina fibrata]
gi|495340165	81	53761	1	1	1	1	0.06	hypothetical protein [Methyloversatilis universalis]
gi|519009729	85	54035	1	1	1	1	0.06	hypothetical protein [Methyloversatilis universalis]
gi|519008835	63	82365	1	1	1	1	0.04	hypothetical protein [Methyloversatilis universalis]
gi|495340165	47	53761	1	1	1	1	0.06	hypothetical protein [Methyloversatilis universalis]
gi|518703984	233	56071	6	6	3	3	0.19	hypothetical protein [Methylovulum miyakonense]
gi|518703984	337	56071	11	11	3	3	0.41	hypothetical protein [Methylovulum miyakonense]
gi|493683701	58	9528	1	1	1	1	0.36	hypothetical protein [Microcoleus vaginatus]
gi|489977145	82	18027	6	6	1	1	0.19	hypothetical protein [Mycobacterium fortuitum]
gi|489978012	71	11960	1	1	1	1	0.29	hypothetical protein [Mycobacterium fortuitum]
gi|489977145	83	18027	4	4	1	1	0.19	hypothetical protein [Mycobacterium fortuitum]
gi|489977145	77	18027	6	6	1	1	0.19	hypothetical protein [Mycobacterium fortuitum]
gi|489980977	34	29943	1	1	1	1	0.11	hypothetical protein [Mycobacterium fortuitum]
gi|493285227	56	25608	1	1	1	1	0.13	hypothetical protein [Mycobacterium tusciae]
gi|493285227	72	25608	1	1	1	1	0.13	hypothetical protein [Mycobacterium tusciae]
gi|490933250	62	188840	1	1	1	1	0.02	hypothetical protein [Mycoplasma canis]
gi|490933250	63	188840	3	3	1	1	0.02	hypothetical protein [Mycoplasma canis]
gi|659858372	60	96414	2	2	1	1	0.03	hypothetical protein [Mycoplasma opalescens]
gi|659858372	63	96414	3	3	1	1	0.03	hypothetical protein [Mycoplasma opalescens]
gi|659858372	71	96414	3	3	1	1	0.03	hypothetical protein [Mycoplasma opalescens]
gi|488711008	59	10198	1	1	1	1	0.34	hypothetical protein [Myxococcus sp. (contaminant ex DSM 436)]
gi|505163229	55	77428	1	1	1	1	0.04	hypothetical protein [Myxococcus stipitatus]
gi|655020072	71	67709	1	1	1	1	0.05	hypothetical protein [Neptunomonas japonica]
gi|551357468	58	87999	3	3	2	2	0.08	hypothetical protein [Nevskia ramosa]
gi|517457994	59	54375	1	1	1	1	0.06	hypothetical protein [Niabella aurantiaca]
gi|503319415	39	30824	1	1	1	1	0.11	hypothetical protein [Nitratifractor salsuginis]
gi|495750607	55	54879	1	1	1	1	0.06	hypothetical protein [Nitrolancea hollandica]
gi|502799572	73	67181	4	4	1	1	0.05	hypothetical protein [Nitrosococcus halophilus]
gi|502799572	57	67181	1	1	1	1	0.05	hypothetical protein [Nitrosococcus halophilus]
gi|490285264	174	50128	2	2	1	1	0.07	hypothetical protein [Nitrosospira sp. APG3]
gi|490285264	111	50128	1	1	1	1	0.07	hypothetical protein [Nitrosospira sp. APG3]
gi|663749412	58	38989	1	1	1	1	0.08	hypothetical protein [Nocardia rhamnosiphila]
gi|663744035	45	47276	1	1	1	1	0.07	hypothetical protein [Nocardia rhamnosiphila]
gi|504721383	57	13280	1	1	1	1	0.26	hypothetical protein [Nocardiopsis alba]
gi|516213261	81	20582	1	1	1	1	0.16	hypothetical protein [Nocardiopsis gilva]
gi|516108514	70	51701	2	2	1	1	0.06	hypothetical protein [Nocardiopsis halophila]
gi|544817660	58	104781	1	1	1	1	0.03	hypothetical protein [Novosphingobium lindaniclasticum]
gi|544817660	93	104781	3	3	2	2	0.06	hypothetical protein [Novosphingobium lindaniclasticum]
gi|655247236	67	104855	2	2	1	1	0.03	hypothetical protein [Novosphingobium sp. B-7]
gi|504963531	66	40855	1	1	1	1	0.08	hypothetical protein [Oscillatoria acuminata]
gi|516328559	52	40051	2	2	1	1	0.08	hypothetical protein [Oscillatoria sp. PCC 10802]
gi|516328559	63	40051	4	4	1	1	0.08	hypothetical protein [Oscillatoria sp. PCC 10802]
gi|647567468	48	43363	1	1	1	1	0.08	hypothetical protein [Paenibacillus ehimensis]
gi|518362671	48	27222	1	1	1	1	0.12	hypothetical protein [Paenibacillus ginsengihumi]
gi|648240153	57	35026	1	1	1	1	0.09	hypothetical protein [Paenibacillus senegalensis]
gi|565884916	29	17053	1	1	1	1	0.20	hypothetical protein [Paenibacillus sp. JCM 10914]
gi|655105284	57	49373	1	1	1	1	0.07	hypothetical protein [Paenibacillus sp. UNC451MF]
gi|502570745	53	9852	1	1	1	1	0.35	hypothetical protein [Paenibacillus sp. Y412MC10]
gi|545154596	64	13560	2	2	1	1	0.25	hypothetical protein [Pantoea dispersa]
gi|544757135	58	54006	2	2	1	1	0.06	hypothetical protein [Pantoea sp. AS-PWVM4]
gi|544757135	62	54006	1	1	1	1	0.06	hypothetical protein [Pantoea sp. AS-PWVM4]
gi|544757135	52	54006	1	1	1	1	0.06	hypothetical protein [Pantoea sp. AS-PWVM4]
gi|517168340	71	59042	2	2	1	1	0.06	hypothetical protein [Pasteurella pneumotropica]
gi|652518689	59	54202	2	2	1	1	0.06	hypothetical protein [Patulibacter minatonensis]
gi|491136569	48	163586	1	1	1	1	0.02	hypothetical protein [Peanut witches'-broom phytoplasma]
gi|491136569	51	163586	1	1	1	1	0.02	hypothetical protein [Peanut witches'-broom phytoplasma]
gi|656258027	71	32848	1	1	1	1	0.10	hypothetical protein [Pedobacter agri]
gi|550428847	52	14814	1	1	1	1	0.23	hypothetical protein [Peptoclostridium difficile]
gi|488813955	63	48515	3	3	1	1	0.07	hypothetical protein [Phaeospirillum molischianum]
gi|488813955	57	48515	1	1	1	1	0.07	hypothetical protein [Phaeospirillum molischianum]
gi|488813955	63	48515	2	2	1	1	0.07	hypothetical protein [Phaeospirillum molischianum]
gi|499457202	58	28606	1	1	1	1	0.12	hypothetical protein [Photorhabdus luminescens]
gi|499457202	64	28606	2	2	1	1	0.12	hypothetical protein [Photorhabdus luminescens]
gi|502674860	57	17803	2	2	1	1	0.19	hypothetical protein [Pirellula staleyi]
gi|488726103	56	54323	16	16	1	1	0.06	hypothetical protein [Planctomyces maris]
gi|488726103	50	54323	5	5	1	1	0.06	hypothetical protein [Planctomyces maris]
gi|493884666	65	36365	1	1	1	1	0.09	hypothetical protein [Planococcus antarcticus]
gi|494027904	61	56418	1	1	1	1	0.06	hypothetical protein [Plesiocystis pacifica]
gi|505295023	57	7834	1	1	1	1	0.45	hypothetical protein [Polaribacter sp. MED152]
gi|505295023	60	7834	2	2	1	1	0.45	hypothetical protein [Polaribacter sp. MED152]
gi|494932443	63	26445	4	4	1	1	0.27	hypothetical protein [Pontibacter sp. BAB1700]
gi|494932443	58	26445	3	3	1	1	0.13	hypothetical protein [Pontibacter sp. BAB1700]
gi|494932443	61	26445	3	3	1	1	0.13	hypothetical protein [Pontibacter sp. BAB1700]
gi|490721453	62	60970	3	3	1	1	0.11	hypothetical protein [Porphyromonas gingivalis]
gi|490721453	70	60970	3	3	1	1	0.11	hypothetical protein [Porphyromonas gingivalis]
gi|490721453	61	60970	2	2	1	1	0.05	hypothetical protein [Porphyromonas gingivalis]
gi|517794586	59	17113	1	1	1	1	0.20	hypothetical protein [Porphyromonas gulae]
gi|493902235	52	6431	1	1	1	1	0.56	hypothetical protein [Prevotella copri]
gi|640651886	43	20030	1	1	1	1	0.17	hypothetical protein [Prevotella fusca]
gi|494006852	58	36111	1	1	1	1	0.09	hypothetical protein [Prevotella marshii]
gi|503030573	62	13427	2	2	1	1	0.25	hypothetical protein [Prevotella melaninogenica]
gi|659854831	56	17293	1	1	1	1	0.20	hypothetical protein [Prevotella sp. 10(H)]
gi|655448457	65	16364	3	3	1	1	0.21	hypothetical protein [Proteobacteria bacterium JGI 0000113-E04]
gi|493709213	68	84174	2	2	1	1	0.04	hypothetical protein [Providencia alcalifaciens]
gi|491045848	91	16803	2	2	1	1	0.20	hypothetical protein [Providencia rettgeri]
gi|504471025	67	21440	1	1	1	1	0.16	hypothetical protein [Providencia stuartii]
gi|516518751	70	28488	1	1	1	1	0.12	hypothetical protein [Pseudomonas fuscovaginae]
gi|655213365	60	87419	1	1	1	1	0.04	hypothetical protein [Pseudomonas parafulva]
gi|489339990	98	22355	3	3	1	1	0.15	hypothetical protein [Pseudomonas putida]
gi|489339990	72	22355	2	2	1	1	0.15	hypothetical protein [Pseudomonas putida]
gi|489339990	66	22355	1	1	1	1	0.15	hypothetical protein [Pseudomonas putida]
gi|520813925	82	51193	2	2	1	1	0.06	hypothetical protein [Pseudomonas sp. CF161]
gi|489375981	80	20460	3	3	2	2	0.36	hypothetical protein [Pseudomonas stutzeri]
gi|489379895	68	13554	1	1	1	1	0.25	hypothetical protein [Pseudomonas stutzeri]
gi|489375981	66	20460	1	1	1	1	0.16	hypothetical protein [Pseudomonas stutzeri]
gi|657347932	45	21258	1	1	1	1	0.16	hypothetical protein [Pseudomonas stutzeri]
gi|489375981	100	20460	5	5	2	2	0.36	hypothetical protein [Pseudomonas stutzeri]
gi|489376585	105	13489	1	1	1	1	0.25	hypothetical protein [Pseudomonas stutzeri]
gi|657347932	51	21258	2	2	1	1	0.16	hypothetical protein [Pseudomonas stutzeri]
gi|639534262	64	107406	1	1	1	1	0.03	hypothetical protein [Pseudomonas syringae]
gi|639532422	56	40892	1	1	1	1	0.08	hypothetical protein [Pseudomonas syringae]
gi|503438108	60	16896	1	1	1	1	0.20	hypothetical protein [Pseudonocardia dioxanivorans]
gi|521258007	69	53880	1	1	1	1	0.06	hypothetical protein [Psychrobacter sp. G]
gi|521258007	144	53880	3	3	1	1	0.06	hypothetical protein [Psychrobacter sp. G]
gi|521258007	205	53880	5	5	1	1	0.06	hypothetical protein [Psychrobacter sp. G]
gi|490765046	71	30279	1	1	1	1	0.11	hypothetical protein [Ralstonia pickettii]
gi|549497632	59	81810	1	1	1	1	0.04	hypothetical protein [Ralstonia pickettii]
gi|489638385	64	12388	1	1	1	1	0.28	hypothetical protein [Rhizobium leguminosarum]
gi|494140431	45	50843	1	1	1	1	0.06	hypothetical protein [Rhodanobacter fulvus]
gi|499914264	62	5879	1	1	1	1	0.61	hypothetical protein [Rhodococcus jostii]
gi|515037347	67	43630	2	2	1	1	0.08	hypothetical protein [Rhodococcus rhodochrous]
gi|515037347	58	43630	1	1	1	1	0.08	hypothetical protein [Rhodococcus rhodochrous]
gi|515037347	59	43630	1	1	1	1	0.08	hypothetical protein [Rhodococcus rhodochrous]
gi|503186394	96	44976	1	1	1	1	0.07	hypothetical protein [Rhodomicrobium vannielii]
gi|503186394	78	44976	1	1	1	1	0.07	hypothetical protein [Rhodomicrobium vannielii]
gi|502605435	57	26533	1	1	1	1	0.13	hypothetical protein [Rhodothermus marinus]
gi|516544908	99	28352	3	3	1	1	0.12	hypothetical protein [Robiginitomaculum antarcticum]
gi|516544908	104	28352	3	3	1	1	0.12	hypothetical protein [Robiginitomaculum antarcticum]
gi|516544908	68	28352	2	2	1	1	0.12	hypothetical protein [Robiginitomaculum antarcticum]
gi|494063112	62	43617	2	2	1	1	0.08	hypothetical protein [Roseomonas cervicalis]
gi|494063112	58	43617	1	1	1	1	0.08	hypothetical protein [Roseomonas cervicalis]
gi|494063112	60	43617	1	1	1	1	0.08	hypothetical protein [Roseomonas cervicalis]
gi|662021327	60	22305	1	1	1	1	0.15	hypothetical protein [Ruegeria pomeroyi]
gi|662021327	59	22305	2	2	1	1	0.15	hypothetical protein [Ruegeria pomeroyi]
gi|657813631	56	119245	1	1	1	1	0.03	hypothetical protein [Saccharopolyspora spinosa]
gi|657813631	55	119245	2	2	1	1	0.03	hypothetical protein [Saccharopolyspora spinosa]
gi|499722534	65	10304	2	2	1	1	0.34	hypothetical protein [Salinibacter ruber]
gi|517648277	99	45227	1	1	1	1	0.07	hypothetical protein [Salinispora pacifica]
gi|517648277	83	45227	1	1	1	1	0.07	hypothetical protein [Salinispora pacifica]
gi|517648277	187	45227	3	3	1	1	0.07	hypothetical protein [Salinispora pacifica]
gi|446168601	59	49849	1	1	1	1	0.07	hypothetical protein [Salmonella enterica]
gi|516263300	78	97892	1	1	1	1	0.03	hypothetical protein [Sandarakinorhabdus sp. AAP62]
gi|502629352	47	6224	1	1	1	1	0.58	hypothetical protein [Sanguibacter keddieii]
gi|497835337	54	73692	1	1	1	1	0.04	hypothetical protein [SAR324 cluster bacterium JCVI-SC AAA005]
gi|498194723	86	27999	2	2	1	1	0.12	hypothetical protein [SAR324 cluster bacterium SCGC AAA001-C10]
gi|498194723	75	27999	2	2	1	1	0.12	hypothetical protein [SAR324 cluster bacterium SCGC AAA001-C10]
gi|518137719	70	95691	1	1	1	1	0.03	hypothetical protein [SAR324 cluster bacterium SCGC AAA240-J09]
gi|652355141	62	34746	1	1	1	1	0.10	hypothetical protein [Sediminibacterium sp. C3]
gi|499955556	58	58706	2	2	1	1	0.06	hypothetical protein [Shewanella frigidimarina]
gi|655363619	65	16006	1	1	1	1	0.21	hypothetical protein [Silanimonas lenta]
gi|515838262	58	56957	1	1	1	1	0.06	hypothetical protein [Sinorhizobium meliloti]
gi|522138477	66	16236	1	1	1	1	0.21	hypothetical protein [Solimonas variicoloris]
gi|654612076	80	97872	1	1	1	1	0.03	hypothetical protein [Solirubrobacterales bacterium URHD0059]
gi|522826038	61	51850	1	1	1	1	0.06	hypothetical protein [Sorangium cellulosum]
gi|522820452	38	11574	1	1	1	1	0.30	hypothetical protein [Sorangium cellulosum]
gi|544635704	55	79536	1	1	1	1	0.04	hypothetical protein [Sphingobacterium paucimobilis]
gi|646359344	83	115632	1	1	1	1	0.03	hypothetical protein [Sphingomonas sp. JGI 0001002-A17]
gi|646359344	56	115632	2	2	1	1	0.03	hypothetical protein [Sphingomonas sp. JGI 0001002-A17]
gi|499862306	56	50968	1	1	1	1	0.06	hypothetical protein [Sphingopyxis alaskensis]
gi|655904192	55	47467	1	1	1	1	0.07	hypothetical protein [Spirochaeta cellobiosiphila]
gi|551340890	36	92198	1	1	1	1	0.04	hypothetical protein [Spongiibacter tropicus]
gi|655912193	75	31157	2	2	1	1	0.11	hypothetical protein [Sporocytophaga myxococcoides]
gi|655912193	66	31157	1	1	1	1	0.11	hypothetical protein [Sporocytophaga myxococcoides]
gi|655912193	68	31157	2	2	1	1	0.11	hypothetical protein [Sporocytophaga myxococcoides]
gi|647405832	59	12989	1	1	1	1	0.26	hypothetical protein [Sporosarcina sp. D27]
gi|490251499	60	13059	1	1	1	1	0.26	hypothetical protein [Stenotrophomonas maltophilia]
gi|490376777	65	13958	1	1	1	1	0.24	hypothetical protein [Streptococcus mitis]
gi|490376777	61	13958	1	1	1	1	0.24	hypothetical protein [Streptococcus mitis]
gi|694122081	41	40959	1	1	1	1	0.08	hypothetical protein [Streptococcus pyogenes]
gi|671498626	50	60535	1	1	1	1	0.05	hypothetical protein [Streptomyces bicolor]
gi|490054939	59	30210	1	1	1	1	0.11	hypothetical protein [Streptomyces clavuligerus]
gi|665609577	36	25022	1	1	1	1	0.13	hypothetical protein [Streptomyces durhamensis]
gi|497743268	66	1107293	1	1	1	1		hypothetical protein [Streptomyces globisporus]
gi|497743268	57	1107293	1	1	1	1		hypothetical protein [Streptomyces globisporus]
gi|497743268	51	1107293	1	1	1	1		hypothetical protein [Streptomyces globisporus]
gi|517888926	57	36371	1	1	1	1	0.09	hypothetical protein [Streptomyces prunicolor]
gi|663396015	84	16761	1	1	1	1	0.20	hypothetical protein [Streptomyces purpeofuscus]
gi|663396015	63	16761	1	1	1	1	0.20	hypothetical protein [Streptomyces purpeofuscus]
gi|664063214	284	6988	18	18	1	1	0.51	hypothetical protein [Streptomyces rimosus]
gi|664063214	370	6988	21	21	1	1	0.51	hypothetical protein [Streptomyces rimosus]
gi|664063214	281	6988	20	20	1	1	0.51	hypothetical protein [Streptomyces rimosus]
gi|648526743	88	41030	3	3	1	1	0.08	hypothetical protein [Streptomyces scabrisporus]
gi|648526743	82	41030	2	2	1	1	0.08	hypothetical protein [Streptomyces scabrisporus]
gi|496366122	57	48478	1	1	1	1	0.07	hypothetical protein [Streptomyces sp. AA4]
gi|639152347	69	67614	3	3	1	1	0.05	hypothetical protein [Streptomyces sp. AW19M42]
gi|639152347	73	67614	2	2	1	1	0.05	hypothetical protein [Streptomyces sp. AW19M42]
gi|639146812	83	120399	2	2	1	1	0.03	hypothetical protein [Streptomyces sp. AW19M42]
gi|639152347	76	67614	3	3	1	1	0.05	hypothetical protein [Streptomyces sp. AW19M42]
gi|517389535	66	33543	4	4	1	1	0.10	hypothetical protein [Streptomyces sp. BoleA5]
gi|517389535	69	33543	5	5	1	1	0.10	hypothetical protein [Streptomyces sp. BoleA5]
gi|517389535	58	33543	2	2	1	1	0.10	hypothetical protein [Streptomyces sp. BoleA5]
gi|695855473	66	22501	1	1	1	1	0.15	hypothetical protein [Streptomyces sp. CNS654]
gi|695855473	59	22501	1	1	1	1	0.15	hypothetical protein [Streptomyces sp. CNS654]
gi|517677600	68	50585	1	1	1	1	0.07	hypothetical protein [Streptomyces sp. CNT372]
gi|512488734	52	18742	1	1	1	1	0.18	hypothetical protein [Streptomyces sp. HGB0020]
gi|664241441	88	30800	2	2	1	1	0.11	hypothetical protein [Streptomyces sp. NRRL F-2664]
gi|664241441	97	30800	3	3	1	1	0.11	hypothetical protein [Streptomyces sp. NRRL F-2664]
gi|664241441	128	30800	4	4	1	1	0.11	hypothetical protein [Streptomyces sp. NRRL F-2664]
gi|664486311	59	28462	1	1	1	1	0.12	hypothetical protein [Streptomyces sp. NRRL F-5727]
gi|664486311	57	28462	1	1	1	1	0.12	hypothetical protein [Streptomyces sp. NRRL F-5727]
gi|664486311	62	28462	1	1	1	1	0.12	hypothetical protein [Streptomyces sp. NRRL F-5727]
gi|664488241	109	32906	3	3	1	1	0.10	hypothetical protein [Streptomyces sp. NRRL WC-3773]
gi|664488241	136	32906	4	4	1	1	0.10	hypothetical protein [Streptomyces sp. NRRL WC-3773]
gi|496024810	66	50665	2	2	1	1	0.07	hypothetical protein [Streptomyces sp. SPB74]
gi|657317076	50	87763	2	2	1	1	0.04	hypothetical protein [Streptomyces sp. TOR3209]
gi|515471431	34	47688	1	1	1	1	0.07	hypothetical protein [Streptomyces sulphureus]
gi|496498873	107	42305	2	2	1	1	0.08	hypothetical protein [Sulfuricella denitrificans]
gi|496498873	100	42305	4	4	1	1	0.08	hypothetical protein [Sulfuricella denitrificans]
gi|496498873	109	42305	3	3	1	1	0.08	hypothetical protein [Sulfuricella denitrificans]
gi|500459711	39	6915	1	1	1	1	0.52	hypothetical protein [Synechococcus sp. WH 7803]
gi|497317611	112	14572	3	3	1	1	0.23	hypothetical protein [Synechocystis sp. PCC 7509]
gi|497317611	96	14572	2	2	1	1	0.23	hypothetical protein [Synechocystis sp. PCC 7509]
gi|497317611	143	14572	4	4	1	1	0.23	hypothetical protein [Synechocystis sp. PCC 7509]
gi|494152043	69	16954	1	1	1	1	0.20	hypothetical protein [Thalassospira xiamenensis]
gi|655942357	138	38209	4	4	1	1	0.09	hypothetical protein [Thermithiobacillus tepidarius]
gi|655942357	68	38209	4	4	2	2	0.18	hypothetical protein [Thermithiobacillus tepidarius]
gi|655941214	59	40983	1	1	1	1	0.08	hypothetical protein [Thermithiobacillus tepidarius]
gi|655942357	103	38209	3	3	1	1	0.09	hypothetical protein [Thermithiobacillus tepidarius]
gi|655941214	68	40983	2	2	1	1	0.08	hypothetical protein [Thermithiobacillus tepidarius]
gi|489965131	67	23677	1	1	1	1	0.14	hypothetical protein [Thermoanaerobacter ethanolicus]
gi|489965131	63	23677	1	1	1	1	0.14	hypothetical protein [Thermoanaerobacter ethanolicus]
gi|489965131	96	23677	5	5	1	1	0.14	hypothetical protein [Thermoanaerobacter ethanolicus]
gi|489139494	64	21977	2	2	1	1	0.15	hypothetical protein [Thermus aquaticus]
gi|489139494	84	21977	3	3	1	1	0.15	hypothetical protein [Thermus aquaticus]
gi|499630018	63	27376	1	1	1	1	0.12	hypothetical protein [Thiobacillus denitrificans]
gi|516745424	61	11042	1	1	1	1	0.31	hypothetical protein [Thiobacillus denitrificans]
gi|517333083	117	44113	4	4	3	3	0.24	hypothetical protein [Thiobacillus thioparus]
gi|517333354	100	69592	2	2	2	2	0.10	hypothetical protein [Thiobacillus thioparus]
gi|517333354	98	69592	3	3	3	3	0.15	hypothetical protein [Thiobacillus thioparus]
gi|517333083	104	44113	4	4	2	2	0.16	hypothetical protein [Thiobacillus thioparus]
gi|517333083	195	44113	10	10	3	3	0.24	hypothetical protein [Thiobacillus thioparus]
gi|521063666	54	12471	2	2	1	1	0.28	hypothetical protein [Thiothrix disciformis]
gi|521063666	52	12471	1	1	1	1	0.28	hypothetical protein [Thiothrix disciformis]
gi|551312269	61	28458	2	2	1	1	0.12	hypothetical protein [Treponema bryantii]
gi|551312269	60	28458	2	2	1	1	0.12	hypothetical protein [Treponema bryantii]
gi|513866926	73	59712	3	3	1	1	0.06	hypothetical protein [Treponema medium]
gi|513866926	63	59712	1	1	1	1	0.06	hypothetical protein [Treponema medium]
gi|297183662	58	14641	2	2	1	1	0.23	hypothetical protein [uncultured alpha proteobacterium EB000_37G09]
gi|515157941	61	66035	1	1	1	1	0.05	hypothetical protein [Vibrio cyclitrophicus]
gi|515157941	62	66035	1	1	1	1	0.05	hypothetical protein [Vibrio cyclitrophicus]
gi|515160005	54	28962	1	1	1	1	0.11	hypothetical protein [Vibrio cyclitrophicus]
gi|515620337	29	39395	1	1	1	1	0.08	hypothetical protein [Vibrio genomosp. F6]
gi|495499433	56	20439	2	2	1	1	0.16	hypothetical protein [Vibrionales bacterium SWAT-3]
gi|495237191	59	55048	1	1	1	1	0.06	hypothetical protein [Xanthomonas fuscans]
gi|495237191	59	55048	2	2	1	1	0.06	hypothetical protein [Xanthomonas fuscans]
gi|495237191	74	55048	4	4	1	1	0.06	hypothetical protein [Xanthomonas fuscans]
gi|648452045	57	33951	1	1	1	1	0.10	hypothetical protein [Xanthomonas sp. SHU308]
gi|493557557	75	17110	2	2	1	1	0.20	hypothetical protein [Xenococcus sp. PCC 7305]
gi|493557557	59	17110	1	1	1	1	0.20	hypothetical protein [Xenococcus sp. PCC 7305]
gi|493557557	64	17110	1	1	1	1	0.20	hypothetical protein [Xenococcus sp. PCC 7305]
gi|490858798	36	38999	1	1	1	1	0.08	hypothetical protein [Yersinia ruckeri]
gi|557306907	64	97859	1	1	1	1	0.03	hypothetical protein [Youngiibacter fragilis]
gi|521960261	45	15941	1	1	1	1	0.21	hypothetical protein [Zavarzinella formosa]
gi|660086465	62	17078	1	1	1	1	0.20	hypothetical protein AB07_0181 [Escherichia coli 5-172-05_S1_C1]
gi|612172781	76	99539	2	2	1	1	0.03	hypothetical protein ABAZ39_12930 [Azospirillum brasilense]
gi|406998394	55	56097	1	1	1	1	0.06	hypothetical protein ACD_11C00020G0033 [uncultured bacterium]
gi|406992285	57	12322	1	1	1	1	0.28	hypothetical protein ACD_15C00041G0002, partial [uncultured bacterium]
gi|406990654	57	17227	2	2	1	1	0.20	hypothetical protein ACD_16C00056G0008 [uncultured bacterium]
gi|406990654	53	17227	1	1	1	1	0.20	hypothetical protein ACD_16C00056G0008 [uncultured bacterium]
gi|406987855	63	75802	1	1	1	1	0.04	hypothetical protein ACD_17C00369G0001, partial [uncultured bacterium]
gi|406987855	62	75802	1	1	1	1	0.04	hypothetical protein ACD_17C00369G0001, partial [uncultured bacterium]
gi|406982786	61	36725	1	1	1	1	0.09	hypothetical protein ACD_20C00109G0013 [uncultured bacterium]
gi|406943007	43	31660	1	1	1	1	0.11	hypothetical protein ACD_44C00225G0002 [uncultured bacterium]
gi|406931143	59	15991	1	1	1	1	0.21	hypothetical protein ACD_49C00041G0005 [uncultured bacterium (gcode 4)]
gi|406930517	69	208541	1	1	1	1	0.02	hypothetical protein ACD_49C00078G0003 [uncultured bacterium (gcode 4)]
gi|406923914	66	4148	1	1	1	1	0.91	hypothetical protein ACD_54C00510G0004, partial [uncultured bacterium]
gi|406914322	74	12115	5	5	1	1	0.28	hypothetical protein ACD_61C00023G0010 [uncultured bacterium]
gi|406914322	66	12115	2	2	1	1	0.28	hypothetical protein ACD_61C00023G0010 [uncultured bacterium]
gi|406908948	61	58066	1	1	1	1	0.06	hypothetical protein ACD_63C00184G0003 [uncultured bacterium]
gi|406905274	57	73604	1	1	1	1	0.04	hypothetical protein ACD_67C00065G0001, partial [uncultured bacterium]
gi|407008633	50	40792	2	2	1	1	0.08	hypothetical protein ACD_6C00281G0012 [uncultured bacterium]
gi|407008633	45	40792	2	2	1	1	0.08	hypothetical protein ACD_6C00281G0012 [uncultured bacterium]
gi|407008320	68	77449	1	1	1	1	0.04	hypothetical protein ACD_6C00352G0002 [uncultured bacterium]
gi|407008324	65	37303	1	1	1	1	0.09	hypothetical protein ACD_6C00352G0006 [uncultured bacterium]
gi|407007907	62	50442	2	2	1	1	0.07	hypothetical protein ACD_6C00478G0003 [uncultured bacterium]
gi|407007424	53	35649	1	1	1	1	0.09	hypothetical protein ACD_6C00606G0005 [uncultured bacterium]
gi|406881795	55	23288	1	1	1	1	0.14	hypothetical protein ACD_78C00283G0002, partial [uncultured bacterium (gcode 4)]
gi|406874587	56	41329	1	1	1	1	0.08	hypothetical protein ACD_80C00226G0006 [uncultured bacterium (gcode 4)]
gi|407001511	69	17387	2	2	1	1	0.19	hypothetical protein ACD_9C00319G0002 [uncultured bacterium]
gi|407001511	65	17387	2	2	1	1	0.19	hypothetical protein ACD_9C00319G0002 [uncultured bacterium]
gi|407001511	81	17387	4	4	1	1	0.19	hypothetical protein ACD_9C00319G0002 [uncultured bacterium]
gi|666912610	57	31381	1	1	1	1	0.11	hypothetical protein AZ46_0201525 [Bacillus indicus LMG 22858]
gi|666912610	63	31381	5	5	1	1	0.11	hypothetical protein AZ46_0201525 [Bacillus indicus LMG 22858]
gi|666912610	81	31381	4	4	1	1	0.11	hypothetical protein AZ46_0201525 [Bacillus indicus LMG 22858]
gi|313135243	61	9033	2	2	1	1	0.39	hypothetical protein BFAG_01298 [Bacteroides fragilis 3_1_12]
gi|612182986	163	72351	5	5	5	5	0.25	hypothetical protein CF98_00135 [Pseudomonas bauzanensis]
gi|612182986	80	72351	1	1	1	1	0.05	hypothetical protein CF98_00135 [Pseudomonas bauzanensis]
gi|612182986	147	72351	4	4	3	3	0.14	hypothetical protein CF98_00135 [Pseudomonas bauzanensis]
gi|594025659	57	21379	1	1	1	1	0.16	hypothetical protein CH92_00540 [Pseudomonas stutzeri]
gi|152932389	49	4599	1	1	1	1	0.81	hypothetical protein CLC_0598 [Clostridium botulinum A str. Hall]
gi|670619685	60	50826	1	1	1	1	0.06	hypothetical protein DB31_1281 [Hyalangium minutum]
gi|660531851	60	40280	1	1	1	1	0.08	hypothetical protein DT23_01195 [Thioclava sp. DT23-4]
gi|660531851	58	40280	1	1	1	1	0.08	hypothetical protein DT23_01195 [Thioclava sp. DT23-4]
gi|312173858	52	44786	1	1	1	1	0.07	hypothetical protein EAIL5_3292 [Erwinia amylovora ATCC BAA-2158]
gi|575409792	70	66548	2	2	2	2	0.10	hypothetical protein ETSY1_28110, partial [Candidatus Entotheonella sp. TSY1]
gi|692533594	55	11392	1	1	1	1	0.30	hypothetical protein GS19_17550, partial [Acinetobacter sp. MII]
gi|294487580	69	30305	2	2	1	1	0.11	hypothetical protein HMPREF0405_01223 [Fusobacterium nucleatum subsp. vincentii 3_1_27]
gi|294487827	70	59061	1	1	1	1	0.06	hypothetical protein HMPREF0405_01468 [Fusobacterium nucleatum subsp. vincentii 3_1_27]
gi|354832023	62	60408	1	1	1	1	0.05	hypothetical protein HMPREF1030_00056 [Pseudomonas sp. 2_1_26]
gi|354832023	59	60408	1	1	1	1	0.05	hypothetical protein HMPREF1030_00056 [Pseudomonas sp. 2_1_26]
gi|690774269	36	18242	1	1	1	1	0.19	hypothetical protein HMPREF1651_07325 [Prevotella bivia DNF00188]
gi|300413382	50	14355	1	1	1	1	0.24	hypothetical protein HMPREF9540_03259, partial [Escherichia coli MS 115-1]
gi|630956448	64	69701	1	1	1	1	0.05	hypothetical protein HOC_10804 [Hyphomonas oceanitis SCH89]
gi|630956448	86	69701	3	3	1	1	0.05	hypothetical protein HOC_10804 [Hyphomonas oceanitis SCH89]
gi|630956448	72	69701	1	1	1	1	0.05	hypothetical protein HOC_10804 [Hyphomonas oceanitis SCH89]
gi|216946120	60	14086	1	1	1	1	0.24	hypothetical protein HPB128_2g51 [Helicobacter pylori B128]
gi|630777842	69	70275	1	1	1	1	0.05	hypothetical protein HY30_15115 [Hyphomonas sp. BH-BN04-4]
gi|674214385	63	105089	1	1	1	1	0.03	hypothetical protein ID47_11530 [Candidatus Paracaedibacter acanthamoebae]
gi|671234222	56	9179	1	1	1	1	0.38	hypothetical protein IW22_16150 [Chryseobacterium sp. JM1]
gi|410000959	78	6215	2	2	1	1	0.58	hypothetical protein LEP1GSC131_0276 [Leptospira kirschneri str. 200802841]
gi|410000959	52	6215	1	1	1	1	0.58	hypothetical protein LEP1GSC131_0276 [Leptospira kirschneri str. 200802841]
gi|687222252	56	20284	1	1	1	1	0.17	hypothetical protein LG45_14790 [Flavobacterium aquatile LMG 4008]
gi|353564836	57	3465	1	1	1	1	1.11	hypothetical protein LTSEADE_5046, partial [Salmonella enterica subsp. enterica serovar Adelaide str. A4-669]
gi|119713667	54	78197	1	1	1	1	0.04	hypothetical protein MBMO_EB0-39H12.0094 [uncultured marine bacterium EB0_39H12]
gi|574763920	65	67307	1	1	1	1	0.05	hypothetical protein MGAST_02125 [Mycobacterium gastri 'Wayne']
gi|574763920	66	67307	2	2	1	1	0.05	hypothetical protein MGAST_02125 [Mycobacterium gastri 'Wayne']
gi|380726014	58	7843	1	1	1	1	0.45	hypothetical protein MRGA423_16470 [Mycobacterium tuberculosis RGTB423]
gi|670936553	54	92992	1	1	1	1	0.04	hypothetical protein N008_11060 [Hymenobacter sp. APR13]
gi|308270301	53	52113	1	1	1	1	0.06	hypothetical protein N47_A09420 [uncultured Desulfobacterium sp.]
gi|308270301	56	52113	2	2	1	1	0.06	hypothetical protein N47_A09420 [uncultured Desulfobacterium sp.]
gi|575470048	29	77790	1	1	1	1	0.04	hypothetical protein OCH239_14600 [Roseivivax halodurans JCM 10272]
gi|571788895	86	27717	1	1	1	1	0.12	hypothetical protein OMM_03745 [Candidatus Magnetoglobus multicellularis str. Araruama]
gi|571788895	70	27717	1	1	1	1	0.12	hypothetical protein OMM_03745 [Candidatus Magnetoglobus multicellularis str. Araruama]
gi|571788895	69	27717	1	1	1	1	0.12	hypothetical protein OMM_03745 [Candidatus Magnetoglobus multicellularis str. Araruama]
gi|666448841	64	50486	4	4	1	1	0.07	hypothetical protein PC358_06715 [Pseudomonas sp. WCS358]
gi|695756661	65	18446	2	2	2	2	0.40	hypothetical protein PM03_01545 [Thalassobacter stenotrophicus]
gi|605574234	64	17760	2	2	1	1	0.19	hypothetical protein PSAB_09845 [Paenibacillus sabinae T27]
gi|566241906	70	13754	2	2	1	1	0.25	hypothetical protein Q616_SPPC01397G0008 [Streptococcus parasanguinis DORA_23_24]
gi|635601776	55	15433	1	1	1	1	0.22	hypothetical protein RRH01S_19_00070 [Rhizobium rhizogenes NBRC 13257]
gi|371548122	57	33587	2	2	1	1	0.10	hypothetical protein SMCF_4023 [Streptomyces coelicoflavus ZG0656]
gi|371548122	62	33587	2	2	1	1	0.10	hypothetical protein SMCF_4023 [Streptomyces coelicoflavus ZG0656]
gi|371548122	65	33587	2	2	1	1	0.10	hypothetical protein SMCF_4023 [Streptomyces coelicoflavus ZG0656]
gi|645881503	62	36771	1	1	1	1	0.09	hypothetical protein W824_06400, partial [Clavibacter cf. michiganensis LMG 26808]
gi|645881503	57	36771	1	1	1	1	0.09	hypothetical protein W824_06400, partial [Clavibacter cf. michiganensis LMG 26808]
gi|562963097	91	21803	2	2	1	1	0.15	hypothetical protein X772_08720 [Mesorhizobium sp. LSJC280B00]
gi|562963097	68	21803	1	1	1	1	0.15	hypothetical protein X772_08720 [Mesorhizobium sp. LSJC280B00]
gi|490416527	58	104046	1	1	1	1	0.03	hypothetical protein, partial [Bacteroides eggerthii]
gi|670499434	62	38859	1	1	1	1	0.09	hypothetical protein, partial [Caulobacteraceae bacterium PMMR1]
gi|657674473	36	19764	1	1	1	1	0.17	hypothetical protein, partial [Dehalococcoidia bacterium SCGC AB-539-J10]
gi|657674473	34	19764	1	1	1	1	0.17	hypothetical protein, partial [Dehalococcoidia bacterium SCGC AB-539-J10]
gi|657674473	39	19764	1	1	1	1	0.17	hypothetical protein, partial [Dehalococcoidia bacterium SCGC AB-539-J10]
gi|446250568	59	31456	1	1	1	1	0.11	hypothetical protein, partial [Escherichia coli]
gi|658615559	62	21482	1	1	1	1	0.16	hypothetical protein, partial [Fusobacterium nucleatum]
gi|671591276	90	36726	3	3	1	1	0.09	hypothetical protein, partial [Legionella wadsworthii]
gi|671591276	74	36726	2	2	1	1	0.09	hypothetical protein, partial [Legionella wadsworthii]
gi|671591276	78	36726	2	2	1	1	0.09	hypothetical protein, partial [Legionella wadsworthii]
gi|686463804	57	34135	1	1	1	1	0.10	hypothetical protein, partial [Leuconostoc pseudomesenteroides]
gi|665908022	58	7135	1	1	1	1	0.50	hypothetical protein, partial [Pelistega sp. HM-7]
gi|490050286	55	124566	1	1	1	1	0.03	hypothetical protein, partial [Streptomyces clavuligerus]
gi|490050286	53	124566	1	1	1	1	0.03	hypothetical protein, partial [Streptomyces clavuligerus]
gi|490050286	71	124566	2	2	1	1	0.03	hypothetical protein, partial [Streptomyces clavuligerus]
gi|663355657	67	510739	2	2	1	1	0.01	hypothetical protein, partial [Streptomyces scopuliridis]
gi|146469	48	66182	1	1	1	1	0.05	ilvD [Escherichia coli]
gi|146469	52	66182	1	1	1	1	0.05	ilvD [Escherichia coli]
gi|505057619	109	22494	8	8	1	1	0.15	imidazoleglycerol-phosphate dehydratase [Singulisphaera acidiphila]
gi|505057619	86	22494	8	8	1	1	0.15	imidazoleglycerol-phosphate dehydratase [Singulisphaera acidiphila]
gi|505057619	77	22494	8	8	1	1	0.15	imidazoleglycerol-phosphate dehydratase [Singulisphaera acidiphila]
gi|493487247	71	61443	2	2	1	1	0.05	inorganic pyrophosphatase [[Clostridium] hylemonae]
gi|493487247	64	61443	1	1	1	1	0.05	inorganic pyrophosphatase [[Clostridium] hylemonae]
gi|490372200	39	51812	1	1	1	1	0.06	inosine-5'-monophosphate dehydrogenase [Thauera sp. 63]
gi|375272087	107	24810	2	2	1	1	0.13	integrase, partial [uncultured bacterium]
gi|375272087	119	24810	2	2	1	1	0.13	integrase, partial [uncultured bacterium]
gi|505077624	62	26039	1	1	1	1	0.13	Ion channel [Echinicola vietnamensis]
gi|505077624	78	26039	3	3	1	1	0.13	Ion channel [Echinicola vietnamensis]
gi|505077624	67	26039	2	2	1	1	0.13	Ion channel [Echinicola vietnamensis]
gi|495683070	56	72707	1	1	1	1	0.05	Ion transport protein [Streptomyces sp. SM8]
gi|495683070	63	72707	1	1	1	1	0.05	Ion transport protein [Streptomyces sp. SM8]
gi|489396803	775	36586	38	38	12	12	2.66	iron ABC transporter periplasmic iron-binding protein [Pseudomonas stutzeri]
gi|515082926	120	36955	5	5	2	2	0.29	iron ABC transporter substrate-binding protein [Pseudomonas monteilii]
gi|489376123	465	36506	18	18	6	6	1.00	iron ABC transporter substrate-binding protein [Pseudomonas stutzeri]
gi|500264185	225	36484	11	11	5	5	0.68	iron ABC transporter substrate-binding protein [Pseudomonas stutzeri]
gi|500264185	618	36484	34	34	13	13	2.68	iron ABC transporter substrate-binding protein [Pseudomonas stutzeri]
gi|500264185	340	36484	19	19	7	7	1.00	iron ABC transporter substrate-binding protein [Pseudomonas stutzeri]
gi|489376123	423	36506	21	21	7	7	1.00	iron ABC transporter substrate-binding protein [Pseudomonas stutzeri]
gi|493960802	77	43614	2	2	1	1	0.08	iron ABC transporter substrate-binding protein [Thermaerobacter subterraneus]
gi|493960802	81	43614	2	2	1	1	0.08	iron ABC transporter substrate-binding protein [Thermaerobacter subterraneus]
gi|493960802	114	43614	3	3	1	1	0.08	iron ABC transporter substrate-binding protein [Thermaerobacter subterraneus]
gi|514969588	58	102548	1	1	1	1	0.03	iron complex outermembrane recepter protein [Acinetobacter rudis]
gi|504997115	56	50746	1	1	1	1	0.06	iron-regulated ABC transporter permease SufD [Microcoleus sp. PCC 7113]
gi|655457444	60	79872	1	1	1	1	0.04	isocitrate dehydrogenase [Thermomonas fusca]
gi|489333429	55	59267	2	2	1	1	0.06	isocitrate lyase [Pseudomonas mendocina]
gi|446136930	112	59590	2	2	1	1	0.06	isocitrate lyase, partial [Acinetobacter baumannii]
gi|446136930	131	59590	2	2	1	1	0.06	isocitrate lyase, partial [Acinetobacter baumannii]
gi|446136930	74	59590	1	1	1	1	0.06	isocitrate lyase, partial [Acinetobacter baumannii]
gi|658423523	57	51046	1	1	1	1	0.06	isopropylmalate isomerase [Methylocystis sp. SB2]
gi|493375851	50	43304	2	2	1	1	0.08	L-carnitine dehydratase [Gordonia rhizosphera]
gi|502681867	56	74785	2	2	1	1	0.04	ligand-gated channel [Xanthomonas albilineans]
gi|502681867	58	74785	5	5	1	1	0.04	ligand-gated channel [Xanthomonas albilineans]
gi|492774528	49	66442	1	1	1	1	0.05	ligand-gated channel protein [endosymbiont of Riftia pachyptila]
gi|492774528	41	66442	1	1	1	1	0.05	ligand-gated channel protein [endosymbiont of Riftia pachyptila]
gi|497816007	57	101119	1	1	1	1	0.03	ligand-gated channel protein [Microbulbifer agarilyticus]
gi|489073793	85	34445	2	2	1	1	0.10	lipid A biosynthesis acyltransferase [Chryseobacterium gleum]
gi|499631958	68	40634	2	2	1	1	0.08	long-chain fatty acid ABC transporter [Thiobacillus denitrificans]
gi|499631958	69	40634	2	2	1	1	0.08	long-chain fatty acid ABC transporter [Thiobacillus denitrificans]
gi|499631958	61	40634	3	3	1	1	0.08	long-chain fatty acid ABC transporter [Thiobacillus denitrificans]
gi|499630354	197	42460	10	10	4	4	0.45	long-chain fatty acid transport protein [Thiobacillus denitrificans]
gi|499630354	223	42460	10	10	4	4	0.45	long-chain fatty acid transport protein [Thiobacillus denitrificans]
gi|499630354	192	42460	10	10	4	4	0.35	long-chain fatty acid transport protein [Thiobacillus denitrificans]
gi|493470804	132	61811	5	5	1	1	0.05	long-chain fatty acid--CoA ligase [delta proteobacterium NaphS2]
gi|493470804	143	61811	5	5	1	1	0.05	long-chain fatty acid--CoA ligase [delta proteobacterium NaphS2]
gi|493470804	217	61811	10	10	1	1	0.05	long-chain fatty acid--CoA ligase [delta proteobacterium NaphS2]
gi|495868805	60	101370	2	2	1	1	0.03	long-chain fatty acid--CoA ligase [Nitratireductor pacificus]
gi|371548208	57	70209	1	1	1	1	0.05	long-chain-fatty acid CoA ligase [Streptomyces coelicoflavus ZG0656]
gi|636488017	98	26098	1	1	1	1	0.13	LOW QUALITY PROTEIN: ribosomal small subunit pseudouridine synthase A [Geomicrobium sp. JCM 19055]
gi|585096910	111	30701	3	3	1	1	0.11	LOW QUALITY PROTEIN: transcriptional regulator, LysR family, partial [Kutzneria sp. 744]
gi|585096910	107	30701	2	2	1	1	0.11	LOW QUALITY PROTEIN: transcriptional regulator, LysR family, partial [Kutzneria sp. 744]
gi|527033529	61	42377	1	1	1	1	0.08	low temperature requirement A [Desulfovibrio sp. X2]
gi|353777284	76	192898	2	2	1	1	0.02	LPXTG-motif cell wall anchor domain protein [Streptococcus pneumoniae GA44500]
gi|330722389	74	14744	1	1	1	1	0.23	LSU ribosomal protein L17p [gamma proteobacterium IMCC2047]
gi|652530441	57	23525	1	1	1	1	0.14	LuxR family transcriptional regulator [Glycomyces arizonensis]
gi|261889378	68	32007	1	1	1	1	0.10	LysR family regulator [Streptomyces flaveolus]
gi|261889378	64	32007	2	2	1	1	0.10	LysR family regulator [Streptomyces flaveolus]
gi|493225687	122	34521	2	2	1	1	0.10	LysR family transcriptional regulator [Mesorhizobium amorphae]
gi|505287750	49	32283	1	1	1	1	0.10	LysR family transcriptional regulator [Pseudomonas denitrificans]
gi|495650424	55	33571	1	1	1	1	0.10	LysR family transcriptional regulator [Pseudomonas sp. M47T1]
gi|496504710	58	42767	1	1	1	1	0.08	major facilitator transporter [Actinomyces sp. oral taxon 180]
gi|3201828	206	8841	8	8	4	4	2.77	major outer membrane lipoprotein I [Pseudomonas oleovorans]
gi|3201828	116	8841	5	5	2	2	0.94	major outer membrane lipoprotein I [Pseudomonas oleovorans]
gi|3201828	115	8841	3	3	3	3	1.71	major outer membrane lipoprotein I [Pseudomonas oleovorans]
gi|490460623	56	83510	1	1	1	1	0.04	malate dehydrogenase (oxaloacetate-decarboxylating) (NADP(+)) [Porphyromonas asaccharolytica]
gi|490829135	138	35361	4	4	3	3	0.31	malate dehydrogenase [Acinetobacter johnsonii]
gi|639815125	45	59110	1	1	1	1	0.06	malate dehydrogenase [Lactobacillus namurensis]
gi|494637352	34	84629	1	1	1	1	0.04	malate synthase [Psychrobacter sp. 1501(2011)]
gi|346421786	57	78583	1	1	1	1	0.04	malate synthase G [Pseudomonas sp. 19-rlim]
gi|498209174	61	29986	2	2	1	1	0.11	Male sterility domain-containing protein [Flavobacteriaceae bacterium HQM9]
gi|502835122	78	84118	5	5	1	1	0.04	malic enzyme [Zunongwangia profunda]
gi|502835122	66	84118	3	3	1	1	0.04	malic enzyme [Zunongwangia profunda]
gi|657241441	100	34639	2	2	1	1	0.10	mandelate racemase [Mesorhizobium ciceri]
gi|489311279	49	30015	1	1	1	1	0.11	mechanosensitive ion channel protein [Bacillus subtilis]
gi|489311279	55	30015	1	1	1	1	0.11	mechanosensitive ion channel protein [Bacillus subtilis]
gi|489311279	63	30015	2	2	1	1	0.11	mechanosensitive ion channel protein [Bacillus subtilis]
gi|499513303	54	26924	1	1	1	1	0.12	membrane protein [[Mannheimia] succiniciproducens]
gi|692308148	33	15576	1	1	1	1	0.22	membrane protein [Aliivibrio wodanis]
gi|640196003	56	23454	1	1	1	1	0.14	membrane protein [Arthrobacter sp. 31Y]
gi|504006364	77	36028	1	1	1	1	0.09	membrane protein [Azospirillum brasilense]
gi|504006364	63	36028	1	1	1	1	0.09	membrane protein [Azospirillum brasilense]
gi|504006364	68	36028	1	1	1	1	0.09	membrane protein [Azospirillum brasilense]
gi|495927326	26	122203	1	1	1	1	0.03	membrane protein [Bacteroides sp. 3_1_23]
gi|488729342	45	48714	1	1	1	1	0.07	membrane protein [Blastopirellula marina]
gi|646375011	60	18825	1	1	1	1	0.18	membrane protein [Bordetella trematum]
gi|493442283	81	40762	1	1	1	1	0.08	membrane protein [Burkholderia multivorans]
gi|493442283	136	40762	3	3	1	1	0.08	membrane protein [Burkholderia multivorans]
gi|491436049	81	34583	2	2	1	1	0.10	membrane protein [Corynebacterium jeikeium]
gi|601439851	75	39749	2	2	1	1	0.08	membrane protein [Cupriavidus sp. SK-4]
gi|601439851	76	39749	2	2	1	1	0.08	membrane protein [Cupriavidus sp. SK-4]
gi|601439851	113	39749	7	7	1	1	0.08	membrane protein [Cupriavidus sp. SK-4]
gi|493585885	74	17413	1	1	1	1	0.19	membrane protein [Frankia sp. EUN1f]
gi|648295116	65	32536	2	2	1	1	0.10	membrane protein [Herbaspirillum massiliense]
gi|489786735	56	23377	1	1	1	1	0.14	membrane protein [Lactobacillus mali]
gi|489978894	58	48458	1	1	1	1	0.07	membrane protein [Mycobacterium fortuitum]
gi|492482353	62	51614	1	1	1	1	0.06	membrane protein [Parabacteroides distasonis]
gi|499853266	60	62017	1	1	1	1	0.05	membrane protein [Pseudomonas entomophila]
gi|499853266	57	62017	1	1	1	1	0.05	membrane protein [Pseudomonas entomophila]
gi|515814265	234	43206	7	7	4	4	0.34	membrane protein [Pseudomonas stutzeri]
gi|515814265	803	43206	17	17	7	7	1.09	membrane protein [Pseudomonas stutzeri]
gi|515814265	449	43206	11	11	4	4	0.34	membrane protein [Pseudomonas stutzeri]
gi|499310410	159	38665	3	3	1	1	0.09	membrane protein [Ralstonia solanacearum]
gi|499310410	103	38665	2	2	1	1	0.09	membrane protein [Ralstonia solanacearum]
gi|499310410	177	38665	3	3	1	1	0.09	membrane protein [Ralstonia solanacearum]
gi|498280761	65	23173	3	3	1	1	0.14	membrane protein [Rhodococcus sp. P14]
gi|498280761	55	23173	1	1	1	1	0.14	membrane protein [Rhodococcus sp. P14]
gi|497835631	89	35283	1	1	1	1	0.09	membrane protein [SAR324 cluster bacterium JCVI-SC AAA005]
gi|654602879	45	108184	1	1	1	1	0.03	membrane protein [Sphingobacterium thalpophilum]
gi|503918879	68	59236	2	2	1	1	0.06	membrane protein [Streptomyces flavogriseus]
gi|664562314	57	40543	1	1	1	1	0.08	membrane protein [Streptomyces sp. NRRL S-118]
gi|493495416	30	46419	1	1	1	1	0.07	membrane protein [Xanthomonas gardneri]
gi|602520687	63	113521	3	3	1	1	0.03	membrane-anchored adenylyl cyclase [Mycobacterium vulneris]
gi|602520687	57	113521	3	3	1	1	0.03	membrane-anchored adenylyl cyclase [Mycobacterium vulneris]
gi|491433752	199	21158	5	5	1	1	0.16	MerR family transcriptional regulator [Corynebacterium genitalium]
gi|491433752	93	21158	1	1	1	1	0.16	MerR family transcriptional regulator [Corynebacterium genitalium]
gi|491433752	235	21158	7	7	1	1	0.16	MerR family transcriptional regulator [Corynebacterium genitalium]
gi|503014757	53	12019	1	1	1	1	0.29	metal-binding protein SmbP [Candidatus Nitrospira defluvii]
gi|654954551	62	218980	2	2	1	1	0.01	metallophosphoesterase [Bacillus sp. J13]
gi|654954551	70	218980	3	3	1	1	0.01	metallophosphoesterase [Bacillus sp. J13]
gi|654954551	75	218980	4	4	1	1	0.01	metallophosphoesterase [Bacillus sp. J13]
gi|546488777	57	55116	1	1	1	1	0.06	metalloprotease yebA [Clostridium sp. CAG:1193]
gi|546488777	67	55116	3	3	1	1	0.06	metalloprotease yebA [Clostridium sp. CAG:1193]
gi|495026617	58	7082	1	1	1	1	0.50	Methionine ABC transporter ATP-binding protein [Cronobacter dublinensis]
gi|499499725	59	36478	1	1	1	1	0.09	methionine ABC transporter ATP-binding protein [Leifsonia xyli]
gi|499499725	60	36478	2	2	1	1	0.09	methionine ABC transporter ATP-binding protein [Leifsonia xyli]
gi|571191322	60	18716	1	1	1	1	0.18	Methionine ABC transporter substrate-binding protein [Escherichia coli ISC11]
gi|502699544	79	73127	2	2	1	1	0.04	methyl-accepting chemotaxis protein [Conexibacter woesei]
gi|258583646	57	57976	1	1	1	1	0.06	methyl-accepting chemotaxis protein [Vibrio mimicus VM603]
gi|258583646	76	57976	2	2	1	1	0.06	methyl-accepting chemotaxis protein [Vibrio mimicus VM603]
gi|312172709	68	57468	3	3	1	1	0.06	Methyl-accepting chemotaxis protein I [Erwinia amylovora ATCC BAA-2158]
gi|312172709	64	57468	3	3	1	1	0.06	Methyl-accepting chemotaxis protein I [Erwinia amylovora ATCC BAA-2158]
gi|312172709	57	57468	1	1	1	1	0.06	Methyl-accepting chemotaxis protein I [Erwinia amylovora ATCC BAA-2158]
gi|646530573	47	154764	1	1	1	1	0.02	methylase [Sphingobium sp. KK22]
gi|587641191	40	55810	1	1	1	1	0.06	methylmalonyl-CoA carboxyltransferase [Skermanella stibiiresistens SB22]
gi|490695482	56	28704	1	1	1	1	0.12	methyltransferase [Amycolatopsis vancoresmycina]
gi|497309324	53	79539	2	2	1	1	0.04	methyltransferase [Pseudomonas sp. M1]
gi|497309324	54	79539	1	1	1	1	0.04	methyltransferase [Pseudomonas sp. M1]
gi|584601521	58	110890	2	2	1	1	0.03	methyltransferase [Sulfurospirillum multivorans DSM 12446]
gi|584601521	60	110890	5	5	1	1	0.03	methyltransferase [Sulfurospirillum multivorans DSM 12446]
gi|646859854	50	50974	1	1	1	1	0.06	MFS transporter [Burkholderia sp. WSM2230]
gi|663734786	62	41658	2	2	1	1	0.08	MFS transporter [Microbispora rosea]
gi|663734786	53	41658	2	2	1	1	0.08	MFS transporter [Microbispora rosea]
gi|503593220	63	42567	1	1	1	1	0.08	MFS transporter [Mycobacterium sp. JDM601]
gi|495505380	59	46203	1	1	1	1	0.07	MFS transporter [Roseobacter sp. GAI101]
gi|499630727	80	39175	1	1	1	1	0.08	MFS transporter [Thiobacillus denitrificans]
gi|661254044	64	51770	1	1	1	1	0.06	MFS transporter, partial [Burkholderia sp. A1]
gi|661254044	82	51770	4	4	1	1	0.06	MFS transporter, partial [Burkholderia sp. A1]
gi|544733079	56	31763	2	2	1	1	0.10	Mobile element protein [Burkholderia sp. AU4i]
gi|499293070	83	490170	3	3	1	1	0.01	modular polyketide synthase [Streptomyces avermitilis]
gi|499293070	58	490170	1	1	1	1	0.01	modular polyketide synthase [Streptomyces avermitilis]
gi|499293070	78	490170	3	3	1	1	0.01	modular polyketide synthase [Streptomyces avermitilis]
gi|656047888	53	46457	2	2	1	1	0.07	modulator protein [Brevundimonas aveniformis]
gi|656047888	57	46457	1	1	1	1	0.07	modulator protein [Brevundimonas aveniformis]
gi|501070468	81	53946	2	2	1	1	0.06	molecular chaperone DnaJ [Roseiflexus castenholzii]
gi|501070468	71	53946	1	1	1	1	0.06	molecular chaperone DnaJ [Roseiflexus castenholzii]
gi|499788476	72	68308	2	2	1	1	0.05	molecular chaperone DnaK [Saccharophagus degradans]
gi|499788476	74	68308	2	2	1	1	0.05	molecular chaperone DnaK [Saccharophagus degradans]
gi|494293543	40	56571	1	1	1	1	0.06	molecular chaperone GroEL [Mycobacterium parascrofulaceum]
gi|654722226	51	27286	1	1	1	1	0.12	molybdenum ABC transporter substrate-binding protein [Bradyrhizobium japonicum]
gi|446886594	61	15471	1	1	1	1	0.22	mulitfunctional nucleoside diphosphate kinase/apyrimidinic endonuclease/3'-phosphodiesterase [Acinetobacter baumannii]
gi|647271751	51	112868	1	1	1	1	0.03	multidrug ABC transporter [Paenibacillus polymyxa]
gi|503680646	66	66472	1	1	1	1	0.05	multidrug ABC transporter ATPase [Paenibacillus mucilaginosus]
gi|490938435	54	66572	1	1	1	1	0.05	multidrug ABC transporter ATP-binding protein [[Eubacterium] dolichum]
gi|499268296	59	64191	1	1	1	1	0.05	multidrug ABC transporter ATP-binding protein [Clostridium acetobutylicum]
gi|503853773	75	99829	1	1	1	1	0.03	multidrug ABC transporter ATP-binding protein [Pseudogulbenkiania sp. NH8B]
gi|503853773	82	99829	3	3	1	1	0.03	multidrug ABC transporter ATP-binding protein [Pseudogulbenkiania sp. NH8B]
gi|489193829	61	57211	1	1	1	1	0.06	multidrug ABC transporter ATP-binding protein [Streptococcus parauberis]
gi|517936854	57	65098	1	1	1	1	0.05	multidrug resistance protein [Peptoniphilus senegalensis]
gi|654923095	69	110783	2	2	1	1	0.03	multidrug transporter [Legionella lansingensis]
gi|490427222	48	117031	1	1	1	1	0.03	multidrug transporter AcrB [Bacteroides ovatus]
gi|504123315	149	50619	3	3	1	1	0.07	multidrug transporter MatE [Acetobacterium woodii]
gi|504123315	110	50619	2	2	1	1	0.07	multidrug transporter MatE [Acetobacterium woodii]
gi|504123315	123	50619	2	2	1	1	0.07	multidrug transporter MatE [Acetobacterium woodii]
gi|495432652	56	55898	3	3	1	1	0.06	multidrug transporter MatE [Parabacteroides johnsonii]
gi|489655175	70	13531	2	2	1	1	0.25	MULTISPECIES: 30S ribosomal protein S13 [Lactobacillus]
gi|489655175	74	13531	3	3	1	1	0.25	MULTISPECIES: 30S ribosomal protein S13 [Lactobacillus]
gi|489655175	77	13531	4	4	1	1	0.25	MULTISPECIES: 30S ribosomal protein S13 [Lactobacillus]
gi|488973020	84	10356	2	2	1	1	0.34	MULTISPECIES: 30S ribosomal protein S17 [Bacteria]
gi|488973020	64	10356	1	1	1	1	0.34	MULTISPECIES: 30S ribosomal protein S17 [Bacteria]
gi|446452067	54	27904	1	1	1	1	0.12	MULTISPECIES: 30S ribosomal protein S3 [Acinetobacter]
gi|490405128	55	17649	1	1	1	1	0.19	MULTISPECIES: 30S ribosomal protein S7 [Acinetobacter]
gi|490408037	61	11151	1	1	1	1	0.31	MULTISPECIES: 50S ribosomal protein L24 [Acinetobacter]
gi|495002638	26	10768	1	1	1	1	0.32	MULTISPECIES: 50S ribosomal protein L27 [Brevibacillus]
gi|489184311	63	12472	1	1	1	1	0.28	MULTISPECIES: 50S ribosomal protein L7/L12 [Pseudomonas]
gi|446930573	157	16529	6	6	3	3	1.11	MULTISPECIES: 6,7-dimethyl-8-ribityllumazine synthase [Acinetobacter]
gi|446930573	277	16529	14	14	2	2	0.75	MULTISPECIES: 6,7-dimethyl-8-ribityllumazine synthase [Acinetobacter]
gi|489382472	136	16511	4	4	2	2	0.75	MULTISPECIES: 6,7-dimethyl-8-ribityllumazine synthase [Pseudomonas]
gi|489268588	65	16486	1	1	1	1	0.20	MULTISPECIES: 6,7-dimethyl-8-ribityllumazine synthase [Pseudomonas]
gi|489268588	226	16486	5	5	2	2	0.45	MULTISPECIES: 6,7-dimethyl-8-ribityllumazine synthase [Pseudomonas]
gi|495852198	65	17962	2	2	1	1	0.19	MULTISPECIES: acetyltransferase [Xanthomonas]
gi|495852198	60	17962	2	2	1	1	0.19	MULTISPECIES: acetyltransferase [Xanthomonas]
gi|447202615	79	8663	1	1	1	1	0.40	MULTISPECIES: acyl carrier protein [Acinetobacter]
gi|447202615	122	8663	2	2	1	1	0.40	MULTISPECIES: acyl carrier protein [Acinetobacter]
gi|447202615	103	8663	2	2	1	1	0.40	MULTISPECIES: acyl carrier protein [Acinetobacter]
gi|489376944	77	8693	2	2	1	1	0.40	MULTISPECIES: acyl carrier protein [Pseudomonadaceae]
gi|489376944	61	8693	2	2	1	1	0.40	MULTISPECIES: acyl carrier protein [Pseudomonadaceae]
gi|489376944	52	8693	3	3	1	1	0.40	MULTISPECIES: acyl carrier protein [Pseudomonadaceae]
gi|491015584	516	64972	16	16	7	7	0.41	MULTISPECIES: acyl-CoA dehydrogenase [Acinetobacter]
gi|489183489	131	37236	4	4	2	2	0.19	MULTISPECIES: amino acid ABC transporter substrate-binding protein [Pseudomonas]
gi|490830435	243	40853	11	11	7	7	0.72	MULTISPECIES: aspartate-semialdehyde dehydrogenase [Acinetobacter]
gi|490830435	827	40853	34	34	9	9	2.21	MULTISPECIES: aspartate-semialdehyde dehydrogenase [Acinetobacter]
gi|692177250	56	108036	2	2	1	1	0.03	MULTISPECIES: chemotaxis protein [Alteromonas]
gi|692177250	57	108036	2	2	1	1	0.03	MULTISPECIES: chemotaxis protein [Alteromonas]
gi|692177250	58	108036	3	3	1	1	0.03	MULTISPECIES: chemotaxis protein [Alteromonas]
gi|491960643	31	31294	1	1	1	1	0.11	MULTISPECIES: cobyrinic acid a,c-diamide synthase [Lactobacillus]
gi|446452024	40	60827	1	1	1	1	0.05	MULTISPECIES: conjugal transfer protein [Salmonella]
gi|490408512	71	14008	3	3	1	1	0.24	MULTISPECIES: copper resistance protein C [Acinetobacter]
gi|490408512	66	14008	1	1	1	1	0.24	MULTISPECIES: copper resistance protein C [Acinetobacter]
gi|489015577	60	45141	1	1	1	1	0.07	MULTISPECIES: coproporphyrinogen III oxidase [Thauera]
gi|488799728	53	31569	1	1	1	1	0.11	MULTISPECIES: dihydrodipicolinate synthase [Bradyrhizobiaceae]
gi|490405531	63	38771	1	1	1	1	0.09	MULTISPECIES: dihydroorotase [Acinetobacter]
gi|489394155	172	17473	2	2	2	2	0.43	MULTISPECIES: DNA-binding stress protein [Pseudomonas stutzeri subgroup]
gi|488085619	146	43081	4	4	3	3	0.25	MULTISPECIES: elongation factor Tu [Acinetobacter]
gi|490833740	79	30580	2	2	2	2	0.23	MULTISPECIES: endo-1,4-D-glucanase [Acinetobacter]
gi|447109379	83	55500	1	1	1	1	0.06	MULTISPECIES: F0F1 ATP synthase subunit alpha [Acinetobacter]
gi|493911762	56	16046	1	1	1	1	0.21	MULTISPECIES: FeS cluster assembly scaffold IscU [Roseburia]
gi|493911762	68	16046	3	3	1	1	0.21	MULTISPECIES: FeS cluster assembly scaffold IscU [Roseburia]
gi|519012058	39	48281	1	1	1	1	0.07	MULTISPECIES: flavocytochrome C sulfide dehydrogenase [Methylotenera]
gi|489968177	60	35450	2	2	1	1	0.09	MULTISPECIES: glucitol operon activator [Thermoanaerobacter]
gi|489662255	46	29693	2	2	1	1	0.11	MULTISPECIES: glutamine ABC transporter substrate-binding protein [Lactobacillus casei group]
gi|489662255	46	29693	1	1	1	1	0.11	MULTISPECIES: glutamine ABC transporter substrate-binding protein [Lactobacillus casei group]
gi|489662255	51	29693	3	3	1	1	0.11	MULTISPECIES: glutamine ABC transporter substrate-binding protein [Lactobacillus casei group]
gi|490790515	110	52277	3	3	3	3	0.20	MULTISPECIES: glutamine synthetase [Acinetobacter]
gi|490833617	432	52317	19	19	9	9	0.84	MULTISPECIES: glutamine synthetase [Acinetobacter]
gi|490776271	340	52359	13	13	7	7	0.53	MULTISPECIES: glutamine synthetase [Acinetobacter]
gi|516969263	108	55104	2	2	2	2	0.12	MULTISPECIES: glycerol kinase [Microbacteriaceae]
gi|518154735	56	25800	1	1	1	1	0.13	MULTISPECIES: GntR family transcriptional regulator [Streptomyces]
gi|492395894	60	23821	1	1	1	1	0.14	MULTISPECIES: hisitidine kinase [Bacteroides]
gi|496330806	65	93718	3	3	1	1	0.03	MULTISPECIES: histidine kinase [Bacteroides]
gi|496330806	64	93718	2	2	1	1	0.03	MULTISPECIES: histidine kinase [Bacteroides]
gi|496427574	55	17761	1	1	1	1	0.19	MULTISPECIES: histidine kinase [Odoribacter]
gi|489535562	51	46333	2	2	1	1	0.07	MULTISPECIES: homoserine dehydrogenase [Pseudomonas]
gi|489535562	50	46333	1	1	1	1	0.07	MULTISPECIES: homoserine dehydrogenase [Pseudomonas]
gi|491322046	296	65043	12	12	10	10	0.72	MULTISPECIES: hypothetical protein [Acinetobacter]
gi|490946678	235	44403	9	9	5	5	0.54	MULTISPECIES: hypothetical protein [Acinetobacter]
gi|491318533	407	22833	16	16	5	5	1.27	MULTISPECIES: hypothetical protein [Acinetobacter]
gi|491323749	108	7303	2	2	2	2	1.20	MULTISPECIES: hypothetical protein [Acinetobacter]
gi|490404303	44	7420	1	1	1	1	0.48	MULTISPECIES: hypothetical protein [Acinetobacter]
gi|490896215	269	28306	7	7	4	4	0.56	MULTISPECIES: hypothetical protein [Acinetobacter]
gi|491120253	143	7304	5	5	3	3	2.27	MULTISPECIES: hypothetical protein [Acinetobacter]
gi|490838377	57	35135	1	1	1	1	0.09	MULTISPECIES: hypothetical protein [Acinetobacter]
gi|490812808	70	7379	1	1	1	1	0.48	MULTISPECIES: hypothetical protein [Acinetobacter]
gi|490838377	61	35135	1	1	1	1	0.09	MULTISPECIES: hypothetical protein [Acinetobacter]
gi|490404303	46	7420	1	1	1	1	0.48	MULTISPECIES: hypothetical protein [Acinetobacter]
gi|517876485	90	40131	2	2	1	1	0.08	MULTISPECIES: hypothetical protein [Actinomycetales]
gi|517876485	58	40131	1	1	1	1	0.08	MULTISPECIES: hypothetical protein [Actinomycetales]
gi|495311194	73	12029	3	3	1	1	0.29	MULTISPECIES: hypothetical protein [Alphaproteobacteria]
gi|488675596	45	26263	2	2	1	1	0.13	MULTISPECIES: hypothetical protein [Bacteria]
gi|494979798	58	60435	1	1	1	1	0.05	MULTISPECIES: hypothetical protein [Clostridiales]
gi|651624883	72	8099	2	2	1	1	0.43	MULTISPECIES: hypothetical protein [Ensifer]
gi|503712321	57	34182	2	2	1	1	0.10	MULTISPECIES: hypothetical protein [Hyphomicrobium]
gi|489505326	57	23231	1	1	1	1	0.14	MULTISPECIES: hypothetical protein [Mycobacterium tuberculosis complex]
gi|560180091	44	6856	1	1	1	1	0.52	MULTISPECIES: hypothetical protein [Pandoraea]
gi|495189619	66	24117	1	1	1	1	0.14	MULTISPECIES: hypothetical protein [Pseudomonas]
gi|490230610	39	21457	1	1	1	1	0.16	MULTISPECIES: hypothetical protein [Rhizobium]
gi|494776173	68	21971	1	1	1	1	0.15	MULTISPECIES: hypothetical protein [Rhodanobacter]
gi|518762198	53	39016	1	1	1	1	0.08	MULTISPECIES: hypothetical protein [Rhodocyclaceae]
gi|518759271	63	34023	1	1	1	1	0.10	MULTISPECIES: hypothetical protein [Rhodocyclaceae]
gi|518759271	60	34023	1	1	1	1	0.10	MULTISPECIES: hypothetical protein [Rhodocyclaceae]
gi|517673400	49	37455	1	1	1	1	0.09	MULTISPECIES: hypothetical protein [Streptomyces]
gi|517669744	53	10918	1	1	1	1	0.32	MULTISPECIES: hypothetical protein [Streptomyces]
gi|517768217	53	39404	1	1	1	1	0.08	MULTISPECIES: hypothetical protein [Thioalkalivibrio]
gi|663335979	58	23139	1	1	1	1	0.15	MULTISPECIES: hypothetical protein, partial [Streptomyces]
gi|663297892	58	14191	1	1	1	1	0.24	MULTISPECIES: hypothetical protein, partial [Streptomyces]
gi|664239521	57	81817	1	1	1	1	0.04	MULTISPECIES: hypothetical protein, partial [Streptomyces]
gi|517717192	69	17506	2	2	1	1	0.19	MULTISPECIES: MarR family transcriptional regulator [Paenibacillus]
gi|490951905	61	27792	1	1	1	1	0.12	MULTISPECIES: membrane protein [Acinetobacter]
gi|491570614	35	32208	1	1	1	1	0.10	MULTISPECIES: methylenetetrahydrofolate reductase [Clostridiales]
gi|491570614	34	32208	2	2	1	1	0.10	MULTISPECIES: methylenetetrahydrofolate reductase [Clostridiales]
gi|446702980	79	12196	2	2	1	1	0.28	MULTISPECIES: nitrogen regulatory protein P-II 1 [Acinetobacter]
gi|496531500	59	33473	1	1	1	1	0.10	MULTISPECIES: peptidase S66 [Ralstonia]
gi|496531500	65	33473	2	2	1	1	0.10	MULTISPECIES: peptidase S66 [Ralstonia]
gi|491521743	40	31874	1	1	1	1	0.10	MULTISPECIES: peptide ABC transporter ATPase [Vibrio harveyi group]
gi|493536205	66	25757	1	1	1	1	0.13	MULTISPECIES: PhoB family transcriptional regulator [Mesotoga]
gi|516272856	29	34887	1	1	1	1	0.10	MULTISPECIES: porin [Pseudomonas]
gi|490746036	33	97816	1	1	1	1	0.03	MULTISPECIES: preprotein translocase subunit SecA [Lachnospiraceae]
gi|446044588	56	19252	1	1	1	1	0.18	MULTISPECIES: pyrophosphatase [Acinetobacter]
gi|446044588	116	19252	3	3	3	3	0.62	MULTISPECIES: pyrophosphatase [Acinetobacter]
gi|491156722	318	23018	9	9	3	3	0.72	MULTISPECIES: superoxide dismutase [Acinetobacter]
gi|489746568	175	22862	8	8	3	3	0.51	MULTISPECIES: superoxide dismutase [Acinetobacter]
gi|491156722	217	23018	6	6	3	3	0.72	MULTISPECIES: superoxide dismutase [Acinetobacter]
gi|491156722	118	23018	3	3	2	2	0.31	MULTISPECIES: superoxide dismutase [Acinetobacter]
gi|516870489	75	24445	2	2	1	1	0.14	MULTISPECIES: thymidylate kinase [Thioalkalivibrio]
gi|516870489	120	24445	3	3	1	1	0.14	MULTISPECIES: thymidylate kinase [Thioalkalivibrio]
gi|516870489	124	24445	3	3	1	1	0.14	MULTISPECIES: thymidylate kinase [Thioalkalivibrio]
gi|490749330	58	16064	1	1	1	1	0.21	MULTISPECIES: toxin MazF [Lachnospiraceae]
gi|489079531	61	22979	2	2	1	1	0.15	MULTISPECIES: tRNA-hydroxylase [Myroides]
gi|490405369	71	47338	1	1	1	1	0.07	MULTISPECIES: type II citrate synthase [Acinetobacter]
gi|548293726	38	79861	1	1	1	1	0.04	n-6 DNA methylase [Fusobacterium sp. CAG:815]
gi|261890451	47	48612	1	1	1	1	0.07	N-Acetyl-D-glucosamine ABC transport system sugar-binding protein [Vibrio mimicus MB-451]
gi|496681244	60	33473	1	1	1	1	0.10	N-acetylneuraminate lyase [Subdoligranulum sp. 4_3_54A2FAA]
gi|496681244	70	33473	2	2	1	1	0.10	N-acetylneuraminate lyase [Subdoligranulum sp. 4_3_54A2FAA]
gi|502981611	62	39660	2	2	1	1	0.08	NAD(P) transhydrogenase subunit alpha [Hyphomicrobium denitrificans]
gi|502981611	64	39660	2	2	1	1	0.08	NAD(P) transhydrogenase subunit alpha [Hyphomicrobium denitrificans]
gi|505249559	52	20406	1	1	1	1	0.16	NADH dehydrogenase I, chain J [Azoarcus sp. KH32C]
gi|505249559	57	20406	1	1	1	1	0.16	NADH dehydrogenase I, chain J [Azoarcus sp. KH32C]
gi|678277180	56	36517	1	1	1	1	0.09	NADH-quinone oxidoreductase subunit H [Criblamydia sequanensis CRIB-18]
gi|671229740	56	20058	1	1	1	1	0.17	NADPH-dependent FMN reductase [Chryseobacterium soli]
gi|490789206	135	49100	10	10	6	6	0.48	NADP-specific glutamate dehydrogenase [Acinetobacter bohemicus]
gi|490789206	53	49100	1	1	1	1	0.07	NADP-specific glutamate dehydrogenase [Acinetobacter bohemicus]
gi|491321313	172	49101	7	7	6	6	0.48	NADP-specific glutamate dehydrogenase [Acinetobacter sp. CIP 53.82]
gi|558562795	54	56843	1	1	1	1	0.06	neisseria PilC domain-containing protein [Methyloglobulus morosus]
gi|404263197	95	24702	2	2	1	1	0.14	nicotinate-nucleotide--dimethylbenzimidazole phosphoribosyltransferase [Bradyrhizobium sp. CCGE-LA001]
gi|478733282	67	48526	1	1	1	1	0.07	nitrite oxidoreductase, beta subunit, partial [uncultured bacterium]
gi|491129994	58	42286	1	1	1	1	0.08	nitrite reductase [Streptomyces ghanaensis]
gi|30271879	58	10881	1	1	1	1	0.32	nitrogen regulatory protein P-II 2 [Pseudomonas putida]
gi|3057081	72	58671	1	1	1	1	0.06	nitrous oxide reductase [uncultured eubacterium S321195C]
gi|391324454	59	21441	2	2	1	1	0.16	non-heme Fe-binding protein [Pseudomonas syringae]
gi|391324454	58	21441	1	1	1	1	0.16	non-heme Fe-binding protein [Pseudomonas syringae]
gi|586591956	58	422814	1	1	1	1	0.01	non-ribosomal peptide synthetase, partial [Nocardia seriolae N-2927]
gi|563778873	56	32768	2	2	1	1	0.10	NtrC family signal transduction histidine kinase [candidate division SR1 bacterium RAAC1_SR1_1]
gi|490198491	70	39202	4	4	1	1	0.08	nucleoside permease [Hafnia alvei]
gi|490198491	64	39202	3	3	1	1	0.08	nucleoside permease [Hafnia alvei]
gi|494755991	58	26753	1	1	1	1	0.12	nucleotide-diphosphate-sugar epimerase [Streptomyces zinciresistens]
gi|496408730	55	36893	1	1	1	1	0.09	NUDIX family hydrolase [Neisseria wadsworthii]
gi|8050842	42	214810	1	1	1	1	0.02	NysK [Streptomyces noursei ATCC 11455]
gi|495397419	52	20841	1	1	1	1	0.16	O-6-methylguanine DNA methyltransferase [Phyllobacterium sp. YR531]
gi|225616819	150	61294	6	6	1	1	0.11	Oligopeptide-binding protein oppA precursor [Brucella ceti str. Cudo]
gi|225616819	149	61294	6	6	1	1	0.11	Oligopeptide-binding protein oppA precursor [Brucella ceti str. Cudo]
gi|489375661	41	48091	1	1	1	1	0.07	omega amino acid--pyruvate aminotransferase [Pseudomonas stutzeri]
gi|76789924	60	40476	1	1	1	1	0.08	OmpA family protein [Riemerella anatipestifer]
gi|489133315	73	34522	2	2	1	1	0.10	OmpA/MotB protein [Sphingopyxis sp. MC1]
gi|489133315	66	34522	2	2	1	1	0.10	OmpA/MotB protein [Sphingopyxis sp. MC1]
gi|497812433	77	30450	1	1	1	1	0.11	OmpA-family protein [Sphingomonas sp. KC8]
gi|495403809	65	87522	1	1	1	1	0.04	organic solvent tolerance protein OstA [Phyllobacterium sp. YR531]
gi|564812426	70	21658	2	2	1	1	0.16	orotidine 5'-phosphate decarboxylase [Lactobacillus equi]
gi|490789693	44	42514	1	1	1	1	0.08	O-succinylhomoserine sulfhydrylase [Acinetobacter bohemicus]
gi|502625119	55	278980	1	1	1	1	0.01	outer membrane autotransporter barrel domain-containing protein [Sebaldella termitidis]
gi|490768983	97	38785	2	2	1	1	0.09	outer membrane protein (porin) [Ralstonia pickettii]
gi|7532784	146	40090	5	5	1	1	0.17	outer membrane protein [Acinetobacter sp.]
gi|7532784	120	40090	3	3	2	2	0.27	outer membrane protein [Acinetobacter sp.]
gi|967990	120	37729	2	2	1	1	0.09	outer membrane protein [Burkholderia cepacia]
gi|967990	111	37729	2	2	1	1	0.09	outer membrane protein [Burkholderia cepacia]
gi|967990	135	37729	3	3	1	1	0.09	outer membrane protein [Burkholderia cepacia]
gi|490285302	55	42972	1	1	1	1	0.08	Outer membrane protein [Nitrosospira sp. APG3]
gi|2251192	69	17933	2	2	1	1	0.41	outer membrane protein [Pseudomonas aeruginosa]
gi|490785803	115	37347	4	4	2	2	0.29	outer membrane protein omp38 [Acinetobacter bohemicus]
gi|505073124	61	66246	1	1	1	1	0.05	Outer membrane vitamin B12 receptor BtuB [Thioalkalivibrio nitratireducens]
gi|489900937	155	101728	4	4	1	1	0.03	oxidoreductase [Arthrobacter globiformis]
gi|489900937	87	101728	2	2	1	1	0.03	oxidoreductase [Arthrobacter globiformis]
gi|490328230	68	35580	3	3	2	2	0.19	oxidoreductase [Bifidobacterium animalis]
gi|495740061	62	33837	2	2	1	1	0.10	oxidoreductase [Flavobacterium sp. F52]
gi|493884009	58	39046	1	1	1	1	0.08	oxidoreductase [Planococcus antarcticus]
gi|664046905	65	47238	1	1	1	1	0.07	oxidoreductase [Streptomyces anulatus]
gi|633409893	56	98075	1	1	1	1	0.03	oxoglutarate dehydrogenase (succinyl-transferring), E1 component, partial [Bordetella bronchiseptica E010]
gi|633409893	58	98075	1	1	1	1	0.03	oxoglutarate dehydrogenase (succinyl-transferring), E1 component, partial [Bordetella bronchiseptica E010]
gi|633409893	59	98075	1	1	1	1	0.03	oxoglutarate dehydrogenase (succinyl-transferring), E1 component, partial [Bordetella bronchiseptica E010]
gi|503030464	78	29540	2	2	1	1	0.11	pantothenate kinase [Prevotella melaninogenica]
gi|503030464	66	29540	2	2	1	1	0.11	pantothenate kinase [Prevotella melaninogenica]
gi|306921967	62	45477	1	1	1	1	0.07	particulate methane monooxygenase B-subunit [Methylovulum miyakonense HT12]
gi|667804276	59	52609	1	1	1	1	0.06	patatin [Cystobacter violaceus Cb vi76]
gi|505018014	60	113376	1	1	1	1	0.03	PBS lyase HEAT domain-containing protein repeat-containing protein [Crinalium epipsammum]
gi|13324646	55	31035	1	1	1	1	0.11	Peb1 [Streptococcus thermophilus]
gi|499263303	58	78182	1	1	1	1	0.04	penicillin-binding protein [Methylococcus capsulatus]
gi|499263303	59	78182	1	1	1	1	0.04	penicillin-binding protein [Methylococcus capsulatus]
gi|325526769	62	11037	2	2	1	1	0.31	penicillin-binding protein 1C [Burkholderia sp. TJI49]
gi|496242708	59	28699	1	1	1	1	0.12	peptidase [Halomonas sp. HAL1]
gi|493947768	86	53712	1	1	1	1	0.06	peptidase [Methylobacter tundripaludum]
gi|489226306	57	47385	1	1	1	1	0.07	peptidase [Pseudomonas aeruginosa]
gi|489374987	48	11254	1	1	1	1	0.31	peptidase [Pseudomonas stutzeri]
gi|504701575	48	50164	2	2	1	1	0.07	peptidase [secondary endosymbiont of Heteropsylla cubana]
gi|497166819	57	29695	1	1	1	1	0.11	Peptidase C13 family [Microvirga lotononidis]
gi|489526231	53	51363	1	1	1	1	0.06	peptidase M20 [Peptoclostridium difficile]
gi|488740908	69	58302	2	2	1	1	0.06	peptidase M23 [Bergeyella zoohelcum]
gi|488740908	61	58302	1	1	1	1	0.06	peptidase M23 [Bergeyella zoohelcum]
gi|664154163	65	26479	2	2	1	1	0.13	peptidase M23B [Streptomyces globisporus]
gi|495498930	51	62940	1	1	1	1	0.05	peptidase M28 [Rheinheimera nanhaiensis]
gi|490706737	63	73574	1	1	1	1	0.04	peptidase M41 [Polaribacter irgensii]
gi|490706737	61	73574	1	1	1	1	0.04	peptidase M41 [Polaribacter irgensii]
gi|503842155	63	59034	4	4	1	1	0.06	peptidase S10 [Sphingobium sp. SYK-6]
gi|503842155	59	59034	2	2	1	1	0.06	peptidase S10 [Sphingobium sp. SYK-6]
gi|496011406	40	65290	1	1	1	1	0.05	peptidase S15 [Streptomyces sp. Mg1]
gi|495483891	96	61105	1	1	1	1	0.05	peptide ABC transporter [Roseobacter sp. SK209-2-6]
gi|657303754	95	63831	3	3	2	2	0.11	peptide ABC transporter [SAR324 cluster bacterium SCGC AAA001-C10]
gi|495450144	64	58232	1	1	1	1	0.06	peptide ABC transporter substrate-binding protein [Bacillus sp. B14905]
gi|504245288	73	64952	1	1	1	1	0.05	peptide ABC transporter substrate-binding protein [Caldilinea aerophila]
gi|504245895	58	74328	1	1	1	1	0.04	peptide ABC transporter substrate-binding protein [Caldilinea aerophila]
gi|504245288	64	64952	2	2	1	1	0.05	peptide ABC transporter substrate-binding protein [Caldilinea aerophila]
gi|490203611	73	65829	2	2	1	1	0.05	peptide ABC transporter substrate-binding protein [Thermosipho africanus]
gi|489599839	61	36478	1	1	1	1	0.09	peptide methionine sulfoxide reductase MsrB [[Clostridium] symbiosum]
gi|495155194	59	60096	1	1	1	1	0.05	peptide transporter [Herbaspirillum sp. CF444]
gi|495155194	72	60096	1	1	1	1	0.05	peptide transporter [Herbaspirillum sp. CF444]
gi|658527974	62	43653	2	2	1	1	0.08	peptidoglycan hydrolase [Saccharopolyspora rectivirgula]
gi|503496832	64	21205	1	1	1	1	0.16	peptidyl-tRNA hydrolase [Verrucosispora maris]
gi|505150822	60	41611	1	1	1	1	0.08	Permease [Desulfovibrio hydrothermalis]
gi|505150822	70	41611	4	4	1	1	0.08	Permease [Desulfovibrio hydrothermalis]
gi|496004917	61	11848	2	2	1	1	0.29	PF10823 family protein [Actinomyces massiliensis]
gi|488813150	58	45654	1	1	1	1	0.07	PF13372 domain protein [Leptospira borgpetersenii]
gi|488813150	61	45654	1	1	1	1	0.07	PF13372 domain protein [Leptospira borgpetersenii]
gi|488813150	72	45654	3	3	1	1	0.07	PF13372 domain protein [Leptospira borgpetersenii]
gi|640660147	38	99007	1	1	1	1	0.03	phage infection protein [Lactobacillus paralimentarius]
gi|489674500	55	44603	1	1	1	1	0.07	phage integrase [Lactobacillus casei]
gi|489674500	65	44603	1	1	1	1	0.07	phage integrase [Lactobacillus casei]
gi|505186085	45	27861	1	1	1	1	0.12	phage integrase family protein [Pseudomonas poae]
gi|501053086	66	352360	3	3	1	1	0.01	phage minor structural protein [Yersinia pseudotuberculosis]
gi|501053086	58	352360	1	1	1	1	0.01	phage minor structural protein [Yersinia pseudotuberculosis]
gi|501053086	60	352360	3	3	1	1	0.01	phage minor structural protein [Yersinia pseudotuberculosis]
gi|684610399	65	71789	2	2	1	1	0.05	phage recombination related exonuclease [Vibrio maritimus]
gi|684610399	58	71789	1	1	1	1	0.05	phage recombination related exonuclease [Vibrio maritimus]
gi|498160018	85	42182	2	2	1	1	0.08	phage tail protein [Streptomyces somaliensis]
gi|498160018	65	42182	1	1	1	1	0.08	phage tail protein [Streptomyces somaliensis]
gi|630949782	96	25959	2	2	1	1	0.13	phage/plasmid primase, partial [Hyphomonas polymorpha PS728]
gi|498229042	75	86369	1	1	1	1	0.04	phosphatase [Sphingomonas elodea]
gi|499631201	183	47190	5	5	2	2	0.14	phosphatase [Thiobacillus denitrificans]
gi|499631201	37	47190	1	1	1	1	0.07	phosphatase [Thiobacillus denitrificans]
gi|499631201	227	47190	5	5	2	2	0.14	phosphatase [Thiobacillus denitrificans]
gi|588271357	49	36560	1	1	1	1	0.09	phosphate ABC transporter permease [Nesterenkonia sp. AN1]
gi|657939547	111	36520	2	2	2	2	0.19	phosphate ABC transporter substrate-binding protein [alpha proteobacterium Mf 1.05b.01]
gi|504191107	61	34338	1	1	1	1	0.10	phosphate ABC transporter substrate-binding protein [Blastococcus saxobsidens]
gi|496110419	137	35034	2	2	2	2	0.20	phosphate ABC transporter substrate-binding protein [Mesorhizobium alhagi]
gi|496110419	127	35034	3	3	2	2	0.20	phosphate ABC transporter substrate-binding protein [Mesorhizobium alhagi]
gi|499630914	71	35321	1	1	1	1	0.09	phosphate ABC transporter substrate-binding protein [Thiobacillus denitrificans]
gi|499630914	68	35321	1	1	1	1	0.09	phosphate ABC transporter substrate-binding protein [Thiobacillus denitrificans]
gi|493335990	25	60554	1	1	1	1	0.05	phosphate acetyltransferase [Scardovia inopinata]
gi|518126327	61	38979	2	2	1	1	0.08	phosphate acyltransferase [Phaeobacter gallaeciensis]
gi|518126327	86	38979	4	4	1	1	0.08	phosphate acyltransferase [Phaeobacter gallaeciensis]
gi|504517274	67	34138	2	2	1	1	0.10	phosphate-binding protein [Methylophaga frappieri]
gi|495445325	74	42100	2	2	1	1	0.08	phosphate-selective porin O and P [Marinobacter manganoxydans]
gi|495445325	72	42100	1	1	1	1	0.08	phosphate-selective porin O and P [Marinobacter manganoxydans]
gi|656322082	60	59402	2	2	1	1	0.06	phosphoglucomutase [Paraoerskovia marina]
gi|652749505	64	29104	1	1	1	1	0.11	phosphoglycerate mutase [Lysobacter defluvii]
gi|654580314	64	65752	1	1	1	1	0.05	phosphomannomutase [Cellulomonas sp. URHE0023]
gi|653406173	60	26145	1	1	1	1	0.13	phosphonate metabolism protein [Bradyrhizobium sp. Ec3.3]
gi|496506931	65	18403	2	2	1	1	0.18	phosphopantetheine adenylyltransferase [Oribacterium sp. oral taxon 078]
gi|489958995	65	52055	1	1	1	1	0.06	phosphoribosylamine--glycine ligase [Enterobacter cloacae]
gi|518497973	52	43284	1	1	1	1	0.08	phosphoribosylaminoimidazole carboxylase [Eudoraea adriatica]
gi|489391207	37	16960	1	1	1	1	0.20	phosphoribosylaminoimidazole carboxylase catalytic subunit [Pseudomonas stutzeri]
gi|489391207	57	16960	2	2	2	2	0.44	phosphoribosylaminoimidazole carboxylase catalytic subunit [Pseudomonas stutzeri]
gi|446232017	140	15541	5	5	3	3	0.81	phosphoribosylaminoimidazole carboxylase mutase subunit, partial [Acinetobacter baumannii]
gi|446232017	98	15541	2	2	1	1	0.22	phosphoribosylaminoimidazole carboxylase mutase subunit, partial [Acinetobacter baumannii]
gi|492898953	56	13375	1	1	1	1	0.26	phosphoribosyl-ATP pyrophosphatase [Burkholderia thailandensis]
gi|588474885	37	79957	1	1	1	1	0.04	phosphoribosylformylglycinamidine synthase [Lactobacillus composti JCM 14202]
gi|330897102	62	23533	2	2	1	1	0.14	phosphoribosylglycinamide formyltransferase [Pseudomonas syringae pv. japonica str. M301072]
gi|330897102	57	23533	1	1	1	1	0.14	phosphoribosylglycinamide formyltransferase [Pseudomonas syringae pv. japonica str. M301072]
gi|653416755	63	33708	1	1	1	1	0.10	pilus assembly protein [Bradyrhizobium sp. Ec3.3]
gi|497180041	52	31701	1	1	1	1	0.10	plasmid partitioning protein ParB [Sporosarcina newyorkensis]
gi|497180041	54	31701	2	2	1	1	0.10	plasmid partitioning protein ParB [Sporosarcina newyorkensis]
gi|492473016	63	67830	1	1	1	1	0.05	poly(R)-hydroxyalkanoic acid synthase [Sagittula stellata]
gi|263511	49	66844	1	1	1	1	0.05	polyhydroxyalkanoic synthase, PHA synthase [Rhodobacter sphaeroides, ATCC 17023, Peptide, 600 aa]
gi|263511	60	66844	2	2	1	1	0.05	polyhydroxyalkanoic synthase, PHA synthase [Rhodobacter sphaeroides, ATCC 17023, Peptide, 600 aa]
gi|499396070	117	18010	4	4	1	1	0.19	polyketide cyclase [Bradyrhizobium diazoefficiens]
gi|499396070	142	18010	6	6	1	1	0.19	polyketide cyclase [Bradyrhizobium diazoefficiens]
gi|499396070	177	18010	8	8	1	1	0.19	polyketide cyclase [Bradyrhizobium diazoefficiens]
gi|654975297	77	19756	2	2	1	1	0.17	polyketide cyclase [Streptomyces sp. GXT6]
gi|654975297	98	19756	4	4	1	1	0.17	polyketide cyclase [Streptomyces sp. GXT6]
gi|654975297	133	19756	8	8	1	1	0.17	polyketide cyclase [Streptomyces sp. GXT6]
gi|494874354	64	53268	1	1	1	1	0.06	polymerase [Bradyrhizobium sp. WSM1253]
gi|494874354	71	53268	1	1	1	1	0.06	polymerase [Bradyrhizobium sp. WSM1253]
gi|517134348	105	53221	3	3	2	2	0.13	polymerase [Bradyrhizobium sp. WSM2793]
gi|547773517	47	26809	2	2	1	1	0.12	polypeptide-transport-associated domain protein FtsQ-type [Eggerthella sp. CAG:209]
gi|488736032	58	50109	1	1	1	1	0.07	polysaccharide biosynthesis protein [Saprospira grandis]
gi|498123922	59	52825	1	1	1	1	0.06	polysaccharide deacetylase [Ruegeria conchae]
gi|503200574	97	42596	4	4	1	1	0.08	porin [Burkholderia rhizoxinica]
gi|503200574	76	42596	1	1	1	1	0.08	porin [Burkholderia rhizoxinica]
gi|503200574	79	42596	1	1	1	1	0.08	porin [Burkholderia rhizoxinica]
gi|493647429	56	33186	1	1	1	1	0.10	porphobilinogen deaminase [Pseudoramibacter alactolyticus]
gi|493530064	59	35493	2	2	1	1	0.09	potassium channel protein [Burkholderia cenocepacia]
gi|497524337	61	209792	2	2	1	1	0.02	predicted calcium-binding protein [Pseudoalteromonas tunicata]
gi|91200320	57	68559	1	1	1	1	0.05	predicted orf [Candidatus Kuenenia stuttgartiensis]
gi|297181610	41	26582	1	1	1	1	0.13	predicted rossmann fold nucleotide-binding protein [uncultured Sphingobacteriales bacterium HF0130_33B19]
gi|297181610	59	26582	2	2	1	1	0.13	predicted rossmann fold nucleotide-binding protein [uncultured Sphingobacteriales bacterium HF0130_33B19]
gi|68304939	65	58237	2	2	1	1	0.06	predicted virulence factor MviN [uncultured bacterium BAC13K9BAC]
gi|494060055	75	44679	1	1	1	1	0.07	probable secreted protein, partial [Roseomonas cervicalis]
gi|654911774	67	49068	3	3	1	1	0.07	propionyl-CoA carboxylase [Burkholderia sp. JPY366]
gi|654911774	60	49068	1	1	1	1	0.07	propionyl-CoA carboxylase [Burkholderia sp. JPY366]
gi|654911774	70	49068	4	4	1	1	0.07	propionyl-CoA carboxylase [Burkholderia sp. JPY366]
gi|503916759	53	49131	1	1	1	1	0.07	propionyl-CoA carboxylase subunit beta [Streptomyces cattleya]
gi|695635474	55	51202	1	1	1	1	0.06	protease [Leclercia adecarboxylata]
gi|489483894	61	15910	1	1	1	1	0.21	protein ArsC [Brevibacillus borstelensis]
gi|495338717	61	18647	1	1	1	1	0.18	Protein hoxT [Methyloversatilis universalis]
gi|495338717	64	18647	1	1	1	1	0.18	Protein hoxT [Methyloversatilis universalis]
gi|492796909	58	29692	1	1	1	1	0.11	protein phosphatase [endosymbiont of Riftia pachyptila]
gi|493650443	67	77262	1	1	1	1	0.04	protein phosphatase [Streptomyces auratus]
gi|497066863	79	37336	2	2	2	2	0.19	protein sphX [Fischerella sp. JSC-11]
gi|488869192	58	37222	1	1	1	1	0.09	Protein sphX [Microcystis aeruginosa]
gi|490507587	105	34529	1	1	1	1	0.10	protein sphX [Pseudomonas mendocina]
gi|345394693	67	5814	1	1	1	1	0.63	protein traW domain protein [Escherichia coli TX1999]
gi|499423265	48	13277	1	1	1	1	0.26	pterin-4-alpha-carbinolamine dehydratase [Nitrosomonas europaea]
gi|488483816	87	64198	12	12	1	1	0.05	PTS fructose transporter subunit IIA [Propionibacterium humerusii]
gi|488483816	78	64198	9	9	1	1	0.05	PTS fructose transporter subunit IIA [Propionibacterium humerusii]
gi|488483816	83	64198	11	11	1	1	0.05	PTS fructose transporter subunit IIA [Propionibacterium humerusii]
gi|492841276	70	27860	2	2	1	1	0.12	purine nucleoside phosphorylase [Desulfovibrio fructosivorans]
gi|492841276	128	27860	4	4	1	1	0.12	purine nucleoside phosphorylase [Desulfovibrio fructosivorans]
gi|602518992	62	38952	1	1	1	1	0.08	putative 6-phosphofructokinase [Mycobacterium vulneris]
gi|108743467	67	60054	2	2	1	1	0.05	putative ABC transporter solute binding lipoprotein [Streptomyces kanamyceticus]
gi|504247353	57	70639	1	1	1	1	0.05	putative ABC transporter substrate binding protein [Caldilinea aerophila]
gi|504246370	61	44825	1	1	1	1	0.07	putative ABC transporter substrate binding protein [Caldilinea aerophila]
gi|144575109	45	122325	1	1	1	1	0.03	putative ATP-binding protein [Mycoplasma synoviae 53]
gi|546656565	46	187083	1	1	1	1	0.02	putative cell division protein FtsK [Ruminococcus sp. CAG:108]
gi|546656565	34	187083	1	1	1	1	0.02	putative cell division protein FtsK [Ruminococcus sp. CAG:108]
gi|546656565	62	187083	2	2	1	1	0.02	putative cell division protein FtsK [Ruminococcus sp. CAG:108]
gi|490194563	56	66516	1	1	1	1	0.05	putative dipeptide ABC transporter, periplasmic dipeptide-binding protein DppA [Hafnia alvei]
gi|317022248	64	37290	1	1	1	1	0.09	putative esterase [uncultured bacterium]
gi|612123284	92	104490	2	2	1	1	0.03	putative ferric siderophore receptor [Novosphingobium resinovorum]
gi|344173760	50	17752	1	1	1	1	0.19	putative fimbrial protein pilin [Ralstonia syzygii R24]
gi|495098179	81	41319	2	2	1	1	0.08	putative gamma-glutamyl ligase [Streptomyces sp. Tu6071]
gi|495098179	83	41319	1	1	1	1	0.08	putative gamma-glutamyl ligase [Streptomyces sp. Tu6071]
gi|307617120	64	143655	2	2	1	1	0.02	putative glycosyl hydrolase [Streptococcus mitis SK321]
gi|307617120	63	143655	2	2	1	1	0.02	putative glycosyl hydrolase [Streptococcus mitis SK321]
gi|494144399	73	47516	2	2	1	1	0.07	putative integral membrane transport protein [Bacillus bataviensis]
gi|494144399	66	47516	1	1	1	1	0.07	putative integral membrane transport protein [Bacillus bataviensis]
gi|545458325	55	51079	1	1	1	1	0.06	putative integrase [Loktanella cinnabarina]
gi|545458325	52	51079	1	1	1	1	0.06	putative integrase [Loktanella cinnabarina]
gi|50346344	128	13737	4	4	2	2	0.94	putative L21 [Leptospira interrogans serovar Pyrogenes]
gi|50346344	96	13737	3	3	1	1	0.25	putative L21 [Leptospira interrogans serovar Pyrogenes]
gi|50346344	186	13737	6	6	3	3	1.43	putative L21 [Leptospira interrogans serovar Pyrogenes]
gi|499123719	64	74427	1	1	1	1	0.04	putative large, multifunctional secreted protein [Cyclobacteriaceae bacterium AK24]
gi|522832487	57	47963	1	1	1	1	0.07	putative maturase protein [Alteromonas macleodii]
gi|522832487	71	47963	2	2	1	1	0.07	putative maturase protein [Alteromonas macleodii]
gi|490834489	27	22028	1	1	1	1	0.15	putative methenyltetrahydrofolate cyclohydrolase [Veillonella parvula]
gi|498008138	50	65822	2	2	1	1	0.05	putative methyl-accepting chemotaxis sensory transducer [Marinobacterium stanieri]
gi|545419911	75	53369	1	1	1	1	0.06	putative nickel ABC transporter, periplasmic nickel-binding protein [Clostridium sp. ATCC 29733]
gi|548321194	58	83547	1	1	1	1	0.04	putative outer membrane protein probably involved in nutrient binding [Prevotella sp. CAG:617]
gi|548321194	56	83547	1	1	1	1	0.04	putative outer membrane protein probably involved in nutrient binding [Prevotella sp. CAG:617]
gi|213385121	56	39419	1	1	1	1	0.08	putative oxidoreductase [Streptomyces griseoviridis]
gi|213385121	68	39419	3	3	1	1	0.08	putative oxidoreductase [Streptomyces griseoviridis]
gi|213385121	67	39419	5	5	1	1	0.08	putative oxidoreductase [Streptomyces griseoviridis]
gi|38679260	63	17396	1	1	1	1	0.19	putative oxidoreductase alpha subunit [Streptomyces sp. K30]
gi|281181712	87	8441	2	2	1	1	0.42	putative periplasmic dipeptide transport protein [Edwardsiella tarda]
gi|281181712	51	8441	1	1	1	1	0.42	putative periplasmic dipeptide transport protein [Edwardsiella tarda]
gi|281181712	111	8441	2	2	1	1	0.42	putative periplasmic dipeptide transport protein [Edwardsiella tarda]
gi|503326485	85	38681	1	1	1	1	0.09	putative phosphate ABC transporter substrate binding protein [Anaerolinea thermophila]
gi|38505503	77	53074	1	1	1	1	0.06	putative porin [Bradyrhizobium sp. ISLU16]
gi|6959518	58	75304	1	1	1	1	0.04	putative receptor precursor [Pseudomonas stutzeri]
gi|6959518	90	75304	2	2	1	1	0.04	putative receptor precursor [Pseudomonas stutzeri]
gi|547738730	64	64986	1	1	1	1	0.05	putative sensor with HAMP domain [Lachnospiraceae bacterium CAG:215]
gi|495917717	56	74391	2	2	1	1	0.04	putative sensory box protein/GGDEF family protein [Cupriavidus sp. HMR-1]
gi|598663231	33	124145	1	1	1	1	0.03	putative sensory histidine kinase [Rubellimicrobium mesophilum DSM 19309]
gi|590104163	43	33876	1	1	1	1	0.10	putative terpenoid synthase [Candidatus Competibacter denitrificans Run_A_D11]
gi|501185624	64	34865	2	2	1	1	0.10	putative Transcriptional regulator-like protein [Candidatus Microthrix parvicella]
gi|503882330	52	45362	1	1	1	1	0.07	putative transposase [Oscillibacter valericigenes]
gi|488931925	65	36117	2	2	1	1	0.09	putative two-component sensor histidine kinase [Peptostreptococcus anaerobius]
gi|512182110	64	28569	1	1	1	1	0.12	putative uncharacterized protein [Clostridium sp. CAG:1024]
gi|547943647	57	26965	3	3	1	1	0.12	putative uncharacterized protein [Clostridium sp. CAG:299]
gi|547943647	57	26965	2	2	1	1	0.12	putative uncharacterized protein [Clostridium sp. CAG:299]
gi|547943647	56	26965	1	1	1	1	0.12	putative uncharacterized protein [Clostridium sp. CAG:299]
gi|547770785	82	470365	2	2	1	1	0.01	putative uncharacterized protein [Clostridium sp. CAG:575]
gi|547770785	77	470365	1	1	1	1	0.01	putative uncharacterized protein [Clostridium sp. CAG:575]
gi|548131831	92	44836	7	7	1	1	0.07	putative uncharacterized protein [Dialister sp. CAG:357]
gi|548131831	62	44836	2	2	1	1	0.07	putative uncharacterized protein [Dialister sp. CAG:357]
gi|547246615	56	43496	1	1	1	1	0.08	putative uncharacterized protein [Eubacterium sp. CAG:603]
gi|547246615	52	43496	1	1	1	1	0.08	putative uncharacterized protein [Eubacterium sp. CAG:603]
gi|545590024	63	45921	1	1	1	1	0.07	putative uncharacterized protein [Phascolarctobacterium sp. CAG:207]
gi|545590024	61	45921	1	1	1	1	0.07	putative uncharacterized protein [Phascolarctobacterium sp. CAG:207]
gi|547513156	77	16314	2	2	1	1	0.21	putative uncharacterized protein [Prevotella sp. CAG:5226]
gi|547513156	69	16314	1	1	1	1	0.21	putative uncharacterized protein [Prevotella sp. CAG:5226]
gi|547513156	78	16314	3	3	1	1	0.21	putative uncharacterized protein [Prevotella sp. CAG:5226]
gi|547914642	66	45205	2	2	1	1	0.07	putative uncharacterized protein [Prevotella sp. CAG:592]
gi|547914642	62	45205	1	1	1	1	0.07	putative uncharacterized protein [Prevotella sp. CAG:592]
gi|676257077	42	32539	1	1	1	1	0.10	putative uncharacterized protein [Pseudomonas sp. StFLB209]
gi|566083170	61	24998	1	1	1	1	0.13	putative xanthine dehydrogenase accessory factor [Bordetella pertussis]
gi|557678746	27	42962	1	1	1	1	0.08	Putrescine transport ATP-binding protein PotG [Lutibaculum baratangense]
gi|485211727	61	35752	1	1	1	1	0.09	Pyridoxal phosphate-dependent enzyme, D-cysteine desulfhydrase family [Salmonella enterica subsp. enterica serovar Agona str. 20.H.06]
gi|648410920	68	26804	2	2	1	1	0.12	Pyrroline-5-carboxylate reductase [Pleurocapsa sp. PCC 7319]
gi|648410920	56	26804	1	1	1	1	0.12	Pyrroline-5-carboxylate reductase [Pleurocapsa sp. PCC 7319]
gi|512548593	60	62270	2	2	1	1	0.05	pyruvate/2-ketoisovalerate family 2-oxoacid:acceptor oxidoreductase, delta subunit [Actinomyces europaeus]
gi|493859467	94	64122	3	3	1	1	0.05	pyruvate-flavodoxin oxidoreductase, partial [Leptotrichia goodfellowii]
gi|493859467	83	64122	2	2	1	1	0.05	pyruvate-flavodoxin oxidoreductase, partial [Leptotrichia goodfellowii]
gi|493859467	101	64122	3	3	1	1	0.05	pyruvate-flavodoxin oxidoreductase, partial [Leptotrichia goodfellowii]
gi|489392338	88	66896	4	4	3	3	0.15	quinoprotein alcohol dehydrogenase [Pseudomonas stutzeri]
gi|500262513	169	80431	7	7	6	6	0.27	quinoprotein ethanol dehydrogenase [Pseudomonas stutzeri]
gi|499672986	57	43963	1	1	1	1	0.08	radical SAM protein [Burkholderia lata]
gi|506288316	70	30707	2	2	1	1	0.11	radical SAM protein [Pedobacter heparinus]
gi|506288316	73	30707	2	2	1	1	0.11	radical SAM protein [Pedobacter heparinus]
gi|506288316	64	30707	1	1	1	1	0.11	radical SAM protein [Pedobacter heparinus]
gi|302595937	62	64930	1	1	1	1	0.05	RecName: Full=AAA ATPase forming ring-shaped complexes {ECO:0000255|HAMAP-Rule:MF_02112}; Short=ARC {ECO:0000255|HAMAP-Rule:MF_02112} [Rothia mucilaginosa DY-18]
gi|114524	61	54997	1	1	1	1	0.06	RecName: Full=ATP synthase subunit alpha {ECO:0000255|HAMAP-Rule:MF_01346} {ECO:0000255|HAMAP-Rule:MF_01346}; AltName: Full=ATP synthase F1 sector subunit alpha {ECO:0000255|HAMAP-Rule:MF_01346}; AltName: Full=F-ATPase subunit alpha {ECO:0000255|HAM
gi|134035392	176	74698	4	4	3	3	0.14	RecName: Full=Bifunctional polymyxin resistance protein ArnA {ECO:0000255|HAMAP-Rule:MF_01166}; Includes: RecName: Full=UDP-4-amino-4-deoxy-L-arabinose formyltransferase {ECO:0000255|HAMAP-Rule:MF_01166} {ECO:0000255|HAMAP-Rule:MF_01166}; AltName: F
gi|114890	58	141390	2	2	1	1	0.02	RecName: Full=Cellulose synthase operon protein C; Flags: Precursor [Komagataeibacter xylinus]
gi|114890	62	141390	2	2	1	1	0.02	RecName: Full=Cellulose synthase operon protein C; Flags: Precursor [Komagataeibacter xylinus]
gi|6647532	56	70942	1	1	1	1	0.05	RecName: Full=DNA gyrase subunit B {ECO:0000255|HAMAP-Rule:MF_01898} {ECO:0000255|HAMAP-Rule:MF_01898} [Borrelia hermsii]
gi|119213	126	44822	2	2	1	1	0.07	RecName: Full=Elongation factor Tu {ECO:0000255|HAMAP-Rule:MF_00118}; Short=EF-Tu {ECO:0000255|HAMAP-Rule:MF_00118} [Arthrospira platensis]
gi|2828519	143	17952	5	5	1	1	0.19	RecName: Full=Ferric uptake regulation protein; Short=Ferric uptake regulator [Klebsiella pneumoniae]
gi|120682	91	35874	2	2	1	1	0.09	RecName: Full=Glyceraldehyde-3-phosphate dehydrogenase; Short=GAPDH [Bacillus coagulans]
gi|116248116	65	36504	1	1	1	1	0.09	RecName: Full=Ketol-acid reductoisomerase {ECO:0000255|HAMAP-Rule:MF_00435} {ECO:0000255|HAMAP-Rule:MF_00435}; AltName: Full=Acetohydroxy-acid isomeroreductase {ECO:0000255|HAMAP-Rule:MF_00435}; AltName: Full=Alpha-keto-beta-hydroxylacyl reductoisom
gi|75415543	55	184616	1	1	1	1	0.02	RecName: Full=Serine-aspartate repeat-containing protein F; Flags: Precursor [Staphylococcus epidermidis]
gi|3334368	54	63918	1	1	1	1	0.05	RecName: Full=Streptolysin O; AltName: Full=Thiol-activated cytolysin; Flags: Precursor [Streptococcus canis]
gi|2501321	92	24460	2	2	1	1	0.14	RecName: Full=Triosephosphate isomerase; Short=TIM; AltName: Full=Triose-phosphate isomerase, partial [Rhizobium etli CFN 42]
gi|499664878	57	36733	1	1	1	1	0.09	replication protein B [Xanthomonas euvesicatoria]
[truncated: 297 more rows]

## Sheet: Kerogen IV.2
Accession	Score	Mass	Matches	Match(sig)	Sequences	Seq(sig)	emPAI	Description
gi|446081568	56	36038	1	1	1	1	0.12	16S rRNA methyltransferase [Streptococcus oralis]
gi|341820981	56	33908	1	1	1	1	0.13	2-dehydropantoate 2-reductase [Weissella thailandensis fsh4-2]
gi|653253655	61	9217	1	1	1	1	0.56	30S ribosomal protein S16 [Dechloromonas agitata]
gi|653251275	81	17544	2	2	2	2	0.61	30S ribosomal protein S7 [Dechloromonas agitata]
gi|495336968	100	17582	2	2	2	2	0.61	30S ribosomal protein S7 [Methyloversatilis universalis]
gi|489258035	102	30459	11	11	1	1	0.32	3-hydroxyacyl-CoA dehydrogenase [Brevundimonas diminuta]
gi|499606633	34	26288	1	1	1	1	0.17	3-ketoacyl-ACP reductase [Dechloromonas aromatica]
gi|501042658	44	43480	1	1	1	1	0.10	3-phosphoglycerate dehydrogenase [Bacillus cytotoxicus]
gi|490348021	45	42942	1	1	1	1	0.10	3-phosphoglycerate dehydrogenase [Streptococcus criceti]
gi|653251281	58	23862	1	1	1	1	0.19	50S ribosomal protein L1 [Dechloromonas agitata]
gi|495336963	59	18680	1	1	1	1	0.25	50S ribosomal protein L10 [Methyloversatilis universalis]
gi|406999949	75	15411	1	1	1	1	0.31	50S ribosomal protein L16 [uncultured bacterium]
gi|495337018	89	12641	2	2	2	2	0.92	50S ribosomal protein L17 [Methyloversatilis universalis]
gi|489149685	77	12155	1	1	1	1	0.40	50S ribosomal protein L22 [Comamonas testosteroni]
gi|516890820	58	8804	2	2	2	2	1.53	50S ribosomal protein L28 [Leeia oryzae]
gi|499605354	70	23093	1	1	1	1	0.20	50S ribosomal protein L4 [Dechloromonas aromatica]
gi|499631880	67	15825	1	1	1	1	0.30	50S ribosomal protein L9 [Thiobacillus denitrificans]
gi|260219936	94	57247	3	3	3	3	0.25	60 kDa chaperonin [Curvibacter putative symbiont of Hydra magnipapillata]
gi|501586803	73	39427	1	1	1	1	0.11	ABC transporter [Methylocella silvestris]
gi|518448846	47	26114	1	1	1	1	0.17	ABC transporter [Pseudoclavibacter faecalis]
gi|499174335	61	30085	1	1	1	1	0.15	ABC transporter ATP-binding protein [Synechocystis sp. PCC 6803]
gi|492928105	35	29559	1	1	1	1	0.15	ABC transporter permease [Burkholderia graminis]
gi|551363784	112	39932	3	3	3	3	0.37	ABC transporter substrate-binding protein [Ideonella sp. B508-1]
gi|92112099	136	78277	4	4	3	3	0.18	acetone carboxylase beta subunit [Azoarcus communis]
gi|495334730	67	87507	2	2	2	2	0.10	acetone carboxylase subunit alpha [Methyloversatilis universalis]
gi|495334732	125	19967	3	3	2	2	0.87	acetone carboxylase subunit gamma [Methyloversatilis universalis]
gi|499850271	67	40115	1	1	1	1	0.11	acetyl-CoA acetyltransferase [Deinococcus geothermalis]
gi|591276484	82	38740	6	6	1	1	0.11	acetylglutamate semialdehyde dehydrogenase [Bacillus sp. TS-2]
gi|488811261	66	60462	1	1	1	1	0.07	actetate permease [Rhodobacter sphaeroides]
gi|497238267	48	8610	1	1	1	1	0.60	acyl carrier protein [Burkholderiales bacterium JOSHI_001]
gi|518406973	73	54813	3	3	3	3	0.26	aldehyde dehydrogenase [Curvibacter lanceolatus]
gi|491083632	90	35505	6	6	1	1	0.13	Aldo-keto reductase [Streptomyces mobaraensis]
gi|495449313	73	60492	1	1	1	1	0.07	alkaline phosphatase [Marinobacter manganoxydans]
gi|493948305	60	58614	1	1	1	1	0.07	alkaline phosphatase [Methylobacter tundripaludum]
gi|496334480	71	41082	1	1	1	1	0.11	alkaline phosphatase [Pseudomonas chlororaphis]
gi|653252231	95	20800	3	3	3	3	0.83	alkyl hydroperoxide reductase [Dechloromonas agitata]
gi|612091511	45	59690	1	1	1	1	0.07	Alpha,alpha-trehalase [Sphingomonas sp. RIT328]
gi|602541864	57	52866	1	1	1	1	0.08	alpha/beta hydrolase [Mycobacterium mageritense DSM 44476]
gi|493558992	86	102893	4	4	1	1	0.04	amino acid adenylation enzyme/thioester reductase family protein [Xenococcus sp. PCC 7305]
gi|499861960	59	27307	1	1	1	1	0.17	arginine ABC transporter ATP-binding protein [Sphingopyxis alaskensis]
gi|563175059	53	6387	1	1	1	1	0.86	ArsR family transcriptional regulator [Mesorhizobium sp. LNHC209A00]
gi|497052497	52	35738	1	1	1	1	0.12	ATP synthase F0 subunit A [Parvimonas sp. oral taxon 393]
gi|499609096	105	17177	3	3	3	3	1.06	ATP synthase subunit B [Dechloromonas aromatica]
gi|496354858	57	23022	1	1	1	1	0.20	ATP synthase, subunit E [Clostridium sp. MSTE9]
gi|493660224	56	188037	1	1	1	1	0.02	ATPase AAA [Bradyrhizobium sp. ORS 285]
gi|300416162	42	106361	1	1	1	1	0.04	ATPase family associated with various cellular activities (AAA) [Escherichia coli MS 115-1]
gi|494016719	30	64144	1	1	1	1	0.07	ATP-binding protein [Vibrio coralliilyticus]
gi|504086022	42	114861	1	1	1	1	0.04	ATP-dependent helicase [Corynebacterium diphtheriae]
gi|501238086	59	72768	1	1	1	1	0.06	ATP-dependent helicase [Francisella philomiragia]
gi|655951794	82	18861	2	2	2	2	0.55	bacterioferritin [Azonexus hydrophilus]
gi|517221890	71	18424	1	1	1	1	0.25	bacterioferritin [Methyloversatilis sp. NVD]
gi|499607872	66	35803	1	1	1	1	0.12	beta-lactamase [Dechloromonas aromatica]
gi|283480587	74	45092	1	1	1	1	0.10	butanol dehydrogenase [Thermoanaerobacter mathranii]
gi|488898779	60	29715	1	1	1	1	0.15	cation transporter [Nitrosococcus oceani]
gi|653251020	62	23668	1	1	1	1	0.19	cbb3-type cytochrome c oxidase subunit II [Dechloromonas agitata]
gi|495451832	83	63540	1	1	1	1	0.07	cell division protein [Marinobacter manganoxydans]
gi|494485	122	12722	4	4	2	2	0.91	Chain A, Crystal Structure And Ligand Binding Studies Of A Screened Peptide Complexed With Streptavidin
gi|283806952	65	11016	1	1	1	1	0.45	Chain A, Ethanolamine Utilization Microcompartment Shell Subunit, Eutm
gi|116667446	57	12957	1	1	1	1	0.37	Chain L, Structure Of The 50s Subunit Of A Pre-Translocational E. Coli Ribosome Obtained By Fitting Atomic Models For Rna And Protein Components Into Cryo-Em Map Emd-1056
gi|602749070	61	116172	1	1	1	1	0.04	CheA signal transduction histidine kinase, partial [uncultured bacterium lac111]
gi|415684	62	5835	1	1	1	1	0.97	chemoreceptor, partial [Desulfovibrio vulgaris str. Hildenborough]
gi|651325584	40	39461	1	1	1	1	0.11	chorismate synthase [Aequorivita capsosiphonis]
gi|259041202	55	44956	1	1	1	1	0.10	citrate (Si)-synthase [Klebsiella pneumoniae subsp. rhinoscleromatis ATCC 13884]
gi|685194553	63	28217	2	2	1	1	0.16	cobB/CobQ-like glutamine amidotransferase domain protein [Corynebacterium sp. ATCC 6931]
gi|256955771	57	16471	1	1	1	1	0.29	conserved hypothetical protein [Enterococcus faecalis HIP11704]
gi|692386329	68	9881	2	2	1	1	0.51	copper resistance protein CopK [Comamonas testosteroni]
gi|653349352	46	15915	1	1	1	1	0.30	cyanoglobin [Rhodococcus sp. UNC363MFTsu5.1]
gi|489720367	74	316398	1	1	1	1	0.01	cyclic beta 1-2 glucan synthetase [Acetobacter pasteurianus]
gi|504001995	71	85014	2	2	2	2	0.10	cytochrome C [Azospira oryzae]
gi|499606054	74	63463	2	2	2	2	0.14	dehydrogenase [Dechloromonas aromatica]
gi|647283318	36	29921	1	1	1	1	0.15	DeoR faimly transcriptional regulator [Atopobacter phocae]
gi|654146184	60	49154	1	1	1	1	0.09	diacetylchitobiose-6-phosphate hydrolase [Tuberibacillus calidus]
gi|493896016	56	26695	1	1	1	1	0.17	dihydrodipicolinate reductase [Dysgonomonas mossii]
gi|325526457	53	30355	1	1	1	1	0.15	dihydrolipoamide succinyltransferase [Burkholderia sp. TJI49]
gi|490372603	55	31907	1	1	1	1	0.14	dihydrolipoamide succinyltransferase [Thauera sp. 63]
gi|501383826	59	72306	1	1	1	1	0.06	DNA ligase [Elusimicrobium minutum]
gi|498448441	58	50319	2	2	1	1	0.09	DNA polymerase V [Enterococcus asini]
gi|667804516	58	12236	1	1	1	1	0.40	DNA-binding protein [Cystobacter violaceus Cb vi76]
gi|653252235	106	9983	2	2	2	2	1.26	DNA-binding protein [Dechloromonas agitata]
gi|497542066	54	18044	1	1	1	1	0.26	DNA-binding protein [Rubrivivax benzoatilyticus]
gi|21702608	40	77687	1	1	1	1	0.06	elongation factor G [Candidatus Tremblaya princeps]
gi|430003418	146	42787	3	3	3	3	0.34	Elongation factor Tu (EF-Tu) [Rhizobium sp.]
gi|551348800	130	43182	3	3	3	3	0.34	elongation factor Tu [Arenimonas oryziterrae]
gi|640442417	222	42845	6	6	5	5	0.80	elongation factor Tu [Burkholderia andropogonis]
gi|502019767	118	43073	4	4	4	4	0.48	elongation factor Tu [Laribacter hongkongensis]
gi|519007783	118	11489	2	2	2	2	1.04	endonuclease [Methyloversatilis universalis]
gi|505207355	121	47163	1	1	1	1	0.09	enolase Eno [Clostridium saccharoperbutylacetonicum]
gi|488143691	48	35484	1	1	1	1	0.13	enterobactin ABC transporter permease [Neisseria meningitidis]
gi|503210202	64	105968	1	1	1	1	0.04	excinuclease ABC subunit A [Paludibacter propionicigenes]
gi|490023495	58	122069	1	1	1	1	0.04	exodeoxyribonuclease V subunit beta [Mycobacterium thermoresistibile]
gi|491321484	120	97070	5	5	1	1	0.04	Exonuclease SbcC [Yersinia enterocolitica]
gi|499609100	125	50605	5	5	4	4	0.39	F0F1 ATP synthase subunit beta [Dechloromonas aromatica]
gi|499605631	55	19814	1	1	1	1	0.23	ferritin [Dechloromonas aromatica]
gi|517224496	64	17488	1	1	1	1	0.27	ferritin [Methyloversatilis sp. NVD]
gi|648602587	31	14519	1	1	1	1	0.33	flagellar basal-body rod protein FlgB [Saccharibacter floricola]
gi|499729170	69	60321	1	1	1	1	0.07	flagellar hook-associated protein FlgK [Sodalis glossinidius]
gi|495333463	66	40942	1	1	1	1	0.11	Flagellin [Methyloversatilis universalis]
gi|374428665	83	55850	2	2	2	2	0.16	F-type ATP synthase alpha subunit [Hydrogenophilus thermoluteolus]
gi|654296112	46	17935	1	1	1	1	0.26	GCN5 family acetyltransferase [Burkholderia cenocepacia]
gi|500114931	52	43928	1	1	1	1	0.10	general secretion pathway protein L [Shewanella sp. W3-18-1]
gi|326625137	59	72122	1	1	1	1	0.06	ggdef domain/eal domain protein [Salmonella enterica subsp. enterica serovar Dublin str. SD3246]
gi|655363418	41	39979	1	1	1	1	0.11	glutamate 5-kinase [Silanimonas lenta]
gi|655951838	97	52184	3	3	3	3	0.27	glutamine synthetase [Azonexus hydrophilus]
gi|296315656	106	21980	2	2	2	2	0.46	glutamine synthetase [Polynucleobacter necessarius subsp. asymbioticus]
gi|671471672	58	35158	1	1	1	1	0.13	glutamyl-Q tRNA(Asp) ligase [Eubacterium desmolans]
gi|493179020	57	48749	1	1	1	1	0.09	glutathione reductase [Enterobacter cancerogenus]
gi|493470522	55	57835	1	1	1	1	0.08	glycerol-3-phosphate dehydrogenase subunit A [delta proteobacterium NaphS2]
gi|490717329	61	50079	1	1	1	1	0.09	glycerophosphoryl diester phosphodiesterase [Marinobacter nanhaiticus]
gi|504017535	66	42397	2	2	2	2	0.22	glycine/betaine ABC transporter ATPase [Burkholderia sp. YI23]
gi|653252577	94	18420	5	5	4	4	1.46	granule-associated-like protein [Dechloromonas agitata]
gi|653252297	63	19972	1	1	1	1	0.23	granule-associated-like protein [Dechloromonas agitata]
gi|489142554	54	21531	2	2	2	2	0.47	heat shock protein Hsp20 [Comamonas testosteroni]
gi|489372976	93	21480	3	3	3	3	0.79	heat shock protein Hsp20 [Pseudomonas stutzeri]
gi|489505722	42	75593	1	1	1	1	0.06	heat shock protein Hsp90 [Clostridium butyricum]
gi|695838117	55	80386	1	1	1	1	0.05	helicase [Streptomyces griseus]
gi|558547452	38	81920	1	1	1	1	0.05	helicase [Streptomycetaceae bacterium MP113-05]
gi|657347975	40	54176	1	1	1	1	0.08	histidine kinase [Pseudomonas stutzeri]
gi|668945292	87	9176	1	1	1	1	0.56	Histone-like DNA-binding protein [Bosea sp. LC85]
gi|535709	64	8995	1	1	1	1	0.57	HU protein [Pseudomonas aeruginosa]
gi|521999749	64	99412	1	1	1	1	0.04	hypothetical protein [Actinoplanes globisporus]
gi|489899682	82	20360	2	2	2	2	0.51	hypothetical protein [Alcaligenes faecalis]
gi|499555786	103	19005	2	2	2	2	0.55	hypothetical protein [Aromatoleum aromaticum]
gi|493669838	61	48770	1	1	1	1	0.09	hypothetical protein [Arthrospira platensis]
gi|517821421	102	46880	2	2	2	2	0.20	hypothetical protein [Azoarcus toluclasticus]
gi|496416875	66	42819	1	1	1	1	0.10	hypothetical protein [Bacteroides fluxus]
gi|494075986	81	55098	8	8	1	1	0.08	hypothetical protein [Bermanella marisrubri]
gi|497419873	55	51755	1	1	1	1	0.08	hypothetical protein [Bradyrhizobiaceae bacterium SG-6C]
gi|497233974	84	23243	2	2	2	2	0.43	hypothetical protein [Burkholderiales bacterium JOSHI_001]
gi|551035716	85	28192	3	3	1	1	0.16	hypothetical protein [Butyrivibrio sp. AE3009]
gi|651403870	52	19223	1	1	1	1	0.24	hypothetical protein [Butyrivibrio sp. LB2008]
gi|656287850	28	62699	1	1	1	1	0.07	hypothetical protein [Butyrivibrio sp. VCB2006]
gi|648397896	45	41905	1	1	1	1	0.11	hypothetical protein [Candidatus Alistipes marseilloanorexicus]
gi|512709207	74	165910	2	2	1	1	0.03	hypothetical protein [Capnocytophaga sp. oral taxon 336]
gi|496462776	43	11619	1	1	1	1	0.42	hypothetical protein [Clostridium sp. DL-VIII]
gi|503743061	34	62384	1	1	1	1	0.07	hypothetical protein [Clostridium sp. SY8519]
gi|493877065	43	39585	1	1	1	1	0.11	hypothetical protein [Corynebacterium casei]
gi|499605887	47	11792	1	1	1	1	0.42	hypothetical protein [Dechloromonas aromatica]
gi|503609264	57	11613	1	1	1	1	0.42	hypothetical protein [Desulfotomaculum ruminis]
gi|488284969	58	12526	1	1	1	1	0.39	hypothetical protein [Enterococcus faecalis]
gi|498450534	719	15547	85	85	1	1	0.31	hypothetical protein [Enterococcus pallens]
gi|553728660	64	32307	2	2	2	2	0.30	hypothetical protein [Escherichia coli]
gi|503028053	34	10505	1	1	1	1	0.47	hypothetical protein [gamma proteobacterium HdN1]
gi|500473160	79	33344	1	1	1	1	0.13	hypothetical protein [Geobacter uraniireducens]
gi|494639657	81	13435	1	1	1	1	0.36	hypothetical protein [Gluconacetobacter sp. SXCC-1]
gi|489046703	45	26848	1	1	1	1	0.17	hypothetical protein [Helicobacter cinaedi]
gi|516023977	117	42222	4	4	4	4	0.49	hypothetical protein [Herbaspirillum seropedicae]
gi|652464009	98	35369	11	11	1	1	0.13	hypothetical protein [Jeotgalicoccus psychrophilus]
gi|516954700	56	20792	1	1	1	1	0.22	hypothetical protein [Kaistia granuli]
gi|657702402	29	74787	1	1	1	1	0.06	hypothetical protein [Kurthia huakuii]
gi|496566704	54	22886	1	1	1	1	0.20	hypothetical protein [Lachnospiraceae bacterium 1_4_56FAA]
gi|504378896	60	81206	1	1	1	1	0.05	hypothetical protein [Lactobacillus amylovorus]
gi|639447683	57	30569	1	1	1	1	0.15	hypothetical protein [Lactobacillus fabifermentans]
gi|491919210	85	55351	7	7	1	1	0.08	hypothetical protein [Lautropia mirabilis]
gi|491906459	103	21992	3	3	3	3	0.77	hypothetical protein [Massilia timonae]
gi|491917067	93	13117	2	2	2	2	0.88	hypothetical protein [Massilia timonae]
gi|491905399	79	21486	1	1	1	1	0.21	hypothetical protein [Massilia timonae]
gi|491904444	77	19155	1	1	1	1	0.24	hypothetical protein [Massilia timonae]
gi|491909823	74	23920	1	1	1	1	0.19	hypothetical protein [Massilia timonae]
gi|491909407	71	25895	1	1	1	1	0.18	hypothetical protein [Massilia timonae]
gi|491918304	69	13395	1	1	1	1	0.36	hypothetical protein [Massilia timonae]
gi|491918263	65	37505	1	1	1	1	0.12	hypothetical protein [Massilia timonae]
gi|491915280	62	24943	1	1	1	1	0.18	hypothetical protein [Massilia timonae]
gi|491909114	54	14900	1	1	1	1	0.32	hypothetical protein [Massilia timonae]
gi|491916312	47	23325	1	1	1	1	0.20	hypothetical protein [Massilia timonae]
gi|517222156	134	50060	6	6	5	5	0.52	hypothetical protein [Methyloversatilis sp. NVD]
gi|495334205	77	11203	2	2	1	1	0.44	hypothetical protein [Methyloversatilis universalis]
gi|517038830	63	17682	1	1	1	1	0.27	hypothetical protein [Methyloversatilis universalis]
gi|517040634	34	24052	1	1	1	1	0.19	hypothetical protein [Methyloversatilis universalis]
gi|565873269	65	43256	1	1	1	1	0.10	hypothetical protein [Microbacterium sp. TS-1]
gi|491283721	58	43071	1	1	1	1	0.10	hypothetical protein [Mycobacterium rhodesiae]
gi|655020538	48	46746	1	1	1	1	0.09	hypothetical protein [Neptunomonas japonica]
gi|491141761	60	42455	2	2	1	1	0.10	hypothetical protein [Nitrococcus mobilis]
gi|516134821	60	40053	1	1	1	1	0.11	hypothetical protein [Nocardiopsis synnemataformans]
gi|518476272	26	20100	1	1	1	1	0.23	hypothetical protein [Novispirillum itersonii]
gi|654840750	68	55080	1	1	1	1	0.08	hypothetical protein [Oceanobacter kriegii]
gi|656253478	58	22835	1	1	1	1	0.20	hypothetical protein [Oribacterium sp. NK2B42]
gi|516328559	45	40051	2	2	1	1	0.11	hypothetical protein [Oscillatoria sp. PCC 10802]
gi|499676709	74	43163	1	1	1	1	0.10	hypothetical protein [Pelodictyon luteolum]
gi|490479122	54	125434	1	1	1	1	0.03	hypothetical protein [Prevotella buccalis]
gi|488474629	61	57756	1	1	1	1	0.08	hypothetical protein [Propionibacterium acnes]
gi|491062060	52	20859	1	1	1	1	0.22	hypothetical protein [Providencia stuartii]
gi|489182287	51	22554	1	1	1	1	0.20	hypothetical protein [Pseudomonas aeruginosa]
gi|489289445	66	149583	1	1	1	1	0.03	hypothetical protein [Pseudomonas fluorescens]
gi|515905423	59	66145	1	1	1	1	0.07	hypothetical protein [Pseudomonas fluorescens]
gi|516518751	70	28488	1	1	1	1	0.16	hypothetical protein [Pseudomonas fuscovaginae]
gi|544767997	70	24250	6	6	1	1	0.19	hypothetical protein [Ralstonia sp. AU12-08]
gi|497543730	77	35570	1	1	1	1	0.13	hypothetical protein [Rubrivivax benzoatilyticus]
gi|516355809	42	44934	1	1	1	1	0.10	hypothetical protein [Scytonema hofmanni]
gi|647614705	56	55083	1	1	1	1	0.08	hypothetical protein [Shewanella haliotis]
gi|654615729	50	112216	3	3	1	1	0.04	hypothetical protein [Solimonas soli]
gi|501194023	59	203063	1	1	1	1	0.02	hypothetical protein [Sorangium cellulosum]
gi|655912193	62	31157	2	2	1	1	0.14	hypothetical protein [Sporocytophaga myxococcoides]
gi|488365511	49	21142	1	1	1	1	0.22	hypothetical protein [Staphylococcus capitis]
gi|518166225	64	15331	1	1	1	1	0.31	hypothetical protein [Stenotrophomonas maltophilia]
gi|488692161	65	38690	2	2	1	1	0.11	hypothetical protein [Stigmatella aurantiaca]
gi|446728818	50	51303	1	1	1	1	0.09	hypothetical protein [Streptococcus oralis]
gi|529244816	34	26274	1	1	1	1	0.17	hypothetical protein [Streptomyces collinus]
gi|663396015	136	16761	3	3	1	1	0.28	hypothetical protein [Streptomyces purpeofuscus]
gi|664063214	130	6988	13	13	1	1	0.78	hypothetical protein [Streptomyces rimosus]
gi|517389535	54	33543	1	1	1	1	0.13	hypothetical protein [Streptomyces sp. BoleA5]
gi|498212133	59	50351	1	1	1	1	0.09	hypothetical protein [Thermophagus xiamenensis]
gi|297181142	61	10390	1	1	1	1	0.48	hypothetical protein [uncultured Oceanospirillales bacterium HF0070_21F08]
gi|515168087	71	28012	1	1	1	1	0.16	hypothetical protein [Vibrio cyclitrophicus]
gi|515593828	92	77279	2	2	1	1	0.06	hypothetical protein [Vibrio rumoiensis]
gi|517908821	30	25307	1	1	1	1	0.18	hypothetical protein [Yersinia enterocolitica]
gi|407001042	69	11898	1	1	1	1	0.41	hypothetical protein ACD_10C00108G0003 [uncultured bacterium]
gi|406999950	65	29965	1	1	1	1	0.15	hypothetical protein ACD_10C00468G0018 [uncultured bacterium]
gi|406999957	113	11807	3	3	3	3	1.85	hypothetical protein ACD_10C00468G0025 [uncultured bacterium]
gi|406999912	43	48789	1	1	1	1	0.09	hypothetical protein ACD_10C00471G0001 [uncultured bacterium]
gi|406999774	91	18233	1	1	1	1	0.26	hypothetical protein ACD_10C00516G0001, partial [uncultured bacterium]
gi|406999601	70	10736	1	1	1	1	0.46	hypothetical protein ACD_10C00578G0002 [uncultured bacterium]
gi|406999528	107	8743	1	1	1	1	0.59	hypothetical protein ACD_10C00605G0001 [uncultured bacterium]
gi|406986137	60	31991	1	1	1	1	0.14	hypothetical protein ACD_18C00278G0002, partial [uncultured bacterium]
gi|406940128	52	25435	1	1	1	1	0.18	hypothetical protein ACD_45C00490G0001 [uncultured bacterium]
gi|406939705	56	19549	1	1	1	1	0.24	hypothetical protein ACD_45C00615G0003 [uncultured bacterium]
gi|406897213	84	17989	1	1	1	1	0.26	hypothetical protein ACD_73C00797G0003 [uncultured bacterium]
gi|628971182	54	188819	1	1	1	1	0.02	hypothetical protein ATO10_02910 [Actibacterium sp. 22II-S11-z10]
gi|612506606	40	21385	1	1	1	1	0.21	hypothetical protein CH75_19930 [Dyella jiangningensis]
gi|584457764	47	17991	1	1	1	1	0.26	hypothetical protein CM240_2904 [Clostridium sp. M2/40]
gi|656105267	38	118376	1	1	1	1	0.04	hypothetical protein D777_02111 [Marinobacter sp. AK21]
gi|660644510	46	15976	1	1	1	1	0.30	hypothetical protein EL26_01830 [Tumebacillus flagellatus]
gi|575410989	58	29915	1	1	1	1	0.15	hypothetical protein ETSY1_24345 [Candidatus Entotheonella sp. TSY1]
gi|692534111	68	11905	1	1	1	1	0.41	hypothetical protein GS19_17265, partial [Acinetobacter sp. MII]
gi|692533594	58	11392	2	2	2	2	1.05	hypothetical protein GS19_17550, partial [Acinetobacter sp. MII]
gi|459544971	52	30644	1	1	1	1	0.15	hypothetical protein HMPREF1425_00697 [Helicobacter pylori GAM71Ai]
gi|691633805	57	19599	1	1	1	1	0.24	hypothetical protein IA69_26620 [Massilia sp. JS1662]
gi|671226974	55	61487	2	2	1	1	0.07	hypothetical protein IW15_10675 [Chryseobacterium soli]
gi|410000959	58	6215	1	1	1	1	0.90	hypothetical protein LEP1GSC131_0276 [Leptospira kirschneri str. 200802841]
gi|530439111	75	90127	1	1	1	1	0.05	hypothetical protein M529_23080 [Sphingobium ummariense RL-3]
gi|540148459	51	102681	1	1	1	1	0.04	hypothetical protein SEEHRA23_06295 [Salmonella enterica subsp. enterica serovar Heidelberg str. SARA33]
gi|672393932	69	14448	1	1	1	1	0.33	hypothetical protein U14_04816 [bacterium UASB14]
gi|494666267	72	32338	1	1	1	1	0.14	hypothetical protein, partial [Acidiphilium sp. PM]
gi|496573618	95	74494	5	5	2	2	0.12	hypothetical protein, partial [Erysipelotrichaceae bacterium 3_1_53]
gi|446945226	98	24490	1	1	1	1	0.19	hypothetical protein, partial [Escherichia coli]
gi|446619557	55	5239	1	1	1	1	1.13	hypothetical protein, partial [Escherichia coli]
gi|648271262	44	18641	2	2	1	1	0.56	hypothetical protein, partial [Herbaspirillum rubrisubalbicans]
gi|497979074	67	3732	2	2	1	1	1.77	hypothetical protein, partial [Pectobacterium carotovorum]
gi|636934182	60	67701	2	2	1	1	0.06	hypothetical protein, partial [Streptococcus suis]
gi|657307600	61	91842	1	1	1	1	0.05	hypothetical protein, partial [Streptomyces sulphureus]
gi|665961667	56	39978	1	1	1	1	0.11	hypothetical protein, partial [Xanthomonas axonopodis]
gi|495782539	40	97608	1	1	1	1	0.04	Ig domain protein group 2 domain protein [Mucilaginibacter paludis]
gi|547730274	36	69378	1	1	1	1	0.06	ig-like domain-containing surface protein [Ruminococcus sp. CAG:563]
gi|671721436	34	26567	1	1	1	1	0.17	indole-3-glycerol phosphate synthase [Cryobacterium sp. MLB-32]
gi|652479101	65	77936	1	1	1	1	0.06	indolepyruvate ferredoxin oxidoreductase [Inquilinus limosus]
gi|498677952	50	51999	1	1	1	1	0.08	Ion channel family [Salmonella enterica]
gi|6049270	66	48885	1	1	1	1	0.09	isocitrate lyase [Pseudomonas putida]
gi|515135461	60	27577	1	1	1	1	0.16	kinase [Bacillus megaterium]
gi|640596752	53	37516	1	1	1	1	0.12	LacI family transcriptional regulator [Bacillus mannanilyticus]
gi|12746363	70	4779	1	1	1	1	1.27	large subunit ribosomal protein L20 [Xanthomonas campestris]
gi|503160280	75	54895	1	1	1	1	0.08	L-aspartate oxidase [Achromobacter xylosoxidans]
gi|502681867	58	74785	2	2	1	1	0.06	ligand-gated channel [Xanthomonas albilineans]
gi|124261116	43	18323	1	1	1	1	0.25	LSU ribosomal protein L13P [Methylibium petroleiphilum PM1]
gi|490779282	65	35935	1	1	1	1	0.12	LysR family transcriptional regulator [Acinetobacter haemolyticus]
gi|663750691	63	32158	1	1	1	1	0.14	LysR family transcriptional regulator [Phycicoccus jejuensis]
gi|3201828	65	8841	1	1	1	1	0.58	major outer membrane lipoprotein I [Pseudomonas oleovorans]
gi|499513303	57	26924	1	1	1	1	0.17	membrane protein [[Mannheimia] succiniciproducens]
gi|490405235	61	43974	1	1	1	1	0.10	membrane protein [Acinetobacter lwoffii]
gi|491436049	68	34583	1	1	1	1	0.13	membrane protein [Corynebacterium jeikeium]
gi|653251440	143	11129	3	3	2	2	1.09	membrane protein [Dechloromonas agitata]
gi|499605496	49	22974	3	3	3	3	0.72	membrane protein [Dechloromonas aromatica]
gi|495960755	59	83181	1	1	1	1	0.05	membrane protein [Desulfovibrio sp. 3_1_syn3]
gi|519008058	86	26618	4	4	4	4	0.87	membrane protein [Methyloversatilis universalis]
gi|517041570	46	22805	1	1	1	1	0.20	membrane protein [Methyloversatilis universalis]
gi|516058632	47	33169	1	1	1	1	0.13	membrane protein [Micrococcus luteus]
gi|499746871	64	35775	1	1	1	1	0.12	membrane protein [Rhizobium etli]
gi|489076622	46	78671	1	1	1	1	0.06	membrane protein [Streptococcus pyogenes]
gi|664445774	50	33815	1	1	1	1	0.13	MerR family transcriptional regulator [Streptomyces sp. NRRL F-5140]
gi|495339880	37	65794	1	1	1	1	0.07	methanol dehydrogenase [Methyloversatilis universalis]
gi|502780317	48	26052	1	1	1	1	0.17	methyltransferase GidB [Meiothermus ruber]
gi|54310856	76	46332	1	1	1	1	0.10	MnbH [Comamonas sp. JS46]
gi|490329642	47	51491	1	1	1	1	0.09	modification methylase [Bifidobacterium animalis]
gi|515485377	52	24934	1	1	1	1	0.18	molecular chaperone DnaJ [Methylocystis parvus]
gi|501209461	106	57756	3	3	3	3	0.24	molecular chaperone GroEL [Methylobacterium extorquens]
gi|489021082	80	11837	3	3	3	3	1.82	MULTISPECIES: 30S ribosomal protein S10 [Thauera]
gi|489021126	60	13650	1	1	1	1	0.35	MULTISPECIES: 30S ribosomal protein S11 [Thauera]
gi|519008888	60	27831	1	1	1	1	0.16	MULTISPECIES: 30S ribosomal protein S2 [Rhodocyclaceae]
gi|518762327	59	15326	2	2	2	2	0.72	MULTISPECIES: 50S ribosomal protein L15 [Rhodocyclaceae]
gi|488143114	85	13746	2	2	2	2	0.82	MULTISPECIES: 50S ribosomal protein L19 [Neisseria]
gi|518762335	64	7430	1	1	1	1	0.72	MULTISPECIES: 50S ribosomal protein L29 [Rhodocyclaceae]
gi|495337004	49	6717	1	1	1	1	0.81	MULTISPECIES: 50S ribosomal protein L30 [Rhodocyclaceae]
gi|488718438	82	20289	3	3	2	2	0.51	MULTISPECIES: 50S ribosomal protein L5 [Neisseriaceae]
gi|489641034	55	13004	1	1	1	1	0.37	MULTISPECIES: 50S ribosomal protein L7/L12 [Desulfotomaculum]
gi|489632101	55	55369	1	1	1	1	0.08	MULTISPECIES: 6-phospho-beta-glucosidase [Erysipelotrichaceae]
gi|500833861	57	36054	2	2	1	1	0.12	MULTISPECIES: ABC transporter substrate-binding protein [Thermotoga]
gi|489897517	98	8909	1	1	1	1	0.58	MULTISPECIES: acyl carrier protein [Alcaligenes]
gi|518761322	162	17523	5	5	4	4	1.58	MULTISPECIES: aldehyde-activating protein [Rhodocyclaceae]
gi|518760919	94	20657	4	4	4	4	1.24	MULTISPECIES: alkyl hydroperoxide reductase subunit C [Rhodocyclaceae]
gi|493651186	72	7142	1	1	1	1	0.76	MULTISPECIES: cold-shock protein [Streptomyces]
gi|499605379	92	35408	2	2	2	2	0.27	MULTISPECIES: DNA-directed RNA polymerase subunit alpha [Dechloromonas]
gi|518759402	237	19046	7	7	5	5	2.69	MULTISPECIES: granule protein PhaP [Rhodocyclaceae]
gi|500119736	71	11935	1	1	1	1	0.41	MULTISPECIES: hypothetical protein [Acidovorax]
gi|499396942	62	88622	1	1	1	1	0.05	MULTISPECIES: hypothetical protein [Bradyrhizobium]
gi|494600023	57	11043	1	1	1	1	0.45	MULTISPECIES: hypothetical protein [Kamptonema]
gi|647152534	34	26475	1	1	1	1	0.17	MULTISPECIES: hypothetical protein [Psychrobacter]
gi|518762198	268	39016	7	7	6	6	0.91	MULTISPECIES: hypothetical protein [Rhodocyclaceae]
gi|518759672	215	53917	9	9	8	8	0.87	MULTISPECIES: hypothetical protein [Rhodocyclaceae]
gi|490080184	41	6766	1	1	1	1	0.81	MULTISPECIES: hypothetical protein [Streptomyces]
gi|489582196	51	34875	1	1	1	1	0.13	MULTISPECIES: malate dehydrogenase [Xanthomonas]
gi|518758426	101	11621	3	3	3	3	1.88	MULTISPECIES: membrane protein [Rhodocyclaceae]
gi|501096996	94	10780	2	2	2	2	1.14	MULTISPECIES: membrane protein [Serratia]
gi|490838180	126	6729	2	2	2	2	2.27	MULTISPECIES: murein lipoprotein [Yersinia]
gi|491084089	59	15858	2	2	2	2	0.69	MULTISPECIES: peptidoglycan-binding protein LysM [Serratia]
gi|518761198	87	30026	1	1	1	1	0.15	MULTISPECIES: peptidyl-prolyl cis-trans isomerase [Rhodocyclaceae]
gi|489017960	129	19181	2	2	2	2	0.54	MULTISPECIES: phasin family protein [Thauera]
gi|492455720	37	23583	2	2	1	1	0.19	MULTISPECIES: RNA polymerase sigma70 factor [Bacteroides]
gi|489356861	88	8867	2	2	2	2	1.50	MULTISPECIES: RNA-binding protein Hfq [Ralstonia]
gi|490318203	80	9372	1	1	1	1	0.55	MULTISPECIES: transcriptional regulator [Alphaproteobacteria]
gi|491068245	56	9529	2	2	2	2	1.35	MULTISPECIES: transcriptional regulator [Serratia]
gi|494915124	69	28046	1	1	1	1	0.16	myo-inositol-1(or 4)-monophosphatase [Glaciecola psychrophila]
gi|635596374	58	54917	3	3	3	3	0.26	NAD-dependent aldehyde dehydrogenase [Comamonadaceae bacterium A1]
gi|344169638	40	22859	1	1	1	1	0.20	NADH-quinone oxidoreductase subunit C [blood disease bacterium R229]
gi|678277180	78	36517	5	5	1	1	0.12	NADH-quinone oxidoreductase subunit H [Criblamydia sequanensis CRIB-18]
gi|3046316	74	2780	1	1	1	1	2.82	Ndk [Azotobacter vinelandii]
gi|23392987	65	31007	1	1	1	1	0.14	nitrite reductase [uncultured bacterium]
gi|499558986	71	12189	1	1	1	1	0.40	nitrogen regulatory protein P-II 1 [Aromatoleum aromaticum]
gi|653251528	68	12290	1	1	1	1	0.40	nitrogen regulatory protein P-II 1 [Dechloromonas agitata]
gi|499606318	67	12301	1	1	1	1	0.40	nitrogen regulatory protein P-II 1 [Dechloromonas aromatica]
gi|30271879	48	10881	1	1	1	1	0.46	nitrogen regulatory protein P-II 2 [Pseudomonas putida]
gi|653333444	41	30004	1	1	1	1	0.15	NmrA family transcriptional regulator [Rhodococcus sp. JG-3]
gi|257824935	49	22933	1	1	1	1	0.20	NUDIX family hydrolase [Enterococcus faecium 1,141,733]
gi|76789924	74	40476	1	1	1	1	0.11	OmpA family protein [Riemerella anatipestifer]
gi|499606768	87	17918	1	1	1	1	0.26	outer membrane chaperone Skp [Dechloromonas aromatica]
gi|260220860	66	20900	1	1	1	1	0.22	Outer membrane protein A [Curvibacter putative symbiont of Hydra magnipapillata]
gi|671233059	56	38886	1	1	1	1	0.11	oxidoreductase [Chryseobacterium sp. JM1]
gi|292826548	85	106876	7	7	1	1	0.08	oxoglutarate dehydrogenase (succinyl-transferring), E1 component [Acinetobacter sp. SH024]
gi|545865	159	2938	7	7	2	2	12.30	p105=epidermal keratin type 1 intermediate filament protein homolog {29 kda fragment} [Mycoplasma, Peptide Partial, 24 aa]
gi|503030464	61	29540	1	1	1	1	0.15	pantothenate kinase [Prevotella melaninogenica]
gi|501492107	64	91121	2	2	1	1	0.05	PAS/PAC sensor hybrid histidine kinase [Chloroherpeton thalassium]
gi|656244575	54	34428	1	1	1	1	0.13	peptidase [Ornithinibacillus scapharcae]
gi|491633836	76	55178	3	3	1	1	0.08	peptidase M17, leucyl aminopeptidase [Pseudoalteromonas luteoviolacea]
gi|503842155	58	59034	2	2	1	1	0.07	peptidase S10 [Sphingobium sp. SYK-6]
gi|499605745	54	23731	1	1	1	1	0.19	peptidase S41 [Dechloromonas aromatica]
gi|668670387	84	40644	2	2	1	1	0.11	Peptide chain release factor 1 [Candidatus Accumulibacter sp. SK-01]
gi|491918126	91	18834	3	3	3	3	0.94	peptidoglycan-associated lipoprotein [Massilia timonae]
gi|491904276	62	20863	1	1	1	1	0.22	peroxiredoxin [Massilia timonae]
gi|489314863	60	40480	1	1	1	1	0.11	phage tail protein [Pseudomonas fluorescens]
gi|498160018	68	42182	2	2	1	1	0.10	phage tail protein [Streptomyces somaliensis]
gi|499608413	116	19034	2	2	2	2	0.55	phasin [Dechloromonas aromatica]
gi|494957056	62	31250	1	1	1	1	0.14	phasin [Sphingobium indicum]
gi|655957380	69	35620	1	1	1	1	0.13	phosphate ABC transporter substrate-binding protein [Azohydromonas australica]
gi|502794227	74	36944	1	1	1	1	0.12	phosphate ABC transporter substrate-binding protein [Sideroxydans lithotrophicus]
gi|694166397	46	35378	2	2	1	1	0.13	phosphate acetyltransferase Pta [Thermoanaerobacter kivui]
gi|496566430	46	64143	1	1	1	1	0.07	phosphoglucomutase [Lachnospiraceae bacterium 1_4_56FAA]
gi|375334695	58	22600	1	1	1	1	0.20	PhoX, partial [uncultured bacterium]
gi|497165480	45	44585	1	1	1	1	0.10	porin [Microvirga lotononidis]
gi|177826798	59	42001	1	1	1	1	0.11	PQQ-dehydrogenase, partial [Burkholderiales bacterium FAM1]
gi|490768969	57	63602	1	1	1	1	0.07	PQQ-dependent dehydrogenase, methanol/ethanol family [Ralstonia pickettii]
gi|495338250	97	17481	1	1	1	1	0.27	preprotein translocase subunit SecB [Methyloversatilis universalis]
gi|495754788	69	29510	1	1	1	1	0.15	preprotein translocase subunit TatC [Nitrolancea hollandica]
gi|495333152	58	11538	1	1	1	1	0.43	preprotein translocase subunit YajC [Methyloversatilis universalis]
gi|517456431	64	56009	1	1	1	1	0.08	prolyl-tRNA synthetase [Niabella aurantiaca]
gi|517914526	31	72127	1	1	1	1	0.06	protein flbA [Komagataeibacter europaeus]
gi|548433564	44	73827	1	1	1	1	0.06	Protein NorD [Halomonas sp. A3H3]
gi|551003539	46	27695	1	1	1	1	0.16	PTS alpha-glucoside transporter subunit IIBC [Lachnobacterium bovis]
gi|488483816	56	64198	1	1	1	1	0.07	PTS fructose transporter subunit IIA [Propionibacterium humerusii]
gi|344168935	46	64780	1	1	1	1	0.07	putative ABC-type sugar transporter, probable sugar binding precursor [blood disease bacterium R229]
gi|260223291	33	63499	1	1	1	1	0.07	Putative ATP-dependent RNA helicase rhlE [Curvibacter putative symbiont of Hydra magnipapillata]
gi|546346130	67	89257	1	1	1	1	0.05	putative uncharacterized protein [Alistipes sp. CAG:514]
gi|548131831	88	44836	9	9	1	1	0.10	putative uncharacterized protein [Dialister sp. CAG:357]
gi|547735447	70	36964	1	1	1	1	0.12	putative uncharacterized protein [Prevotella sp. CAG:1320]
gi|576103141	47	263269	1	1	1	1	0.02	Putative viral A-like repeat/charged repetitive motif protein [Borrelia miyamotoi FR64b]
gi|522107305	65	47227	3	3	1	1	0.09	radical SAM protein [Paenibacillus daejeonensis]
gi|1170615	68	23832	1	1	1	1	0.19	RecName: Full=Adenylate kinase {ECO:0000255|HAMAP-Rule:MF_00235}; Short=AK {ECO:0000255|HAMAP-Rule:MF_00235} {ECO:0000255|HAMAP-Rule:MF_00235}; AltName: Full=ATP-AMP transphosphorylase {ECO:0000255|HAMAP-Rule:MF_00235}; AltName: Full=ATP:AMP phospho
gi|127525	117	8280	2	2	2	2	1.65	RecName: Full=Major outer membrane lipoprotein; AltName: Full=Murein-lipoprotein; Flags: Precursor [Serratia marcescens]
gi|492586096	59	43506	1	1	1	1	0.10	recombinase RecF [Fusobacterium nucleatum]
gi|654429400	62	61593	4	4	1	1	0.07	recombination and repair protein [Pseudomonas syringae]
gi|488939801	56	60089	1	1	1	1	0.07	recombination protein RecJ [Campylobacter fetus]
gi|495974493	67	37330	1	1	1	1	0.12	redoxin, partial [Rhodopirellula maiorica]
gi|296429732	71	23943	1	1	1	1	0.19	repressor LexA [Clostridium difficile NAP07]
gi|499803441	57	23320	1	1	1	1	0.20	response regulator [Polaromonas sp. JS666]
gi|494941697	75	54390	2	2	1	1	0.08	Rhamnulokinase [Cronobacter condimenti]
gi|551177252	45	58928	1	1	1	1	0.07	ribonuclease [Fusobacterium russii]
gi|391434532	73	7678	1	1	1	1	0.69	ribosomal protein L28 [Yersinia pestis PY-02]
gi|144143	68	24268	1	1	1	1	0.19	ribosomal protein S4 [Buchnera aphidicola]
gi|499557390	109	24792	5	5	1	1	0.18	ribulose-phosphate 3-epimerase [Aromatoleum aromaticum]
gi|446369227	51	33125	2	2	1	1	0.14	RNA polymerase sigma factor SigJ [Bacillus thuringiensis]
gi|648292520	84	23080	7	7	1	1	0.20	RNA polymerase subunit sigma-24 [Acetivibrio cellulolyticus]
gi|495334240	60	8914	1	1	1	1	0.58	RNA-binding protein Hfq [Methyloversatilis universalis]
gi|503413356	83	9086	2	2	2	2	1.44	RNA-binding protein Hfq [Nitrosomonas sp. AL212]
gi|494248573	88	48507	2	2	2	2	0.19	S-adenosyl-L-homocysteine hydrolase [Methylophaga aminisulfidivorans]
gi|497309586	103	61820	3	3	1	1	0.07	signal protein [Desulfosporosinus sp. OT]
gi|495823278	92	65236	2	2	1	1	0.07	sodium:proton antiporter [Pseudovibrio sp. JE062]
gi|152071375	55	92650	1	1	1	1	0.05	soluble lytic murein transglycosylase precursor [Beggiatoa sp. PS]
gi|82409855	79	29271	2	2	2	2	0.33	SSU ribosomal protein S2P [Nitrosospira multiformis ATCC 25196]
gi|489356412	54	23733	1	1	1	1	0.19	Stringent starvation protein A [Ralstonia solanacearum]
gi|254672872	66	12527	1	1	1	1	0.39	succinate dehydrogenase cytochrome b-556 subunit [Neisseria meningitidis alpha275]
gi|495339608	65	22500	1	1	1	1	0.20	sugar ABC transporter substrate-binding protein [Methyloversatilis universalis]
gi|662060797	66	44827	1	1	1	1	0.10	sugar transporter [Streptomyces flavotricini]
gi|517686232	63	41751	1	1	1	1	0.11	sulfite oxidase [Rhizobium sp. 42MFCr.1]
gi|499557899	78	21670	1	1	1	1	0.21	superoxide dismutase [Aromatoleum aromaticum]
gi|656268163	53	19647	1	1	1	1	0.24	TetR family transcriptional regulator [Xanthomonadaceae bacterium JGI 0001020-F16]
gi|494647755	38	39396	1	1	1	1	0.11	thiouridylase [Sphingomonas sp. S17]
gi|668985568	34	56479	1	1	1	1	0.08	threonine dehydratase [Kluyvera ascorbata ATCC 33433]
gi|497971080	61	87509	1	1	1	1	0.05	TonB-dependent heme receptor, partial [Pectobacterium carotovorum]
gi|496238030	42	97279	1	1	1	1	0.04	TonB-dependent receptor [Alishewanella jeotgali]
gi|566142891	56	212962	1	1	1	1	0.02	toxin [Pseudomonas moraviensis]
gi|517222057	154	9526	4	4	4	4	4.52	transcriptional regulator [Methyloversatilis sp. NVD]
gi|499860375	76	9234	1	1	1	1	0.56	transcriptional regulator [Sphingopyxis alaskensis]
gi|695868152	72	40141	4	4	1	1	0.11	transcriptional regulator [Streptomyces albus]
gi|497187779	56	22369	2	2	1	1	0.20	Transcriptional regulator, AcrR family protein [Moraxella macacae]
gi|487459962	59	39065	1	1	1	1	0.11	translation elongation factor EF-1, subunit alpha, partial [Escherichia coli]
gi|495884175	63	97691	1	1	1	1	0.04	translation initiation factor IF-2 [Alishewanella aestuarii]
gi|493111868	55	21127	1	1	1	1	0.22	translocase [Streptomyces griseoaurantiacus]
gi|489327820	52	27115	1	1	1	1	0.17	transposase [Pseudomonas fluorescens]
gi|488620468	54	52858	1	1	1	1	0.08	trigger factor [Borrelia burgdorferi]
gi|499737836	57	34605	1	1	1	1	0.13	tRNA pseudouridine synthase B [Syntrophus aciditrophicus]
gi|495143163	63	58954	1	1	1	1	0.07	ubiquinone biosynthesis protein UbiB [Polaromonas sp. CF318]
gi|503505372	50	136411	1	1	1	1	0.03	UvrD/REP helicase [Sphaerochaeta coccoides]
gi|489888907	59	36933	1	1	1	1	0.12	zinc-binding dehydrogenase [Actinomyces odontolyticus]
gi|736332858	2677	11562	125	125	1	1	0.43	hypothetical protein, partial [Herbaspirillum rubrisubalbicans]
gi|498450534	233	15547	17	17	1	1	0.31	hypothetical protein [Enterococcus pallens]
gi|692533594	119	11392	3	3	3	3	1.93	hypothetical protein GS19_17550, partial [Acinetobacter sp. MII]
gi|493468520	105	35802	1	1	1	1	0.12	glyceraldehyde-3-phosphate dehydrogenase [delta proteobacterium NaphS2]
gi|500473160	103	33344	2	2	1	1	0.13	hypothetical protein [Geobacter uraniireducens]
gi|494616503	100	8409	2	2	2	2	1.61	MULTISPECIES: murein lipoprotein [Enterobacteriaceae]
gi|651248624	93	74180	1	1	1	1	0.06	RNase II stability modulator [Achromobacter xylosoxidans]
gi|3201898	93	8768	1	1	1	1	0.59	major outer membrane lipoprotein I [Pseudomonas asplenii]
gi|670619685	89	50826	4	4	1	1	0.09	hypothetical protein DB31_1281 [Hyalangium minutum]
gi|663396015	88	16761	1	1	1	1	0.28	hypothetical protein [Streptomyces purpeofuscus]
gi|489258035	88	30459	4	4	1	1	0.32	3-hydroxyacyl-CoA dehydrogenase [Brevundimonas diminuta]
gi|503499120	88	28360	1	1	1	1	0.16	XRE family transcriptional regulator [Verrucosispora maris]
gi|497309586	85	61820	2	2	1	1	0.07	signal protein [Desulfosporosinus sp. OT]
gi|516023977	81	42222	1	1	1	1	0.10	hypothetical protein [Herbaspirillum rubrisubalbicans]
gi|547735447	81	36964	1	1	1	1	0.12	putative uncharacterized protein [Prevotella sp. CAG:1320]
gi|557308536	81	20716	3	3	1	1	0.22	hypothetical protein [Campylobacter fetus]
gi|499676709	81	43163	1	1	1	1	0.10	hypothetical protein [Pelodictyon luteolum]
gi|544767997	78	24250	5	5	1	1	0.19	hypothetical protein [Ralstonia sp. AU12-08]
gi|672976258	78	36076	1	1	1	1	0.12	Ppx/GppA phosphatase [Bifidobacterium merycicum]
gi|497267074	78	51842	1	1	1	1	0.08	two-component system sensor histidine kinase [Fulvivirga imtechensis]
gi|505174285	77	22006	4	4	2	2	0.46	hypothetical protein [Nonlabens dokdonensis]
gi|739033831	77	7557	1	1	1	1	0.71	hypothetical protein, partial [Proteus hauseri]
gi|499557390	77	24792	2	2	1	1	0.18	ribulose-phosphate 3-epimerase [Aromatoleum aromaticum]
gi|736332971	77	10231	1	1	1	1	0.49	hypothetical protein, partial [Herbaspirillum rubrisubalbicans]
gi|564795808	75	63242	2	2	1	1	0.07	Penicillin-binding protein 2 [Parcubacteria bacterium RAAC4_OD1_1]
gi|497979074	75	3732	1	1	1	1	1.77	hypothetical protein, partial [Pectobacterium carotovorum]
gi|654347566	74	51035	1	1	1	1	0.09	hypothetical protein [Mastigocoleus testarum]
gi|488284969	74	12526	2	2	1	1	0.39	hypothetical protein [Enterococcus faecalis]
gi|502350885	74	4327	1	1	1	1	1.46	hypothetical protein [Dickeya zeae]
gi|281497907	73	37817	1	1	1	1	0.12	hypothetical protein pah_c221o058 [Parachlamydia acanthamoebae str. Hall's coccus]
gi|488620468	72	52858	1	1	1	1	0.08	trigger factor [Borrelia burgdorferi]
gi|499729170	72	60321	1	1	1	1	0.07	flagellar hook-associated protein FlgK [Sodalis glossinidius]
gi|734872297	72	20163	2	2	1	1	0.23	hypothetical protein [Desulfotomaculum sp. BIC-A1/1_c7]
gi|493558992	71	102893	1	1	1	1	0.04	amino acid adenylation enzyme/thioester reductase family protein [Xenococcus sp. PCC 7305]
gi|495650060	70	43680	1	1	1	1	0.10	MFS transporter [Pseudomonas sp. M47T1]
gi|654911774	70	49068	1	1	1	1	0.09	propionyl-CoA carboxylase [Burkholderia sp. JPY366]
gi|479334910	70	47713	1	1	1	1	0.09	hypothetical protein KN10_1107 [Anoxybacillus flavithermus NBRC 109594]
gi|258603987	69	34583	1	1	1	1	0.13	hypothetical protein HMPREF0297_0403 [Corynebacterium jeikeium ATCC 43734]
gi|739509180	69	14832	1	1	1	1	0.32	hypothetical protein, partial [Selenomonas ruminantium]
gi|491083632	69	35505	3	3	1	1	0.13	Aldo-keto reductase [Streptomyces mobaraensis]
gi|655912193	69	31157	2	2	1	1	0.14	hypothetical protein [Sporocytophaga myxococcoides]
gi|494036354	69	15624	1	1	1	1	0.30	hypothetical protein [Chthoniobacter flavus]
gi|407010729	68	9105	1	1	1	1	0.56	hypothetical protein ACD_5C00124G0002 [uncultured bacterium]
gi|495143163	68	58954	1	1	1	1	0.07	ubiquinone biosynthesis protein UbiB [Polaromonas sp. CF318]
gi|426285264	68	14288	1	1	1	1	0.33	Rhamnulokinase [Cronobacter dublinensis 582]
gi|695868152	68	40141	2	2	1	1	0.11	transcriptional regulator [Streptomyces albus]
gi|610708393	68	13298	1	1	1	1	0.36	hypothetical protein AT59_23185 [Aeromonas hydrophila AD9]
gi|545865	68	2938	2	2	1	1	2.65	p105=epidermal keratin type 1 intermediate filament protein homolog {29 kda fragment} [Mycoplasma, Peptide Partial, 24 aa]
gi|499639517	68	203572	1	1	1	1	0.02	serine/threonine protein kinase [Anabaena variabilis]
gi|664063214	67	6988	2	2	1	1	0.78	hypothetical protein [Streptomyces rimosus]
gi|517700784	66	21259	1	1	1	1	0.22	MULTISPECIES: hypothetical protein [Thioalkalivibrio]
gi|505459565	66	88501	1	1	1	1	0.05	N-acetylmuramoyl-L-alanine amidase [Streptococcus suis]
gi|495754788	66	29510	1	1	1	1	0.15	preprotein translocase subunit TatC [Nitrolancea hollandica]
gi|492747787	66	13478	1	1	1	1	0.36	hypothetical protein [Fusobacterium varium]
gi|551035716	66	28192	1	1	1	1	0.16	hypothetical protein [Butyrivibrio sp. AE3009]
gi|498160018	65	42182	1	1	1	1	0.10	phage tail protein [Streptomyces somaliensis]
gi|499550607	65	55930	1	1	1	1	0.08	transposase [Geobacillus kaustophilus]
gi|256384306	65	27417	1	1	1	1	0.16	putative liporotein [Mycoplasma mycoides subsp. capri str. GM12]
gi|386156418	65	19259	1	1	1	1	0.24	hypothetical protein EC990741_3074 [Escherichia coli 97.0259]
gi|490333293	64	31939	1	1	1	1	0.14	4-diphosphocytidyl-2C-methyl-D-erythritol kinase [Bifidobacterium pseudocatenulatum]
gi|497268294	64	60018	1	1	1	1	0.07	Delta-1-pyrroline-5-carboxylate dehydrogenase [Fulvivirga imtechensis]
gi|518493599	64	27674	1	1	1	1	0.16	hypothetical protein [Rhodococcus sp. 29MFTsu3.1]
gi|503030464	63	29540	1	1	1	1	0.15	pantothenate kinase [Prevotella melaninogenica]
gi|356697764	63	40008	1	1	1	1	0.11	hypothetical protein HMPREF9473_02636 [ [[Clostridium] hathewayi WAL-18680]
gi|692534111	63	11905	1	1	1	1	0.41	hypothetical protein GS19_17265, partial [Acinetobacter sp. MII]
gi|740872573	63	116288	1	1	1	1	0.04	hypothetical protein [Rikenellaceae bacterium M3]
gi|502611837	63	72307	1	1	1	1	0.06	transcriptional regulator [Edwardsiella tarda]
gi|511041090	63	49713	1	1	1	1	0.09	sugar (Glycoside-Pentoside-Hexuronide) transporter [Lachnospiraceae bacterium M18-1]
gi|556601695	62	38848	1	1	1	1	0.11	hypothetical protein [Actinoplanes friuliensis]
gi|489837214	62	27940	1	1	1	1	0.16	type IV secretion system protein virB8 [Neisseria mucosa]
gi|258586883	62	11924	1	1	1	1	0.41	hypothetical protein VMD_15750 [Vibrio mimicus VM573]
gi|500263108	62	46877	1	1	1	1	0.09	UDP-galactopyranose mutase [Pseudomonas stutzeri]
gi|496566704	62	22886	2	2	1	1	0.44	hypothetical protein [Lachnospiraceae bacterium 1_4_56FAA]
gi|652529945	62	49864	2	2	1	1	0.09	tryptophanase [Glycomyces arizonensis]
gi|651965210	61	97079	1	1	1	1	0.04	hypothetical protein [Azovibrio restrictus]
gi|696350008	61	65395	1	1	1	1	0.07	hypothetical protein, partial [Streptomyces sp. NRRL WC-3702]
gi|494915124	61	28046	1	1	1	1	0.16	myo-inositol-1(or 4)-monophosphatase [Glaciecola psychrophila]
gi|503952839	61	35991	1	1	1	1	0.12	hypothetical protein [Desulfosporosinus orientis]
gi|504021646	61	456385	1	1	1	1	0.01	RHS repeat-associated core domain-containing protein [[Clostridium] clariflavum]
gi|407001511	61	17387	1	1	1	1	0.27	hypothetical protein ACD_9C00319G0002 [uncultured bacterium]
gi|654954551	61	218980	1	1	1	1	0.02	metallophosphoesterase [Bacillus sp. J13]
gi|571045265	60	72280	1	1	1	1	0.06	Hypothetical protein [Streptomyces sp. FR1]
gi|500017225	60	31973	1	1	1	1	0.14	hypothetical protein [Syntrophobacter fumaroxidans]
gi|501492107	60	91121	1	1	1	1	0.05	PAS/PAC sensor hybrid histidine kinase [Chloroherpeton thalassium]
gi|678277180	60	36517	1	1	1	1	0.12	NADH-quinone oxidoreductase subunit H [Criblamydia sequanensis CRIB-18]
gi|326625137	60	72122	1	1	1	1	0.06	ggdef domain/eal domain protein [Salmonella enterica subsp. enterica serovar Dublin str. SD3246]
gi|499953320	60	87382	1	1	1	1	0.05	Lon protease [Nitrosomonas eutropha]
gi|547733975	60	73683	1	1	1	1	0.06	putative uncharacterized protein [Bacteroides sp. CAG:709]
gi|494444528	60	40911	1	1	1	1	0.11	MFS transporter [Gordonia otitidis]
gi|494919761	60	56715	1	1	1	1	0.08	alkaline phosphatase [Cellvibrio sp. BR]
gi|515998203	59	15140	1	1	1	1	0.32	hypothetical protein, partial [Vibrio vulnificus]
gi|739431709	59	24802	1	1	1	1	0.18	hypothetical protein [Rikenella microfusus]
gi|491643399	59	103135	1	1	1	1	0.04	DNA polymerase I [Grimontia hollisae]
gi|695899512	59	12082	1	1	1	1	0.40	hypothetical protein [Lactobacillus paracasei]
gi|495445511	59	35250	1	1	1	1	0.13	acyltransferase [Marinobacter manganoxydans]
gi|495967796	59	47094	1	1	1	1	0.09	transposase, IS116/IS110/IS902 family [Rhodopirellula maiorica]
gi|518769775	59	61310	1	1	1	1	0.07	hypothetical protein [Nocardia sp. BMG111209]
gi|511034208	59	37489	1	1	1	1	0.12	hypothetical protein [Lachnospiraceae bacterium 3-1]
gi|656267871	59	110382	1	1	1	1	0.04	membrane protein [Xanthomonadaceae bacterium JGI 0001020-F16]
gi|493778709	59	22083	1	1	1	1	0.21	MarR family transcriptional regulator [Agrobacterium albertimagni]
gi|499792706	59	33617	1	1	1	1	0.13	peptidyl-prolyl cis-trans isomerase [Rhodopseudomonas palustris]
gi|656049367	58	21526	1	1	1	1	0.21	hypothetical protein [Brevundimonas aveniformis]
gi|652393300	58	52223	1	1	1	1	0.08	hypothetical protein [Planktothrix rubescens]
gi|499954683	58	41651	1	1	1	1	0.11	flagellar biosynthesis protein FlhB [Nitrosomonas eutropha]
gi|410590155	58	14874	1	1	1	1	0.32	putative exported protein [Bordetella bronchiseptica Bbr77]
gi|655417671	58	463134	1	1	1	1	0.01	hypothetical protein [beta proteobacterium SCGC AAA027-K21]
gi|114890	58	141390	1	1	1	1	0.03	RecName: Full=Cellulose synthase operon protein C; Flags: Precursor [Komagataeibacter xylinus]
gi|551289410	58	45240	1	1	1	1	0.10	enolase [Aestuariimicrobium kwangyangense]
gi|495316928	58	41137	1	1	1	1	0.11	sugar ABC transporter ATPase [Reinekea blandensis]
gi|491617393	58	115531	1	1	1	1	0.04	hydrolase [Streptomyces bottropensis]
gi|505186085	58	27861	1	1	1	1	0.16	phage integrase family protein [Pseudomonas poae]
gi|493471768	57	10183	2	2	1	1	0.49	hypothetical protein [Dorea longicatena]
gi|648240153	57	35026	1	1	1	1	0.13	hypothetical protein [Paenibacillus senegalensis]
gi|2529467	57	54541	1	1	1	1	0.08	YokS [Bacillus subtilis subsp. subtilis str. 168]
gi|505204587	57	67784	1	1	1	1	0.06	AAA-ATPase-like protein [Clostridium saccharoperbutylacetonicum]
gi|126617492	57	76469	1	1	1	1	0.06	adenylate cyclase [Cyanothece sp. CCY0110]
gi|488784833	57	159848	1	1	1	1	0.03	hypothetical protein [Microscilla marina]
gi|504378896	57	81206	1	1	1	1	0.05	hypothetical protein [Lactobacillus amylovorus]
gi|493502097	57	23935	1	1	1	1	0.19	TenA family transcriptional regulator [Synechococcus sp. PCC 7335]
gi|488722642	57	117076	1	1	1	1	0.04	hypothetical protein [Planctomyces maris]
gi|495823599	57	41923	1	1	1	1	0.11	oxalate decarboxylase [Pseudovibrio sp. JE062]
gi|445968765	57	70182	1	1	1	1	0.06	tRNA uridine 5-carboxymethylaminomethyl modification protein [Staphylococcus aureus]
gi|491058855	57	49339	1	1	1	1	0.09	hypothetical protein [Riemerella anatipestifer]
gi|653635999	57	68296	1	1	1	1	0.06	histidine kinase [Clostridium cadaveris]
gi|116065739	56	19118	1	1	1	1	0.24	hypothetical protein BL107_08189 [Synechococcus sp. BL107]
gi|508730167	56	27281	1	1	1	1	0.17	conserved hypothetical protein [Oleispira antarctica RB-8]
gi|739882445	56	30879	2	2	1	1	0.15	membrane protein, partial [Streptomyces sp. BoleA5]
gi|503043733	56	47637	1	1	1	1	0.09	type II and III secretion system protein [Acetohalobium arabaticum]
gi|317403225	56	23863	1	1	1	1	0.19	hypothetical protein HMPREF0005_02120 [Achromobacter xylosoxidans C54]
gi|651382797	55	38782	1	1	1	1	0.11	ABC transporter substrate-binding protein [Butyrivibrio sp. WCD3002]
gi|547238833	55	97413	1	1	1	1	0.04	dNA mismatch repair protein MutS [Firmicutes bacterium CAG:884]
gi|517034508	54	24731	1	1	1	1	0.18	hypothetical protein [actinobacterium SCGC AAA278-I18]
gi|522135168	54	23162	1	1	1	1	0.20	hypothetical protein [Amycolatopsis balhimycina]
gi|646859420	54	36607	1	1	1	1	0.12	NAD-dependent dehydratase [Burkholderia sp. WSM2230]
gi|2338738	54	30316	1	1	1	1	0.15	unknown [Rhodobacter capsulatus]
gi|653059835	54	36246	1	1	1	1	0.12	glyceraldehyde-3-phosphate dehydrogenase [Bacteroidetes bacterium SCGC AAA027-N21]
gi|516569547	53	44246	1	1	1	1	0.10	hypothetical protein [Streptomyces sp. CNS615]
gi|652384525	52	41836	1	1	1	1	0.11	permease [Polaromonas sp. EUR3 1.2.1]
gi|654984058	52	49732	2	2	1	1	0.09	ABC transporter ATP-binding protein [Streptomyces sp. TAA204]
gi|497187779	50	22369	1	1	1	1	0.20	Transcriptional regulator, AcrR family protein [Moraxella macacae]
gi|648466057	50	7693	1	1	1	1	0.69	hypothetical protein [zeta proteobacterium SCGC AB-604-O16]
gi|739118812	50	73876	1	1	1	1	0.06	copper ABC transporter ATPase [Pseudomonas sp. S9]
gi|655262595	49	21969	1	1	1	1	0.21	guanylate kinase [Marinimicrobia bacterium SCGC AAA298-D23]
gi|490513994	49	18685	1	1	1	1	0.25	hypothetical protein [Prevotella oulorum]
gi|576103141	48	263269	1	1	1	1	0.02	Putative viral A-like repeat/charged repetitive motif protein [Borrelia miyamotoi FR64b]
gi|516256556	48	26465	1	1	1	1	0.17	hypothetical protein [Geitlerinema sp. PCC 7105]
gi|353193986	47	43071	1	1	1	1	0.10	hypothetical protein MycrhDRAFT_1926 [Mycobacterium rhodesiae JS60]
gi|491611414	47	121995	1	1	1	1	0.04	hypothetical protein [Porphyromonas catoniae]
gi|555686274	46	39297	1	1	1	1	0.11	hypothetical protein Q499_0265 [Chlamydia suis MD56]
gi|488625612	46	111483	1	1	1	1	0.04	hypothetical protein [Bacteroides sp. HPS0048]
gi|568600486	45	99818	1	1	1	1	0.04	tail protein [Dickeya dianthicola]
gi|494805642	45	26472	1	1	1	1	0.17	hypothetical protein [Candidatus Aquiluna sp. IMCC13023]
gi|291431648	43	24769	1	1	1	1	0.18	type-F conjugative transfer system protein TraW [Escherichia coli B185]
gi|740909439	42	44182	1	1	1	1	0.10	hypothetical protein [Paenibacillus stellifer]
gi|745644536	42	85127	1	1	1	1	0.05	hypothetical protein LK08_17620 [Streptomyces sp. MUSC 125]
gi|635640571	42	46020	1	1	1	1	0.10	arginine deiminase [Cellulomonas sp. KRMCY2]
gi|495670242	42	41798	1	1	1	1	0.11	malate dehydrogenase [Clostridium sp. M62/1]
gi|518383892	42	33006	1	1	1	1	0.14	hypothetical protein [Zymophilus raffinosivorans]
gi|503697915	42	35938	1	1	1	1	0.12	ABC transporter substrate-binding protein [Thermotoga thermarum]
gi|740002250	41	37975	1	1	1	1	0.12	hydrolase [Streptomyces sp. NRRL S-340]
gi|739302627	41	75987	1	1	1	1	0.06	diguanylate cyclase [Rhizobium sp. CF258]
gi|652397651	39	28571	1	1	1	1	0.16	MULTISPECIES: hypothetical protein [Planktothrix]
gi|518385091	39	46165	1	1	1	1	0.10	6-phosphofructokinase [Zymophilus raffinosivorans]
gi|491580505	38	51029	1	1	1	1	0.09	amidase [Saccharomonospora azurea]
gi|666641759	38	9287	1	1	1	1	0.55	hypothetical protein [Burkholderia sordidicola]
gi|515485377	38	24934	1	1	1	1	0.18	molecular chaperone DnaJ [Methylocystis parvus]
gi|379981706	35	78701	1	1	1	1	0.06	Multimodular transpeptidase-transglycosylase [Streptococcus pyogenes NS88.2]
gi|491085267	35	44639	1	1	1	1	0.10	hypothetical protein [Streptomyces mobaraensis]
gi|511082402	34	18789	1	1	1	1	0.25	pyruvate/2-ketoisovalerate family 2-oxoacid:acceptor oxidoreductase, gamma subunit [Oscillibacter sp. 1-3]
gi|551003539	31	27695	1	1	1	1	0.16	PTS alpha-glucoside transporter subunit IIBC [Lachnobacterium bovis]
gi|517593533	30	44943	1	1	1	1	0.10	hypothetical protein [Arthrobacter sp. 135MFCol5.1]
gi|740349076	30	13241	1	1	1	1	0.37	diacylglycerol kinase [Vibrio rhizosphaerae]
gi|596028220	29	12819	1	1	1	1	0.38	transporter domain protein, partial [Bacteroides fragilis str. DS-71]
gi|737037002	26	59143	1	1	1	1	0.07	acyl-CoA dehydrogenase [Devosia sp. DBB001]
gi|515148517	21	94009	1	1	1	1	0.05	hypothetical protein [Anaerophaga thermohalophila]
gi|734564199	18	37790	1	1	1	1	0.12	glycosyl transfera
gi|652814853	59	19961	1	1	1	1	0.23	16S rRNA processing protein RimM [Lachnospiraceae bacterium V9D3004]
gi|491092939	46	43476	2	2	1	1	0.10	1-deoxy-D-xylulose 5-phosphate reductoisomerase [Acinetobacter junii]
gi|260862972	69	68251	2	2	1	1	0.06	1-deoxy-D-xylulose-5-phosphate synthase [Selenomonas sputigena ATCC 35185]
gi|503982718	121	44671	5	5	1	1	0.10	3,4-dihydroxy-2-butanone 4-phosphate synthase [Niastella koreensis]
gi|489258035	71	30459	7	7	1	1	0.32	3-hydroxyacyl-CoA dehydrogenase [Brevundimonas diminuta]
gi|515485000	66	79414	2	2	1	1	0.05	3-hydroxyacyl-CoA dehydrogenase [Methylocystis parvus]
gi|740066928	60	46364	1	1	1	1	0.09	4-aminobutyrate aminotransferase [Streptomyces sp. PCS3-D2]
gi|496680255	61	11270	2	2	1	1	0.44	50S ribosomal protein L21 [Subdoligranulum sp. 4_3_54A2FAA]
gi|494055040	50	31212	2	2	1	1	0.14	6-phosphogluconate dehydrogenase [Candidatus Pelagibacter ubique]
gi|505204587	61	67784	1	1	1	1	0.06	AAA-ATPase-like protein [Clostridium saccharoperbutylacetonicum]
gi|551034891	74	68737	2	2	1	1	0.06	ABC transporter ATP-binding protein [Butyrivibrio sp. AE3009]
gi|490184258	72	26784	2	2	1	1	0.17	ABC transporter ATP-binding protein [Thermotoga maritima]
gi|517137744	33	35261	1	1	1	1	0.13	ABC transporter permease [Rhizobium giardinii]
gi|504014015	29	40491	1	1	1	1	0.11	ABC transporter substrate-binding protein [Azospirillum lipoferum]
gi|311097837	50	32824	1	1	1	1	0.14	ABC transporter, substrate-binding protein, family 3 [Streptococcus parasanguinis F0405]
gi|591276484	62	38740	1	1	1	1	0.11	acetylglutamate semialdehyde dehydrogenase [Bacillus sp. TS-2]
gi|489066911	62	16632	1	1	1	1	0.28	acetyltransferase [Chryseobacterium gleum]
gi|490232801	44	111912	1	1	1	1	0.04	acriflavine resistance protein B [Klebsiella oxytoca]
gi|702658035	61	38140	3	3	1	1	0.12	acyl-CoA dehydrogenase [Rhodococcus rhodochrous]
gi|734868712	40	88446	1	1	1	1	0.05	acyl-homoserine lactone acylase subunit beta [Pseudomonas fluorescens]
gi|491083632	182	35505	13	13	1	1	0.13	Aldo-keto reductase [Streptomyces mobaraensis]
gi|375052983	48	19202	1	1	1	1	0.24	alpha-L-arabinofuranosidase domain protein [Rhizobium sp. PDO1-076]
gi|654121800	36	41949	1	1	1	1	0.11	amidohydrolase [Desulfovibrio zosterae]
gi|493558992	126	102893	7	7	1	1	0.04	amino acid adenylation enzyme/thioester reductase family protein [Xenococcus sp. PCC 7305]
gi|502215751	35	99705	1	1	1	1	0.04	aminopeptidase N [Burkholderia glumae]
gi|493465254	54	42434	2	2	1	1	0.10	AMP-binding enzyme [delta proteobacterium NaphS2]
gi|548234410	59	18796	1	1	1	1	0.25	aTP synthase subunit b [Prevotella sp. CAG:873]
gi|490424729	55	60937	1	1	1	1	0.07	ATPase AAA [Bacteroides ovatus]
gi|551325456	52	51029	5	5	1	1	0.09	ATPase AAA [Pseudoalteromonas ruthenica]
gi|599566689	68	99719	3	3	1	1	0.04	ATP-dependent Clp protease ATP-binding subunit ClpA [Chondromyces apiculatus DSM 436]
gi|511029241	33	70799	1	1	1	1	0.06	ATP-dependent DNA helicase RecQ [Lachnospiraceae bacterium A4]
gi|639480562	53	80263	1	1	1	1	0.05	ATP-dependent helicase [Borrelia persica]
gi|497496997	45	26862	1	1	1	1	0.17	C4-dicarboxylate ABC transporter permease [Roseobacter sp. MED193]
gi|489217146	57	33624	1	1	1	1	0.13	carbamate kinase [Enterococcus gallinarum]
gi|4929901	3909	32244	90	90	1	1	0.30	Chain A, Glutathione S-transferase Fused With The Nuclear Matrix Targeting Signal Of The Transcription Factor Aml-1
gi|145579532	201	34301	49	49	2	2	0.28	Chain A, High Resolution Structure Of E. Coli GlucoseGALACTOSE Binding Protein Bound With Glucose
gi|225733897	184	18808	4	4	2	2	0.56	Chain A, Solution Structure Of E.Coli Slyd
gi|20664188	161	26142	3	3	1	1	0.17	Chain A, Structure Of Rsua
gi|551085508	60	39891	2	2	1	1	0.11	chemotaxis protein CheY [Candidatus Calescibacterium nevadense]
gi|501295068	45	58151	1	1	1	1	0.08	chemotaxis sensory transducer [Methylobacterium sp. 4-46]
gi|499490120	62	45578	2	2	1	1	0.10	chromosome partitioning protein ParA [Photobacterium profundum]
gi|496990601	54	47574	2	2	1	1	0.09	cobalamin biosynthesis protein CobW [Oribacterium sp. oral taxon 108]
gi|291357919	59	28135	2	2	1	1	0.16	conserved hypothetical protein [Streptomyces albus J1074]
gi|494184824	41	27654	1	1	1	1	0.16	crotonase [Oceanibulbus indolifex]
gi|737727266	53	36671	1	1	1	1	0.12	cysteine synthase [Gramella portivictoriae]
gi|489553543	67	49031	2	2	1	1	0.09	DNA helicase [Clostridium perfringens]
gi|491643399	68	103135	2	2	1	1	0.04	DNA polymerase I [Grimontia hollisae]
gi|651086967	67	38519	1	1	1	1	0.12	DNA processing chain A [Wolbachia endosymbiont of Cimex lectularius]
gi|546466735	65	28146	2	2	1	1	0.16	dolichol-phosphate mannosyltransferase [Eubacterium sp. CAG:86]
gi|547249760	38	34065	1	1	1	1	0.13	elongation factor Ts [Clostridium sp. CAG:127]
gi|690583218	129	27016	1	1	1	1	0.17	enhanced green fluorescent protein [Mycobacterium tuberculosis]
gi|498315590	59	28642	1	1	1	1	0.16	enoyl-CoA hydratase [Halomonas sp. KM-1]
gi|736911586	63	17586	2	2	1	1	0.27	ferric uptake regulator [Gilliamella apicola]
gi|504268087	61	53671	1	1	1	1	0.08	formate hydrogenlyase subunit 3/multisubunit Na+/H+ antiporter, MnhD subunit [Spirochaeta africana]
gi|326625137	77	72122	2	2	1	1	0.06	ggdef domain/eal domain protein [Salmonella enterica subsp. enterica serovar Dublin str. SD3246]
gi|651297603	72	34581	4	4	1	1	0.13	glmZ(sRNA)-inactivating NTPase [Actinobaculum schaalii]
gi|84375133	157	36623	11	11	1	1	0.12	gluconate utilization system Gnt-I transcriptional repressor [Vibrio splendidus 12B01]
gi|653059835	142	36246	4	4	1	1	0.41	glyceraldehyde-3-phosphate dehydrogenase [Bacteroidetes bacterium SCGC AAA027-N21]
gi|493468520	84	35802	1	1	1	1	0.12	glyceraldehyde-3-phosphate dehydrogenase [delta proteobacterium NaphS2]
[truncated: 165 more rows]
