# Supplementary material for: Postdiagenetic Changes in Kerogen Properties and Type by Bacterial Oxidation and Dehydrogenation
Source: Molecules. 2022 Apr 8;27(8):2408. doi: 10.3390/molecules27082408 (PMC9030554; doi:10.3390/molecules27082408)
Supplement: Supplementary file 1 [file molecules-27-02408-s001.zip › Supplementary Information C_Taxonomic composition of bacteria inhabiting shale rock.xlsx]

## Sheet: KEROGEN III
Phylum	Class	Order	Family	Genus	Species	% of mapped reads
Proteobacteria	Gammaproteobacteria	Pseudomonadales	Moraxellaceae	Acinetobacter	junii	11.97
Proteobacteria	Gammaproteobacteria	Pseudomonadales	Pseudomonadaceae	Pseudomonas	(slash calls)	11.765
Proteobacteria	Gammaproteobacteria	Pseudomonadales	Pseudomonadaceae	Pseudomonas	(slash calls)	10.61
Proteobacteria	Gammaproteobacteria	Pseudomonadales	Moraxellaceae	Acinetobacter	calcoaceticus	7.905
Proteobacteria	Gammaproteobacteria	Pseudomonadales	Moraxellaceae	Acinetobacter	(slash calls)	7.6
Firmicutes	Bacilli	Bacillales	Bacillaceae	Bacillus	(slash calls)	5.7
Proteobacteria	Gammaproteobacteria	Pseudomonadales	Pseudomonadaceae	Pseudomonas	pseudoalcaligenes	4.025
Proteobacteria	Gammaproteobacteria	Pseudomonadales	Moraxellaceae	Acinetobacter	(slash calls)	2.595
Firmicutes	Bacilli	Bacillales	Bacillaceae	Bacillus	(genus level ID only)	2.28
Proteobacteria	Alphaproteobacteria	Caulobacterales	Caulobacteraceae	Phenylobacterium	immobile	2.06
Proteobacteria	Alphaproteobacteria	Rhizobiales	Hyphomicrobiaceae	Rhizomicrobium	(genus level ID only)	1.865
Proteobacteria	Betaproteobacteria	Burkholderiales	Comamonadaceae	Diaphorobacter	oryzae	1.535
Proteobacteria	Betaproteobacteria	Rhodocyclales	Rhodocyclaceae	Methyloversatilis	(genus level ID only)	1.46
Bacteroidetes	Bacteroidia	Bacteroidales	Prevotellaceae	(family level ID only)		1.37
Firmicutes	Clostridia	Clostridiales	Clostridiaceae	Clostridium	(slash calls)	1.295
Proteobacteria	Betaproteobacteria	Burkholderiales	Comamonadaceae	(slash calls)		1.28
Proteobacteria	Gammaproteobacteria	Pseudomonadales	Moraxellaceae	(slash calls)		0.915
Firmicutes	Bacilli	Lactobacillales	Lactobacillaceae	Lactobacillus	odoratitofui	0.89
Proteobacteria	Epsilonproteobacteria	Campylobacterales	Campylobacteraceae	Sulfurospirillum	deleyianum	0.78
Proteobacteria	Betaproteobacteria	Burkholderiales	unclassified Burkholderiales	Thiomonas	cuprina	0.775
Proteobacteria	Alphaproteobacteria	Rhodobacterales	Rhodobacteraceae	(slash calls)		0.7
Proteobacteria	Alphaproteobacteria	Rhizobiales	Hyphomicrobiaceae	(family level ID only)		0.695
Proteobacteria	Alphaproteobacteria	Sphingomonadales	Sphingomonadaceae	(slash calls)		0.685
Firmicutes	Bacilli	Bacillales	Bacillaceae	Bacillus	(slash calls)	0.68
Proteobacteria	Gammaproteobacteria	Pseudomonadales	Moraxellaceae	Acinetobacter	calcoaceticus	0.66
Actinobacteria	Actinobacteria	Actinomycetales	Micrococcaceae	(slash calls)		0.57
Proteobacteria	Gammaproteobacteria	Pseudomonadales	Pseudomonadaceae	Pseudomonas	stutzeri	0.54
Proteobacteria	Alphaproteobacteria	Rhizobiales	Hyphomicrobiaceae	Rhizomicrobium	(genus level ID only)	0.475
Proteobacteria	Alphaproteobacteria	Sphingomonadales	Sphingomonadaceae	(slash calls)		0.45
Firmicutes	Clostridia	Clostridiales	Clostridiaceae	(slash calls)		0.395
Proteobacteria	Gammaproteobacteria	Pseudomonadales	Moraxellaceae	Acinetobacter	sp.	0.385
Firmicutes	Bacilli	Bacillales	Bacillaceae	Bacillus	seohaeanensis	0.38
Proteobacteria	Alphaproteobacteria	Sphingomonadales	Sphingomonadaceae	Sphingobium	(slash calls)	0.375
Proteobacteria	Gammaproteobacteria	Thiotrichales	Thiotrichaceae	(family level ID only)		0.35
Proteobacteria	Gammaproteobacteria	Pseudomonadales	Pseudomonadaceae	Pseudomonas	(genus level ID only)	0.35
Proteobacteria	Gammaproteobacteria	Pseudomonadales	Moraxellaceae	Acinetobacter	junii	0.34
Proteobacteria	Gammaproteobacteria	Acidithiobacillales	Acidithiobacillaceae	Acidithiobacillus	(slash calls)	0.325
Firmicutes	Bacilli	Bacillales	Bacillaceae	(slash calls)		0.32
Firmicutes	Bacilli	Lactobacillales	Lactobacillaceae	Lactobacillus	mucosae	0.32
Proteobacteria	Gammaproteobacteria	Thiotrichales	Thiotrichaceae	Thiothrix	(slash calls)	0.315
Proteobacteria	Gammaproteobacteria	Pseudomonadales	Moraxellaceae	Acinetobacter	(genus level ID only)	0.3
Proteobacteria	Alphaproteobacteria	Rhodospirillales	Acetobacteraceae	Acidiphilium	(slash calls)	0.295
Proteobacteria	Gammaproteobacteria	Pseudomonadales	Pseudomonadaceae	(slash calls)		0.28
Bacteroidetes	Flavobacteriia	Flavobacteriales	Flavobacteriaceae	(family level ID only)		0.255
Proteobacteria	Gammaproteobacteria	Pseudomonadales	Pseudomonadaceae	(slash calls)		0.24
Proteobacteria	Betaproteobacteria	Rhodocyclales	Rhodocyclaceae	Methyloversatilis	universalis	0.23
Proteobacteria	Alphaproteobacteria	Rhizobiales	Methylobacteriaceae	Methylobacterium	(slash calls)	0.2
Proteobacteria	Alphaproteobacteria	Caulobacterales	Caulobacteraceae	(slash calls)		0.195
Proteobacteria	Gammaproteobacteria	Pseudomonadales	Moraxellaceae	Acinetobacter	(genus level ID only)	0.195
Firmicutes	Bacilli	Bacillales	Bacillaceae	Bacillus	(genus level ID only)	0.195
Proteobacteria	Alphaproteobacteria	Caulobacterales	Caulobacteraceae	Phenylobacterium	sp.	0.195
Firmicutes	Clostridia	Clostridiales	Clostridiaceae	Clostridium	(slash calls)	0.18
Proteobacteria	Alphaproteobacteria	Sphingomonadales	Sphingomonadaceae	Sphingobium	xenophagum	0.175
Proteobacteria	Epsilonproteobacteria	Campylobacterales	Helicobacteraceae	Sulfuricurvum	kujiense	0.175
Proteobacteria	Gammaproteobacteria	Thiotrichales	Thiotrichaceae	Thiothrix	(genus level ID only)	0.175
Proteobacteria	Betaproteobacteria	Burkholderiales	Burkholderiaceae	(slash calls)		0.165
Proteobacteria	Alphaproteobacteria	Sphingomonadales	Sphingomonadaceae	Sphingobium	(slash calls)	0.16
Proteobacteria	Betaproteobacteria	Burkholderiales	unclassified Burkholderiales	Thiomonas	(genus level ID only)	0.16
Proteobacteria	Alphaproteobacteria	Caulobacterales	Caulobacteraceae	Phenylobacterium	(genus level ID only)	0.155
Proteobacteria	Gammaproteobacteria	Pseudomonadales	Moraxellaceae	Acinetobacter	rhizosphaerae	0.15
Firmicutes	Bacilli	Lactobacillales	Lactobacillaceae	Lactobacillus	(slash calls)	0.145
Proteobacteria	Alphaproteobacteria	Caulobacterales	Caulobacteraceae	Phenylobacterium	(slash calls)	0.135
Bacteroidetes	Bacteroidia	Bacteroidales	Prevotellaceae	(family level ID only)		0.13
Actinobacteria	Actinobacteria	Actinomycetales	Microbacteriaceae	Microbacterium	(slash calls)	0.13
Proteobacteria	Alphaproteobacteria	Caulobacterales	Caulobacteraceae	(slash calls)		0.125
Proteobacteria	Alphaproteobacteria	Rhizobiales	Methylobacteriaceae	Methylobacterium	(slash calls)	0.125
Proteobacteria	Epsilonproteobacteria	Campylobacterales	Campylobacteraceae	(family level ID only)		0.115
Proteobacteria	Alphaproteobacteria	Rhodobacterales	Rhodobacteraceae	Haematobacter	sp.	0.115
Proteobacteria	Epsilonproteobacteria	Campylobacterales	Campylobacteraceae	Sulfurospirillum	deleyianum	0.115
Proteobacteria	Betaproteobacteria	Burkholderiales	Comamonadaceae	Acidovorax	(slash calls)	0.11
Proteobacteria	Epsilonproteobacteria	Campylobacterales	Campylobacteraceae	Sulfurospirillum	(slash calls)	0.11
Proteobacteria	Alphaproteobacteria	Rhodobacterales	Rhodobacteraceae	(slash calls)		0.105
Proteobacteria	Betaproteobacteria	Burkholderiales	unclassified Burkholderiales	Thiomonas	cuprina	0.105
Proteobacteria	Alphaproteobacteria	Caulobacterales	Caulobacteraceae	(family level ID only)		0.095
Proteobacteria	Alphaproteobacteria	Rhizobiales	Bradyrhizobiaceae	(slash calls)		0.095
Firmicutes	Bacilli	Lactobacillales	Lactobacillaceae	Lactobacillus	odoratitofui	0.095
Proteobacteria	Gammaproteobacteria	Pseudomonadales	Pseudomonadaceae	Pseudomonas	savastanoi	0.095
Proteobacteria	Alphaproteobacteria	Rhizobiales	Bradyrhizobiaceae	Bosea	(slash calls)	0.09
Proteobacteria	Gammaproteobacteria	Pseudomonadales	Pseudomonadaceae	Pseudomonas	graminis	0.09
Proteobacteria	Betaproteobacteria	Burkholderiales	unclassified Burkholderiales	Thiomonas	(slash calls)	0.085
Actinobacteria	Actinobacteria	Actinomycetales	Corynebacteriaceae	(family level ID only)		0.08
Firmicutes	Bacilli	Bacillales	Bacillaceae	(family level ID only)		0.08
Proteobacteria	Alphaproteobacteria	Rhizobiales	Methylocystaceae	(slash calls)		0.08
Actinobacteria	Actinobacteria	Actinomycetales	Micrococcaceae	Arthrobacter	(slash calls)	0.08
Proteobacteria	Alphaproteobacteria	Rhizobiales	Hyphomicrobiaceae	(family level ID only)		0.075
Proteobacteria	Betaproteobacteria	Methylophilales	Methylophilaceae	Methylotenera	(genus level ID only)	0.075
Firmicutes	Clostridia	Clostridiales	Clostridiaceae	Clostridium	butyricum	0.07
Firmicutes	Bacilli	Lactobacillales	Lactobacillaceae	Lactobacillus	paracollinoides	0.07
Actinobacteria	Actinobacteria	Actinomycetales	Corynebacteriaceae	(family level ID only)		0.065
Proteobacteria	Gammaproteobacteria	Pseudomonadales	Pseudomonadaceae	Pseudomonas	(genus level ID only)	0.065
Cyanobacteria	Nostocophycideae	Nostocales	Nostocaceae	(family level ID only)		0.06
Firmicutes	Clostridia	Clostridiales	Clostridiaceae	(slash calls)		0.06
Proteobacteria	Gammaproteobacteria	Enterobacteriales	Enterobacteriaceae	(slash calls)		0.06
Proteobacteria	Alphaproteobacteria	Caulobacterales	Caulobacteraceae	Caulobacter	(genus level ID only)	0.06
Proteobacteria	Alphaproteobacteria	Caulobacterales	Caulobacteraceae	Phenylobacterium	muchangponense	0.06
Proteobacteria	Alphaproteobacteria	Caulobacterales	Caulobacteraceae	Phenylobacterium	immobile	0.06
Actinobacteria	Actinobacteria	Actinomycetales	Nocardiaceae	Rhodococcus	(slash calls)	0.06
Proteobacteria	Gammaproteobacteria	Pseudomonadales	Pseudomonadaceae	Pseudomonas	putida	0.055
Chloroflexi	Dehalococcoidia	Dehalococcoidales	Dehalococcoidaceae	(family level ID only)		0.05
Proteobacteria	Gammaproteobacteria	Chromatiales	Chromatiaceae	(family level ID only)		0.05
Actinobacteria	Actinobacteria	Actinomycetales	Micrococcaceae	(slash calls)		0.05
Proteobacteria	Alphaproteobacteria	Rhizobiales	Bradyrhizobiaceae	(slash calls)		0.05
Proteobacteria	Gammaproteobacteria	Pseudomonadales	Moraxellaceae	(slash calls)		0.05
Proteobacteria	Betaproteobacteria	Burkholderiales	Oxalobacteraceae	Massilia	varians	0.05
Actinobacteria	Actinobacteria	Actinomycetales	Micrococcaceae	Micrococcus	(slash calls)	0.05
Proteobacteria	Gammaproteobacteria	Pseudomonadales	Pseudomonadaceae	Pseudomonas	stutzeri	0.05
Proteobacteria	Gammaproteobacteria	Xanthomonadales	Xanthomonadaceae	Pseudomonas	(slash calls)	0.05
Proteobacteria	Alphaproteobacteria	Rhizobiales	Rhizobiaceae	Rhizobium	(slash calls)	0.05
Proteobacteria	Gammaproteobacteria	Thiotrichales	Thiotrichaceae	Thiothrix	nivea	0.05
Proteobacteria	Gammaproteobacteria	Pseudomonadales	Pseudomonadaceae	(family level ID only)		0.045
Proteobacteria	Gammaproteobacteria	Pseudomonadales	Moraxellaceae	Enhydrobacter	aerosaccus	0.045
Firmicutes	Bacilli	Bacillales	Bacillaceae	Virgibacillus	albus	0.045
Nitrospinae	Nitrospinia	Nitrospinales	Nitrospinaceae	(family level ID only)		0.04
Proteobacteria	Alphaproteobacteria	Rhodospirillales	Rhodospirillaceae	(family level ID only)		0.04
Actinobacteria	Actinobacteria	Actinomycetales	Sanguibacteraceae	(slash calls)		0.04
Proteobacteria	Alphaproteobacteria	Caulobacterales	Caulobacteraceae	Caulobacter	sp.	0.04
Proteobacteria	Betaproteobacteria	Rhodocyclales	Rhodocyclaceae	Methyloversatilis	(genus level ID only)	0.04
Proteobacteria	Alphaproteobacteria	Sphingomonadales	Sphingomonadaceae	Sphingomonas	(slash calls)	0.04
Proteobacteria	Gammaproteobacteria	Xanthomonadales	Xanthomonadaceae	Stenotrophomonas	(slash calls)	0.04
Proteobacteria	Epsilonproteobacteria	Campylobacterales	Helicobacteraceae	Sulfuricurvum	kujiense	0.04
Firmicutes	Erysipelotrichia	Erysipelotrichales	Erysipelotrichaceae	(family level ID only)		0.035
Proteobacteria	Betaproteobacteria	Methylophilales	Methylophilaceae	(family level ID only)		0.035
Proteobacteria	Epsilonproteobacteria	Campylobacterales	Campylobacteraceae	(slash calls)		0.035
Proteobacteria	Alphaproteobacteria	Rhodospirillales	Acetobacteraceae	Acidiphilium	(slash calls)	0.035
Proteobacteria	Gammaproteobacteria	Acidithiobacillales	Acidithiobacillaceae	Acidithiobacillus	(slash calls)	0.035
Proteobacteria	Betaproteobacteria	Burkholderiales	Comamonadaceae	Acidovorax	defluvii	0.035
Proteobacteria	Gammaproteobacteria	Pseudomonadales	Moraxellaceae	Acinetobacter	sp.	0.035
Proteobacteria	Gammaproteobacteria	Pseudomonadales	Moraxellaceae	Acinetobacter	johnsonii	0.035
Firmicutes	Bacilli	Bacillales	Alicyclobacillaceae	Alicyclobacillus	sp.	0.035
Proteobacteria	Betaproteobacteria	Burkholderiales	unclassified Burkholderiales	Aquabacterium	(genus level ID only)	0.035
Firmicutes	Bacilli	Bacillales	Bacillaceae	Bacillus	sp.	0.035
Firmicutes	Clostridia	Clostridiales	Clostridiaceae	Clostridium	(genus level ID only)	0.035
Proteobacteria	Gammaproteobacteria	Pseudomonadales	Moraxellaceae	Enhydrobacter	aerosaccus	0.035
Firmicutes	Bacilli	Lactobacillales	Lactobacillaceae	Lactobacillus	(genus level ID only)	0.035
Proteobacteria	Betaproteobacteria	Burkholderiales	Comamonadaceae	Pelomonas	puraquae	0.035
Proteobacteria	Alphaproteobacteria	Sphingomonadales	Sphingomonadaceae	Sphingomonas	(slash calls)	0.035
Proteobacteria	Alphaproteobacteria	Sphingomonadales	Sphingomonadaceae	Sphingomonas	ginsenosidimutans	0.035
Proteobacteria	Gammaproteobacteria	Thiotrichales	Thiotrichaceae	Thiothrix	caldifontis	0.035
Actinobacteria	Actinobacteria	Acidimicrobiales	Acidimicrobiaceae	(family level ID only)		0.03
Bacteroidetes	Sphingobacteriia	Sphingobacteriales	Sphingobacteriaceae	(family level ID only)		0.03
Proteobacteria	Gammaproteobacteria	Xanthomonadales	Xanthomonadaceae	(family level ID only)		0.03
Proteobacteria	Alphaproteobacteria	Rhodospirillales	Acetobacteraceae	(slash calls)		0.03
Proteobacteria	Betaproteobacteria	Burkholderiales	Burkholderiaceae	(slash calls)		0.03
Proteobacteria	Gammaproteobacteria	Acidithiobacillales	Acidithiobacillaceae	Acidithiobacillus	ferrivorans	0.03
Actinobacteria	Actinobacteria	Actinomycetales	Micrococcaceae	Arthrobacter	(genus level ID only)	0.03
Firmicutes	Bacilli	Lactobacillales	Lactobacillaceae	Lactobacillus	acidipiscis	0.03
Proteobacteria	Betaproteobacteria	Methylophilales	Methylophilaceae	Methylotenera	(genus level ID only)	0.03
Proteobacteria	Gammaproteobacteria	Xanthomonadales	Sinobacteraceae	Nevskia	(slash calls)	0.03
Proteobacteria	Gammaproteobacteria	Xanthomonadales	Sinobacteraceae	Nevskia	soli	0.03
Actinobacteria	Actinobacteria	Actinomycetales	Nocardiaceae	Rhodococcus	(slash calls)	0.03
Proteobacteria	Betaproteobacteria	Burkholderiales	Comamonadaceae	Rubrivivax	gelatinosus	0.03
Actinobacteria	Actinobacteria	Acidimicrobiales	Acidimicrobiaceae	(family level ID only)		0.025
Actinobacteria	Actinobacteria	Acidimicrobiales	Iamiaceae	(family level ID only)		0.025
Bacteroidetes	Sphingobacteriia	Sphingobacteriales	Chitinophagaceae	(family level ID only)		0.025
Proteobacteria	Betaproteobacteria	Burkholderiales	Oxalobacteraceae	(slash calls)		0.025
Proteobacteria	Gammaproteobacteria	Pseudomonadales	Moraxellaceae	Acinetobacter	johnsonii	0.025
Proteobacteria	Betaproteobacteria	Rhodocyclales	Rhodocyclaceae	Azospira	(genus level ID only)	0.025
Bacteroidetes	Flavobacteriia	Flavobacteriales	Flavobacteriaceae	Cloacibacterium	normanense	0.025
Proteobacteria	Betaproteobacteria	Burkholderiales	Comamonadaceae	Diaphorobacter	oryzae	0.025
Firmicutes	Bacilli	Lactobacillales	Lactobacillaceae	Lactobacillus	mucosae	0.025
Firmicutes	Negativicutes	Selenomonadales	Veillonellaceae	Megasphaera	hominis	0.025
Proteobacteria	Betaproteobacteria	Methylophilales	Methylophilaceae	Methylobacillus	(genus level ID only)	0.025
Proteobacteria	Gammaproteobacteria	Xanthomonadales	Sinobacteraceae	Nevskia	(genus level ID only)	0.025
Proteobacteria	Betaproteobacteria	Burkholderiales	Comamonadaceae	Pelomonas	puraquae	0.025
Proteobacteria	Alphaproteobacteria	Rhodobacterales	Rhodobacteraceae	Rhodobacter	sp.	0.025
Proteobacteria	Gammaproteobacteria	Thiotrichales	Thiotrichaceae	(family level ID only)		0.02
Proteobacteria	Gammaproteobacteria	Xanthomonadales	Xanthomonadaceae	(slash calls)		0.02
Proteobacteria	Gammaproteobacteria	Xanthomonadales	Xanthomonadaceae	(slash calls)		0.02
Proteobacteria	Alphaproteobacteria	Rhodospirillales	Acetobacteraceae	Acidisoma	sibirica	0.02
Actinobacteria	Actinobacteria	Actinomycetales	Micrococcaceae	Arthrobacter	agilis	0.02
Firmicutes	Clostridia	Clostridiales	Clostridiales Family XII. Incertae Sedis	Fusibacter	(genus level ID only)	0.02
Nitrospirae	Nitrospira	Nitrospirales	Nitrospiraceae	Leptospirillum	ferrooxidans	0.02
Proteobacteria	Betaproteobacteria	Burkholderiales	Oxalobacteraceae	Massilia	(genus level ID only)	0.02
Proteobacteria	Alphaproteobacteria	Rhizobiales	Methylobacteriaceae	Methylobacterium	radiotolerans	0.02
Proteobacteria	Gammaproteobacteria	Methylococcales	Methylococcaceae	Methylosarcina	quisquiliarum	0.02
Proteobacteria	Betaproteobacteria	Burkholderiales	Comamonadaceae	Pelomonas	(slash calls)	0.02
Proteobacteria	Betaproteobacteria	Burkholderiales	Comamonadaceae	Pelomonas	(slash calls)	0.02
Proteobacteria	Gammaproteobacteria	Pseudomonadales	Pseudomonadaceae	Pseudomonas	alcaligenes	0.02
Proteobacteria	Gammaproteobacteria	Pseudomonadales	Pseudomonadaceae	Pseudomonas	borbori	0.02
Proteobacteria	Gammaproteobacteria	Pseudomonadales	Pseudomonadaceae	Pseudomonas	fragi	0.02
Proteobacteria	Gammaproteobacteria	Pseudomonadales	Pseudomonadaceae	Pseudomonas	sp.	0.02
Firmicutes	Bacilli	Bacillales	Bacillaceae	Virgibacillus	(genus level ID only)	0.02
Bacteroidetes	Bacteroidia	Bacteroidales	Marinilabiliaceae	(family level ID only)		0.015
Bacteroidetes	Flavobacteriia	Flavobacteriales	Flavobacteriaceae	(family level ID only)		0.015
Firmicutes	Clostridia	Clostridiales	Clostridiaceae	(family level ID only)		0.015
Firmicutes	Erysipelotrichi	Erysipelotrichales	Erysipelotrichaceae	(family level ID only)		0.015
Nitrospinae	Nitrospinia	Nitrospinales	Nitrospinaceae	(family level ID only)		0.015
Proteobacteria	Alphaproteobacteria	Rhodospirillales	Acetobacteraceae	(family level ID only)		0.015
Proteobacteria	Epsilonproteobacteria	Campylobacterales	Campylobacteraceae	(family level ID only)		0.015
Proteobacteria	Alphaproteobacteria	Caulobacterales	Caulobacteraceae	(family level ID only)		0.015
Proteobacteria	Betaproteobacteria	Hydrogenophilales	Hydrogenophilaceae	(family level ID only)		0.015
Proteobacteria	Betaproteobacteria	Rhodocyclales	Rhodocyclaceae	(family level ID only)		0.015
Proteobacteria	Deltaproteobacteria	Myxococcales	Polyangiaceae	(family level ID only)		0.015
Proteobacteria	Gammaproteobacteria	Pseudomonadales	Moraxellaceae	(family level ID only)		0.015
Actinobacteria	Actinobacteria	Actinomycetales	Microbacteriaceae	(slash calls)		0.015
Firmicutes	Bacilli	Bacillales	Bacillaceae	(slash calls)		0.015
Proteobacteria	Alphaproteobacteria	Rhizobiales	Rhizobiaceae	(slash calls)		0.015
Proteobacteria	Betaproteobacteria	Burkholderiales	Comamonadaceae	(slash calls)		0.015
Proteobacteria	Gammaproteobacteria	Acidithiobacillales	Acidithiobacillaceae	Acidithiobacillus	(genus level ID only)	0.015
Firmicutes	Bacilli	Bacillales	Bacillaceae	Bacillus	seohaeanensis	0.015
Proteobacteria	Alphaproteobacteria	Caulobacterales	Caulobacteraceae	Brevundimonas	(slash calls)	0.015
Firmicutes	Clostridia	Clostridiales	Clostridiaceae	Clostridium	chromiireducens	0.015
Firmicutes	Clostridia	Clostridiales	Clostridiaceae	Clostridium	puniceum	0.015
Proteobacteria	Deltaproteobacteria	Desulfovibrionales	Desulfovibrionaceae	Desulfovibrio	arcticus	0.015
Proteobacteria	Deltaproteobacteria	Desulfuromonadales	Geobacteraceae	Geobacter	lovleyi	0.015
Firmicutes	Bacilli	Lactobacillales	Lactobacillaceae	Lactobacillus	manihotivorans	0.015
Proteobacteria	Gammaproteobacteria	Xanthomonadales	Xanthomonadaceae	Lysobacter	(genus level ID only)	0.015
Firmicutes	Negativicutes	Selenomonadales	Veillonellaceae	Megasphaera	elsdenii	0.015
Proteobacteria	Betaproteobacteria	Methylophilales	Methylophilaceae	Methylotenera	mobilis	0.015
Actinobacteria	Actinobacteria	Actinomycetales	Microbacteriaceae	Microbacterium	(slash calls)	0.015
Actinobacteria	Actinobacteria	Actinomycetales	Micrococcaceae	Micrococcus	(slash calls)	0.015
Actinobacteria	Actinobacteria	Actinomycetales	Micrococcaceae	Micrococcus	lylae	0.015
Proteobacteria	Gammaproteobacteria	Xanthomonadales	Sinobacteraceae	Nevskia	soli	0.015
Proteobacteria	Gammaproteobacteria	Xanthomonadales	Xanthomonadaceae	Pseudoxanthomonas	(genus level ID only)	0.015
Proteobacteria	Betaproteobacteria	Rhodocyclales	Rhodocyclaceae	Quatrionicoccus	(genus level ID only)	0.015
Proteobacteria	Alphaproteobacteria	Sphingomonadales	Sphingomonadaceae	Sphingobium	xenophagum	0.015
Proteobacteria	Alphaproteobacteria	Sphingomonadales	Sphingomonadaceae	Sphingomonas	echinoides	0.015
Proteobacteria	Alphaproteobacteria	Sphingomonadales	Sphingomonadaceae	Sphingomonas	koreensis	0.015
Proteobacteria	Gammaproteobacteria	Xanthomonadales	Xanthomonadaceae	Stenotrophomonas	rhizophila	0.015
Proteobacteria	Betaproteobacteria	Hydrogenophilales	Hydrogenophilaceae	Thiobacillus	sajanensis	0.015
Proteobacteria	Betaproteobacteria	Burkholderiales	unclassified Burkholderiales	Thiomonas	(genus level ID only)	0.015
Proteobacteria	Gammaproteobacteria	Thiotrichales	Thiotrichaceae	Thiothrix	(slash calls)	0.015
Bacteroidetes	Sphingobacteriia	Sphingobacteriales	Chitinophagaceae	(family level ID only)		0.01
Bacteroidetes	Bacteroidia	Bacteroidales	Marinifilaceae	(family level ID only)		0.01
Bacteroidetes	Cytophagia	Cytophagales	Cyclobacteriaceae	(family level ID only)		0.01
Bacteroidetes	Cytophagia	Cytophagales	Cytophagaceae	(family level ID only)		0.01
Bacteroidetes	Flavobacteriia	Flavobacteriales	Cryomorphaceae	(family level ID only)		0.01
Chloroflexi	Dehalococcoidia	Dehalococcoidales	Dehalococcoidaceae	(family level ID only)		0.01
Cyanobacteria	Nostocophycideae	Nostocales	Nostocaceae	(family level ID only)		0.01
Firmicutes	Clostridia	Clostridiales	Clostridiales Family XI. Incertae Sedis	(family level ID only)		0.01
Proteobacteria	Betaproteobacteria	Hydrogenophilales	Hydrogenophilaceae	(family level ID only)		0.01
Proteobacteria	Gammaproteobacteria	Chromatiales	Chromatiaceae	(family level ID only)		0.01
Proteobacteria	Gammaproteobacteria	Xanthomonadales	Xanthomonadaceae	(family level ID only)		0.01
Proteobacteria	Deltaproteobacteria	Desulfovibrionales	Desulfovibrionaceae	(family level ID only)		0.01
Acidobacteria	Acidobacteriia	Acidobacteriales	Acidobacteriaceae	(slash calls)		0.01
Actinobacteria	Actinobacteria	Actinomycetales	Gordoniaceae	(slash calls)		0.01
Firmicutes	Clostridia	Clostridiales	Lachnospiraceae	(slash calls)		0.01
Proteobacteria	Alphaproteobacteria	Rhizobiales	Methylocystaceae	(slash calls)		0.01
Proteobacteria	Betaproteobacteria	Burkholderiales	Comamonadaceae	Acidovorax	sp.	0.01
Proteobacteria	Betaproteobacteria	Burkholderiales	Comamonadaceae	Acidovorax	facilis	0.01
Proteobacteria	Gammaproteobacteria	Pseudomonadales	Moraxellaceae	Acinetobacter	lwoffii	0.01
Proteobacteria	Gammaproteobacteria	Pseudomonadales	Moraxellaceae	Acinetobacter	baylyi	0.01
Proteobacteria	Gammaproteobacteria	Pseudomonadales	Moraxellaceae	Acinetobacter	lwoffii	0.01
Firmicutes	Bacilli	Bacillales	Bacillaceae	Bacillus	sp.	0.01
Firmicutes	Bacilli	Bacillales	Bacillaceae	Bacillus	cereus	0.01
Proteobacteria	Alphaproteobacteria	Caulobacterales	Caulobacteraceae	Caulobacter	(genus level ID only)	0.01
Proteobacteria	Betaproteobacteria	Rhodocyclales	Rhodocyclaceae	Dechloromonas	sp.	0.01
Proteobacteria	Betaproteobacteria	Rhodocyclales	Rhodocyclaceae	Dechloromonas	(genus level ID only)	0.01
Proteobacteria	Deltaproteobacteria	Desulfovibrionales	Desulfovibrionaceae	Desulfovibrio	idahonensis	0.01
Proteobacteria	Alphaproteobacteria	Rhodospirillales	Rhodospirillaceae	Elstera	litoralis	0.01
Firmicutes	Bacilli	Bacillales	Bacillales incertae sedis	Exiguobacterium	(slash calls)	0.01
Proteobacteria	Alphaproteobacteria	Rhizobiales	Hyphomicrobiaceae	Hyphomicrobium	(slash calls)	0.01
Proteobacteria	Betaproteobacteria	Burkholderiales	Oxalobacteraceae	Janthinobacterium	lividum	0.01
Firmicutes	Bacilli	Lactobacillales	Lactobacillaceae	Lactobacillus	(slash calls)	0.01
Proteobacteria	Gammaproteobacteria	Xanthomonadales	Xanthomonadaceae	Lysobacter	(slash calls)	0.01
Proteobacteria	Betaproteobacteria	Burkholderiales	Oxalobacteraceae	Massilia	(slash calls)	0.01
Proteobacteria	Betaproteobacteria	Burkholderiales	Oxalobacteraceae	Massilia	sp.	0.01
Proteobacteria	Alphaproteobacteria	Rhizobiales	Beijerinckiaceae	Methylocapsa	(slash calls)	0.01
Proteobacteria	Gammaproteobacteria	Methylococcales	Methylococcaceae	Methylomonas	koyamae	0.01
Proteobacteria	Alphaproteobacteria	Rhizobiales	Methylocystaceae	Methylosinus	(genus level ID only)	0.01
Actinobacteria	Actinobacteria	Actinomycetales	Micrococcaceae	Micrococcus	lylae	0.01
Actinobacteria	Actinobacteria	Actinomycetales	Microbacteriaceae	Naasia	aerilata	0.01
Proteobacteria	Gammaproteobacteria	Xanthomonadales	Sinobacteraceae	Nevskia	(genus level ID only)	0.01
Proteobacteria	Gammaproteobacteria	Xanthomonadales	Sinobacteraceae	Nevskia	(slash calls)	0.01
Proteobacteria	Gammaproteobacteria	Xanthomonadales	Sinobacteraceae	Nevskia	terrae	0.01
Proteobacteria	Gammaproteobacteria	Xanthomonadales	Sinobacteraceae	Nevskia	terrae	0.01
Firmicutes	Bacilli	Bacillales	Bacillaceae	Ornithinibacillus	contaminans	0.01
Proteobacteria	Alphaproteobacteria	Rhodobacterales	Rhodobacteraceae	Paracoccus	(slash calls)	0.01
Bacteroidetes	Bacteroidia	Bacteroidales	Prevotellaceae	Prevotella	(genus level ID only)	0.01
Proteobacteria	Gammaproteobacteria	Pseudomonadales	Pseudomonadaceae	Pseudomonas	graminis	0.01
Proteobacteria	Gammaproteobacteria	Pseudomonadales	Pseudomonadaceae	Pseudomonas	savastanoi	0.01
Proteobacteria	Gammaproteobacteria	Pseudomonadales	Pseudomonadaceae	Pseudomonas	sp.	0.01
Proteobacteria	Gammaproteobacteria	Pseudomonadales	Pseudomonadaceae	Pseudomonas	pseudoalcaligenes	0.01
Firmicutes	Clostridia	Clostridiales	Ruminococcaceae	Ruminiclostridium	(genus level ID only)	0.01
Firmicutes	Bacilli	Bacillales	Bacillaceae	Saliterribacillus	(genus level ID only)	0.01
Proteobacteria	Gammaproteobacteria	Alteromonadales	Shewanellaceae	Shewanella	(slash calls)	0.01
Proteobacteria	Alphaproteobacteria	Sphingomonadales	Sphingomonadaceae	Sphingopyxis	(slash calls)	0.01
Firmicutes	Bacilli	Bacillales	Staphylococcaceae	Staphylococcus	(slash calls)	0.01
Proteobacteria	Gammaproteobacteria	Xanthomonadales	Xanthomonadaceae	Stenotrophomonas	sp.	0.01
Proteobacteria	Epsilonproteobacteria	Campylobacterales	Campylobacteraceae	Sulfurospirillum	(slash calls)	0.01
Proteobacteria	Gammaproteobacteria	Thiotrichales	Thiotrichaceae	Thiothrix	(genus level ID only)	0.01
Proteobacteria	Betaproteobacteria	Burkholderiales	Oxalobacteraceae	Undibacterium	sp.	0.01
Proteobacteria	Alphaproteobacteria	Rhizobiales	unclassified Rhizobiales	Vasilyevaea	enhydra	0.01
Firmicutes	Bacilli	Bacillales	Bacillaceae	Virgibacillus	albus	0.01
Actinobacteria	Actinobacteria	Acidimicrobiales	Iamiaceae	(family level ID only)		0.005
Actinobacteria	Actinobacteria	Nitriliruptorales	Nitriliruptoraceae	(family level ID only)		0.005
Bacteroidetes	Sphingobacteriia	Sphingobacteriales	Sphingobacteriaceae	(family level ID only)		0.005
Bacteroidetes	Bacteroidia	Bacteroidales	Porphyromonadaceae	(family level ID only)		0.005
Cyanobacteria	Gloeobacterophycideae	Gloeobacterales	Gloeobacteraceae	(family level ID only)		0.005
Firmicutes	Clostridia	Clostridiales	Clostridiaceae	(family level ID only)		0.005
Firmicutes	Erysipelotrichi	Erysipelotrichales	Erysipelotrichaceae	(family level ID only)		0.005
Firmicutes	Clostridia	Clostridiales	Peptococcaceae	(family level ID only)		0.005
Firmicutes	Clostridia	Thermoanaerobacterales	Thermoanaerobacteraceae	(family level ID only)		0.005
Ignavibacteriae	Ignavibacteria	Ignavibacteriales	Ignavibacteriaceae	(family level ID only)		0.005
Planctomycetes	Planctomycetia	Planctomycetales	Planctomycetaceae	(family level ID only)		0.005
Proteobacteria	Betaproteobacteria	Methylophilales	Methylophilaceae	(family level ID only)		0.005
Proteobacteria	Betaproteobacteria	Rhodocyclales	Rhodocyclaceae	(family level ID only)		0.005
Proteobacteria	Deltaproteobacteria	Myxococcales	Kofleriaceae	(family level ID only)		0.005
Proteobacteria	Deltaproteobacteria	Myxococcales	Polyangiaceae	(family level ID only)		0.005
Proteobacteria	Gammaproteobacteria	Acidithiobacillales	Acidithiobacillaceae	(family level ID only)		0.005
Proteobacteria	Gammaproteobacteria	Alteromonadales	Shewanellaceae	(family level ID only)		0.005
Proteobacteria	Gammaproteobacteria	Pseudomonadales	Moraxellaceae	(family level ID only)		0.005
Proteobacteria	Gammaproteobacteria	Xanthomonadales	Sinobacteraceae	(family level ID only)		0.005
Proteobacteria	Betaproteobacteria	Burkholderiales	unclassified Burkholderiales	(family level ID only)		0.005
Proteobacteria	Deltaproteobacteria	Myxococcales	Kofleriaceae	(family level ID only)		0.005
Proteobacteria	Gammaproteobacteria	Chromatiales	Thioalkalispiraceae	(family level ID only)		0.005
Proteobacteria	Gammaproteobacteria	Legionellales	Coxiellaceae	(family level ID only)		0.005
Proteobacteria	Gammaproteobacteria	Xanthomonadales	Sinobacteraceae	(family level ID only)		0.005
Spirochaetes	Spirochaetia	Spirochaetales	Brachyspiraceae	(family level ID only)		0.005
Spirochaetes	Spirochaetia	Spirochaetales	Spirochaetaceae	(family level ID only)		0.005
Thermodesulfobacteria	Thermodesulfobacteria	Thermodesulfobacteriales	Thermodesulfobacteriaceae	(family level ID only)		0.005
Thermodesulfobacteria	Thermodesulfobacteria	Thermodesulfobacteriales	Thermodesulfobacteriaceae	(family level ID only)		0.005
Acidobacteria	Acidobacteriia	Acidobacteriales	Acidobacteriaceae	(slash calls)		0.005
Actinobacteria	Actinobacteria	Actinomycetales	Sanguibacteraceae	(slash calls)		0.005
Firmicutes	Clostridia	Clostridiales	Peptostreptococcaceae	(slash calls)		0.005
Proteobacteria	Alphaproteobacteria	Rhizobiales	Methylobacteriaceae	(slash calls)		0.005
Proteobacteria	Alphaproteobacteria	Rhizobiales	Rhizobiaceae	(slash calls)		0.005
Proteobacteria	Alphaproteobacteria	Rhodospirillales	Acetobacteraceae	(slash calls)		0.005
Proteobacteria	Epsilonproteobacteria	Campylobacterales	Campylobacteraceae	(slash calls)		0.005
Proteobacteria	Gammaproteobacteria	Enterobacteriales	Enterobacteriaceae	(slash calls)		0.005
Proteobacteria	Alphaproteobacteria	Rhizobiales	Methylobacteriaceae	(slash calls)		0.005
Proteobacteria	Alphaproteobacteria	Rhizobiales	Phyllobacteriaceae	(slash calls)		0.005
Proteobacteria	Epsilonproteobacteria	Campylobacterales	Helicobacteraceae	(slash calls)		0.005
Proteobacteria	Gammaproteobacteria	Acidithiobacillales	Acidithiobacillaceae	(slash calls)		0.005
Firmicutes	Clostridia	Clostridiales	Eubacteriaceae	Acetobacterium	(slash calls)	0.005
Proteobacteria	Alphaproteobacteria	Rhodospirillales	Acetobacteraceae	Acidisoma	sibirica	0.005
Proteobacteria	Betaproteobacteria	Burkholderiales	Comamonadaceae	Acidovorax	(genus level ID only)	0.005
Proteobacteria	Betaproteobacteria	Burkholderiales	Comamonadaceae	Acidovorax	defluvii	0.005
Proteobacteria	Betaproteobacteria	Burkholderiales	Comamonadaceae	Acidovorax	(genus level ID only)	0.005
Proteobacteria	Betaproteobacteria	Burkholderiales	Comamonadaceae	Acidovorax	(slash calls)	0.005
Proteobacteria	Gammaproteobacteria	Pseudomonadales	Moraxellaceae	Acinetobacter	radioresistens	0.005
Firmicutes	Bacilli	Bacillales	Alicyclobacillaceae	Alicyclobacillus	sp.	0.005
Proteobacteria	Gammaproteobacteria	Xanthomonadales	Xanthomonadaceae	Aquimonas	(genus level ID only)	0.005
Proteobacteria	Gammaproteobacteria	Xanthomonadales	Xanthomonadaceae	Aquimonas	voraii	0.005
Actinobacteria	Actinobacteria	Actinomycetales	Micrococcaceae	Arthrobacter	(slash calls)	0.005
Actinobacteria	Actinobacteria	Actinomycetales	Micrococcaceae	Arthrobacter	methylotrophus	0.005
Proteobacteria	Betaproteobacteria	Rhodocyclales	Rhodocyclaceae	Azoarcus	(genus level ID only)	0.005
Proteobacteria	Betaproteobacteria	Rhodocyclales	Rhodocyclaceae	Azospira	(genus level ID only)	0.005
Firmicutes	Bacilli	Bacillales	Bacillaceae	Bacillus	humi	0.005
Actinobacteria	Actinobacteria	Actinomycetales	Dermabacteraceae	Brachybacterium	(slash calls)	0.005
Proteobacteria	Alphaproteobacteria	Caulobacterales	Caulobacteraceae	Caulobacter	(slash calls)	0.005
Bacteroidetes	Flavobacteriia	Flavobacteriales	Flavobacteriaceae	Chryseobacterium	(slash calls)	0.005
Bacteroidetes	Flavobacteriia	Flavobacteriales	Flavobacteriaceae	Cloacibacterium	(slash calls)	0.005
Firmicutes	Clostridia	Clostridiales	Clostridiaceae	Clostridium	paraputrificum	0.005
Firmicutes	Clostridia	Clostridiales	Clostridiaceae	Clostridium	sp.	0.005
Proteobacteria	Betaproteobacteria	Burkholderiales	Burkholderiaceae	Cupriavidus	(slash calls)	0.005
Proteobacteria	Betaproteobacteria	Rhodocyclales	Rhodocyclaceae	Dechloromonas	(genus level ID only)	0.005
Proteobacteria	Alphaproteobacteria	Rhizobiales	Hyphomicrobiaceae	Devosia	(genus level ID only)	0.005
Bacteroidetes	Flavobacteriia	Flavobacteriales	Flavobacteriaceae	Elizabethkingia	miricola	0.005
Bacteroidetes	Sphingobacteriia	Sphingobacteriales	Chitinophagaceae	Fodinibius	(genus level ID only)	0.005
Firmicutes	Clostridia	Clostridiales	Clostridiales Family XII. Incertae Sedis	Fusibacter	(genus level ID only)	0.005
Proteobacteria	Alphaproteobacteria	Rhodobacterales	Rhodobacteraceae	Haematobacter	sp.	0.005
Proteobacteria	Alphaproteobacteria	Rhodobacterales	Rhodobacteraceae	Haematobacter	(genus level ID only)	0.005
Proteobacteria	Alphaproteobacteria	Rhizobiales	Hyphomicrobiaceae	Hyphomicrobium	(slash calls)	0.005
Proteobacteria	Alphaproteobacteria	Rhodobacterales	Rhodobacteraceae	Labrenzia	alexandrii	0.005
Firmicutes	Bacilli	Lactobacillales	Lactobacillaceae	Lactobacillus	acidipiscis	0.005
Firmicutes	Bacilli	Lactobacillales	Lactobacillaceae	Lactobacillus	paracollinoides	0.005
Firmicutes	Bacilli	Lactobacillales	Lactobacillaceae	Lactobacillus	camelliae	0.005
Firmicutes	Bacilli	Lactobacillales	Lactobacillaceae	Lactobacillus	delbrueckii	0.005
Nitrospirae	Nitrospira	Nitrospirales	[Leptospirillaceae]	Leptospirillum	(genus level ID only)	0.005
Proteobacteria	Gammaproteobacteria	Xanthomonadales	Xanthomonadaceae	Lysobacter	(genus level ID only)	0.005
Proteobacteria	Alphaproteobacteria	Rhizobiales	Aurantimonadaceae	Martelella	(genus level ID only)	0.005
Proteobacteria	Betaproteobacteria	Burkholderiales	Oxalobacteraceae	Massilia	varians	0.005
Firmicutes	Negativicutes	Selenomonadales	Veillonellaceae	Megasphaera	elsdenii	0.005
Proteobacteria	Betaproteobacteria	Methylophilales	Methylophilaceae	Methylobacillus	(genus level ID only)	0.005
Proteobacteria	Alphaproteobacteria	Rhizobiales	Methylobacteriaceae	Methylobacterium	radiotolerans	0.005
Proteobacteria	Alphaproteobacteria	Rhizobiales	Beijerinckiaceae	Methylocapsa	(slash calls)	0.005
Proteobacteria	Alphaproteobacteria	Rhizobiales	Methylocystaceae	Methylocystis	(genus level ID only)	0.005
Proteobacteria	Gammaproteobacteria	Methylococcales	Methylococcaceae	Methylosarcina	quisquiliarum	0.005
Proteobacteria	Betaproteobacteria	Methylophilales	Methylophilaceae	Methylotenera	mobilis	0.005
Proteobacteria	Betaproteobacteria	Methylophilales	Methylophilaceae	Methylotenera	sp.	0.005
Proteobacteria	Alphaproteobacteria	Sphingomonadales	Sphingomonadaceae	Novosphingobium	hassiacum	0.005
Firmicutes	Bacilli	Bacillales	Bacillaceae	Paraliobacillus	(genus level ID only)	0.005
Firmicutes	Bacilli	Bacillales	Bacillaceae	Paraliobacillus	quinghaiensis	0.005
Proteobacteria	Alphaproteobacteria	Rhizobiales	Hyphomicrobiaceae	Pedomicrobium	(slash calls)	0.005
Firmicutes	Clostridia	Clostridiales	Clostridiaceae	Proteiniclasticum	ruminis	0.005
Proteobacteria	Gammaproteobacteria	Pseudomonadales	Pseudomonadaceae	Pseudomonas	plecoglossicida	0.005
Proteobacteria	Gammaproteobacteria	Pseudomonadales	Pseudomonadaceae	Pseudomonas	caricapapayae	0.005
Proteobacteria	Gammaproteobacteria	Pseudomonadales	Moraxellaceae	Psychrobacter	(slash calls)	0.005
Proteobacteria	Alphaproteobacteria	Rhizobiales	Rhizobiaceae	Rhizobium	(slash calls)	0.005
Proteobacteria	Gammaproteobacteria	Xanthomonadales	Xanthomonadaceae	Rhodanobacter	(slash calls)	0.005
Proteobacteria	Alphaproteobacteria	Rhodobacterales	Rhodobacteraceae	Rhodobacter	(genus level ID only)	0.005
Actinobacteria	Actinobacteria	Actinomycetales	Micrococcaceae	Rothia	dentocariosa	0.005
Proteobacteria	Betaproteobacteria	Burkholderiales	Comamonadaceae	Rubrivivax	gelatinosus	0.005
Bacteroidetes	Sphingobacteriia	Sphingobacteriales	Chitinophagaceae	Sediminibacterium	salmoneum	0.005
Bacteroidetes	Sphingobacteriia	Sphingobacteriales	Chitinophagaceae	Sediminibacterium	sp.	0.005
Proteobacteria	Gammaproteobacteria	Pseudomonadales	Pseudomonadaceae	Serpens	flexibilis	0.005
Proteobacteria	Alphaproteobacteria	Sphingomonadales	Sphingomonadaceae	Sphingomonas	echinoides	0.005
Proteobacteria	Alphaproteobacteria	Sphingomonadales	Sphingomonadaceae	Sphingomonas	koreensis	0.005
Proteobacteria	Alphaproteobacteria	Sphingomonadales	Sphingomonadaceae	Sphingopyxis	(slash calls)	0.005
Firmicutes	Bacilli	Bacillales	Planococcaceae	Sporosarcina	thermotolerans	0.005
Firmicutes	Bacilli	Bacillales	Staphylococcaceae	Staphylococcus	(slash calls)	0.005
Firmicutes	Bacilli	Bacillales	Staphylococcaceae	Staphylococcus	hominis	0.005
Proteobacteria	Gammaproteobacteria	Xanthomonadales	Xanthomonadaceae	Stenotrophomonas	(slash calls)	0.005
Proteobacteria	Gammaproteobacteria	Xanthomonadales	Xanthomonadaceae	Stenotrophomonas	(genus level ID only)	0.005
Firmicutes	Bacilli	Lactobacillales	Streptococcaceae	Streptococcus	(slash calls)	0.005
Firmicutes	Bacilli	Lactobacillales	Streptococcaceae	Streptococcus	salivarius	0.005
Proteobacteria	Epsilonproteobacteria	Campylobacterales	Campylobacteraceae	Sulfurospirillum	(genus level ID only)	0.005
Proteobacteria	Epsilonproteobacteria	Campylobacterales	Campylobacteraceae	Sulfurospirillum	halorespirans	0.005
Proteobacteria	Betaproteobacteria	Hydrogenophilales	Hydrogenophilaceae	Thiobacillus	(genus level ID only)	0.005
Proteobacteria	Betaproteobacteria	Hydrogenophilales	Hydrogenophilaceae	Thiobacillus	(slash calls)	0.005
Proteobacteria	Betaproteobacteria	Hydrogenophilales	Hydrogenophilaceae	Thiobacillus	Q	0.005
Proteobacteria	Betaproteobacteria	Burkholderiales	unclassified Burkholderiales	Thiomonas	(slash calls)	0.005
Proteobacteria	Betaproteobacteria	Burkholderiales	unclassified Burkholderiales	Thiomonas	delicata	0.005
Proteobacteria	Gammaproteobacteria	Thiotrichales	Thiotrichaceae	Thiothrix	nivea	0.005
Proteobacteria	Betaproteobacteria	Burkholderiales	Oxalobacteraceae	Undibacterium	sp.	0.005
Proteobacteria	Betaproteobacteria	Burkholderiales	Comamonadaceae	Variovorax	paradoxus	0.005
Proteobacteria	Alphaproteobacteria	Rhodospirillales	Acetobacteraceae	Zavarzinia	(genus level ID only)	0.005
Acidobacteria	Acidobacteria	unclassified Acidobacteria	Bryobacter	(family level ID only)		0
Firmicutes	Clostridia	Thermoanaerobacterales	Thermoanaerobacteraceae	(family level ID only)		0
Firmicutes	Erysipelotrichia	Erysipelotrichales	Erysipelotrichaceae	(family level ID only)		0
Planctomycetes	Planctomycetia	Planctomycetales	Planctomycetaceae	(family level ID only)		0
Proteobacteria	Alphaproteobacteria	Rhodobacterales	Rhodobacteraceae	(family level ID only)		0
Proteobacteria	Alphaproteobacteria	Rhodospirillales	Rhodospirillaceae	(family level ID only)		0
Proteobacteria	Betaproteobacteria	Nitrosomonadales	Nitrosomonadaceae	(family level ID only)		0
Proteobacteria	Betaproteobacteria	Nitrosomonadales	Spirillaceae	(family level ID only)		0
Proteobacteria	Deltaproteobacteria	Bdellovibrionales	Bacteriovoracaceae	(family level ID only)		0
Proteobacteria	Deltaproteobacteria	Desulfovibrionales	Desulfovibrionaceae	(family level ID only)		0
Proteobacteria	Gammaproteobacteria	Chromatiales	Halothiobacillaceae	(family level ID only)		0
Proteobacteria	Gammaproteobacteria	Chromatiales	Thioalkalispiraceae	(family level ID only)		0
Proteobacteria	Gammaproteobacteria	Pseudomonadales	Pseudomonadaceae	(family level ID only)		0
Spirochaetes	Spirochaetia	Spirochaetales	Brachyspiraceae	(family level ID only)		0
Proteobacteria	Alphaproteobacteria	Rhizobiales	Phyllobacteriaceae	(slash calls)		0
Proteobacteria	Betaproteobacteria	Burkholderiales	unclassified Burkholderiales	(slash calls)		0
Firmicutes	Clostridia	Clostridiales	Eubacteriaceae	Acetobacterium	(slash calls)	0
Proteobacteria	Gammaproteobacteria	Acidithiobacillales	Acidithiobacillaceae	Acidithiobacillus	(genus level ID only)	0
Proteobacteria	Betaproteobacteria	Burkholderiales	Comamonadaceae	Acidovorax	temperans	0
Firmicutes	Bacilli	Lactobacillales	Aerococcaceae	Aerococcus	urinaeequi	0
Actinobacteria	Actinobacteria	Actinomycetales	Micrococcaceae	Arthrobacter	(genus level ID only)	0
Proteobacteria	Betaproteobacteria	Rhodocyclales	Rhodocyclaceae	Azospira	oryzae	0
Proteobacteria	Gammaproteobacteria	Thiotrichales	Thiotrichaceae	Beggiatoa	(genus level ID only)	0
Proteobacteria	Alphaproteobacteria	Rhizobiales	Bradyrhizobiaceae	Bosea	massiliensis	0
Firmicutes	Clostridia	Clostridiales	Clostridiaceae	Clostridium	butyricum	0
Proteobacteria	Betaproteobacteria	Burkholderiales	Comamonadaceae	Comamonas	(slash calls)	0
Proteobacteria	Betaproteobacteria	Burkholderiales	Comamonadaceae	Comamonas	aquatica	0
Proteobacteria	Betaproteobacteria	Burkholderiales	Burkholderiaceae	Cupriavidus	necator	0
Proteobacteria	Betaproteobacteria	Rhodocyclales	Rhodocyclaceae	Dechloromonas	(slash calls)	0
Bacteroidetes	Sphingobacteriia	Sphingobacteriales	Chitinophagaceae	Fodinibius	(genus level ID only)	0
Proteobacteria	Betaproteobacteria	Burkholderiales	Oxalobacteraceae	Janthinobacterium	lividum	0
Actinobacteria	Actinobacteria	Actinomycetales	Micrococcaceae	Kocuria	palustris	0
Firmicutes	Bacilli	Lactobacillales	Lactobacillaceae	Lactobacillus	manihotivorans	0
Firmicutes	Bacilli	Lactobacillales	Streptococcaceae	Lactococcus	lactis	0
Proteobacteria	Betaproteobacteria	Burkholderiales	Oxalobacteraceae	Massilia	(genus level ID only)	0
Proteobacteria	Betaproteobacteria	Burkholderiales	Oxalobacteraceae	Massilia	jejuensis	0
Firmicutes	Negativicutes	Selenomonadales	Veillonellaceae	Megasphaera	hominis	0
Proteobacteria	Alphaproteobacteria	Rhizobiales	Methylobacteriaceae	Methylobacterium	persicinum	0
Proteobacteria	Gammaproteobacteria	Methylococcales	Methylococcaceae	Methylomonas	koyamae	0
Proteobacteria	Betaproteobacteria	Burkholderiales	Comamonadaceae	Pelomonas	aquatica	0
Bacteroidetes	Bacteroidia	Bacteroidales	Prevotellaceae	Prevotella	(genus level ID only)	0
Proteobacteria	Betaproteobacteria	Burkholderiales	Burkholderiaceae	Ralstonia	pickettii	0
Proteobacteria	Alphaproteobacteria	Rhizobiales	Bradyrhizobiaceae	Rhodopseudomonas	(slash calls)	0
Proteobacteria	Gammaproteobacteria	Pseudomonadales	Pseudomonadaceae	Serpens	flexibilis	0
Proteobacteria	Gammaproteobacteria	Alteromonadales	Shewanellaceae	Shewanella	(slash calls)	0
Proteobacteria	Gammaproteobacteria	Xanthomonadales	Xanthomonadaceae	Stenotrophomonas	maltophilia	0
Proteobacteria	Gammaproteobacteria	Xanthomonadales	Xanthomonadaceae	Stenotrophomonas	rhizophila	0
Proteobacteria	Betaproteobacteria	Hydrogenophilales	Hydrogenophilaceae	Thiobacillus	sajanensis	0
Proteobacteria	Gammaproteobacteria	Thiotrichales	Thiotrichaceae	Thiothrix	caldifontis	0
Firmicutes	Bacilli	Bacillales	Bacillaceae	Virgibacillus	(genus level ID only)	0

## Sheet: KEROGEN IV.1
Phylum	Class	Order	Family	Genus	Species	% of mapped reads
Actinobacteria	Actinobacteria	Actinomycetales	Microbacteriaceae	(family level ID only)		47.02
Proteobacteria	Gammaproteobacteria	Pseudomonadales	Pseudomonadaceae	(family level ID only)		16.86
Actinobacteria	Actinobacteria	Actinomycetales	Microbacteriaceae	(family level ID only)		6.77
Proteobacteria	Gammaproteobacteria	Pseudomonadales	Pseudomonadaceae	Pseudomonas	(slash calls)	4.75
Proteobacteria	Gammaproteobacteria	Pseudomonadales	Pseudomonadaceae	Pseudomonas	(genus level ID only)	2.22
Proteobacteria	Betaproteobacteria	Hydrogenophilales	Hydrogenophilaceae	Thiobacillus	(slash calls)	1.81
Proteobacteria	Gammaproteobacteria	Chromatiales	Ectothiorhodospiraceae	(family level ID only)		1.43
Proteobacteria	Betaproteobacteria	Burkholderiales	Burkholderiaceae	Limnobacter	(slash calls)	1.35
Proteobacteria	Betaproteobacteria	Hydrogenophilales	Hydrogenophilaceae	Thiobacillus	(genus level ID only)	1.01
Proteobacteria	Alphaproteobacteria	Rhizobiales	Methylobacteriaceae	Methylobacterium	(slash calls)	0.97
Actinobacteria	Actinobacteria	Actinomycetales	Microbacteriaceae	Yonghaparkia	alkaliphila	0.95
Proteobacteria	Betaproteobacteria	Burkholderiales	Burkholderiaceae	Limnobacter	(genus level ID only)	0.91
Proteobacteria	Betaproteobacteria	Burkholderiales	Burkholderiaceae	Limnobacter	thiooxidans	0.85
Proteobacteria	Betaproteobacteria	Hydrogenophilales	Hydrogenophilaceae	(family level ID only)		0.74
Proteobacteria	Alphaproteobacteria	Rhizobiales	Methylobacteriaceae	(family level ID only)		0.63
Proteobacteria	Alphaproteobacteria	Sphingomonadales	Sphingomonadaceae	(family level ID only)		0.6
Proteobacteria	Gammaproteobacteria	Xanthomonadales	Xanthomonadaceae	(family level ID only)		0.59
Proteobacteria	Betaproteobacteria	Hydrogenophilales	Hydrogenophilaceae	(family level ID only)		0.57
Proteobacteria	Gammaproteobacteria	Xanthomonadales	Sinobacteraceae	(family level ID only)		0.53
Proteobacteria	Gammaproteobacteria	Pseudomonadales	Pseudomonadaceae	Pseudomonas	stutzeri	0.45
Proteobacteria	Alphaproteobacteria	Rhizobiales	Bradyrhizobiaceae	(family level ID only)		0.43
Proteobacteria	Betaproteobacteria	Burkholderiales	Burkholderiaceae	(family level ID only)		0.42
Proteobacteria	Alphaproteobacteria	Sphingomonadales	Erythrobacteraceae	(family level ID only)		0.41
Proteobacteria	Gammaproteobacteria	Pseudomonadales	Pseudomonadaceae	(family level ID only)		0.4
Proteobacteria	Betaproteobacteria	Rhodocyclales	Rhodocyclaceae	(family level ID only)		0.35
Actinobacteria	Actinobacteria	Actinomycetales	Microbacteriaceae	Agromyces	(slash calls)	0.34
Proteobacteria	Gammaproteobacteria	Chromatiales	Chromatiaceae	(family level ID only)		0.31
Proteobacteria	Gammaproteobacteria	Thiotrichales	Thiotrichaceae	(family level ID only)		0.31
Chloroflexi	Dehalococcoidia	unclassified Dehalococcoidia	unclassified Dehalococcoidia	(family level ID only)		0.28
Proteobacteria	Gammaproteobacteria	Chromatiales	Ectothiorhodospiraceae	Acidiferrobacter	(genus level ID only)	0.27
Cyanobacteria	Oscillatoriophycideae	Oscillatoriales	Phormidiaceae	(family level ID only)		0.25
Gemmatimonadetes	Gemmatimonadetes	Gemmatimonadales	Gemmatimonadaceae	(family level ID only)		0.22
Nitrospirae	Nitrospira	Nitrospirales	Nitrospiraceae	Nitrospira	(genus level ID only)	0.21
Proteobacteria	Alphaproteobacteria	Sphingomonadales	Sphingomonadaceae	Altererythrobacter	troitsensis	0.21
Proteobacteria	Betaproteobacteria	Burkholderiales	Comamonadaceae	(family level ID only)		0.21
Proteobacteria	Alphaproteobacteria	Rhizobiales	Methylobacteriaceae	Methylobacterium	(genus level ID only)	0.19
Proteobacteria	Deltaproteobacteria	Desulfovibrionales	Desulfovibrionaceae	(family level ID only)		0.18
Actinobacteria	Actinobacteria	Acidimicrobiales	Acidimicrobiaceae	(family level ID only)		0.17
Proteobacteria	Betaproteobacteria	Burkholderiales	Oxalobacteraceae	(family level ID only)		0.14
Proteobacteria	Alphaproteobacteria	Rhodospirillales	Rhodospirillaceae	(family level ID only)		0.14
Actinobacteria	Actinobacteria	Actinomycetales	Microbacteriaceae	Frigoribacterium	sp,	0.13
Proteobacteria	Betaproteobacteria	Burkholderiales	Burkholderiaceae	(family level ID only)		0.13
Proteobacteria	Gammaproteobacteria	Chromatiales	Thioalkalispiraceae	(family level ID only)		0.13
Proteobacteria	Gammaproteobacteria	Pseudomonadales	Moraxellaceae	Acinetobacter	(slash calls)	0.12
Proteobacteria	Betaproteobacteria	Nitrosomonadales	Nitrosomonadaceae	(family level ID only)		0.12
Proteobacteria	Gammaproteobacteria	Legionellales	Coxiellaceae	(family level ID only)		0.12
Proteobacteria	Alphaproteobacteria	Sphingomonadales	Sphingomonadaceae	Sphingopyxis	(slash calls)	0.11
Proteobacteria	Alphaproteobacteria	Sphingomonadales	Sphingomonadaceae	Sphingomonas	(genus level ID only)	0.11
Proteobacteria	Betaproteobacteria	Burkholderiales	Burkholderiaceae	Limnobacter	sp,	0.1
Proteobacteria	Alphaproteobacteria	Sphingomonadales	Sphingomonadaceae	(family level ID only)		0.1
Bacteroidetes	Sphingobacteriia	Sphingobacteriales	Chitinophagaceae	Sediminibacterium	(slash calls)	0.09
Proteobacteria	Gammaproteobacteria	Xanthomonadales	Xanthomonadaceae	(family level ID only)		0.09
Actinobacteria	Actinobacteria	Actinomycetales	Pseudonocardiaceae	Pseudonocardia	(slash calls)	0.08
Proteobacteria	Alphaproteobacteria	Rhizobiales	Hyphomicrobiaceae	(family level ID only)		0.08
Actinobacteria	Actinobacteria	Actinomycetales	Microbacteriaceae	Salinibacterium	(genus level ID only)	0.07
Proteobacteria	Alphaproteobacteria	Rhodospirillales	Acetobacteraceae	(family level ID only)		0.07
Proteobacteria	Gammaproteobacteria	Pseudomonadales	Moraxellaceae	(family level ID only)		0.07
Actinobacteria	Actinobacteria	Actinomycetales	Pseudonocardiaceae	Pseudonocardia	(genus level ID only)	0.06
Proteobacteria	Betaproteobacteria	Burkholderiales	Comamonadaceae	Hydrogenophaga	(genus level ID only)	0.06
Actinobacteria	Actinobacteria	Actinomycetales	Micrococcaceae	(family level ID only)		0.06
Actinobacteria	Actinobacteria	Gaiellales	Gaiellaceae	(family level ID only)		0.06
Proteobacteria	Gammaproteobacteria	Xanthomonadales	Xanthomonadaceae	Lysobacter	(slash calls)	0.05
Proteobacteria	Alphaproteobacteria	Rhodospirillales	Rhodospirillaceae	(family level ID only)		0.05
Proteobacteria	Alphaproteobacteria	Rhizobiales	Methylobacteriaceae	(family level ID only)		0.05
Proteobacteria	Gammaproteobacteria	Methylococcales	Methylococcaceae	Methylococcus	(genus level ID only)	0.04
Actinobacteria	Actinobacteria	Gaiellales	Gaiellaceae	Gaiella	(genus level ID only)	0.04
Actinobacteria	Actinobacteria	Actinomycetales	Microbacteriaceae	Agromyces	(genus level ID only)	0.04
Firmicutes	Bacilli	Bacillales	Paenibacillaceae	(family level ID only)		0.04
Proteobacteria	Gammaproteobacteria	Thiotrichales	Thiotrichaceae	(family level ID only)		0.04
Actinobacteria	Actinobacteria	Actinomycetales	Nakamurellaceae	(family level ID only)		0.04
Bacteroidetes	Sphingobacteriia	Sphingobacteriales	Chitinophagaceae	(family level ID only)		0.04
Proteobacteria	Alphaproteobacteria	Rhizobiales	Hyphomicrobiaceae	(family level ID only)		0.04
Proteobacteria	Betaproteobacteria	Burkholderiales	Alcaligenaceae	(family level ID only)		0.04
Proteobacteria	Betaproteobacteria	Burkholderiales	Oxalobacteraceae	(family level ID only)		0.04
Proteobacteria	Deltaproteobacteria	Desulfobacterales	Desulfobacteraceae	(family level ID only)		0.04
Proteobacteria	Deltaproteobacteria	Myxococcales	Kofleriaceae	(family level ID only)		0.04
Proteobacteria	Epsilonproteobacteria	Campylobacterales	Helicobacteraceae	(family level ID only)		0.04
Proteobacteria	Alphaproteobacteria	Sphingomonadales	Sphingomonadaceae	Sphingomonas	sp,	0.03
Proteobacteria	Gammaproteobacteria	Pseudomonadales	Pseudomonadaceae	Pseudomonas	sp,	0.03
Proteobacteria	Betaproteobacteria	Burkholderiales	Oxalobacteraceae	Massilia	(slash calls)	0.03
Proteobacteria	Alphaproteobacteria	Rhizobiales	Bradyrhizobiaceae	Bradyrhizobium	(slash calls)	0.03
Actinobacteria	Actinobacteria	Actinomycetales	Demequinaceae	(family level ID only)		0.03
Actinobacteria	Actinobacteria	Actinomycetales	Micrococcaceae	(family level ID only)		0.03
Actinobacteria	Actinobacteria	Actinomycetales	Nocardioidaceae	(family level ID only)		0.03
Actinobacteria	Actinobacteria	Actinomycetales	Pseudonocardiaceae	(family level ID only)		0.03
Proteobacteria	Alphaproteobacteria	Parvularculales	Parvularculaceae	(family level ID only)		0.03
Actinobacteria	Actinobacteria	Actinomycetales	Pseudonocardiaceae	Pseudonocardia	chloroethenivorans	0.02
Actinobacteria	Actinobacteria	Actinomycetales	Nocardioidaceae	Nocardioides	(slash calls)	0.02
Actinobacteria	Actinobacteria	Actinomycetales	Microbacteriaceae	Mycetocola	(genus level ID only)	0.02
Proteobacteria	Alphaproteobacteria	Rhizobiales	Methylobacteriaceae	Methylobacterium	populi	0.02
Proteobacteria	Betaproteobacteria	Burkholderiales	Oxalobacteraceae	Massilia	(genus level ID only)	0.02
Proteobacteria	Alphaproteobacteria	Caulobacterales	Caulobacteraceae	Brevundimonas	(slash calls)	0.02
Actinobacteria	Actinobacteria	Actinomycetales	Micrococcaceae	Arthrobacter	(slash calls)	0.02
Firmicutes	Bacilli	Bacillales	Bacillaceae	(family level ID only)		0.02
Proteobacteria	Gammaproteobacteria	Chromatiales	Ectothiorhodospiraceae	(family level ID only)		0.02
Proteobacteria	Gammaproteobacteria	Pseudomonadales	Moraxellaceae	(family level ID only)		0.02
Actinobacteria	Actinobacteria	Actinomycetales	Cryptosporangiaceae	(family level ID only)		0.02
Actinobacteria	Actinobacteria	Coriobacteriales	Coriobacteriaceae	(family level ID only)		0.02
Actinobacteria	Actinobacteria	Nitriliruptorales	Nitriliruptoraceae	(family level ID only)		0.02
Bacteroidetes	Cytophagia	Cytophagales	Cytophagaceae	(family level ID only)		0.02
Cyanobacteria	Prochlorales	Prochlorales	Prochlorococcaceae	(family level ID only)		0.02
Firmicutes	Bacilli	Bacillales	Planococcaceae	(family level ID only)		0.02
Firmicutes	Clostridia	Clostridiales	Peptococcaceae	(family level ID only)		0.02
Nitrospirae	Nitrospira	Nitrospirales	Nitrospiraceae	(family level ID only)		0.02
Proteobacteria	Gammaproteobacteria	Alteromonadales	Alteromonadaceae	(family level ID only)		0.02
Proteobacteria	Gammaproteobacteria	Methylococcales	Methylococcaceae	(family level ID only)		0.02
Proteobacteria	Betaproteobacteria	Burkholderiales	Comamonadaceae	Variovorax	boronicumulans	0.01
Proteobacteria	Betaproteobacteria	Hydrogenophilales	Hydrogenophilaceae	Thiobacillus	thiophilus	0.01
Proteobacteria	Betaproteobacteria	Rhodocyclales	Rhodocyclaceae	Sterolibacterium	sp,	0.01
Proteobacteria	Alphaproteobacteria	Rhizobiales	Hyphomicrobiaceae	Rhodoplanes	sp,	0.01
Proteobacteria	Alphaproteobacteria	Rhizobiales	Hyphomicrobiaceae	Pedomicrobium	(slash calls)	0.01
Proteobacteria	Alphaproteobacteria	Rhizobiales	Methylobacteriaceae	Methylobacterium	gossipiicola	0.01
Proteobacteria	Gammaproteobacteria	Xanthomonadales	Xanthomonadaceae	Lysobacter	(genus level ID only)	0.01
Proteobacteria	Gammaproteobacteria	Legionellales	Legionellaceae	Legionella	(slash calls)	0.01
Proteobacteria	Gammaproteobacteria	Pseudomonadales	Moraxellaceae	Enhydrobacter	aerosaccus	0.01
Actinobacteria	Actinobacteria	Actinomycetales	Microbacteriaceae	Clavibacter	sp,	0.01
Proteobacteria	Gammaproteobacteria	Xanthomonadales	Xanthomonadaceae	Arenimonas	(slash calls)	0.01
Proteobacteria	Alphaproteobacteria	Sphingomonadales	Erythrobacteraceae	Altererythrobacter	(genus level ID only)	0.01
Proteobacteria	Gammaproteobacteria	Pseudomonadales	Moraxellaceae	Acinetobacter	(genus level ID only)	0.01
Proteobacteria	Gammaproteobacteria	Pseudomonadales	Moraxellaceae	Acinetobacter	calcoaceticus	0.01
Proteobacteria	Gammaproteobacteria	Pseudomonadales	Moraxellaceae	Acinetobacter	johnsonii	0.01
Proteobacteria	Gammaproteobacteria	Pseudomonadales	Moraxellaceae	Acinetobacter	towneri	0.01
Actinobacteria	Actinobacteria	Actinomycetales	Pseudonocardiaceae	(family level ID only)		0.01
Proteobacteria	Alphaproteobacteria	Rhodospirillales	Acetobacteraceae	(family level ID only)		0.01
Proteobacteria	Gammaproteobacteria	Legionellales	Legionellaceae	(family level ID only)		0.01
Actinobacteria	Actinobacteria	Actinomycetales	Brevibacteriaceae	(family level ID only)		0.01
Actinobacteria	Actinobacteria	Actinomycetales	Demequinaceae	(family level ID only)		0.01
Ignavibacteriae	Ignavibacteria	Ignavibacteriales	Melioribacteraceae	(family level ID only)		0.01
Proteobacteria	Alphaproteobacteria	Rhizobiales	Bradyrhizobiaceae	(family level ID only)		0.01
Proteobacteria	Alphaproteobacteria	Rhizobiales	Phyllobacteriaceae	(family level ID only)		0.01
Proteobacteria	Alphaproteobacteria	Rhizobiales	Xanthobacteraceae	(family level ID only)		0.01
Proteobacteria	Alphaproteobacteria	Sphingomonadales	Erythrobacteraceae	(family level ID only)		0.01
Proteobacteria	Betaproteobacteria	Burkholderiales	Comamonadaceae	(family level ID only)		0.01
Proteobacteria	Gammaproteobacteria	Alteromonadales	Colwelliaceae	(family level ID only)		0.01
Proteobacteria	Gammaproteobacteria	Arenicellales	Arenicellaceae	(family level ID only)		0.01
Proteobacteria	Gammaproteobacteria	Legionellales	Legionellaceae	(family level ID only)		0.01
Proteobacteria	Gammaproteobacteria	Thiotrichales	Piscirickettsiaceae	(family level ID only)		0.01
Proteobacteria	Gammaproteobacteria	unclassified Gammaproteobacteria	unclassified Gammaproteobacteria	(family level ID only)		0.01
Thermodesulfobacteria	Thermodesulfobacteria	Thermodesulfobacteriales	Thermodesulfobacteriaceae	(family level ID only)		0.01
Proteobacteria	Alphaproteobacteria	Sphingomonadales	Sphingomonadaceae	Sphingosinicella	(genus level ID only)	0
Nitrospirae	Nitrospira	Nitrospirales	Nitrospiraceae	Nitrospira	(slash calls)	0
Proteobacteria	Gammaproteobacteria	Legionellales	Legionellaceae	Legionella	(genus level ID only)	0
Proteobacteria	Gammaproteobacteria	Legionellales	Legionellaceae	Legionella	pneumophila	0
Proteobacteria	Alphaproteobacteria	Caulobacterales	Caulobacteraceae	Brevundimonas	alba	0
Proteobacteria	Alphaproteobacteria	Caulobacterales	Caulobacteraceae	(family level ID only)		0
Firmicutes	Bacilli	Bacillales	Bacillaceae	(family level ID only)		0
Firmicutes	Clostridia	Clostridiales	Clostridiaceae	(family level ID only)		0
Spirochaetes	Spirochaetia	Spirochaetales	Leptospiraceae	(family level ID only)		0

## Sheet: KEROGEN IV.2
Phylum	Class	Order	Family	Genus	Species	% of mapped reads per primer
Firmicutes	Bacilli	Bacillales	Bacillaceae	Bacillus	(genus level ID only)	38.49
Actinobacteria	Actinobacteria	Actinomycetales	Micrococcaceae	(slash calls)		28.59
Firmicutes	Bacilli	Bacillales	Bacillaceae	(slash calls)		18.18
Firmicutes	Bacilli	Bacillales	Bacillaceae	Bacillus	seohaeanensis	8.01
Firmicutes	Bacilli	Bacillales	Bacillaceae	(family level ID only)		2.63
Actinobacteria	Actinobacteria	Actinomycetales	Micrococcaceae	(family level ID only)		2.08
Firmicutes	Bacilli	Bacillales	Bacillaceae	Bacillus	(slash calls)	1.48
Firmicutes	Bacilli	Bacillales	Bacillaceae	Bacillus	sp,	0.22
Firmicutes	Bacilli	Bacillales	Bacillaceae	Anoxybacillus	sp,	0.15
Firmicutes	Bacilli	Bacillales	Bacillaceae	Anoxybacillus	(genus level ID only)	0.09
Firmicutes	Bacilli	Bacillales	Bacillaceae	Anoxybacillus	kestanbolensis	0.03
Firmicutes	Bacilli	Bacillales	Bacillaceae	Bacillus	foraminis	0.02
Firmicutes	Bacilli	Bacillales	Bacillaceae	Anoxybacillus	(slash calls)	0.01
Firmicutes	Bacilli	Bacillales	Bacillaceae	Anoxybacillus	tepidamans	0.01
Firmicutes	Bacilli	Bacillales	Bacillaceae	Bacillus	endophyticus	0.01
Proteobacteria	Gammaproteobacteria	Thiotrichales	Thiotrichaceae	Thiothrix	(slash calls)	0.01
